# Supplementary material for: Transposable elements regulate thymus development and function
Source: eLife. 2024 Apr 18;12:RP91037. doi: 10.7554/eLife.91037 (PMC11026094; doi:10.7554/eLife.91037)
Supplement: Supplementary file 1. — (a) Expression of TE subfamilies throughout thymus development. (b) Correlation between TE expression and cell proliferation scores. (c) Correlation between KZFP and TE subfamily expression. (d) Interactions between TE and transcription factors. (e) ENCODE dataset – samples characteristics. (f) Characteristics of TE promoter and enhancer candidates. (g) Differential expression of TE between APC subsets. (h) Gene signatures enriched in pDC relative to other APC subsets. (i) Murine TE loci regulated by Aire, Chd4, and Fezf2. (j) Characteristics of the identified TE-derived MAP. [file elife-91037-supp1.xlsx]

## Sheet: Supplementary file 1a
Supplementary file 1a. Expression of TE subfamilies throughout thymus development.
TE subfamily	Cell type	7week	8week	9week	11week	12week	13week	14week	16week	17week	3month	10month	30month	15-20year	20-25year	35-40year
L1P5	fibroblast	0.73029	0	0.415245	0.303961	0.564247	1	0.924933	0.837929	0.676828	0	0	0	0.313636	0.717013	0.0581753
AluY	fibroblast	1	0.920015	0.943958	0.686744	0.633356	0.890925	0.840878	0.869285	0.811225	0.385635	0	0	0.19639	0.81838	0.260263
L1MB5	fibroblast	1	0.726856	0.806508	0.469926	0.479026	0.604218	0.726841	0.663294	0.717413	0.258988	0	0	0.142959	0.673373	0.132331
AluSc	fibroblast	1	0.886394	0.895914	0.60626	0.552083	0.815242	0.758855	0.806412	0.736188	0.262831	0	0	0.118391	0.727241	0.138476
HAL1	fibroblast	1	0.831484	0.785593	0.557386	0.53955	0.736831	0.813964	0.741104	0.766859	0.315137	0	0	0.258614	0.679983	0.179547
L2a	fibroblast	1	0.860334	0.859227	0.676674	0.688597	0.858667	0.858924	0.852464	0.83942	0.468202	0	0	0.415595	0.780949	0.370867
L1MA9	fibroblast	1	0.885863	0.817364	0.600359	0.528958	0.774741	0.887474	0.787961	0.869997	0.303776	0	0	0.239948	0.777987	0.1507
L2	fibroblast	1	0.831008	0.881877	0.629792	0.655713	0.845475	0.886505	0.857806	0.849557	0.356118	0	0	0.320651	0.748621	0.246906
L1PA4	fibroblast	1	0.939882	0.792982	0.59589	0.522804	0.778295	0.81459	0.794011	0.819862	0.241391	0	0	0.195033	0.817008	0.186316
AluSg	fibroblast	1	0.885102	0.894923	0.622009	0.593637	0.81525	0.779288	0.816923	0.740983	0.313498	0	0	0.128057	0.736855	0.160262
MSTA.int	fibroblast	0.545785	1	0.452543	0.235875	0.348504	0.448677	0.458664	0.442415	0.600595	0.04794	0	0	0.214727	0.561509	0.139131
L1PA8A	fibroblast	1	0.771172	0.64215	0.50846	0.39798	0.704282	0.898919	0.686658	0.865566	0.205546	0	0	0.171521	0.61406	0.130881
AluJb	fibroblast	1	0.920413	0.932013	0.723172	0.687982	0.897182	0.860862	0.879197	0.838515	0.454994	0	0	0.356944	0.822819	0.332364
L1MC4	fibroblast	1	0.913563	0.803556	0.579487	0.5416	0.754215	0.835544	0.762841	0.788693	0.325784	0	0	0.236889	0.713426	0.2143
HUERS.P3b.int	fibroblast	0.466747	1	0.33235	0.117371	0.183778	0.285396	0.293025	0.276631	0.533833	0.138549	0	0	0.100546	0.4026	0.0661956
AluJo	fibroblast	1	0.846771	0.904234	0.673203	0.649596	0.865023	0.82891	0.853579	0.80268	0.377663	0	0	0.28648	0.79301	0.281532
L1MDb	fibroblast	0.387505	0.967908	0.870914	0.687871	0.431664	0.757055	0.711576	0.624864	1	0.637746	0	0	0.114967	0.657573	0.264272
AluSp	fibroblast	1	0.857352	0.902098	0.649193	0.595799	0.832619	0.787556	0.823776	0.757204	0.38329	0	0	0.182769	0.760956	0.202947
L1MC1	fibroblast	1	0.904772	0.751212	0.496565	0.452789	0.677312	0.777956	0.71287	0.771523	0.289818	0	0	0.195331	0.760239	0.149131
MLT1C	fibroblast	1	0.9045	0.628581	0.405418	0.443837	0.558028	0.656508	0.597804	0.693665	0.344954	0	0	0.298479	0.617991	0.172017
AluSz	fibroblast	1	0.899128	0.919859	0.69437	0.652416	0.868511	0.827505	0.85722	0.801941	0.437935	0	0	0.258377	0.798121	0.309271
AluSx1	fibroblast	1	0.916905	0.91508	0.688497	0.649875	0.865648	0.825136	0.85532	0.795231	0.406453	0	0	0.241016	0.800114	0.286288
MIRb	fibroblast	1	0.889003	0.868019	0.692437	0.696031	0.862572	0.861526	0.847172	0.854888	0.516121	0	0	0.437341	0.791589	0.388479
MLT1K	fibroblast	0.77706	1	0.637726	0.291768	0.349892	0.530308	0.514974	0.529424	0.615621	0.226419	0	0	0.105568	0.541421	0.129723
LTR5_Hs	fibroblast	0.974286	0.730071	1	0.416434	0.416102	0.622955	0.539574	0.667247	0.730231	0.113881	0	0	0.0144325	0.702422	0.0517549
HERVIP10F.int	fibroblast	1	0.399092	0.254913	0.103442	0.120221	0.172104	0.262833	0.217721	0.458643	0.0775284	0	0	0.293636	0.226904	0.0339863
LTR16A1	fibroblast	1	0.701173	0.162555	0.113136	0.176326	0.256994	0.174527	0.223839	0.290543	0.184425	0	0	0.194466	0.220146	0.148483
L1M6	fibroblast	1	0.876288	0.59622	0.319335	0.305866	0.581419	0.700229	0.595775	0.757199	0.200531	0	0	0.0982028	0.500687	0.0794703
THE1D.int	fibroblast	0.937911	1	0.425568	0.128068	0.296268	0.398935	0.425707	0.382743	0.591477	0.236319	0	0	0.127495	0.494639	0.129617
LTR48B	fibroblast	0.678648	0.232302	1	0.892475	0.619838	0.518971	0.714489	0.749546	0.636471	0.133265	0	0	0.053008	0.377675	0.0433512
L2c	fibroblast	1	0.85974	0.833471	0.642493	0.658155	0.831374	0.842814	0.827848	0.830509	0.461948	0	0	0.336471	0.754365	0.319111
L2b	fibroblast	1	0.874098	0.834596	0.59662	0.62076	0.815566	0.820659	0.810383	0.817137	0.413766	0	0	0.29974	0.73813	0.293978
L1PA2	fibroblast	1	0.943436	0.928635	0.699147	0.55472	0.880117	0.906693	0.907133	0.920979	0.231178	0	0	0.0851931	0.884852	0.128414
AluSq	fibroblast	1	0.826862	0.859717	0.560684	0.509916	0.767616	0.706867	0.756779	0.691118	0.235517	0	0	0.0892234	0.66937	0.100088
L1MC5a	fibroblast	1	0.84937	0.834287	0.542768	0.555688	0.808112	0.778939	0.782376	0.764054	0.296571	0	0	0.21192	0.72655	0.164269
ERVL.E.int	fibroblast	1	0.518552	0.903614	0.320169	0.421481	0.668636	0.568793	0.628564	0.797636	0.155067	0	0	0.239393	0.592515	0.120295
LTR81B	fibroblast	1	0.260373	0.341465	0.11173	0.199381	0.282669	0.208967	0.367998	0.506978	0	0	0	0.161013	0.312833	0.0253835
L1MA3	fibroblast	1	0.870085	0.722498	0.519269	0.431078	0.620836	0.792145	0.700724	0.737462	0.274322	0	0	0.233696	0.689581	0.159725
AluSc8	fibroblast	1	0.845118	0.910432	0.583871	0.548144	0.820632	0.762816	0.810492	0.71188	0.300504	0	0	0.113221	0.748636	0.11437
MIRc	fibroblast	1	0.897811	0.789095	0.584353	0.597122	0.787672	0.787873	0.775755	0.8195	0.435453	0	0	0.34522	0.721224	0.304913
LTR49.int	fibroblast	0.718098	1	0.600185	0.299059	0.295916	0.478736	0.745123	0.529954	0.705021	0.0898188	0	0	0.137792	0.530061	0.0583317
LTR12	fibroblast	0	1	0.351668	0.137414	0.134034	0.371519	0.176758	0.301325	0.295179	0.109381	0	0	0.443626	0.155516	0.16324
L1MD1	fibroblast	1	0.852733	0.681378	0.474314	0.407192	0.583168	0.741711	0.644384	0.734582	0.202821	0	0	0.214348	0.697161	0.116573
THE1B	fibroblast	1	0.692557	0.62944	0.35898	0.333921	0.544193	0.62489	0.510219	0.638136	0.243135	0	0	0.154708	0.526064	0.118019
AluSq2	fibroblast	1	0.905095	0.901348	0.651085	0.597899	0.836301	0.8014	0.822937	0.777776	0.325411	0	0	0.194754	0.753981	0.217381
MSTD	fibroblast	1	0.855263	0.621327	0.330957	0.385727	0.522865	0.586956	0.532594	0.609888	0.23488	0	0	0.306936	0.564116	0.105823
L1PB1	fibroblast	1	0.943625	0.857142	0.697107	0.615633	0.805782	0.950599	0.838515	0.964298	0.425118	0	0	0.26973	0.885375	0.27881
AluJr	fibroblast	1	0.919471	0.93267	0.698706	0.681379	0.891478	0.860976	0.877369	0.840209	0.409016	0	0	0.275798	0.815023	0.317185
L1MA4A	fibroblast	1	0.92142	0.736892	0.553347	0.437658	0.636816	0.87587	0.695147	0.872115	0.269384	0	0	0.259971	0.827705	0.153843
MLT2B1	fibroblast	0.448516	1	0.37426	0.193866	0.278961	0.391936	0.366211	0.39886	0.428388	0.192579	0	0	0.0496262	0.439819	0.0985157
AluSx	fibroblast	1	0.882543	0.924637	0.686346	0.654197	0.867022	0.819602	0.851788	0.799858	0.418356	0	0	0.25262	0.805484	0.292536
MER57.int	fibroblast	1	0.948828	0.348302	0.131845	0.230025	0.361329	0.483702	0.443811	0.495857	0.370247	0	0	0.405157	0.263428	0.0626236
L1MB1	fibroblast	1	0.738479	0.63068	0.415922	0.397988	0.501018	0.631543	0.542252	0.663955	0.147492	0	0	0.133826	0.570306	0.0814945
L3	fibroblast	1	0.779997	0.825997	0.550147	0.577584	0.793461	0.816038	0.783618	0.81885	0.358357	0	0	0.244296	0.721132	0.228453
L1PB3	fibroblast	1	0.603956	0.566866	0.337613	0.278059	0.480016	0.595393	0.519541	0.639763	0.117036	0	0	0.0574656	0.553199	0.0702566
L1MB8	fibroblast	1	0.827101	0.758991	0.511585	0.540871	0.735487	0.773204	0.727964	0.74731	0.346185	0	0	0.255013	0.671099	0.193932
L1MEf	fibroblast	1	0.950885	0.858339	0.614615	0.515804	0.696099	0.993967	0.773433	0.890464	0.344802	0	0	0.175765	0.77133	0.182086
L1PA13	fibroblast	1	0.812426	0.735378	0.488633	0.450075	0.696556	0.792945	0.678242	0.840378	0.221078	0	0	0.171306	0.689239	0.140475
L1ME1	fibroblast	1	0.892791	0.83154	0.648024	0.598547	0.791168	0.898	0.804891	0.846624	0.398472	0	0	0.290156	0.752685	0.229285
LTR49	fibroblast	0.816718	1	0.68925	0.17555	0.292355	0.442932	0.483409	0.640458	0.642466	0	0	0	0.0350883	0.448355	0.0257821
L1PA17	fibroblast	1	0.72798	0.788728	0.425723	0.359561	0.740686	0.846515	0.720833	0.823612	0.0481697	0	0	0.117538	0.58371	0.0863876
MLT1A0	fibroblast	0.976801	1	0.585117	0.314617	0.411914	0.520906	0.547998	0.538426	0.626362	0.319807	0	0	0.252161	0.541897	0.136825
LTR32	fibroblast	0.505065	0.39498	0.835026	0.125416	0.399955	0.696658	0.613762	0.784503	1	0.499086	0	0	0.330132	0.573757	0.154498
MLT2C1	fibroblast	1	0.530405	0.211027	0.177862	0.211167	0.305348	0.355269	0.287231	0.371468	0.109189	0	0	0.124087	0.257731	0.0597427
MIR	fibroblast	1	0.897707	0.863054	0.692093	0.682223	0.853499	0.861882	0.849195	0.86746	0.507442	0	0	0.398194	0.802659	0.395285
L1ME4c	fibroblast	1	0.969821	0.716851	0.44402	0.365708	0.710036	0.768288	0.683423	0.767798	0.222964	0	0	0.126799	0.560054	0.119832
L1ME2	fibroblast	1	0.878816	0.811856	0.562799	0.508154	0.723409	0.871401	0.781932	0.872716	0.232134	0	0	0.175232	0.754887	0.175161
L1MA2	fibroblast	1	0.798429	0.815525	0.590752	0.501591	0.717322	0.877938	0.765235	0.84123	0.328623	0	0	0.260108	0.705697	0.133898
L1MB3	fibroblast	1	0.88899	0.779028	0.526407	0.529688	0.686459	0.827455	0.734033	0.785386	0.33789	0	0	0.213959	0.700746	0.18205
L1MC3	fibroblast	0.943072	1	0.723461	0.452503	0.441056	0.770365	0.793619	0.713552	0.836256	0.187145	0	0	0.191857	0.686078	0.143574
MER4B	fibroblast	1	0.668687	0.517084	0.173209	0.153782	0.213449	0.232217	0.257496	0.396972	0.169591	0	0	0.0559236	0.191305	0.0507583
THE1A	fibroblast	0.416753	1	0.356401	0.144824	0.144547	0.250691	0.271836	0.257863	0.272351	0.0861418	0	0	0.0631983	0.196087	0.058765
LTR40A1	fibroblast	0	1	0.373106	0.171332	0.075424	0.293804	0.640147	0.40627	0.172615	0	0	0	0.173395	0.550213	0.0781236
LTR8B	fibroblast	1	0.745224	0.302073	0.135122	0.263783	0.287575	0.290401	0.305129	0.533595	0.108755	0	0	0.284108	0.278338	0.0649527
MER11C	fibroblast	0.503144	1	0.267553	0.168753	0.22136	0.249206	0.255217	0.306386	0.351439	0.136227	0	0	0.109162	0.315902	0.087815
MLT1E1A	fibroblast	1	0.852283	0.470656	0.209149	0.209286	0.381397	0.298744	0.352369	0.388022	0.129871	0	0	0.0867021	0.428965	0.0849337
MIR3	fibroblast	1	0.799731	0.801281	0.605188	0.6143	0.809185	0.773744	0.782639	0.808655	0.385015	0	0	0.331816	0.732486	0.315255
LTR7	fibroblast	1	0.353697	0.38955	0.146494	0.13444	0.261344	0.239242	0.321434	0.269113	0.14455	0	0	0.0195509	0.286085	0.0246846
LTR26	fibroblast	0.214869	1	0.0921102	0.0475077	0.0393115	0.0823204	0.0809411	0.099653	0.187434	0.0640995	0	0	0	0.0712114	0.0657054
MER4A	fibroblast	0.708639	1	0.456557	0.143452	0.225131	0.187768	0.282294	0.243632	0.44444	0.0885563	0	0	0.0391817	0.233804	0.0908782
AluSz6	fibroblast	1	0.863683	0.910156	0.636455	0.613433	0.848607	0.80276	0.829877	0.757182	0.328929	0	0	0.183946	0.76303	0.191031
L1ME3E	fibroblast	1	0.988937	0.74944	0.440496	0.470735	0.714095	0.789269	0.747825	0.998612	0.200811	0	0	0.0985388	0.821952	0.0842946
MSTB1	fibroblast	0.895747	1	0.650807	0.297936	0.319831	0.473241	0.551807	0.43143	0.630071	0.150198	0	0	0.1479	0.474062	0.0885945
L1PA8	fibroblast	0.96499	1	0.931404	0.558656	0.525018	0.878689	0.829007	0.837999	0.863225	0.264998	0	0	0.130446	0.774061	0.108361
L1MDa	fibroblast	1	0.867127	0.756562	0.536028	0.422191	0.601468	0.754413	0.709779	0.768973	0.298943	0	0	0.186211	0.692308	0.139816
L1MEd	fibroblast	1	0.963769	0.835979	0.581944	0.550294	0.779085	0.926113	0.803248	0.870782	0.338184	0	0	0.23744	0.778074	0.178727
L1M5	fibroblast	1	0.851588	0.867393	0.657445	0.617104	0.833269	0.889996	0.845177	0.853079	0.343798	0	0	0.282883	0.799281	0.226212
MLT1J	fibroblast	1	0.863186	0.627316	0.383738	0.391631	0.544802	0.582312	0.576971	0.630393	0.293491	0	0	0.21008	0.568626	0.139817
AluJr4	fibroblast	1	0.854872	0.865491	0.567106	0.562868	0.816311	0.767085	0.809969	0.739595	0.262569	0	0	0.185749	0.703762	0.205529
AluSg4	fibroblast	1	0.878557	0.881368	0.478429	0.485116	0.771831	0.689157	0.766194	0.660319	0.222787	0	0	0.0707406	0.711443	0.201856
THE1D	fibroblast	1	0.666559	0.648809	0.304067	0.252951	0.457568	0.570807	0.511635	0.60795	0.223808	0	0	0.0824746	0.460454	0.124058
LTR33	fibroblast	1	0.665541	0.786922	0.266356	0.311749	0.508676	0.487904	0.519007	0.611183	0.114589	0	0	0.166479	0.444242	0.126993
MER66.int	fibroblast	0.687609	1	0.407168	0.144712	0.250024	0.288418	0.335982	0.451278	0.121605	0.244124	0	0	0	0.155346	0.116507
AluSx4	fibroblast	1	0.853294	0.904127	0.528671	0.514683	0.801989	0.702831	0.784033	0.686127	0.175987	0	0	0.0466429	0.680057	0.08406
MER67B	fibroblast	1	0.919283	0.447277	0.0789665	0.105805	0.16908	0.184088	0.401905	0.3153	0.385492	0	0	0.0915058	0.309941	0.157992
L1PA3	fibroblast	0.989112	1	0.90906	0.683916	0.618961	0.899358	0.925494	0.903865	0.970021	0.382052	0	0	0.194967	0.934878	0.189508
L1ME4b	fibroblast	1	0.832052	0.753212	0.490581	0.503664	0.723642	0.763902	0.72297	0.754738	0.330062	0	0	0.213609	0.672037	0.166643
MER4.int	fibroblast	0.8576	0.792309	0.910857	0.39036	0.391763	0.689674	0.808348	0.695932	0.882307	0.519725	0	0	0.0687896	1	0.0826248
L1MD2	fibroblast	0.921795	1	0.757704	0.524723	0.457317	0.759412	0.85352	0.714193	0.788275	0.203827	0	0	0.125974	0.681992	0.162758
LTR88c	fibroblast	1	0	0.675265	0.242386	0.161989	0.477324	0.609659	0.437178	0.564407	0.302503	0	0	0	0.333314	0.419618
MLT2D	fibroblast	0.642914	1	0.523933	0.264625	0.206289	0.393377	0.532606	0.367416	0.650002	0.214234	0	0	0.166878	0.641071	0.113929
MER66B	fibroblast	1	0.628004	0.227384	0.152206	0.303712	0.301542	0.227816	0.334506	0.325108	0.289563	0	0	0.0760127	0.324306	0.0493367
LTR10D	fibroblast	1	0.156765	0.343036	0.188064	0.155625	0.334875	0.369899	0.331897	0.404479	0	0	0	0.0258395	0.248442	0.0671989
L1PA6	fibroblast	1	0.786711	0.690225	0.47012	0.444705	0.615889	0.712492	0.665724	0.727858	0.250188	0	0	0.185065	0.707376	0.181816
L1MCa	fibroblast	1	0.856102	0.707186	0.463501	0.40927	0.56594	0.670783	0.627463	0.693341	0.285677	0	0	0.248003	0.691531	0.115736
L1PA11	fibroblast	0.864091	1	0.727929	0.426734	0.410358	0.626391	0.707699	0.634787	0.76312	0.15296	0	0	0.130328	0.636578	0.110134
MER21C	fibroblast	1	0.693915	0.501156	0.284464	0.373525	0.492246	0.503094	0.504211	0.561632	0.148699	0	0	0.136715	0.390684	0.11722
L1PA7	fibroblast	1	0.85145	0.827929	0.648688	0.580988	0.773517	0.922672	0.779458	0.905462	0.325419	0	0	0.3127	0.796556	0.237205
MLT1F2	fibroblast	1	0.749113	0.649812	0.289735	0.326282	0.368853	0.436781	0.451902	0.432825	0.302588	0	0	0.269591	0.46948	0.16601
MLT1A0.int	fibroblast	1	0.827931	0.585766	0.245345	0.279504	0.305646	0.645355	0.493092	0.508005	0.0981174	0	0	0	0.44317	0.115059
LTR17	fibroblast	1	0.97353	0.688707	0.246779	0.294187	0.412526	0.363859	0.439026	0.375843	0.112923	0	0	0.13596	0.456749	0.0289757
LTR78B	fibroblast	1	0.175015	0.255842	0.103898	0.164856	0.251492	0.170582	0.256261	0.368935	0.114977	0	0	0	0.250083	0.0583694
CR1.L3A_Croc	fibroblast	1	0.449304	0.119042	0.0326506	0.0752198	0.115097	0.105309	0.128572	0.264686	0	0	0	0	0.0513787	0.0312095
MLT1G3	fibroblast	0.912938	0.693829	0.920784	0.414125	0.327281	0.555469	0.710883	0.596016	1	0.281852	0	0	0.178237	0.566273	0.0956357
MSTA	fibroblast	1	0.874078	0.676688	0.294397	0.409869	0.541887	0.599036	0.589506	0.673549	0.280153	0	0	0.254603	0.605429	0.119418
L1ME2z	fibroblast	1	0.698388	0.57502	0.328187	0.327162	0.519229	0.644304	0.531425	0.602882	0.12436	0	0	0.125832	0.453446	0.0869162
AluYc3	fibroblast	1	0.693293	0.765923	0.354032	0.374603	0.633929	0.637178	0.678078	0.581607	0.249746	0	0	0.0160684	0.457061	0.0210328
MLT1B	fibroblast	1	0.723698	0.691238	0.450105	0.427203	0.648223	0.695905	0.639144	0.811303	0.199756	0	0	0.210241	0.581485	0.142882
THE1B.int	fibroblast	0.986923	1	0.246711	0.1239	0.265874	0.280796	0.305779	0.290374	0.291026	0.0980493	0	0	0.201883	0.208317	0.0986421
AluSx3	fibroblast	1	0.880302	0.891897	0.595536	0.575024	0.830532	0.749815	0.812254	0.738705	0.33918	0	0	0.16086	0.751187	0.158101
L1ME3B	fibroblast	0.948596	1	0.714407	0.484561	0.425455	0.698354	0.758304	0.709386	0.738373	0.209426	0	0	0.13413	0.619004	0.115981
THE1C	fibroblast	0.715403	1	0.582686	0.31337	0.331806	0.473572	0.569325	0.474716	0.557175	0.126526	0	0	0.111615	0.436419	0.0894207
MLT1F	fibroblast	1	0.76817	0.602204	0.329721	0.349023	0.438841	0.517525	0.508115	0.729152	0.265095	0	0	0.159367	0.617275	0.124809
L1MEg	fibroblast	0.993926	1	0.863322	0.573035	0.501714	0.775088	0.921363	0.788086	0.879707	0.31325	0	0	0.281454	0.788226	0.159811
HERVL.int	fibroblast	0.974902	1	0.580435	0.280353	0.354961	0.406627	0.686329	0.475458	0.608916	0.344697	0	0	0.113531	0.341882	0.0966637
L1P1	fibroblast	0.772028	1	0.582371	0.333074	0.399047	0.582552	0.751811	0.628062	0.639492	0.131175	0	0	0.114331	0.519385	0.0983864
L1MB7	fibroblast	1	0.860839	0.823044	0.61522	0.593328	0.766524	0.830447	0.777336	0.825196	0.34452	0	0	0.238249	0.733976	0.210709
AluSg7	fibroblast	1	0.832885	0.81303	0.426977	0.460208	0.709683	0.612721	0.689556	0.637121	0.217141	0	0	0.0439838	0.613351	0.0791633
THE1C.int	fibroblast	0.637374	1	0.202926	0.0871378	0.178829	0.219266	0.249957	0.246728	0.294352	0.14417	0	0	0.095605	0.102534	0.0895881
LTR43	fibroblast	1	0.136099	0.362975	0.206102	0.220066	0.183189	0.331845	0.212091	0.316396	0	0	0	0	0.171956	0.0326255
L1MEc	fibroblast	1	0.833218	0.883641	0.629082	0.591831	0.772027	0.871326	0.799729	0.884131	0.309228	0	0	0.253893	0.79689	0.193602
L1M3a	fibroblast	1	0.615485	0.41176	0.448166	0.356349	0.394085	0.460164	0.441421	0.580426	0.769851	0	0	0.399426	0.350793	0.190217
L1MC5	fibroblast	1	0.913629	0.847126	0.582783	0.513216	0.770859	0.831405	0.797362	0.766681	0.288506	0	0	0.13337	0.705195	0.165089
L1MB4	fibroblast	0.990589	1	0.724537	0.457102	0.478029	0.641686	0.746562	0.670413	0.726143	0.213355	0	0	0.120136	0.666685	0.132317
L1ME3F	fibroblast	1	0.838755	0.76912	0.471561	0.446875	0.661103	0.739751	0.702283	0.795228	0.13115	0	0	0.08861	0.796206	0.167197
MLT1O	fibroblast	0.485672	1	0.383465	0.176352	0.195226	0.314042	0.315946	0.315993	0.339704	0.103187	0	0	0.0825611	0.301371	0.0445803
MSTB.int	fibroblast	0.592015	1	0.397225	0.11956	0.317489	0.211564	0.222052	0.336798	0.320416	0.535199	0	0	0.152035	0.263767	0.0783094
LTR12C	fibroblast	0.493843	0.318826	0.165713	0.12091	0.243214	0.130519	0.115253	0.172833	0.212256	0.412631	0	0	0.647544	0.293959	1
MER11B	fibroblast	0.556147	1	0.309892	0.0853934	0.189974	0.250343	0.229772	0.227204	0.401547	0.0765907	0	0	0	0.300173	0.0211011
MLT1D	fibroblast	1	0.923768	0.685486	0.321378	0.462759	0.547584	0.636227	0.568857	0.618611	0.367534	0	0	0.21138	0.574553	0.154901
L1MEg2	fibroblast	1	0	0.675847	0.237737	0.356587	0.447754	0.506276	0.545839	0.512657	0.0919128	0	0	0.079455	0.150435	0.0391414
L1MA5	fibroblast	0.645473	0.567893	0.451976	0.321516	0.270538	0.452231	0.934547	0.467098	1	0.142466	0	0	0.0913466	0.567954	0.0444506
L1ME3	fibroblast	1	0.864484	0.734635	0.392079	0.427246	0.63203	0.710875	0.649818	0.69812	0.172152	0	0	0.134928	0.616831	0.112211
MER65A	fibroblast	1	0.724568	0.375131	0.271932	0.230419	0.303587	0.265917	0.361292	0.337797	0.154025	0	0	0.0495976	0.176224	0.0861181
L1M1	fibroblast	0.963867	1	0.836244	0.626933	0.557606	0.710063	0.977864	0.746965	0.839215	0.861684	0	0	0.2222	0.872042	0.834777
L1ME3C	fibroblast	1	0.539633	0.495529	0.279727	0.279966	0.454482	0.493302	0.512133	0.586034	0.152147	0	0	0.058364	0.394848	0.0668414
HERVK22.int	fibroblast	0.847385	0.323814	0.461102	0.514917	0.460733	1	0.603929	0.646289	0.965469	0.077869	0	0	0.137828	0.330654	0.560853
MLT2B3	fibroblast	1	0.639614	0.500021	0.426591	0.334257	0.474373	0.521606	0.483607	0.880982	0.525621	0	0	0.466558	0.664792	0.251338
LTR86C	fibroblast	0.93868	0.894128	1	0.128006	0	0.516832	0.599335	0.406109	0.839141	0	0	0	0	0.688823	0.0133855
ERVL.B4.int	fibroblast	1	0.671235	0.550862	0.286716	0.493791	0.537586	0.774141	0.577841	0.804626	0.290836	0	0	0.339322	0.713981	0.271757
LTR40a	fibroblast	0.527389	1	0.345587	0.224153	0.237963	0.394904	0.454646	0.448052	0.48794	0.240378	0	0	0.145384	0.311163	0.127891
L1M2	fibroblast	1	0.992956	0.836602	0.600364	0.514372	0.721975	0.900231	0.732946	0.872361	0.217582	0	0	0.170848	0.815866	0.153646
LTR16B	fibroblast	0.222144	1	0.206549	0.178478	0.0876483	0.100761	0.144462	0.145076	0.196815	0.142775	0	0	0.0447081	0.287565	0.00973011
L1PREC2	fibroblast	1	0.992855	0.786439	0.483187	0.516974	0.78764	0.898084	0.748201	0.89784	0.290925	0	0	0.165844	0.679057	0.127022
MER39	fibroblast	1	0.881277	0.745745	0.267344	0.379897	0.569369	0.563883	0.594883	0.737512	0.120757	0	0	0.0357958	0.627695	0.0914567
L4_A_Mam	fibroblast	1	0.902042	0.687557	0.319587	0.412982	0.706562	0.622403	0.615825	0.761797	0.260883	0	0	0.113463	0.55944	0.110727
L1MA4	fibroblast	0.922097	1	0.873935	0.64468	0.54703	0.741939	0.874345	0.788366	0.854512	0.267937	0	0	0.26822	0.726836	0.140371
FLAM_C	fibroblast	1	0.872727	0.819275	0.569178	0.611494	0.898366	0.74513	0.823772	0.790921	0.28727	0	0	0.129085	0.719841	0.159434
MER21.int	fibroblast	0.898251	1	0.485545	0.245124	0.191877	0.311673	0.751453	0.471338	0.472337	0.0833884	0	0	0.123878	0.384233	0.0531899
L1M3	fibroblast	0.737705	1	0.716868	0.401802	0.353866	0.640673	0.702234	0.59899	0.70416	0.182887	0	0	0.112513	0.531157	0.103251
LTR108a_Mam	fibroblast	0	0	0.269443	0.142874	0	0.071439	1	0.173671	0.304313	0	0	0	0	0	0.164051
HERVE_a.int	fibroblast	1	0	0	0.105019	0.0797236	0.169766	0.129905	0.122301	0.115772	0	0	0	0	0.108734	0.123224
MLT1E1	fibroblast	0.759313	1	0.221948	0.163832	0.109735	0.135872	0.128318	0.176371	0.271593	0.0688948	0	0	0.121416	0.21877	0.0167048
L1MA1	fibroblast	0.978138	1	0.685848	0.504425	0.466626	0.648921	0.791807	0.7307	0.819412	0.324952	0	0	0.137574	0.612629	0.111027
L1PA15.16	fibroblast	1	0.760565	0.507882	0.33177	0.266518	0.378213	0.760363	0.416339	0.690299	0.195622	0	0	0.300198	0.441603	0.35167
L1M4c	fibroblast	1	0.915321	0.835652	0.500721	0.511742	0.715708	0.908532	0.817684	0.848588	0.277054	0	0	0.197967	0.609411	0.112862
L1MA5A	fibroblast	1	0.801066	0.626044	0.33377	0.376173	0.53403	0.613077	0.543569	0.649415	0.0916947	0	0	0.171618	0.57346	0.0911619
L4_C_Mam	fibroblast	1	0.847373	0.545882	0.325981	0.383595	0.584584	0.557704	0.538607	0.607413	0.117731	0	0	0.129723	0.493655	0.0931099
THE1A.int	fibroblast	1	0.219088	0.260101	0.121444	0.242801	0.209422	0.20418	0.225986	0.308564	0.308175	0	0	0.167322	0.188883	0.136163
HAL1ME	fibroblast	1	0.632203	0.579093	0.372368	0.340362	0.584433	0.729479	0.623023	0.639796	0.112567	0	0	0.0944513	0.590181	0.119145
MER31B	fibroblast	0.587379	1	0.43889	0.193394	0.188528	0.329153	0.332383	0.351139	0.546981	0.0627164	0	0	0	0.391543	0.083027
HERVK11.int	fibroblast	0.529826	1	0.213964	0.0564486	0.135684	0.113687	0.239178	0.161181	0.373237	0.0515443	0	0	0.0552336	0.26595	0.0439904
HUERS.P1.int	fibroblast	0.34725	1	0.383928	0.123272	0.198647	0.266271	0.323179	0.337873	0.363808	0.0626883	0	0	0.110828	0.446942	0.0213896
L1PA14	fibroblast	1	0.676476	0.653098	0.46886	0.388017	0.641321	0.813125	0.67642	0.834391	0.185628	0	0	0.132653	0.639789	0.144408
MLT1L	fibroblast	0.914423	1	0.631106	0.442279	0.389654	0.586218	0.631545	0.591456	0.780647	0.167361	0	0	0.155246	0.5978	0.157411
MLT1I	fibroblast	1	0.79206	0.471767	0.27837	0.324987	0.534511	0.541316	0.548852	0.69303	0.35004	0	0	0.236858	0.475899	0.0709543
L1ME4a	fibroblast	1	0.876456	0.807994	0.590464	0.578865	0.818188	0.863883	0.8138	0.838612	0.349181	0	0	0.2248	0.746957	0.194265
HERV9.int	fibroblast	0.705796	1	0.120048	0.0677727	0.115944	0.133859	0.165089	0.0830134	0.12423	0.317974	0	0	0	0.297071	0.098862
MSTB2	fibroblast	0.983886	1	0.59961	0.277342	0.340953	0.48967	0.627	0.459083	0.69032	0.280903	0	0	0.0512081	0.398918	0.0878344
L1PBa	fibroblast	0.887664	1	0.82571	0.593533	0.478599	0.674433	0.916733	0.675982	0.975779	0.249846	0	0	0.209264	0.752199	0.185751
AluYb8	fibroblast	0.995616	0.874584	1	0.418959	0.544938	0.971565	0.737895	0.809459	0.807668	0.111293	0	0	0	0.887261	0.0556941
AluYm1	fibroblast	1	0.785975	0.855805	0.411694	0.429416	0.725106	0.648457	0.723052	0.620447	0.126245	0	0	0.0244618	0.632462	0.0536225
AluYa5	fibroblast	0.912221	0.89482	0.860993	0.459428	0.483726	0.873085	1	0.857939	0.93454	0.16829	0	0	0.0240608	0.786535	0.132302
LTR56	fibroblast	1	0.897039	0.554399	0.203027	0.143988	0.317925	0.474016	0.390904	0.504591	0.136908	0	0	0.107585	0.263215	0.0811764
L1ME3G	fibroblast	1	0.881996	0.785709	0.446895	0.481512	0.716648	0.75656	0.730589	0.751874	0.231955	0	0	0.14504	0.66189	0.157896
LFSINE_Vert	fibroblast	0.819252	0.372084	0.668482	0.309551	0.419933	1	0.650079	0.590759	0.930883	0.312423	0	0	0.0494657	0.658437	0.11135
HERVL18.int	fibroblast	0.464735	0	0.0404634	0.111314	0.0747637	0.0946231	0	0.128589	0	0.719453	0	0	1	0.10939	0.114449
L1P2	fibroblast	1	0.861062	0.680269	0.456484	0.320135	0.553494	0.624674	0.615709	0.705889	0.380617	0	0	0.132325	0.631843	0.107084
MLT1H1	fibroblast	1	0.489827	0.803864	0.649777	0.43511	0.585782	0.676079	0.931902	0.561851	0.0908535	0	0	0.12036	0.355666	0.0787386
L1M4	fibroblast	1	0.869283	0.798987	0.568566	0.51888	0.726896	0.82957	0.75386	0.781841	0.332315	0	0	0.24078	0.751786	0.184081
L1M4b	fibroblast	0.95145	0.810735	0.822878	0.488153	0.452297	0.638446	0.835899	0.714579	1	0.275976	0	0	0.220614	0.735408	0.191454
L1MB2	fibroblast	1	0.889642	0.693981	0.450382	0.463749	0.601446	0.749866	0.669849	0.775955	0.289508	0	0	0.214304	0.630455	0.150738
MLT2F	fibroblast	1	0.488396	0.222837	0.130465	0.116223	0.141194	0.203844	0.132067	0.26429	0.352993	0	0	0.244379	0.160718	0.0644006
LTR27C	fibroblast	0.330633	1	0.292243	0.0894724	0.241535	0.311282	0.30556	0.329609	0.579745	0	0	0	0	0.250858	0.0905278
L1PA12	fibroblast	0.657052	1	0.314799	0.143591	0.203501	0.290744	0.349318	0.3165	0.456153	0.0947693	0	0	0.0894501	0.293803	0.0512621
LTR41	fibroblast	1	0.534444	0.333317	0.161127	0.187519	0.343101	0.36989	0.377189	0.676515	0.106376	0	0	0	0.427367	0.0544409
HERVK.int	fibroblast	0.218325	0.725908	0.436161	0.214088	0.61796	0.243464	0.667135	0.608919	0.698797	0.837001	0	0	0.17046	1	0.0936363
L1MD3	fibroblast	1	0.922338	0.822089	0.405778	0.37865	0.634717	0.782447	0.673304	0.875617	0.19861	0	0	0.132767	0.754128	0.106316
ERV3.16A3_I.int	fibroblast	0.4824	1	0.329134	0.126339	0.196103	0.214158	0.226063	0.278635	0.446096	0.214854	0	0	0.180434	0.27343	0.0425309
L1PA5	fibroblast	1	0.938832	0.802889	0.544404	0.540499	0.774508	0.796794	0.784577	0.78359	0.313384	0	0	0.168798	0.797194	0.209939
L1MA7	fibroblast	0.83212	1	0.674363	0.417049	0.433567	0.590594	0.69859	0.627866	0.752856	0.187945	0	0	0.115739	0.657042	0.0868089
MIR1_Amn	fibroblast	1	0.900495	0.596226	0.322122	0.381566	0.562085	0.487613	0.522918	0.736283	0.268619	0	0	0.0948927	0.460859	0.135058
MER61.int	fibroblast	0.712751	0.903223	0.821779	0.445372	0.365831	0.743311	1	0.713259	0.881802	0.168989	0	0	0.0502924	0.630548	0.0651138
LTR86B2	fibroblast	0.366839	1	0.129145	0.0566812	0.131556	0.0618348	0.201745	0.14645	0.0887835	0.193668	0	0	0	0.112464	0.0228868
L1MA6	fibroblast	1	0.965541	0.866315	0.532027	0.482795	0.736668	0.941716	0.773251	0.850698	0.372553	0	0	0.192081	0.855492	0.162969
LTR1E	fibroblast	1	0	0	0.0707593	0.209979	0.116344	0.311317	0.0418507	0.0780192	0.397675	0	0	0	0.24676	0.026979
L1PB2	fibroblast	0.855772	1	0.790492	0.453234	0.435427	0.75727	0.862377	0.768829	0.847905	0.191851	0	0	0.163132	0.629443	0.0968728
MER4A1_	fibroblast	0.943176	0	0.615485	0.155056	0.13245	0.419347	0.409296	0.596398	0.961506	0.511574	0	0	0	1	0.308588
MLT1J2	fibroblast	1	0.970152	0.509051	0.252847	0.234788	0.426092	0.397982	0.39584	0.635763	0.180689	0	0	0.211919	0.418555	0.0614681
L1MCb	fibroblast	1	0.300901	0.612473	0.435217	0.272306	0.574038	0.813014	0.569013	0.683452	0.119828	0	0	0.134205	0.583534	0.089912
LTR3A	fibroblast	0.551818	0	1	0.348699	0.309804	0.31393	0.493598	0.414677	0.865812	0.181242	0	0	0.169671	0.46534	0.0344896
LTR45	fibroblast	0	0	0	0	0.882178	0.821569	0	0.258758	1	0	0	0	0	0	0.158901
LTR40c	fibroblast	0	0	0.337924	0.342526	0.610517	0.564544	0.614237	0.657398	1	0	0	0	0	0.765801	0.233692
LTR8	fibroblast	1	0.656428	0.603373	0.436201	0.385466	0.450844	0.453173	0.537571	0.512354	0.410592	0	0	0.192989	0.467967	0.220711
LTR18A	fibroblast	1	0	0	0.021266	0.0790906	0.0406507	0.0519955	0.0920437	0	0	0	0	0	0	0.0307152
L1MEb	fibroblast	0.941213	0.947931	0.825438	0.376058	0.38745	0.691402	0.815314	0.781174	1	0.217057	0	0	0.107267	0.74701	0.0980702
LTR1B1	fibroblast	0	0	0	0.546848	0	0.317197	0.471445	0.564085	0.995851	0	0	0	0	1	0.287809
L1PB4	fibroblast	1	0.780773	0.746186	0.565654	0.479106	0.747701	0.893123	0.746065	0.824799	0.276163	0	0	0.214699	0.813555	0.150723
L1ME3A	fibroblast	1	0.868092	0.794706	0.485499	0.484686	0.72588	0.794605	0.734488	0.815611	0.285074	0	0	0.239287	0.677508	0.150173
LTR50	fibroblast	1	0.327768	0.587022	0.293585	0.481537	0.615765	0.632677	0.64857	0.917622	0.790893	0	0	0.37817	0.679502	0.148774
LTR1B0	fibroblast	0.823024	0	1	0.170601	0.152246	0.387508	0.248074	0.328654	0.288869	0	0	0	0.33545	0	0
MER52.int	fibroblast	0.282038	0	0.0806233	0.33787	0.231417	0.417946	1	0.493484	0.69259	0	0	0	0.23887	0.502838	0.0310307
MER70C	fibroblast	1	0	0.0888046	0.350601	0.315473	0.173247	0.29602	0.240267	0.233947	0.543211	0	0	0	0.114254	0
L1MA8	fibroblast	1	0.992106	0.789023	0.474902	0.458715	0.652105	0.790903	0.702912	0.834072	0.297351	0	0	0.196478	0.661953	0.14971
L1PA15	fibroblast	1	0.958189	0.889383	0.631584	0.563413	0.828433	0.942251	0.85124	0.964912	0.330386	0	0	0.213768	0.830254	0.146504
L1MC	fibroblast	1	0.89806	0.698781	0.517544	0.464459	0.630265	0.780408	0.687415	0.6819	0.203572	0	0	0.0795364	0.648523	0.110653
L1PA16	fibroblast	0.963843	1	0.806623	0.535022	0.510235	0.723705	0.839527	0.747938	0.772329	0.30331	0	0	0.216397	0.743137	0.221537
MLT1E2	fibroblast	1	0.667721	0.401388	0.198947	0.249652	0.340542	0.386237	0.374242	0.624345	0.174454	0	0	0.243232	0.361501	0.116036
MamGypLTR1b	fibroblast	0.341928	0.387406	0.418131	0.369056	0.184999	0.561352	0.646871	0.462248	1	0.103487	0	0	0	0.556159	0.0161972
LTR85a	fibroblast	0	1	0.269099	0.114987	0.153475	0.278771	0.224079	0.214957	0.263769	0.141108	0	0	0.108161	0.42173	0
HERVH.int	fibroblast	1	0.681559	0.676035	0.174346	0.341445	0.586077	0.626963	0.639394	0.700626	0.131313	0	0	0.171633	0.612301	0.100009
LTR33B	fibroblast	1	0.579236	0.18712	0.0463965	0.270538	0.381963	0.454878	0.358918	0.332512	0	0	0	0	0.519251	0.023817
LTR9D	fibroblast	0.528398	1	0.590355	0.282267	0.170185	0.521041	0.214134	0.585096	0.76214	0	0	0	0.0744793	0.591386	0.0420064
LTR14B	fibroblast	0	1	0.885698	0.273325	0.269475	0.196138	0.193852	0.291123	0.464869	0.389862	0	0	0.221956	0.276228	0.10187
MER51A	fibroblast	1	0.512671	0.488103	0.381663	0.159878	0.252215	0.975956	0.334874	0.68591	0.164475	0	0	0.0267882	0.306446	0.107084
MLT2A1	fibroblast	0.460808	1	0.58577	0.325384	0.242142	0.513884	0.788751	0.480799	0.617938	0.214647	0	0	0.0885602	0.582259	0.112234
LTR104_Mam	fibroblast	0.947042	0.404781	0.530981	0.241808	0.370037	0.547788	0.648076	0.613467	1	0.305679	0	0	0	0.501926	0.173854
MER52C	fibroblast	0.474543	0.930573	0.130136	0.248474	0.217025	0.153756	0.182377	0.406417	1	0.583015	0	0	0	0	0.0467798
HERVL40.int	fibroblast	1	0.400518	0.365085	0.180678	0.180115	0.190237	0.323943	0.22058	0.298771	0.21116	0	0	0.0555168	0.399506	0.00855032
L1MCc	fibroblast	1	0.750514	0.54086	0.303471	0.319119	0.477833	0.515349	0.487065	0.72978	0.150418	0	0	0.126352	0.438531	0.0937545
L4_B_Mam	fibroblast	1	0.630276	0.732754	0.32047	0.33428	0.590006	0.500031	0.567489	0.617622	0.272956	0	0	0.220392	0.56119	0.149496
LOR1.int	fibroblast	0.896472	0.358232	0.640291	0.249063	0.297824	0.594199	0.655413	0.612738	0.720326	0.241404	0	0	0.263052	1	0.140005
MLT2B5	fibroblast	1	0	0	0.040172	0.118248	0.182908	0	0.100275	0	0	0	0	0	0	0
MER39B	fibroblast	0.820885	1	0.279033	0.145458	0.224997	0.167211	0.224854	0.255026	0.320421	0.241208	0	0	0.0522544	0.350221	0.0629249
MER65.int	fibroblast	0.807297	0.499694	1	0.288098	0.339667	0.912715	0.826997	0.796841	0.693754	0.140841	0	0	0.0373884	0.524642	0.0900969
MER31A	fibroblast	1	0.540669	0.379263	0.174378	0.262294	0.402138	0.426702	0.393097	0.447541	0	0	0	0.0393763	0.420844	0.163145
MLT1N2	fibroblast	1	0.859618	0.665619	0.257272	0.299509	0.516949	0.580675	0.578735	0.569843	0.310376	0	0	0.0989863	0.411734	0.0894891
LTR10C	fibroblast	1	0.509323	0.468161	0.213099	0.306297	0.565786	0.37109	0.523484	0.710618	0.293122	0	0	0.134769	0.242304	0.0700865
L1M7	fibroblast	1	0.44322	0.673023	0.446358	0.37072	0.687636	0.716098	0.64211	0.830641	0.164376	0	0	0.0836385	0.464417	0.0700187
LTR89	fibroblast	0.642765	0.794868	0.819765	0.278804	0.507222	0.642329	0.516072	0.6347	1	0.126522	0	0	0.11774	0.343657	0.0959708
MSTB1.int	fibroblast	0	0	0.797285	0.339903	0.0486917	0.30333	1	0.543198	0.52984	0	0	0	0.472423	0.137917	0
MER41B	fibroblast	1	0.716173	0.652384	0.234641	0.263208	0.442979	0.414359	0.549423	0.584848	0.245939	0	0	0.0831828	0.453525	0.112421
Plat_L3	fibroblast	1	0.559458	0.659373	0.301388	0.300742	0.625047	0.560406	0.535101	0.765879	0.427981	0	0	0.0831627	0.477917	0.122385
MLT1A	fibroblast	0.960284	1	0.768871	0.350188	0.430765	0.609029	0.698652	0.623157	0.834705	0.255953	0	0	0.299438	0.439794	0.135625
Alu	fibroblast	1	0.559509	0.461642	0.19688	0.250324	0.508405	0.469925	0.52724	0.478743	0.176795	0	0	0.132619	0.444294	0.0720655
MLT1E1A.int	fibroblast	0	0	1	0	0	0.652973	0	0.742283	0	0	0	0	0	0	0.967726
LTR16C	fibroblast	1	0.687161	0.752435	0.294111	0.366715	0.468915	0.616487	0.476085	0.909112	0.433854	0	0	0.177437	0.563575	0.131529
MamRep1527	fibroblast	0.581595	1	0.343718	0.217297	0.369744	0.361206	0.306003	0.430435	0.728968	0.145961	0	0	0	0.529642	0.105488
LTR12F	fibroblast	1	0.222816	0.475504	0.270087	0.542778	0.982703	0.21636	0.642706	0.919626	0.101072	0	0	0	0.50155	0.050088
AluYj4	fibroblast	0.983626	1	0.961669	0.354294	0.478622	0.716753	0.619123	0.651161	0.585541	0.161198	0	0	0.0229435	0.638502	0.0503301
FLAM_A	fibroblast	1	0.913989	0.898687	0.529197	0.575065	0.965328	0.783268	0.851719	0.857961	0.192472	0	0	0.123317	0.74462	0.117168
L1PB	fibroblast	1	0.677371	0.613767	0.288337	0.29915	0.466898	0.6942	0.485632	0.743565	0.23134	0	0	0	0.54861	0.0518057
AluSc5	fibroblast	1	0.820778	0.827195	0.39439	0.418144	0.67872	0.609443	0.664173	0.610509	0.108842	0	0	0.0588291	0.536885	0.0643465
HAL1M8	fibroblast	1	0.916659	0.627732	0.371403	0.331899	0.620233	0.656454	0.582957	0.626793	0.294405	0	0	0.08261	0.534035	0.110013
LTR103b_Mam	fibroblast	0	0	1	0.447437	0.48627	0.498793	0.692874	0.620036	0.534987	0	0	0	0.306895	0.994805	0.123863
MLT1H2	fibroblast	0.772666	1	0.516452	0.286893	0.248188	0.436844	0.470178	0.434027	0.439542	0.158702	0	0	0.0975713	0.54953	0.111069
MER4D1	fibroblast	1	0.332565	0.576368	0.21099	0.21221	0.332976	0.394098	0.390217	0.409135	0.0562893	0	0	0.103958	0.334801	0.0458742
MER4CL34	fibroblast	1	0.893443	0.368646	0.0902109	0.198243	0.233654	0.272719	0.245586	0.214424	0.0795415	0	0	0.138722	0.380077	0.0440377
L5	fibroblast	0.999148	1	0.505896	0.195608	0.319956	0.772133	0.696034	0.640821	0.97251	0.248069	0	0	0.0803646	0.292317	0.0711651
MLT1H	fibroblast	1	0.598006	0.599313	0.259696	0.320732	0.497866	0.474143	0.431734	0.663129	0.49199	0	0	0.230834	0.496669	0.221813
FAM	fibroblast	1	0.660535	0.631689	0.307246	0.383945	0.657968	0.480409	0.570204	0.560831	0.0787166	0	0	0.0899913	0.43629	0.0583657
MER65D	fibroblast	0	1	0.318995	0.105383	0.169844	0.224033	0.197979	0.241828	0.124863	0	0	0	0	0.406341	0.0611629
LTR37A	fibroblast	0.40013	1	0.567854	0.375999	0.222471	0.583574	0.581303	0.478933	0.772003	0.0922194	0	0	0.0447365	0.562119	0.0431458
AluYh3	fibroblast	1	0.877586	0.839902	0.333792	0.416444	0.660892	0.5097	0.621304	0.620065	0.0401468	0	0	0	0.601408	0.0241304
MER31.int	fibroblast	1	0.207962	0.301865	0.159049	0.198668	0.374123	0.418977	0.441578	0.268293	0.0417018	0	0	0.309299	0.286865	0.0312192
MER92.int	fibroblast	1	0.412687	0.371635	0.131921	0.176876	0.37388	0.352364	0.32794	0.568574	0.0565228	0	0	0.150199	0.28376	0.0254881
MER34A	fibroblast	0.686829	1	0.507867	0.140997	0.407477	0.539637	0.463149	0.487236	0.736033	0.236515	0	0	0.239933	0.617839	0.170983
MSTA1	fibroblast	1	0.458511	0.257528	0.276976	0.275239	0.293153	0.499837	0.37554	0.232682	0.260796	0	0	0.133503	0.199111	0.0277267
MER4A1	fibroblast	1	0.238221	0.595783	0.271719	0.281146	0.408192	0.568663	0.675869	0.456281	0.0723995	0	0	0.039919	0.489198	0.15951
AluYc	fibroblast	1	0.90084	0.901569	0.374135	0.471677	0.72156	0.631876	0.701542	0.630594	0.111905	0	0	0.0354754	0.620627	0.0562876
AluYf1	fibroblast	0.902903	1	0.862879	0.398651	0.402892	0.742044	0.492873	0.667951	0.57014	0.12475	0	0	0.0402238	0.53514	0.0295026
L1MC4a	fibroblast	1	0.908134	0.730429	0.425674	0.493971	0.673071	0.763026	0.687666	0.785851	0.293064	0	0	0.171857	0.673744	0.142009
LTR9B	fibroblast	0.733824	1	0.421443	0.136547	0.195945	0.40821	0.266827	0.539462	0.504511	0.0634309	0	0	0.16465	0.564843	0.0879821
MER4E1	fibroblast	1	0.7337	0.491948	0.16553	0.156657	0.325314	0.281659	0.290039	0.394458	0.13197	0	0	0.0622581	0.439248	0.0542
MLT1E3	fibroblast	1	0.79752	0.627041	0.238861	0.36391	0.479696	0.524045	0.548786	0.829104	0.251746	0	0	0.211403	0.548713	0.0872967
LTR37B	fibroblast	1	0.600449	0.533924	0.303871	0.281527	0.544054	0.68676	0.558965	0.825764	0.0772982	0	0	0.0530096	0.701164	0.087146
LTR39	fibroblast	1	0.718638	0.529455	0.244966	0.411586	0.458926	0.55764	0.600297	0.654229	0.413995	0	0	0.133437	0.562879	0.0420254
L1ME3D	fibroblast	0.950007	1	0.780297	0.564177	0.35723	0.602731	0.687832	0.67837	0.742682	0.153267	0	0	0.0758019	0.555786	0.0625872
L1P4	fibroblast	0.807966	1	0.579169	0.279754	0.363958	0.568423	0.692357	0.562235	0.634199	0.0770943	0	0	0.0576786	0.560227	0.0665225
LTR22C2	fibroblast	0.834745	1	0	0	0.0340065	0.0240377	0	0.0195195	0.264284	0	0	0	0	0.291723	0.116433
L1PA10	fibroblast	1	0.87697	0.73561	0.477073	0.44979	0.682932	0.76389	0.702969	0.816958	0.233477	0	0	0.155733	0.680596	0.137778
ERVL.int	fibroblast	0.5333	0.763085	1	0.383524	0.646933	0.628685	0.610319	0.741836	0.527543	0.320638	0	0	0.222757	0.278965	0.071894
MLT1H1.int	fibroblast	1	0	0.248214	0.108321	0.231672	0.377678	0.33319	0.36784	0.276163	0	0	0	0	0.173617	0
LTR64	fibroblast	0.739274	0.914698	0.61714	0.460397	0.986062	0.944533	0.496603	0.568819	0.257001	0	0	0	0.625886	1	0.0648027
MLT1F1	fibroblast	1	0.704354	0.519377	0.252415	0.291671	0.418163	0.401063	0.437418	0.576039	0.175151	0	0	0.115705	0.474663	0.0833495
FRAM	fibroblast	1	0.895495	0.820562	0.362661	0.543185	0.768898	0.594018	0.736571	0.669873	0.082507	0	0	0.156126	0.614951	0.0795047
MER67C	fibroblast	0.609853	1	0.272842	0.146629	0.127481	0.186317	0.253301	0.20851	0.342695	0.0524864	0	0	0.183631	0.296936	0.0355304
LTR67B	fibroblast	1	0.895392	0.476181	0.314431	0.387132	0.506493	0.673987	0.510866	0.815262	0.286622	0	0	0.142657	0.834137	0.153907
LTR79	fibroblast	0.744933	1	0.596445	0.32111	0.361268	0.586217	0.661099	0.460894	0.799686	0.347481	0	0	0.117461	0.577263	0.123607
L1M8	fibroblast	1	0.605167	0.996004	0.356163	0.375993	0.76368	0.853072	0.647565	0.821595	0.10566	0	0	0.162455	0.740676	0.0653586
MER41D	fibroblast	0.619936	0.716834	0.411174	0.0763804	0.322786	0.265453	0.364141	0.342291	0.460718	0.485374	0	0	0.173264	1	0.140246
MLT1A1	fibroblast	1	0.297671	0.585276	0.316974	0.404325	0.448203	0.549393	0.556982	0.69375	0.438849	0	0	0.071589	0.425017	0.142006
LTR78	fibroblast	0.845047	0.535348	0.786095	0.372305	0.507889	0.780101	0.83229	0.780329	1	0.511688	0	0	0.27048	0.77676	0.155797
LTR2C	fibroblast	0.449005	0.974744	0.484698	0.598355	0.395845	0.497964	0.557853	0.543683	1	0	0	0	0	0.448416	0.0684262
LTR57.int	fibroblast	0	0	0.374115	0.133454	0.651857	0.459776	0.432693	0.35529	0.171286	1	0	0	0	0.405074	0.0465584
HERVK9.int	fibroblast	1	0.219958	0.85821	0.323498	0.638526	0.489674	0.371922	0.555613	0.906501	0.145609	0	0	0.356215	0.578521	0.144152
MER9a2	fibroblast	1	0.248172	0.19916	0.226916	0.0942552	0.121691	0.0692958	0.172819	0.187362	0	0	0	0	0.125342	0.0426069
MER67A	fibroblast	0.794189	0	0.637273	0.448421	0.426482	0.437072	0.529806	0.533762	1	0.495882	0	0	0	0.378146	0.110103
HERV16.int	fibroblast	1	0.523588	0.181796	0.0224679	0.124071	0.0778808	0.0159192	0.126704	0.163696	0	0	0	0	0.275599	0.0693703
MLT1G1	fibroblast	1	0.516893	0.291398	0.170701	0.192857	0.272249	0.247444	0.254196	0.274083	0.184384	0	0	0.130101	0.325562	0.0865287
L1MD	fibroblast	1	0.822617	0.795179	0.500264	0.427074	0.691532	0.876766	0.704155	0.790523	0.228829	0	0	0.133738	0.619529	0.107191
LTR13A	fibroblast	0.375895	0	1	0.857683	0.416265	0.528704	0.469539	0.574269	0.478995	0.443257	0	0	0.20083	0.4807	0.631309
MER49	fibroblast	0.855396	1	0.270496	0.238818	0.22888	0.167627	0.253434	0.235828	0.445916	0.527601	0	0	0.327975	0.491262	0.0765508
MER50	fibroblast	0.980713	1	0.774815	0.425681	0.429869	0.627557	0.598946	0.636644	0.641485	0.413838	0	0	0.188751	0.576359	0.0788574
LTR46	fibroblast	1	0.377019	0.51236	0.308541	0.389312	0.195023	0.315107	0.267799	0.270288	0	0	0	0	0.482801	0.0170541
MER9a1	fibroblast	0	0	0.518137	0.479504	0.616183	0.375995	0.961289	0.280183	0.973392	1	0	0	0.299808	0.280375	0.248177
LTR13	fibroblast	1	0.624624	0.640939	0.393403	0.390855	0.353165	0.238973	0.464877	0.699717	0.294404	0	0	0.136496	0.39643	0.128272
LTR13_	fibroblast	0	1	0.192857	0.273572	0.303996	0.414143	0.316219	0.536794	0.18529	0.454286	0	0	0.236277	0.237088	0.0259381
MER54A	fibroblast	0.562605	1	0.397367	0.203683	0.186807	0.354747	0.379633	0.314693	0.460815	0	0	0	0.125766	0.270708	0.0837813
MER68	fibroblast	0.954072	1	0.833467	0.374448	0.57456	0.805145	0.745573	0.769293	0.918671	0.0966799	0	0	0.0938488	0.451303	0.0950122
L3b	fibroblast	0.87403	1	0.676821	0.350269	0.414935	0.750694	0.751681	0.64444	0.845863	0.148768	0	0	0.113576	0.618596	0.123872
MER4B.int	fibroblast	0.934419	1	0.449444	0.147581	0.269456	0.419074	0.457544	0.393816	0.547438	0.136892	0	0	0.0348261	0.458431	0.0323725
AluYe5	fibroblast	0.987391	1	0.816045	0.301982	0.471265	0.735887	0.574254	0.671135	0.508532	0.0811847	0	0	0.0532907	0.643911	0.0531696
AluSq4	fibroblast	1	0.92577	0.907268	0.339645	0.416492	0.651397	0.598898	0.728919	0.625884	0.102582	0	0	0.0312996	0.593719	0.0321266
MER66C	fibroblast	0.202944	0.874133	0.393807	0.2991	0.298147	0.385894	0.23842	0.447094	0.636161	1	0	0	0.167998	0.210459	0.0377323
AluYk11	fibroblast	0.173147	1	0.608608	0.248619	0.277862	0.442199	0.458472	0.402859	0.096689	0.179824	0	0	0.0467589	0.230298	0.0653422
AluYh9	fibroblast	1	0	0.102224	0.047086	0	0.0810781	0.094963	0.0691684	0.205998	0	0	0	0	0	0
MER74B	fibroblast	0.548163	1	0.34664	0.156194	0.266913	0.477768	0.388203	0.384947	0.523338	0	0	0	0.243489	0.277604	0.0116621
LTR2B	fibroblast	0.619414	0.991377	1	0.682054	0.324824	0.318348	0.256688	0.572677	0.265694	0	0	0	0	0.269204	0.0402485
Harlequin.int	fibroblast	0.978217	1	0.851011	0.467837	0.355488	0.585707	0.725993	0.747265	0.77861	0.327397	0	0	0.299546	0.637196	0.13441
LTR75	fibroblast	0.374069	0.635637	0.563209	0.301358	0.273304	0.581865	0.517474	0.368411	1	0	0	0	0.204501	0.41517	0.0559704
AluYa8	fibroblast	0.186554	0	0.307671	0.139525	0.0533141	0.265801	1	0.24199	0.443154	0.18055	0	0	0	0.334004	0.296999
LTR10A	fibroblast	1	0.397936	0.560596	0.25967	0.0957972	0.357677	0.331914	0.432719	0.782667	0.295097	0	0	0.300827	0.251648	0.0414313
HERV9N.int	fibroblast	0.499351	0	0.736735	0.376549	0.407236	1	0.884063	0.76862	0.636388	0	0	0	0	0.363592	0.0409674
AluYh3a3	fibroblast	1	0.106511	0.380389	0.145615	0.260504	0.362429	0.225588	0.287131	0.323288	0	0	0	0.0246371	0.346303	0.0418637
LTR7B	fibroblast	0.850325	1	0.496384	0.18134	0.222337	0.34372	0.393319	0.37915	0.399674	0.0580943	0	0	0.0731176	0.403738	0.0234654
AluYk3	fibroblast	1	0.609117	0.715292	0.267051	0.290602	0.584644	0.361495	0.501852	0.421468	0.0633115	0	0	0	0.529	0.0181913
MER52A	fibroblast	1	0.806331	0.283616	0.13772	0.227559	0.193328	0.152679	0.229411	0.197807	0.330986	0	0	0.183953	0.235204	0.455024
MER83	fibroblast	0.373655	1	0.929527	0.465719	0.42229	0.480134	0.667913	0.564127	0.423389	0.197086	0	0	0.459188	0.362053	0.0362657
LTR26B	fibroblast	1	0	0.736034	0.433151	0.223947	0.817308	0.752831	0.550049	0.284008	0.18254	0	0	0	0.213036	0.0113638
LTR42	fibroblast	1	0	0.245812	0.150838	0.136648	0.506461	0.346887	0.496813	0.553233	0.412679	0	0	0.200773	0.1067	0.0538312
MER4D	fibroblast	1	0.776567	0.477876	0.131648	0.159068	0.268256	0.276728	0.315195	0.24387	0.0389029	0	0	0.139976	0.359614	0.0289503
L1M4a2	fibroblast	0.587653	1	0.607983	0.326009	0.317682	0.469995	0.653553	0.52637	0.668511	0.12792	0	0	0.0638465	0.572681	0.101138
MER65B	fibroblast	0.538008	1	0.121066	0.0225748	0.0631016	0.0986974	0.0342427	0.0584045	0.14269	0.336591	0	0	0	0.138344	0
AluYi6	fibroblast	0.870895	0.657291	0.77328	0.551819	0.580709	1	0.397052	0.828678	0.653179	0	0	0	0	0.279981	0.0341753
AluYk2	fibroblast	1	0.849393	0.495657	0.223611	0.216479	0.295266	0.317031	0.332412	0.205592	0.0353779	0	0	0	0.266351	0.00885805
L1M4a1	fibroblast	0.850978	1	0.677827	0.346718	0.381067	0.543705	0.723196	0.592373	0.674398	0.0683854	0	0	0.132705	0.599665	0.118306
X7A_LINE	fibroblast	1	0.169633	0.534801	0.290408	0.362495	0.596393	0.51149	0.64233	0.625176	0.170514	0	0	0.194585	0.359939	0.0536713
LTR16E1	fibroblast	0.353803	1	0.266337	0.186054	0.234032	0.281206	0.199029	0.335194	0.556426	0.245585	0	0	0.0411926	0.307683	0.0809932
ERV3.16A3_LTR	fibroblast	0.0754832	0.279083	0.108492	0.128598	0.101508	0.063636	0.0742232	0.101696	0.152876	1	0	0	0	0.0900805	0
MSTB	fibroblast	1	0.809181	0.516807	0.19036	0.293941	0.38516	0.478675	0.432772	0.533713	0.205869	0	0	0.117235	0.362971	0.123678
LTR18B	fibroblast	0	1	0.260226	0.129137	0.0636069	0.244136	0.0711667	0.423429	0.5207	0.614567	0	0	0	0.424215	0.0681448
LTR81	fibroblast	0	0	0.318817	0.103925	0.366595	0.536512	0	0.44635	1	0	0	0	0	0.313949	0
MER74A	fibroblast	1	0.968465	0.788508	0.200939	0.405415	0.484133	0.779341	0.586771	0.656165	0.065218	0	0	0.102743	0.421874	0.0612118
LTR52	fibroblast	1	0.228243	0.233723	0.197488	0.198018	0.244992	0.598378	0.29789	0.478614	0	0	0	0.0479805	0.366827	0.0395591
MLT.int	fibroblast	1	0.501605	0.564506	0.0952099	0.153595	0.260795	0.264191	0.229609	0.180117	0.50421	0	0	0.105602	0.108618	0
AmnSINE2	fibroblast	1	0.468948	0.370883	0.227368	0.161751	0.303626	0.273512	0.394558	0.338579	0	0	0	0.125981	0.444351	0.126268
MamRTE1	fibroblast	0.79421	1	0.644149	0.340896	0.368064	0.624203	0.587595	0.605247	0.723957	0.241031	0	0	0.0691152	0.500106	0.110024
LTR81C	fibroblast	1	0	0.218678	0.0589341	0.0143413	0.13003	0.0886221	0.133362	0.0954874	0.418398	0	0	0.13259	0	0.0469758
LTR41C	fibroblast	1	0.578909	0.391207	0.124353	0.209058	0.272842	0.211541	0.332622	0.437133	0.0747065	0	0	0.226433	0.419273	0.042096
MER34C_	fibroblast	0.618031	0	0.385499	0.214994	0.167278	0.316544	0.243775	0.416992	1	0.45527	0	0	0	0.442452	0.0914512
MER34	fibroblast	1	0.929401	0.692673	0.22583	0.305497	0.49771	0.378201	0.563072	0.930603	0.217102	0	0	0	0.686024	0.0974041
LTR19A	fibroblast	1	0.354237	0.279529	0.169967	0.230738	0.27157	0.424371	0.265267	0.308624	0	0	0	0.104262	0.401926	0.167128
MER89	fibroblast	1	0.35111	0.444246	0.35336	0.440967	0.544747	0.953723	0.494814	0.650481	0.432256	0	0	0.265038	0.842628	0.10342
AmnSINE1	fibroblast	0.678941	0.755338	0.697631	0.62767	0.278582	0.871101	0.833758	0.807333	1	0.156809	0	0	0.128404	0.541859	0.0484505
LTR27B	fibroblast	0	0	1	0.0782671	0.397164	0.486239	0	0.339076	0.39315	0	0	0	0	0.372793	0.572091
LTR106_Mam	fibroblast	0.499317	0.387317	0.676427	0.34884	0.352701	0.462659	0.442458	0.514798	1	0	0	0	0	0.676284	0.0208702
MLT1H.int	fibroblast	0.516384	0	1	0.200836	0.1189	0.432895	0.283398	0.706004	0.687969	0	0	0	0.129278	0.458699	0.197346
MLT2B4	fibroblast	0.987692	0.705717	0.692243	0.277744	0.321044	0.530767	0.704697	0.422725	1	0.304071	0	0	0.377551	0.74133	0.156189
LTR40b	fibroblast	1	0.51253	0.579875	0.278853	0.260988	0.355741	0.547741	0.466368	0.520457	0.240597	0	0	0.110495	0.425642	0.108604
AluYg6	fibroblast	1	0.711111	0.552847	0.251707	0.333192	0.537983	0.316336	0.529846	0.47584	0.068387	0	0	0	0.357866	0.0210395
L1ME3Cz	fibroblast	1	0.907816	0.773162	0.520746	0.470996	0.694654	0.844662	0.737371	0.836895	0.244551	0	0	0.172473	0.65201	0.150814
L1MA10	fibroblast	0.912695	1	0.862139	0.410583	0.424283	0.714174	0.805161	0.691371	0.958058	0.123684	0	0	0.168872	0.632124	0.0720407
L1MC2	fibroblast	1	0.971079	0.949158	0.482626	0.454862	0.723662	0.789381	0.739229	0.753891	0.148631	0	0	0.134699	0.658079	0.115366
L1MEh	fibroblast	1	0.761712	0.591804	0.22383	0.293069	0.44236	0.576121	0.478373	0.588411	0.178817	0	0	0.057338	0.603223	0.096808
LTR10B2	fibroblast	0	1	0.428828	0.172871	0.177726	0.263432	0.400906	0.220009	0.265563	0	0	0	0	0.114078	0.0337607
LTR21C	fibroblast	0	0	1	0	0	0	0	0	0	0	0	0	0	0	0
LTR62	fibroblast	0.463326	1	0.110035	0.0545252	0.049179	0.160779	0.12576	0.201918	0.18797	0	0	0	0.118446	0.149313	0.0164474
MER34C2	fibroblast	0.459967	1	0.180553	0.0830297	0.09449	0.17737	0.133951	0.236626	0.334374	0.250903	0	0	0	0.263129	0.00632582
LTR5B	fibroblast	0	0.646105	0.893141	0.603076	0.599152	0.460423	0.659322	1	0.672572	0.0852149	0	0	0.176199	0.322035	0.016291
LTR45C	fibroblast	1	0.57628	0.148926	0.110971	0.108189	0.219779	0.289037	0.207957	0.237464	0.184651	0	0	0.0417957	0.26657	0.0224562
LTR8A	fibroblast	1	0.318499	0.258898	0.14425	0.149171	0.221339	0.143043	0.214812	0.2777	0	0	0	0.110726	0.144894	0.0429414
LTR38	fibroblast	0	1	0.155945	0.12668	0.0481255	0.190596	0.200996	0.122893	0.125048	0.0982716	0	0	0	0.0581887	0
LTR38.int	fibroblast	0	1	0.38897	0.0824116	0.296456	0.196452	0.339238	0.252497	0.402345	0	0	0	0	0.427227	0
HERVK13.int	fibroblast	0	1	0.597882	0.0755405	0.169852	0.226937	0.176962	0.284351	0.264026	0	0	0	0	0.66444	0.176001
LTR3B_	fibroblast	0.980355	0	0.681153	0.382796	0.822302	0.819324	0.391054	1	0.444164	0	0	0	0.905285	0.866137	0.065254
L1MEi	fibroblast	0.873841	1	0.729164	0.439811	0.420819	0.677467	0.89569	0.701189	0.827749	0.085931	0	0	0.0785391	0.656933	0.116846
MER77	fibroblast	1	0.651524	0.421039	0.181177	0.295679	0.435583	0.394941	0.401164	0.765316	0.42761	0	0	0.145861	0.484736	0.0847782
MER77B	fibroblast	0.876923	1	0.470839	0.168324	0.271268	0.383236	0.488392	0.410486	0.656021	0.196449	0	0	0.276508	0.478445	0.0924212
LTR33C	fibroblast	0.648761	0	0.68287	0.459589	0.447384	0.659622	0.667385	0.770198	0.408251	0	0	0	0.482508	1	0.267266
LTR85c	fibroblast	1	0	0.455784	0.43874	0.31576	0.485896	0.68593	0.609217	0.787346	0.243281	0	0	0	0.447289	0.0657126
LTR105_Mam	fibroblast	0.655136	0	0.283465	0.153231	0.19857	0.294243	0.126923	0.372962	1	0	0	0	0	0.360172	0.143429
MLT2B2	fibroblast	0.351616	1	0.373764	0.247937	0.12377	0.288992	0.339615	0.30211	0.282269	0.0704171	0	0	0.158834	0.18414	0.0824827
MER92B	fibroblast	1	0.300131	0.167043	0.104296	0.129388	0.151096	0.121362	0.19928	0.171826	0.11869	0	0	0	0.124768	0.0313628
LTR10E	fibroblast	1	0.703774	0.213197	0.018484	0.179547	0.176235	0.046352	0.242592	0.125542	0	0	0	0.421886	0.167495	0.0495558
LTR16E2	fibroblast	1	0.717016	0.591447	0.378542	0.436863	0.588387	0.661535	0.581636	0.558921	0.257005	0	0	0.238156	0.592455	0.132733
L1ME5	fibroblast	1	0.774934	0.562394	0.276754	0.40039	0.485028	0.564343	0.524666	0.691815	0.454769	0	0	0.160975	0.561267	0.266369
HAL1b	fibroblast	1	0.848056	0.611708	0.317522	0.345713	0.559178	0.622379	0.589705	0.717506	0.206257	0	0	0.0891917	0.567724	0.113872
MER21B	fibroblast	1	0.681893	0.489775	0.255138	0.24944	0.392342	0.438763	0.373224	0.472754	0.234863	0	0	0.0923171	0.383602	0.0674757
LTR24C	fibroblast	1	0.597742	0.567902	0.209455	0.316247	0.366647	0.411193	0.366094	0.535227	0.272815	0	0	0	0.213584	0.0769429
MSTC	fibroblast	1	0.463057	0.699972	0.284802	0.271103	0.407477	0.501898	0.47053	0.778573	0.166571	0	0	0.136388	0.508645	0.100968
MLT1J1	fibroblast	1	0.930015	0.43361	0.142942	0.244781	0.392124	0.40231	0.36685	0.543127	0.223551	0	0	0.0641765	0.458727	0.0766822
MER21A	fibroblast	1	0.975201	0.533638	0.363718	0.430675	0.364679	0.507604	0.478149	0.56489	0.277406	0	0	0.137669	0.325894	0.089308
MLT2A2	fibroblast	0.524401	1	0.80028	0.454243	0.358063	0.542942	0.811869	0.612789	0.816285	0.274418	0	0	0.413729	0.640963	0.193553
MER48	fibroblast	1	0	0.403097	0.18514	0.213112	0.295291	0.342939	0.281653	0	0	0	0	0	0.540001	0.130569
LTR7A	fibroblast	0	0	0.302815	1	0	0.238461	0	0.198991	0	0	0	0	0	0	0
LTR53B	fibroblast	0	0	0.28251	0.119108	0.404719	0.361413	0.209025	0.228618	0.399888	0	0	0	1	0.601004	0
MER61B	fibroblast	0.439623	0.749166	0.635061	0.285003	0.355309	0.700592	0.981489	0.727196	1	0	0	0	0.401685	0.503378	0.0840554
LOR1a	fibroblast	0.727503	0.790291	0.620632	0.25697	0.272491	0.351312	0.567248	0.619039	1	0.254952	0	0	0.098979	0.428473	0.107054
LTR33A_	fibroblast	0.721278	1	0.388225	0.250379	0.22345	0.302012	0.433856	0.355516	0.34294	0.276448	0	0	0.0897412	0.28054	0.0836012
MER57B1	fibroblast	1	0.923342	0.356636	0.174638	0.213555	0.459147	0.385551	0.514283	0.396956	0	0	0	0.137028	0.337063	0.0620617
AluYh7	fibroblast	1	0	0.608031	0.455374	0.0804562	0.991362	0.367102	0.350789	0.67728	0	0	0	0	0.694259	0
LTR16A2	fibroblast	0.557154	1	0.838139	0.624215	0.361589	0.603111	0.589913	0.581246	0.450298	0.423056	0	0	0	0.484505	0.0944676
LTR53	fibroblast	1	0.728797	0.476561	0.120422	0.218197	0.257172	0.361843	0.347825	0.545519	0	0	0	0.124229	0.415176	0.0348378
MER90a	fibroblast	1	0.549543	0.367686	0.21432	0.124977	0.252576	0.455527	0.264611	0.289775	0.0980842	0	0	0.0495466	0.361168	0.0387454
LTR1A2	fibroblast	0.818607	1	0.332379	0.105903	0.141694	0.225203	0.271841	0.221025	0.458851	0.0552273	0	0	0.404341	0.253164	0.0594422
MER11A	fibroblast	0.520497	1	0.308195	0.233387	0.229616	0.399897	0.242168	0.31391	0.244459	0.0691331	0	0	0.123781	0.234632	0.0811683
LTR81AB	fibroblast	0	0	0.945746	0	0.876818	0.686531	0.963942	0.84266	1	0	0	0	0	0	0
MER61D	fibroblast	0.401131	1	0.151531	0.134928	0	0.16933	0.210638	0.169556	0.162048	0	0	0	0	0	0
MER61A	fibroblast	0.403115	0	0.730813	0.175958	0.332346	0.498214	0.270354	0.491763	0.263275	1	0	0	0	0.565377	0.175739
X7B_LINE	fibroblast	1	0	0.491831	0.364969	0.259696	0.453234	0.30071	0.3515	0.49227	0.163148	0	0	0.199671	0.379139	0.0988773
L1P3	fibroblast	1	0.772899	0.518609	0.290819	0.314487	0.476597	0.660544	0.507171	0.62998	0.169578	0	0	0.049657	0.617153	0.123979
CR1_Mam	fibroblast	0.336798	1	0.420047	0.233627	0.246112	0.517615	0.430469	0.448431	0.587808	0.0996719	0	0	0.0274566	0.461905	0.138677
LTR101_Mam	fibroblast	1	0.41927	0.532298	0.274245	0.314763	0.467733	0.469503	0.543123	0.640935	0	0	0	0	0.401113	0.182837
X6B_LINE	fibroblast	1	0	0.343509	0.11738	0.139603	0.36552	0.198634	0.319147	0.368133	0	0	0	0	0.337544	0.0394625
MLT1G	fibroblast	1	0.296121	0.460481	0.2348	0.27574	0.38914	0.420172	0.386377	0.459018	0.281168	0	0	0.136548	0.576312	0.081625
MER110	fibroblast	1	0	0.295409	0.0227693	0.204852	0.302534	0.295103	0.287731	0.289071	0	0	0	0	0.598592	0.135307
LTR66	fibroblast	1	0.733746	0.316425	0.192791	0.112523	0.306726	0.160513	0.345749	0.43287	0.518107	0	0	0.128678	0.278758	0.0309548
HERVL66.int	fibroblast	0	0	0.154732	0.161929	0.0378477	0.18469	0.0957855	0.0754295	0	0	0	0	1	0.076817	0
X6A_LINE	fibroblast	1	0.685632	0.58891	0.235836	0.375446	0.666866	0.563683	0.579577	0.80343	0.318015	0	0	0.131959	0.702262	0.0616575
MER54B	fibroblast	0.343686	0	0.353327	0.0292248	0.173796	0.364043	0.479952	0.463666	1	0	0	0	0.223854	0.170773	0
MER70A	fibroblast	1	0	0.371142	0.107014	0.173111	0.217087	0.172039	0.165246	0.398589	0.0742436	0	0	0.115737	0.105534	0.0664256
MLT1E	fibroblast	0.638886	0.59082	0.856218	0.5595	0.493548	0.402484	0.632361	0.305272	0.865654	1	0	0	0.63438	0.157738	0.2161
MamGypsy2.I	fibroblast	0.535401	1	0.610418	0.185032	0.543907	0.59843	0.62611	0.791983	0.73266	0.228033	0	0	0.199208	0.461271	0.0940661
MamGypsy2.LTR	fibroblast	0.731022	0	0.880644	0.158216	0.209435	0.72768	0.768946	0.566356	1	0.178761	0	0	0	0.324262	0.0374319
LTR90B	fibroblast	0.37058	0	0.551166	0.101439	0.33596	0.759772	0.480908	0.654796	0.766559	0	0	0	0	1	0.0864025
MamSINE1	fibroblast	1	0.677816	0.577205	0.347214	0.296557	0.550256	0.629803	0.514271	0.673983	0.104694	0	0	0.146511	0.530277	0.0853557
LTR16D	fibroblast	1	0.9121	0.241764	0.262633	0.169232	0.200977	0.25429	0.243211	0.254166	0.0977294	0	0	0	0.0869751	0.0788576
LTR24	fibroblast	0.158698	1	0.366898	0.142111	0.124859	0.208401	0.261498	0.256489	0.395363	0.124945	0	0	0	0.143905	0
LTR24B	fibroblast	0.669949	1	0.355911	0.0938221	0.1226	0.254462	0.213087	0.258462	0.236152	0	0	0	0.0936439	0.16538	0.0560104
MER57A1	fibroblast	0.447309	1	0.484289	0.196593	0.174985	0.355834	0.293001	0.434717	0.372816	0.187716	0	0	0.187439	0.450673	0.0576612
MLT1J.int	fibroblast	0.739205	1	0.387924	0.0522133	0.129043	0.267684	0.4069	0.437098	0.563938	0.138072	0	0	0	0.32297	0.07759
MER34.int	fibroblast	0.584619	1	0.644557	0.366312	0.275285	0.364927	0.590738	0.478945	0.423208	0	0	0	0	0.430509	0.0187751
MER70B	fibroblast	0	1	0.0866602	0.0226015	0.106488	0.120542	0.910587	0.224932	0	0	0	0	0.307774	0	0.244771
UCON49	fibroblast	0	1	0.0508535	0.0747199	0	0.157249	0.175729	0.0594542	0.161142	0	0	0	0	0	0
MamGypLTR1a	fibroblast	1	0.575854	0.269821	0.154967	0.148905	0.264426	0.163213	0.228893	0.416993	0	0	0	0.0982758	0.195645	0.0808978
L1MEj	fibroblast	1	0.509153	0.722928	0.398225	0.374368	0.541701	0.776634	0.570292	0.78378	0.179582	0	0	0.0688475	0.62862	0.105087
LTR23	fibroblast	1	0.756827	0.614481	0.147556	0.340112	0.296277	0.302771	0.299616	0.386551	0.216858	0	0	0.0819684	0.257487	0.0470262
ERV24_Prim.int	fibroblast	0.275977	1	0.211461	0.0476129	0.1368	0.183181	0.265415	0.235152	0.86335	0	0	0	0.19747	0.357036	0.103228
LTR23.int	fibroblast	0	0	0.170104	0.10714	0.144733	0.606661	0.825547	0.765049	0.763609	0	0	0	0	1	0
MER34B	fibroblast	0.547665	1	0.304875	0.136429	0.151431	0.247719	0.47034	0.321308	0.236441	0	0	0	0	0.276933	0.0326163
LTR54	fibroblast	1	0.22512	0.669266	0.207675	0.358434	0.419654	0.548597	0.431863	0.589937	0.0911253	0	0	0.0306614	0.197157	0.0947854
MER34C	fibroblast	1	0	0.0792623	0.0417644	0.113015	0.105551	0.157823	0.161906	0	0	0	0	0	0.0915841	0
LTR16A	fibroblast	1	0.600569	0.46157	0.20449	0.184953	0.330788	0.373542	0.302369	0.29727	0.490456	0	0	0.14891	0.338282	0.0779366
MER34A1	fibroblast	1	0.653201	0.430322	0.223677	0.328909	0.448379	0.498824	0.402556	0.329436	0	0	0	0	0.41778	0.113976
LTR16B2	fibroblast	1	0.350182	0.486301	0.325442	0.414919	0.462145	0.470402	0.467687	0.884786	0.222945	0	0	0.258542	0.687317	0.0479707
LTR33A	fibroblast	0.583186	1	0.397035	0.213629	0.241335	0.356385	0.263753	0.404291	0.436188	0.154288	0	0	0.130956	0.437469	0.175998
MER41A	fibroblast	1	0.895061	0.478439	0.279676	0.333266	0.567906	0.400625	0.490919	0.724695	0.300681	0	0	0.137384	0.581482	0.10686
MER4E	fibroblast	1	0.380634	0.357482	0.272217	0.208941	0.237954	0.477706	0.405577	0.417134	0.0972065	0	0	0.0436529	0.17203	0.0321556
MLT1C.int	fibroblast	0.414913	1	0.495343	0.135217	0.21215	0.33965	0.378664	0.385409	0.266502	0	0	0	0	0.418926	0.0280744
LTR16D2	fibroblast	0.193556	1	0.17714	0.0471007	0.174538	0.0957845	0.0331008	0.0333122	0	0.183888	0	0	0.0981446	0.120361	0
LTR16B1	fibroblast	0.584561	1	0.0958926	0.0693537	0.153817	0.255126	0.321839	0.217739	0.497489	0.266084	0	0	0.144194	0.238424	0.0132507
MLT1G1.int	fibroblast	0	0	0.692196	0.119644	0.451023	0.324154	0.460154	0.287783	0.291736	0.824299	0	0	0.170694	1	0.132161
LTR1C	fibroblast	0	0	0	0	0.478656	0.167698	0	0.203309	0	0	0	0	0	1	0
LTR41B	fibroblast	1	0.896217	0.256236	0.0879739	0.138374	0.201784	0.198352	0.268122	0.240438	0.109877	0	0	0.169545	0.161761	0.0724568
MLT1B.int	fibroblast	1	0.864431	0.382419	0.263073	0.358908	0.362693	0.540275	0.572129	0.377045	0.24205	0	0	0.173941	0.433554	0.0866028
AluSq10	fibroblast	0.884338	1	0.626813	0.226202	0.274769	0.447813	0.400804	0.451607	0.389635	0.0623461	0	0	0.0140965	0.40606	0.0254393
LTR19B	fibroblast	1	0	0.297199	0.0803039	0.0861214	0.135239	0.254207	0.223048	0.108623	0	0	0	0	0.177902	0.040282
LTR85b	fibroblast	0.619571	0.49918	0.760893	0.262917	0.334001	0.385156	0.357152	0.380212	0.961945	0	0	0	0.178954	1	0.158438
LTR71B	fibroblast	1	0	0.444593	0.167523	0.334445	0.377408	0.473116	0.456335	0.298758	0	0	0	0	0.193057	0.119701
LTR16D1	fibroblast	0	0	0.117063	0.0805529	0.454081	0.0749807	0.0697127	0.136838	0.222607	0.798888	0	0	0.615668	1	0.0680774
MER51E	fibroblast	1	0	0.588098	0.237958	0.303869	0.343051	0.542508	0.438123	0.328893	0	0	0	0	0.494953	0
LTR86A1	fibroblast	1	0.711237	0.846561	0.155454	0.293824	0.491966	0.8335	0.370383	0.232516	0	0	0	0.378258	0.445211	0.179332
LTR75_1	fibroblast	1	0	0.111304	0.137875	0.0280727	0.124031	0.233585	0.379488	0.609303	0	0	0	0	0.586931	0.0404301
MER72	fibroblast	0.706362	0	0.890869	0.367791	0.606976	0.509929	0.763475	0.663792	1	0.579711	0	0	0.25192	0.664814	0.159796
L2.3_Crp	fibroblast	0.530739	1	0.445103	0.194427	0.201532	0.318437	0.463645	0.429821	0.469295	0.0992506	0	0	0.0187926	0.363725	0.0930615
MLT1D.int	fibroblast	0.401823	1	0.356468	0.201126	0.215791	0.328134	0.487735	0.407691	0.618696	0.0248475	0	0	0.0852633	0.263067	0.0677507
MER52D	fibroblast	1	0.628051	0.382893	0.244064	0.187974	0.0898122	0.231374	0.232126	0.263542	0.419476	0	0	0.0991693	0.121546	0.0522629
LTR12E	fibroblast	0.183608	0.155713	0.115289	0.261784	0.552013	0.0409685	0.136376	0.169899	0.18194	1	0	0	0.389105	0.279801	0.300785
LTR21B	fibroblast	0	0	1	0.247816	0.37072	0.25331	0.43723	0.236951	0.946213	0	0	0	0	0	0
HERVFH21.int	fibroblast	1	0	0.572357	0.108433	0.500121	0.52535	0.598821	0.376317	0.288623	0	0	0	0.684981	0.305933	0.120843
AluYk4	fibroblast	0.999555	1	0.822048	0.284669	0.526846	0.621003	0.506812	0.764799	0.533378	0.0981181	0	0	0	0.632502	0.0758378
MER101	fibroblast	0	1	0.170506	0.140876	0.109548	0.0737285	0	0.0672722	0.193698	0	0	0	0.112852	0.184676	0.0623149
LTR36	fibroblast	1	0.674439	0.372442	0.17267	0.224624	0.499086	0.606769	0.457206	0.657384	0.0754915	0	0	0.103444	0.519377	0.0572139
MLT1M	fibroblast	0.820933	1	0.501117	0.211962	0.267651	0.57503	0.615985	0.563613	0.755881	0.0810758	0	0	0.21796	0.619195	0.0348761
LTR71A	fibroblast	1	0	0.903082	0.421259	0.277674	0.359237	0.260765	0.54896	0.436518	0	0	0	0	0.622898	0.0605471
Penelope1_Vert	fibroblast	0.559407	0.726029	0.472799	0.31741	0.210425	0.766683	0.608399	0.657639	1	0	0	0	0	0.797325	0.0609322
X9_LINE	fibroblast	0.52438	0.996751	0.722629	0.376115	0.475616	0.982703	0.912003	1	0.70703	0.651212	0	0	0	0.761264	0.22855
CR1.3_Croc	fibroblast	1	0.5183	0.170388	0.091372	0.170061	0.233846	0.254416	0.225029	0.336634	0.30823	0	0	0.0883286	0.329408	0.0996822
LTR86A2	fibroblast	1	0.46251	0.768564	0.312421	0.216965	0.361196	0.403315	0.454596	0.550648	0.214295	0	0	0.262281	0.286157	0.0458236
X5B_LINE	fibroblast	0	0	1	0	0.343935	0.181538	0	0.309617	0	0	0	0	0	0	0
Mam_R4	fibroblast	0.957419	0.669802	0.556131	0.215587	0.3468	0.640377	0.841154	0.560094	0.875183	0	0	0	0.0648272	1	0.120424
MLT2C2	fibroblast	1	0.907947	0.516768	0.144239	0.123161	0.195149	0.4398	0.181604	0.511918	0	0	0	0.121293	0.252946	0.0579684
CR1.16_AMi	fibroblast	0.831843	1	0.413982	0.158855	0.282705	0.385871	0.355178	0.28405	0.415327	0.336591	0	0	0	0.57611	0.0571535
LTR1F	fibroblast	1	0.953953	0.140831	0.110985	0.208329	0.152051	0.236547	0.0616234	0	0	0	0	0	0.334659	0
MER84	fibroblast	1	0	0.0961912	0.123085	0.274161	0.152712	0.23254	0.194677	0.131489	0.583682	0	0	0	0.128132	0.153494
MER84.int	fibroblast	0	0	0.456965	0.214832	0	0.286828	0	0.339406	1	0	0	0	0	0.721574	0
LTR29	fibroblast	1	0.709974	0.587028	0.284294	0.190625	0.398623	0.738903	0.389713	0.598952	0.327508	0	0	0.462339	0.507422	0.0558453
L1M	fibroblast	0.861259	1	0.864544	0.269175	0.401317	0.806653	0.567802	0.689681	0.471241	0.50794	0	0	0	0.499301	0.112971
MER51B	fibroblast	0.62647	0	0.697457	0.267694	0.464682	0.258733	0.258785	0.548634	0.529513	0	0	0	1	0.779357	0.0092474
LTR47A	fibroblast	1	0.162439	0.243964	0.13041	0.126763	0.167598	0.191726	0.240624	0.386165	0.375004	0	0	0.283623	0.243335	0.0485682
MER9a3	fibroblast	1	0.794616	0.445474	0.214474	0.272219	0.308565	0.287499	0.379561	0.439285	0.162792	0	0	0.497649	0.246516	0.0681482
LTR82A	fibroblast	0.42669	1	0.801266	0.408433	0.263186	0.741138	0.692408	0.745949	0.722041	0.622087	0	0	0.646612	0.597626	0.163621
LTR21A	fibroblast	0	0.407686	0.29932	0.133588	0.169492	0.17559	0.0545711	0.164275	0	1	0	0	0.188637	0.267752	0.0314596
LTR77	fibroblast	0	0	0.829932	0.350057	0.281439	0.406393	0	0.630358	1	0	0	0	0	0.848122	0.465348
LTR61	fibroblast	1	0.294767	0.284072	0.0984951	0.17461	0.177426	0.184869	0.257078	0.233243	0.13259	0	0	0	0.30703	0.00956079
MER4C	fibroblast	0	0	1	0.675991	0.459537	0.79951	0.978999	0.60725	0.798937	0	0	0	0.171376	0.258268	0.0875399
MER41E	fibroblast	1	0.480671	0.70979	0.929813	0.249472	0.706021	0.807256	0.414506	0.677886	0	0	0	0.383611	0.367811	0.0230778
AluYe6	fibroblast	1	0.872658	0.419596	0.0688255	0.474302	0.461222	0.291632	0.527916	0.534897	0	0	0	0	0.408916	0.0444435
HERVFH19.int	fibroblast	1	0.855895	0.684331	0.127452	0.235258	0.432378	0.480964	0.376603	0.379624	0	0	0	0.334293	0.320567	0.122979
MER110A	fibroblast	1	0	0.2743	0.0604922	0.184109	0.17623	0.19909	0.337005	0.147282	0	0	0	0.149875	0.20735	0.0764167
AluYd8	fibroblast	0.938433	1	0.700696	0.355014	0.535857	0.703173	0.429412	0.819602	0.73841	0.079825	0	0	0	0.706946	0
MER11D	fibroblast	0.940226	0.71994	0.985804	0.334506	0.195441	1	0.618374	0.600678	0.791909	0	0	0	0.448873	0.524477	0.157179
MamGypLTR3a	fibroblast	0.869686	0.456788	0.844159	0.223349	0.431157	0.610888	0.568115	0.488642	0.627798	0	0	0	0	1	0.0847161
LTR26E	fibroblast	1	0	0.274229	0.156445	0.233211	0.270957	0.593895	0.42601	0.156434	0	0	0	0.536408	0.107528	0.153117
X7C_LINE	fibroblast	1	0.741401	0.48648	0.35168	0.246615	0.383934	0.555809	0.519691	0.644766	0.397344	0	0	0	0.38277	0.0360428
LTR9	fibroblast	1	0.518776	0.371461	0.183814	0.227272	0.343246	0.343019	0.338366	0.614859	0.418533	0	0	0.0844947	0.442747	0.084507
LTR60B	fibroblast	0	1	0.0491509	0.0695421	0.0352149	0.0260815	0.060676	0.0825191	0.0885843	0	0	0	0	0.135411	0
LTR2	fibroblast	0.652562	1	0.599834	0.383288	0.293825	0.405358	0.53181	0.42502	0.419223	0.192518	0	0	0.332737	0.288962	0.26584
MER57C1	fibroblast	1	0	0.155239	0.0315499	0.0563682	0.0881215	0.104528	0.0459325	0.376787	0.228347	0	0	0.175321	0	0.0517989
AluYi6_4d	fibroblast	0.916256	0.342206	1	0.332329	0.304707	0.548006	0.360191	0.491816	0.580573	0	0	0	0	0.425298	0
LTR83	fibroblast	0.206952	1	0.427592	0.122925	0.13302	0.160902	0.240404	0.280426	0.498593	0	0	0	0	0.19229	0.0490619
LTR1D1	fibroblast	0.639275	1	0.258647	0.101176	0.0535939	0.100289	0.157065	0.154375	0.10354	0.0745043	0	0	0	0.0787909	0.0197876
LTR51	fibroblast	0.90566	0	0.780075	0.235899	0.366241	0.384854	0.438142	0.451631	0.600369	0	0	0	0	1	0.126019
X7D_LINE	fibroblast	0.806715	1	0.0567634	0.0742399	0.0194669	0.0793318	0.0309409	0.148794	0	0	0	0	0	0	0
LTR84a	fibroblast	0.291111	0.746285	0.939836	0.162164	0.305284	0.505292	0.581135	0.538124	1	0	0	0	0	0.300646	0.0250145
L2.1_AMi	fibroblast	0.537941	1	0.50872	0.301299	0.287665	0.39955	0.528606	0.522711	0.783795	0	0	0	0.325636	0.461781	0.0740022
LTR84b	fibroblast	0.307954	1	0.239186	0.11945	0.203404	0.337409	0.312839	0.247456	0.255058	0	0	0	0.0643944	0.445062	0.041433
LTR26C	fibroblast	1	0.686581	0.298121	0.199884	0.0760147	0.0888316	0.207827	0.149758	0.439949	0.207642	0	0	0.0536607	0.19534	0
CR1.8_Crp	fibroblast	0	0	0	0	0.210119	0.319827	0.42397	1	0	0	0	0	0	0	0
LTR16	fibroblast	1	0.604275	0.427384	0.174044	0.253977	0.292951	0.297809	0.300969	0.435314	0.103765	0	0	0.0827777	0.252732	0.0198808
LTR43B	fibroblast	1	0	0.0889047	0.143959	0.0884923	0.0764145	0.0684156	0.161306	0.111381	0	0	0	0	0.178942	0
HERVIP10FH.int	fibroblast	1	0.742732	0.80123	0.281957	0.257509	0.739976	0.543429	0.669405	0.667387	0.191989	0	0	0.169404	0.447462	0.0829877
LTR103_Mam	fibroblast	0.229423	1	0.553238	0.203931	0.417696	0.243868	0.501942	0.387177	0.348731	0.242884	0	0	0	0.218829	0.00369394
LTR47B2	fibroblast	0	0	0.539723	0	0.385251	0.414778	0.312519	0.434318	1	0	0	0	0	0.207772	0
ERV24B_Prim.int	fibroblast	0.424064	1	0.233459	0.104505	0.175985	0.210069	0.258119	0.286222	0.3384	0	0	0	0	0.361465	0.0793651
MER34B.int	fibroblast	1	0.949108	0.303149	0.121194	0.155344	0.25693	0.274189	0.298697	0.217975	0	0	0	0	0.144195	0.0565948
LTR75B	fibroblast	0	0	0.151214	0.24001	0	0.44531	0.302364	0.527784	1	0	0	0	0.725363	0.327292	0.0673522
LTR1C1	fibroblast	0	1	0.0664119	0.0712789	0	0.0277946	0.0356654	0.0460504	0	0.254495	0	0	0.31583	0.712168	0.150496
MLT2E	fibroblast	0	0.872436	0.219919	0.0726429	0.201465	0.0684982	0.161468	0.273219	0.184684	1	0	0	0.326564	0.272443	0.0553733
LTR65	fibroblast	1	0.513603	0.143425	0.141545	0.133051	0.143155	0.262531	0.21704	0.131782	0	0	0	0.231201	0.151509	0.0414414
LTR22B1	fibroblast	0	1	0.114718	0.292414	0.25212	0.0832494	0.430941	0.225939	0.238507	0.232193	0	0	0	0	0.0801914
MER68.int	fibroblast	1	0.637909	0.453597	0.338175	0.185293	0.467005	0.488298	0.525988	0.33154	0.157634	0	0	0.152817	0.245312	0.106691
LTR102_Mam	fibroblast	0	0.506822	1	0.282543	0.367916	0.711665	0.50291	0.593648	0.998862	0	0	0	0	0.44038	0.103041
LTR10F	fibroblast	1	0.932552	0.21241	0.0491129	0.0563354	0.174216	0.180219	0.258412	0.184769	0	0	0	0.0713196	0.212432	0.0446958
PRIMA4.int	fibroblast	0.891497	1	0.268943	0.111268	0.124542	0.148802	0.584027	0.207674	0.591137	0.264211	0	0	0.135948	0.508163	0.0236619
MER41G	fibroblast	0	0	0.580221	0.143618	0.352542	0.320695	0.190672	0.270926	0.963623	1	0	0	0	0	0
L1HS	fibroblast	0.690592	0.53907	0.647275	0.606238	0.419026	0.723806	1	0.791689	0.712694	0.181464	0	0	0.0206167	0.624439	0.25766
LTR44	fibroblast	0	0	0.608443	0.182679	0.0626068	0.375883	0.155555	0.520743	0.664897	0.428433	0	0	0	1	0.0214038
LTR45B	fibroblast	0.124446	1	0.0646542	0.0521921	0.0660894	0.110828	0.166559	0.111322	0.211236	0.0849599	0	0	0	0.0530141	0.00953656
MER57A.int	fibroblast	0.909722	1	0.537308	0.227422	0.217279	0.474975	0.470695	0.395808	0.323947	0.206582	0	0	0.0480724	0.375929	0.0783434
MER101.int	fibroblast	0.988976	1	0.547821	0.296534	0.308366	0.583687	0.722248	0.659446	0.811176	0.130709	0	0	0.12991	0.815832	0.0764063
L1M3f	fibroblast	1	0.953976	0.546395	0.363936	0.311743	0.754194	0.571757	0.635336	0.721023	0.353041	0	0	0.195915	0.408941	0.079354
LTR57	fibroblast	0	1	0.0527523	0	0.227844	0.155853	0.0998666	0.213695	0.267611	0.724854	0	0	0	0.629399	0.00973019
HERV3.int	fibroblast	0.438726	0.466271	0.752594	0.607348	0.439241	0.893244	1	0.921707	0.934099	0.89534	0	0	0.372059	0.403305	0.133197
HERVE.int	fibroblast	0.834642	0.464259	0.028727	0.0201761	0.0706532	0.0549356	0.0620977	0.0886628	0.269001	1	0	0	0.589974	0	0.0772177
LTR1C3	fibroblast	1	0	0	0.0697098	0	0.0055738	0.0380055	0	0.128495	0	0	0	0	0	0
LTR7Y	fibroblast	1	0	0.387783	0.118074	0.112639	0.141769	0.107671	0.196947	0.231883	0.178901	0	0	0.178394	0.415041	0.0450556
HERV9NC.int	fibroblast	0.36957	1	0.486039	0.144393	0.157184	0.337848	0.408016	0.379305	0.19763	0	0	0	0.109264	0.27766	0.0637941
LTR12D	fibroblast	1	0.664907	0.371212	0.311636	0.318117	0.26842	0.472149	0.340318	0.301598	0.65352	0	0	0	0.241178	0
LOR1b	fibroblast	0.650286	1	0.686972	0.24667	0.198704	0.38594	0.236234	0.35659	0.628791	0.30161	0	0	0.228416	0.505259	0.0491096
LTR88a	fibroblast	1	0	0.0749784	0.0764424	0.0862646	0.113737	0.090958	0.152793	0.322041	0	0	0	0	0.173807	0.0253289
LTR10B	fibroblast	0	0	0.358811	0.319448	0.048996	0.36582	0.490468	0.351027	1	0	0	0	0	0	0.0820683
LTR14A	fibroblast	0	0	0.231913	0.348964	0.114856	0.268777	0.242307	0.160892	0.335367	0	0	0	0	1	0.0964565
LTR22A	fibroblast	1	0	0.496012	0.128347	0.248689	0.267592	0.29117	0.284135	0.215246	0.886834	0	0	0	0	0.369676
MST.int	fibroblast	0.465819	1	0.38583	0.262738	0.195224	0.52136	0.150322	0.57138	0.547354	0	0	0	0	0.144974	0
LTR80A	fibroblast	0.654185	0	0.488682	0.0777058	0.451893	0.362487	0.161076	0.474627	0.555185	0	0	0	0.336578	1	0.11284
LTR86B1	fibroblast	1	0	0.584583	0.225812	0.409129	0.601403	0.74789	0.275816	0.826473	0	0	0	0	0.728864	0.191831
MamGypLTR1c	fibroblast	0.46434	1	0.580973	0.217476	0.177014	0.462377	0.230808	0.441645	0.498281	0	0	0	0	0.459598	0.0817885
LTR82B	fibroblast	0.811087	0	0.382897	0.161116	0.241606	0.449222	0.516527	0.517318	1	0	0	0	0.0717554	0.267627	0.0748531
LTR88b	fibroblast	0.764435	0.499348	0.806255	0.219504	0.392291	0.395656	0.511314	0.464015	0.718053	1	0	0	0.467217	0.288048	0.12398
MLT1F.int	fibroblast	1	0.901177	0.393183	0.110358	0.100444	0.243397	0.258268	0.278648	0.241681	0	0	0	0.149659	0.512193	0.0825056
LTR55	fibroblast	0.383066	1	0.492928	0.177376	0.574537	0.303345	0.439243	0.352529	0.881796	0	0	0	0	0.0668555	0
MamGypLTR2c	fibroblast	0	0	0.276411	0.170411	0.113396	1	0.843244	0.855995	0.782158	0.395062	0	0	0	0.482307	0.339325
MLT1I.int	fibroblast	0.262453	1	0.468123	0.2013	0.382944	0.336317	0.499394	0.370862	0.253007	0.158511	0	0	0	0.260843	0.0222241
LTR9A1	fibroblast	1	0.282259	0.456736	0.133458	0.201728	0.351734	0.37911	0.328939	0.386379	0	0	0	0	0.0892123	0.0763979
HERVL74.int	fibroblast	0	1	0.524111	0.333797	0.490663	0.545477	0.680267	0.666015	0.607147	0.454848	0	0	0	0.603933	0.160308
X1_LINE	fibroblast	0	0	0.43234	0.112968	0.399806	0.689546	1	0.50647	0	0	0	0	0	0.101568	0.0875629
PRIMA4_LTR	fibroblast	1	0.120561	0.146441	0.13966	0.0700508	0.127764	0.286477	0.133634	0.162049	0	0	0	0.0395874	0.202088	0.0115634
MER57E2	fibroblast	1	0	0.367955	0.124443	0.43761	0.970107	0.982652	0.571564	0.721204	0	0	0	0	0	0
MamGypLTR1d	fibroblast	0.593147	1	0.108868	0.101224	0.0725514	0.117986	0.039887	0.114663	0.210584	0.109827	0	0	0	0.216603	0.020484
LTR81A	fibroblast	1	0.225973	0.36807	0.285144	0.318665	0.567278	0.386442	0.505297	0.501206	0.149591	0	0	0.145458	0.263476	0.142376
MER57F	fibroblast	0.931513	0	0.957293	0.243068	0.629393	0.886373	1	0.663894	0.439566	0.527016	0	0	0	0.365245	0.373388
MLT1J1.int	fibroblast	0.68753	1	0.261242	0.0882366	0.045961	0.230338	0.197587	0.230327	0.400659	0	0	0	0.138264	0.0897344	0.0588988
MER90	fibroblast	0.829652	0	1	0.593115	0.252813	0.446669	0.706636	0.710935	0.625137	0.51984	0	0	0	0.403379	0.0571489
LTR4	fibroblast	0.377657	0	0.541538	0.547788	0.324177	0.750287	0.274166	0.472375	0.810245	0	0	0	0	1	0.0502342
MER87	fibroblast	0	0.995563	0.220931	0.349738	0.207612	0.152315	0.0962005	0.174048	0.938769	0	0	0	0.42375	1	0
MER51D	fibroblast	1	0.759083	0.106565	0.0511713	0.126884	0.131789	0.0361356	0.147107	0	0	0	0	0	0	0
PRIMA41.int	fibroblast	0.3877	0.697005	1	0.388018	0.345839	0.772891	0.848235	0.533718	0.583288	0	0	0	0.406112	0.487701	0.16575
LTR39.int	fibroblast	1	0	0.275765	0	0	0.186358	0.0791533	0.253631	0.395909	0	0	0	0	0	0
MER57B2	fibroblast	1	0.319897	0.264866	0.0970467	0.224164	0.276657	0.371009	0.276801	0.440145	0	0	0	0.118593	0.323171	0.0966386
LTR54B	fibroblast	1	0.553924	0.4906	0.253471	0.301276	0.397513	0.40383	0.421337	0.162078	0.0910394	0	0	0.0855971	0.507221	0.165872
LTR76	fibroblast	0.255198	1	0.249125	0.0847754	0.0642711	0.126372	0.11156	0.139025	0.127197	0.0505024	0	0	0.0921223	0.0666577	0.032459
MamGypLTR2b	fibroblast	0.543454	0	0.634704	0.383127	0.471158	0.384519	0.219019	0.579452	0.597641	0.328821	0	0	0	1	0.0506232
MER50C	fibroblast	1	0	0.0922658	0.178981	0.239908	0.0971587	0.246147	0.0803852	0.518454	0	0	0	0	0.290355	0
PABL_B	fibroblast	1	0	0.309288	0.226174	0.191756	0.320738	0.18166	0.245743	0.141231	0.279729	0	0	0.204482	0.672521	0.0176834
LTR15	fibroblast	1	0.204561	0.31649	0.110624	0.125072	0.244666	0.20003	0.265987	0.3389	0.0491917	0	0	0.0536538	0.209871	0.0459405
LTR38B	fibroblast	1	0.649616	0.559163	0.454695	0.229675	0.336089	0.653941	0.546928	0.579194	0	0	0	0.262403	0.570302	0.135094
LTR1F1	fibroblast	0	0.478167	1	0.437862	0.257115	0.236007	0.391586	0.200106	0.510156	0	0	0	0	0	0
X8_LINE	fibroblast	0.513388	1	0.203198	0.151138	0.196099	0.207213	0.282721	0.250793	0.321805	0	0	0	0	0.413799	0
L2.1_Crp	fibroblast	0	0	0	0	0.784676	0.286447	0	0.367451	0	0	0	0	1	0.672673	0.426546
MER4D0	fibroblast	1	0	0.606721	0.241837	0.477006	0.992478	0.336834	0.76306	0.767757	0.75445	0	0	0.259293	0.798959	0.0891604
HUERS.P3.int	fibroblast	1	0.201241	0.299323	0.244763	0.186801	0.341452	0.300781	0.452301	0.629139	0	0	0	0.175615	0.331529	0.0986624
HERV35I.int	fibroblast	1	0.346711	0.711133	0.299027	0.394762	0.743541	0.576838	0.638396	0.615405	0	0	0	0.0836571	0.192747	0.0705252
LTR37.int	fibroblast	0.570054	1	0.456653	0.233142	0.236424	0.469887	0.504459	0.42873	0.555454	0.0610635	0	0	0.0320714	0.654357	0.0985596
LTR28B	fibroblast	1	0	0.256454	0.0842965	0.172318	0.37165	0.657013	0.417606	0.516005	0	0	0	0	0.334385	0.0600022
LTR14	fibroblast	0.856244	1	0.180081	0.103182	0.122393	0.221945	0.16452	0.178517	0.151051	0.156299	0	0	0.213421	0	0.0318116
HERVK14C.int	fibroblast	0	0	1	0.294629	0.550193	0.577818	0.387929	0.569469	0	0	0	0	0	0	0.269328
MER66A	fibroblast	0	0	0.310141	0.554984	0.731366	0.197666	0.369002	0.746013	0.902802	0.865835	0	0	1	0.744965	0.125572
MamGyp.int	fibroblast	0.281272	1	0.488133	0.157577	0.336585	0.371232	0.195043	0.237832	0.461911	0	0	0	0.147904	0.0445177	0.0259644
MLT1A1.int	fibroblast	1	0	0.529685	0.220658	0.158649	0.196046	0.290714	0.268008	0.418846	0	0	0	0	0.452716	0.0481148
LTR46.int	fibroblast	0.377102	0.371829	0.401263	0.168114	0.114175	0.682437	0.241866	0.201064	1	0	0	0	0.157292	0.352222	0.0695893
L1M2a	fibroblast	0.474022	0.602817	1	0.528949	0.239164	0.613693	0.711209	0.479611	0.789067	0.0776866	0	0	0.13738	0.417674	0.0982729
L1P4e	fibroblast	1	0	0.475004	0.128627	0.325065	0.189923	0.242655	0.305376	0.736798	0	0	0	0	0.486017	0
LTR26D	fibroblast	1	0	0.111543	0.0970071	0.0590561	0.161694	0.236596	0.180416	0.0956829	0.302003	0	0	0	0.231711	0.08097
LTR107_Mam	fibroblast	1	0.588283	0.238196	0.0633913	0.0922023	0.118373	0.061861	0.162494	0.177548	0	0	0	0.117782	0.0931942	0.0655635
MLT1A.int	fibroblast	0.737538	0.867423	1	0.317923	0.494448	0.589429	0.661943	0.939174	0.995546	0	0	0	0	0.708966	0.170922
LTR7C	fibroblast	0.777206	1	0.255038	0.160712	0.0988331	0.190479	0.202863	0.255405	0.277894	0.0387183	0	0	0	0.196895	0.0144149
MER73	fibroblast	0	0.496477	0.231355	0.07948	0.176274	0.31318	0.237068	0.202071	0.64351	1	0	0	0.533722	0.353392	0.148798
LTR06	fibroblast	0	0	0	0	0.245853	0.166749	1	0.271819	0	0	0	0	0	0	0
LTR48	fibroblast	0.25785	1	0.292416	0.113306	0.089264	0.140351	0.127084	0.178994	0.204089	0.140915	0	0	0.122954	0.237418	0.0227055
MER41.int	fibroblast	0.97383	0.924217	1	0.285279	0.397377	0.710452	0.711704	0.760546	0.817089	0.355478	0	0	0.209009	0.524226	0.17043
MLT1E3.int	fibroblast	0	0	1	0.345872	0.624414	0.360948	0	0.400902	0.330436	0	0	0	0	0	0.154296
PABL_A	fibroblast	0.88559	0	0.697583	0.356935	0.306701	0.40409	0.684566	0.508643	0.376589	0.0767942	0	0	0	1	0.104396
LTR28C	fibroblast	0.51921	1	0.414297	0.219394	0.166264	0.26732	0.437476	0.36468	0.109183	0	0	0	0.0692502	0.261971	0.0905959
MLT1K.int	fibroblast	0	1	0.125329	0.0436603	0.0325881	0.069284	0.0530648	0.0934674	0.121905	0	0	0	0	0	0
LTR47A2	fibroblast	0.234421	1	0.571086	0.0874154	0.141373	0.181179	0.283762	0.231733	0.23382	0	0	0	0	0	0
MER50.int	fibroblast	0.428577	0.512348	1	0.219252	0.29333	0.461177	0.38496	0.631718	0.245854	0	0	0	0.196838	0.299506	0.0451667
PABL_B.int	fibroblast	0	1	0.325269	0.134787	0.157266	0.281704	0.272291	0.171725	0.435004	0	0	0	0.573752	0.486105	0.338539
MER66D	fibroblast	0.802482	0	0.102193	0.123034	0.166403	0.204973	0.0836004	0.300767	0.0489915	1	0	0	0.401585	0	0.0403655
LTR87	fibroblast	1	0.750208	0.606044	0.291958	0.334337	0.570984	0.569763	0.37361	0.545569	0	0	0	0.28389	0.511592	0.0642204
HERV1_LTRd	fibroblast	0	0	0	0.622696	0	0.292956	0	0.210155	0	0	0	0	0	0	1
LTR80B	fibroblast	0.44371	0	0.583351	0.45242	0.158885	1	0.545237	0.58534	0.665841	0	0	0	0.375354	0.386491	0
MLT1E2.int	fibroblast	1	0	0.224027	0.0912158	0.242571	0.216711	0.293113	0.215093	0.701217	0	0	0	0.222642	0.368181	0.124211
MER57E1	fibroblast	1	0.76516	0.367308	0.268562	0.149914	0.3745	0.372534	0.281434	0.615313	0.283474	0	0	0	0.459617	0.0655853
MER41C	fibroblast	1	0.987241	0.595029	0.277266	0.345113	0.444969	0.530788	0.597322	0.508062	0.217994	0	0	0.312256	0.47517	0.0572369
L1M2b	fibroblast	1	0	0.330889	0.12086	0.287982	0.341387	0.492086	0.335497	0.508699	0	0	0	0	0.280915	0.153061
MSTD.int	fibroblast	0.766864	1	0.49222	0.153784	0.308916	0.2499	0.42458	0.329478	0.36709	0.0880836	0	0	0.159277	0.345898	0.0754222
LTR22B2	fibroblast	0	0	0.214311	0	0.471009	0	1	0.128139	0	0.634711	0	0	0	0	0.525008
LTR6A	fibroblast	1	0.709033	0.268963	0.16777	0.162349	0.281168	0.19917	0.330813	0.478341	0	0	0	0.0479375	0.315844	0.016763
MamGypLTR3	fibroblast	0.310673	1	0.214784	0.0542111	0.117926	0.157092	0.0727407	0.167151	0.0936131	0	0	0	0.76784	0.0805923	0.0615618
MER51C	fibroblast	1	0	0.415183	0.243712	0.273283	0.372096	0.182074	0.568648	0.330899	0.537323	0	0	0.295397	0.155814	0
LTR35A	fibroblast	0.808217	1	0.44073	0.17558	0.130602	0.112531	0.237496	0.238783	0.357192	0	0	0	0.230967	0.459476	0.180047
HERV4_I.int	fibroblast	0.863469	0.659481	0.293832	0.231857	0.243786	0.473564	0.528296	0.539912	0.31317	0	0	0	0.29677	1	0.16529
MLT1J2.int	fibroblast	0	1	0.150234	0.0729126	0.110863	0.16658	0.104581	0.191369	0.313647	0	0	0	0	0.29864	0.0458288
MER34D	fibroblast	0	1	0.427971	0.11503	0.158155	0.280361	0.207016	0.275012	0.269005	0	0	0	0.271703	0.584496	0.0701781
MER51.int	fibroblast	0.80644	1	0.381252	0.0460207	0.147926	0.149798	0.141838	0.189388	0.122492	0.1256	0	0	0.0269767	0.125876	0.0275948
MER65C	fibroblast	1	0.5727	0.481885	0.146834	0.223263	0.283355	0.270279	0.399426	0.233786	0.0987192	0	0	0.106253	0.219034	0.0428996
LTR12B	fibroblast	0.514849	1	0.079155	0	0.0466551	0.0841847	0.139508	0.076548	0.069215	0	0	0	0	0.053692	0.146247
MER57D	fibroblast	0.321676	0	1	0.314948	0.349658	0.447544	0.547337	0.602896	0.937929	0	0	0	0.367764	0.284587	0.0226121
LTR35	fibroblast	0	1	0.406306	0.210403	0.39344	0.284136	0.369577	0.202817	0.168376	0	0	0	0	0.241699	0.0548347
MER50B	fibroblast	1	0.252293	0.139859	0.0592144	0.113758	0.156518	0.165198	0.16247	0.364022	0	0	0	0.0813129	0.0929474	0.0682743
LTR1D	fibroblast	1	0.562712	0.646905	0.449373	0.476575	0.265089	0.440627	0.363067	0.969951	0	0	0	0.198519	0.360186	0.176808
MSTA1.int	fibroblast	0	0	0.371941	0.137251	0.216684	0.213486	0.456878	0.644171	0	0	0	0	0	1	0
MLT1G.int	fibroblast	0.703428	1	0.146146	0.0596256	0.0663375	0.159789	0.175195	0.15378	0.169962	0	0	0	0	0.338656	0.0243028
LTR31	fibroblast	0.943696	1	0.509086	0.356258	0.464738	0.388833	0.545762	0.394564	0.273158	0.287198	0	0	0.158435	0.528799	0.01217
L1M3c	fibroblast	0.750217	0.635618	0.823368	0.487742	0.360032	0.480702	0.928782	0.708829	1	0.0422714	0	0	0.185831	0.765426	0.151443
MER83B	fibroblast	1	0	0.230426	0.161703	0.0470745	0.352059	0.316981	0.233606	0.240271	0	0	0	0.276268	0	0.0651061
PrimLTR79	fibroblast	0	1	0.284014	0.11509	0.0550579	0.621693	0.142858	0.184721	0.488589	0	0	0	0	0.499274	0
LTR27	fibroblast	0	0	0.245331	0	0.285977	0.311912	0.518808	0.379563	1	0	0	0	0	0.75696	0.132925
HERV30.int	fibroblast	1	0	0.492224	0.0760671	0.218914	0.297977	0.225203	0.26329	0.364788	0	0	0	0	0	0.0405261
MER74C	fibroblast	1	0	0.330825	0.182228	0.0820278	0.358554	0.289328	0.311459	0.367765	0	0	0	0	0.465704	0.0844098
LTR1	fibroblast	1	0	0.0865943	0.0574155	0.101772	0.326869	0.217529	0.226347	0.111625	0	0	0	0.135004	0.123048	0.0116702
L1M3e	fibroblast	0.908905	0.958114	0.798444	0.369811	0.267057	0.428434	0.716476	0.506849	0.814723	0	0	0	0.154015	1	0.0820535
LTR6B	fibroblast	1	0.929593	0.263582	0.125678	0.23249	0.287866	0.319908	0.321309	0.409478	0.259283	0	0	0.0983768	0.0593636	0.0204127
LTR38A1	fibroblast	0	1	0.060858	0.0510742	0	0.0628459	0	0.0074665	0	0	0	0	0.136683	0.136978	0
HERVS71.int	fibroblast	0.554499	1	0.241724	0.170801	0.187598	0.147795	0.256755	0.187311	0.320327	0.134189	0	0	0.165119	0.133837	0.0492074
MLT1F2.int	fibroblast	0.25449	1	0.300887	0.216773	0.388096	0.264608	0.496881	0.390193	0.730421	0.455379	0	0	0.298907	0.274311	0.043587
LTR90A	fibroblast	1	0	0.393599	0.294928	0.445897	0.880461	0.836311	0.64763	0.553155	0	0	0	0.713845	0.128147	0.213081
THE1.int	fibroblast	0	0	0.74296	0.731675	0.262771	0.616395	0.442545	0.423472	1	0	0	0	0	0.422778	0.280522
L1M6B	fibroblast	1	0.887222	0.28788	0.190538	0.153914	0.375028	0.314194	0.285433	0.324689	0.074754	0	0	0.0616415	0.254225	0.0479294
LTR69	fibroblast	0	0	0	0.123246	0.314897	0.755182	0	1	0	0	0	0	0	0.720528	0
MLT1H2.int	fibroblast	0.415505	1	0.280167	0.0964136	0.243148	0.214864	0.322085	0.244669	0.391733	0.0651389	0	0	0.0959766	0.0677581	0.0417417
LTR1F2	fibroblast	0	0.977587	1	0.385983	0.536367	0.692397	0.429562	0.722175	0.731061	0	0	0	0	0.514226	0.0661767
MER89.int	fibroblast	0	1	0.230903	0.0425054	0.145721	0.101411	0.162307	0.110631	0.286163	0.133146	0	0	0.134334	0.211631	0.0613421
L1MEg1	fibroblast	1	0.463005	0.45512	0.384692	0.236324	0.412195	0.592404	0.430766	0.600472	0	0	0	0.103455	0.525034	0.0521538
LTR2752	fibroblast	1	0.406624	0.104629	0.0228333	0.0593063	0.0297845	0	0.0849444	0	0.313433	0	0	0.670544	0.0651181	0.0561285
AluYb9	fibroblast	0.963417	0.530096	1	0.263673	0.446343	0.616673	0.854641	0.553838	0.593417	0	0	0	0.0296269	0.857728	0.0470919
MLT1N2.int	fibroblast	1	0	0	0	0.120554	0.0308159	0	0	0	0	0	0	0	0	0
MER70.int	fibroblast	0	0	0.459677	0.470151	0.58326	0.361315	0.35007	0.518283	1	0	0	0	0	0	0.976212
L1M3d	fibroblast	0.768508	1	0.336948	0.191261	0.27557	0.222343	0.384186	0.284168	0.533901	0.140376	0	0	0.0891543	0.357879	0.06264
LTR5A	fibroblast	1	0.500818	0.44979	0.337523	0.247241	0.205751	0.38869	0.33243	0.547384	0.234928	0	0	0.206599	0.213535	0.0654229
LTR34	fibroblast	1	0	0.305728	0.393651	0.169781	0.227843	0.44976	0.331791	0.956275	0.538064	0	0	0	0.515384	0
HERV17.int	fibroblast	0.423142	0.281203	0.559909	0.135278	0.2347	0.432322	0.549266	0.476521	1	0.268475	0	0	0.164924	0.745535	0.198503
L1PBb	fibroblast	1	0	0.632712	0.298346	0.579206	0.596316	0.913018	0.539884	0.585902	0.162392	0	0	0.0676905	0.770557	0.184013
PABL_A.int	fibroblast	0.893443	0.20057	0.964944	0.624925	0.557325	0.903684	0.674897	0.932675	1	0.286051	0	0	0.0421633	0.566184	0.0958887
MER68C	fibroblast	0	0	0.450911	0.35946	0.0794922	0.680617	0.166936	0.449325	1	0	0	0	0	0.328193	0
LTR91	fibroblast	1	0	0.0428226	0	0.0287813	0.151708	0.19934	0.194368	0.270751	0	0	0	0	0.269811	0.0361524
LTR3B	fibroblast	0	0	0.14485	0.339662	0	0.150839	0	0.182735	0.550611	0	0	0	1	0.960329	0
MER76	fibroblast	0.626983	1	0.343517	0.208692	0.117259	0.186971	0.175397	0.15543	0.0846167	0	0	0	0	0.266074	0.0199896
MLT1L.int	fibroblast	0	0	0.395738	0.181686	0	0.257683	0	0.619496	1	0	0	0	0	0	0
CR1.12_AMi	fibroblast	0	0	0.684131	0.251583	0.350973	0.50477	0.288492	0.444447	0.742275	0	0	0	0.279534	1	0.0854293
LTR47B4	fibroblast	0	0	0	0	0.404889	0.250975	0	0.726301	1	0	0	0	0	0	0
LTR19.int	fibroblast	0.404027	1	0.29105	0.118871	0.17684	0.403855	0.632788	0.420253	0.392087	0	0	0	0	0.193895	0.101059
HERVIP10B3.int	fibroblast	1	0.154571	0.146703	0.0554477	0.124089	0.100408	0.0921257	0.143482	0.214798	0.0816421	0	0	0	0.116971	0.0436301
MSTC.int	fibroblast	1	0.947697	0.121287	0.122636	0.0995293	0.117118	0.0242534	0.101755	0.233032	0.336443	0	0	0.0820942	0.0459147	0.0550231
MER83B.int	fibroblast	0	0.990994	0.391226	0.565507	0.428704	0.62532	1	0.661159	0	0	0	0	0	0.95765	0.0769199
MER61F	fibroblast	0	1	0.0128101	0.0153007	0.0384936	0.0218488	0.0409193	0.0456653	0	0	0	0	0.157478	0.159908	0.01673
LTR1A1	fibroblast	0.514505	0	0.609101	0.304837	0.211201	0.2026	0.649487	0.503353	0.506697	1	0	0	0.881444	0.0653834	0.151646
MLT1F1.int	fibroblast	1	0	0.0691825	0.0428606	0.163854	0.113962	0.233918	0.186676	0	0	0	0	0	0.105281	0
MLT1.int	fibroblast	0	0	0.420075	0.183988	0.248954	0.239647	1	0.450705	0	0.901616	0	0	0	0.373948	0.108658
AluYk12	fibroblast	1	0.636127	0.830308	0.138015	0.227473	0.437066	0.27604	0.358282	0.301085	0	0	0	0	0.354167	0.0625437
LTR72B	fibroblast	1	0	0	0.04356	0.0584291	0.0320728	0.025783	0.0621289	0	0	0	0	0.104049	0.109882	0.129831
LTR27E	fibroblast	1	0	0.416343	0.255112	0.526341	0.766816	0.478832	0.387915	0.580872	0	0	0	0	0	0.0756395
L1P3b	fibroblast	0	0	1	0.302253	0	0.187741	0.483391	0.645641	0	0	0	0	0	0	0
CR1.11_Crp	fibroblast	0	0	0	0	0	0.184926	0	0.297036	0	0	0	0	0	0	1
LTR22C0	fibroblast	0	0	1	0.368672	0.0863154	0.642054	0.396339	0.333342	0.731475	0.880703	0	0	0.871989	0	0
LTR68	fibroblast	1	0.369601	0.616953	0.153853	0.157472	0.30259	0.294886	0.568571	0.174201	0	0	0	0	0.102747	0
CR1.L3B_Croc	fibroblast	0	0	1	0	0	0	0	0.371351	0	0	0	0	0	0	0
L1M2c	fibroblast	0.365201	0.780628	0.85909	0.469438	0.433106	0.539494	0.678852	0.621881	1	0.210858	0	0	0.248608	0.696317	0.20796
LTR12_	fibroblast	0.827341	0.538998	0.366629	0.280452	0.413117	0.385951	0.306304	0.276168	0.514621	0	0	0	1	0.638862	0.145526
CR1.13_AMi	fibroblast	0	0	0	0.052933	0.0994452	0.0438015	0	0.0843528	1	0	0	0	0	0	0.0681023
PRIMAX.int	fibroblast	0	0	0	0.540745	0.166314	0.223919	1	0.567595	0	0	0	0	0	0	0.529306
UCON86	fibroblast	0	0	0	0.230385	0.185571	0.550021	0	0.579094	1	0	0	0	0	0	0
L1M3de	fibroblast	0.849483	0.665336	0.831458	0.465541	0.628098	0.870136	0.987585	0.859241	1	0.522667	0	0	0.216397	0.884514	0.164711
LTR28	fibroblast	0	0	0	0.281455	0.170262	0.241321	0.429305	0.286268	0.322623	0	0	0	0	1	0.131838
L1MEa	fibroblast	1	0	0.70101	0.357423	0.375834	0.297983	0.570202	0.553192	0.705775	0	0	0	0.158558	0.585501	0.234402
L1M2a1	fibroblast	0	0	0.659694	0.808285	1	0.700829	0.988827	0.764659	0.419112	0	0	0	0	0.570751	0
X2_LINE	fibroblast	0	0	0.161585	0.169292	0.277257	0.356173	0.418179	0.496692	0.589373	1	0	0	0	0.569363	0
MER68B	fibroblast	1	0.324569	0.464829	0.245764	0.410792	0.354527	0.527792	0.406372	0.334835	0.38889	0	0	0	0.224443	0.167963
MER95	fibroblast	1	0	0.37683	0.231214	0.221968	0.377867	0.283396	0.585727	0.317806	0	0	0	0.0841469	0.0944661	0.021429
MER61C	fibroblast	1	0	0.149106	0.0279462	0.116838	0.188512	0.111549	0.176613	0.0438391	0.227553	0	0	0	0.233369	0.0247373
HERVK14.int	fibroblast	0.198175	1	0.405653	0.164303	0.286089	0.278378	0.272831	0.324592	0.256375	0.145504	0	0	0.251969	0.198568	0.043475
MER92A	fibroblast	0.383066	1	0.137978	0	0	0.0366971	0.050714	0.08942	0	0	0	0	0	0	0
MER61E	fibroblast	0	0.513198	0.983585	0.158206	0.219302	0.0941689	0.317349	0.129149	0	0	0	0	0	1	0.0999218
MER72B	fibroblast	0	1	0.358728	0.455435	0.160224	0.794472	0.511092	0.528912	0.384665	0	0	0	0	0.106074	0
LTR47B3	fibroblast	0	0	1	0.667232	0.215783	0.5523	0.780721	0.616724	0.272124	0	0	0	0	0.555151	0.162174
L1M3b	fibroblast	0.773052	0.580988	0.824528	0.534795	0.371418	0.421439	0.926695	0.668854	0.809081	1	0	0	0.208282	0.677682	0.140184
LTR1B	fibroblast	0	0	1	0.418774	0.714126	0.290472	0.814928	0.551524	0	0	0	0	0	0.879943	0.394149
LTR9C	fibroblast	0	1	0.282201	0	0.143357	0.239622	0.113927	0.151122	0.336106	0	0	0	0	0.156998	0.055067
HUERS.P2.int	fibroblast	0.240602	1	0.166895	0.0711734	0.0660987	0.12233	0.323077	0.215692	0.139842	0.17902	0	0	0	0.0995712	0.0719133
L1P4b	fibroblast	0	0	0	0	0	0.940919	0.782449	1	0	0	0	0	0	0	0.710889
MER92D	fibroblast	1	0	0	0.087234	0.126418	0.425941	0.486984	0.137613	0	0	0	0	0	0.124063	0
MER110.int	fibroblast	0.12273	1	0.0750318	0.0389377	0.0517645	0.0761296	0.140848	0.121333	0.146356	0	0	0	0.0519175	0.1533	0
MER83C	fibroblast	0	1	0.0356024	0.062714	0.0876481	0.201488	0.0768191	0.125893	0.13343	0	0	0	0	0.326939	0
L1P4a	fibroblast	0.316363	1	0.252629	0.241704	0.227781	0.313533	0.56885	0.38657	0.539156	0.336002	0	0	0.122318	0.43592	0.0686689
L1P4d	fibroblast	1	0	0.795921	0.201101	0.104145	0.173787	0.206929	0.32977	0.539505	0	0	0	0	0.614197	0.146595
LTR53.int	fibroblast	0.631328	1	0.500173	0.360675	0.272967	0.472521	0.665069	0.490506	0.421877	0	0	0	0.0639793	0.403654	0.0497212
HERVP71A.int	fibroblast	1	0.706257	0.166512	0.0529989	0.2487	0.123651	0.208554	0.143742	0.201198	0.0582224	0	0	0	0.239398	0.0817204
MER101B	fibroblast	0	0	0.768702	0.492941	0.639929	0.888223	0.387606	0.79399	0.619059	0	0	0	0	1	0.294721
HERVL32.int	fibroblast	1	0	0	0.148203	0.0963999	0.0624328	0.098757	0.0195207	0	0	0	0	0	0	0.0535552
LTR58	fibroblast	0	0	0	0.51801	0	0.143719	0	0.0761516	0	0	0	0	0	1	0
LTR22E	fibroblast	0.786287	1	0.218762	0.411237	0.130873	0.18525	0.247857	0.195263	0.112698	0.449812	0	0	0	0.340374	0.0688087
LTR73	fibroblast	0	0	0.86823	0.610208	0.279198	0.208663	0.406905	1	0	0	0	0	0	0.25419	0.0242874
MER57C2	fibroblast	1	0.673208	0.677192	0.308247	0.307365	0.623194	0.400258	0.539186	0.675103	0	0	0	0.0651569	0.326397	0.0693879
LTR35B	fibroblast	1	0	0.0436864	0.0250614	0.126226	0.240282	0.091927	0.081169	0.205738	0	0	0	0	0	0
LTR22B	fibroblast	0	0	0.19597	0.25307	0.427951	0.323754	0.502862	0.554257	1	0.269139	0	0	0	0.411316	0.101739
L1PBa1	fibroblast	0.470972	0.706572	0.618938	0.642341	0.510147	0.533646	0.745975	0.527576	1	0.911551	0	0	0.0743025	0.574322	0.24085
LTR27D	fibroblast	1	0	0.0661602	0.034354	0.0537584	0.0920909	0.0696701	0.181808	0	0	0	0	0	0.114152	0.0113638
LTR5	fibroblast	0	0	0.246979	0	0	0.0893161	0	0.0245933	0	1	0	0	0	0	0
LTR19C	fibroblast	0.466431	0	0.170335	0.237636	0.489788	0.374454	0.422378	0.486688	0.125442	1	0	0	0	0.904766	0.0574203
LTR25.int	fibroblast	1	0.620507	0.486265	0.134601	0.198502	0.34796	0.460571	0.361639	0.508979	0.153676	0	0	0.0858307	0.461079	0.104658
HERVH48.int	fibroblast	0.73708	1	0.558406	0.369842	0.249814	0.539214	0.455865	0.553743	0.575721	0.33933	0	0	0.154653	0.678234	0.0901518
LTR30	fibroblast	1	0.833415	0.23499	0.248055	0.114799	0.237245	0.168537	0.29159	0.459081	0	0	0	0.230562	0.567708	0.0152084
LTR52.int	fibroblast	0	0	0.369286	0.642188	0.205534	0.733223	0.736935	0.822965	1	0	0	0	0	0	0.197335
MSTB2.int	fibroblast	0.668797	1	0	0	0.0243197	0.0675785	0.0594107	0.134933	0	0.253002	0	0	0	0.104218	0
HERVKC4.int	fibroblast	1	0	0.130206	0.0999262	0.0237836	0.170617	0.227693	0.0829518	0.41495	0	0	0	0.411435	0.16555	0.0781575
LTR22	fibroblast	0	0	0.546542	0	0.327514	0.16016	0	0.525075	0	0	0	0	0	1	0.640713
MER67D	fibroblast	1	0	0.288492	0.103365	0.259596	0.323237	0.43772	0.281174	0.297097	0	0	0	0	0.0673276	0.0393175
MER87B	fibroblast	0.992131	0	1	0.138062	0.475113	0.549475	0.185253	0.549918	0.897965	0.493189	0	0	0	0.728519	0.0751493
MLT1G3.int	fibroblast	1	0	0.631296	0.0842168	0.343045	0.189482	0.256585	0.447062	0	0	0	0	0.325291	0.476621	0.0803276
MER88	fibroblast	0	1	0.133825	0	0	0.0621733	0	0.0608155	0	0	0	0	0	0	0.0445374
LTR108e_Mam	fibroblast	1	0	0.11989	0.0355535	0	0.128988	0.105204	0.154235	0.214056	0	0	0	0	0.178307	0.018742
MER92C	fibroblast	0	0	0.602526	0	0.268112	0.133094	0.196469	0.36591	0	1	0	0	0	0.299159	0
HERVI.int	fibroblast	0.383066	1	0.287259	0.16831	0.313789	0.314253	0.393172	0.334344	0.48066	0	0	0	0	0.19434	0.0730843
LTR10B1	fibroblast	1	0.584444	0.0571649	0.0723171	0.17703	0.151225	0.344729	0.120876	0.279998	0.450559	0	0	0	0.183232	0
LTR25	fibroblast	1	0.342129	0.256739	0.3354	0.447382	0.202827	0.347105	0.340892	0.3857	0.509892	0	0	0.110348	0.0995457	0
LTR60	fibroblast	0	0	0.482499	0.319437	1	0.139721	0	0.0709841	0	0	0	0	0	0	0.612687
LTR3	fibroblast	0	0	0.955356	0.49132	0.162318	0.34653	0.630636	0.677843	1	0	0	0	0	0	0
HERVK3.int	fibroblast	1	0.728586	0.435484	0.181237	0.345175	0.318559	0.333775	0.314696	0.447069	0.15933	0	0	0.172206	0.531043	0.1133
L1P	fibroblast	0	1	0	0.0224449	0	0.0204626	0	0.0086839	0.0360764	0	0	0	0	0	0
LTR108d_Mam	fibroblast	0	0	0	0	0	0.166892	0	0.195876	1	0	0	0	0	0	0
LTR18C	fibroblast	0	0	0	0	1	0	0	0	0	0	0	0	0	0	0
MER83A.int	fibroblast	0	0	0.83311	0.436028	0.0604219	0.471786	1	0.968898	0.703442	0	0	0	0	0.296827	0.227468
LTR72	fibroblast	0.62694	0	0.446816	0.180202	0.117209	0.440933	0.643802	0.657636	1	0	0	0	0	0.397477	0.0134698
MER76.int	fibroblast	0	0	0.473908	0.0380249	0.0856317	0.0713557	0.178858	0.256174	0.66934	0	0	0	1	0	0.0699266
LTR14C	fibroblast	0	1	0.0703695	0.0587056	0.203353	0.0654363	0.202136	0.0243929	0	0	0	0	0.497833	0	0.10671
LTR47B	fibroblast	0	0	0.313972	0.289256	0.718838	1	0	0.545583	0	0	0	0	0	0	0
LTR38C	fibroblast	0	0.874532	0.295156	0.228458	0.259119	0.585119	1	0.386336	0.495939	0	0	0	0.201988	0.262306	0.0546018
HERV1_LTRa	fibroblast	1	0	0.136766	0.10346	0.0740643	0.0417725	0.0811326	0.16708	0	0	0	0	0	0.194361	0
L2.3_AMi	fibroblast	0	0	0	0	1	0.182933	0	0.902432	0	0	0	0	0	0	0
LTR10G	fibroblast	0	1	0.158214	0.0490008	0.109666	0.105726	0.165453	0.0905553	0.154971	0	0	0	0	0.132677	0.0445129
LTR108c_Mam	fibroblast	0	0	0.955004	0	0	0	1	0.543425	0	0	0	0	0	0	0
LTR108b_Mam	fibroblast	0	0	0.606714	0.161653	0.315992	0.257273	1	0.281892	0	0	0	0	0	0	0
ERVL47.int	fibroblast	0	0	0.605744	0.133009	0.764184	0.499005	0.209969	0.497471	1	0	0	0	0	0	0
LTR59	fibroblast	0	0	1	0.220264	0.179334	0.461142	0.479154	0.371113	0	0	0	0	0	0	0
MER57E3	fibroblast	1	0.770291	0.235084	0.209214	0.156318	0.370222	0.266993	0.354144	0.237874	0.0418637	0	0	0.0396196	0.0813307	0.0176673
LTR70	fibroblast	0.676103	0.495132	1	0.556776	0.270633	0.785139	0.66133	0.535411	0.914531	0	0	0	0.24036	0.440799	0.03983
L1P4c	fibroblast	0	0	1	0	0	0	0	0.341432	0	0	0	0	0	0	0
HERVK11D.int	fibroblast	0	0	0	0.382288	0	0.139884	0	0.132667	1	0	0	0	0	0	0
MLT1E1.int	fibroblast	0	0	0	0	0	0	0	0	0	0	0	0	0	1	0
HERV1_I.int	fibroblast	1	0	0.155212	0.122934	0	0.166889	0.292893	0.176354	0	0	0	0	0.342869	0.15012	0.0509288
HERV15.int	fibroblast	1	0	0.53502	0.365324	0.78121	0.225404	0.49872	0.485562	0.49974	0.385325	0	0	0.244334	0.45196	0.329571
LTR109A2	fibroblast	0	0	0.574477	0.202464	0	0.276427	0.291547	0.138452	1	0	0	0	0	0.321839	0
HERV.Fc1_LTR3	fibroblast	0	0	0	1	0	0	0	0	0	0	0	0	0	0	0
HERV.Fc1.int	fibroblast	0	0	0	0.0873811	0.142647	0.153085	0.454774	0.233191	0.361257	1	0	0	0	0.682269	0
LTR43.int	fibroblast	0	1	0.0833865	0.0719505	0.309577	0.0146931	0	0.169511	0.15876	0	0	0	0	0.237031	0.0664676
HERV1_LTRc	fibroblast	1	0	0	0	0	0.022532	0.0936803	0	0	0	0	0	0	0	0
MER9B	fibroblast	0	0	1	0.0906544	0.230507	0.104012	0.166901	0.272043	0	0	0	0	0	0	0
LTR22C	fibroblast	0	0	1	0	0	0.109502	0	0	0	0	0	0	0	0	0.429675
HERV1_LTRe	fibroblast	0	0	0.0533745	0	0.268834	0.187782	0	0.0482929	0	0	0	0	1	0.318984	0
HERV1_LTRb	fibroblast	0	0	0	1	0	0.236506	0	0.652864	0	0	0	0	0	0	0
HERV.Fc1_LTR2	fibroblast	0	0	0	0	0	1	0	0	0	0	0	0	0	0	0
L1P5	endothelial	0.229575	0	0	1	0.381911	0.596309	0	0	0	0	0	0	0.246391	0.676269	0.0362293
AluY	endothelial	0.974819	1	0.736823	0.541279	0.291862	0.90106	0.880233	0.905627	0.744994	0.393646	0.394909	0.427462	0.219228	0.74471	0.352101
L1MB5	endothelial	0.979956	1	0.604191	0.45902	0.396716	0.73202	0.805348	0.688793	0.750074	0.242813	0.183323	0.35729	0.17928	0.527273	0.210852
AluSc	endothelial	0.983693	1	0.643003	0.497663	0.248707	0.858686	0.853538	0.857244	0.688052	0.30006	0.244231	0.347301	0.115247	0.653523	0.217853
HAL1	endothelial	0.979691	1	0.703925	0.594026	0.475275	0.818116	0.843452	0.770905	0.791995	0.357909	0.286048	0.3879	0.203348	0.61517	0.245926
L2a	endothelial	0.968227	1	0.671207	0.665321	0.622477	0.876306	0.938062	0.865969	0.802512	0.524353	0.501767	0.592234	0.384563	0.721459	0.44608
L1MA9	endothelial	0.887015	0.956295	0.522625	0.520042	0.380118	0.823895	1	0.779044	0.769995	0.213794	0.113565	0.26554	0.196223	0.631705	0.171241
L2	endothelial	0.987495	1	0.687362	0.646077	0.587034	0.85329	0.888489	0.882505	0.759096	0.428174	0.311004	0.502193	0.198402	0.683988	0.309963
L1PA4	endothelial	0.929209	1	0.647875	0.60633	0.44492	0.764099	0.965547	0.825728	0.779481	0.294868	0.183856	0.422843	0.200939	0.623413	0.233194
AluSg	endothelial	1	0.989532	0.669156	0.463589	0.263324	0.825475	0.825734	0.84631	0.667577	0.257647	0.347392	0.404444	0.152571	0.668959	0.216362
MSTA.int	endothelial	1	0.882839	0.38387	0.362225	0.4348	0.19095	0.667848	0	0.475258	0.152199	0	0.446764	0.110975	0.295046	0.192147
L1PA8A	endothelial	1	0.858978	0.508013	0.397439	0.183837	0.721482	0.99314	0.720441	0.514652	0.170241	0.2498	0.240461	0.0740689	0.4201	0.166536
AluJb	endothelial	1	0.981905	0.76628	0.648365	0.456741	0.919659	0.925367	0.916865	0.813996	0.452968	0.48821	0.537625	0.355019	0.767334	0.409239
L1MC4	endothelial	1	0.984976	0.661266	0.572843	0.46356	0.848428	0.950709	0.761264	0.797425	0.355637	0.394893	0.437618	0.291205	0.652344	0.253333
HUERS.P3b.int	endothelial	0.780305	0.909485	0.616789	0.395875	0.371081	0.792882	0.170132	0.519756	1	0.291192	0.409348	0.0510811	0.12421	0.4635	0.137169
AluJo	endothelial	0.97415	1	0.684669	0.59285	0.397167	0.869062	0.881091	0.88907	0.76332	0.409352	0.42368	0.501627	0.305654	0.713391	0.345163
L1MDb	endothelial	0.658763	0.699696	0.912793	1	0.313533	0.807552	0.910666	0.866766	0.853066	0.0789	0	0.640731	0.148123	0.403876	0.161396
AluSp	endothelial	0.977371	1	0.699625	0.509286	0.250133	0.82807	0.851109	0.835451	0.709305	0.315985	0.274442	0.405495	0.195424	0.671184	0.277167
L1MC1	endothelial	0.980657	1	0.605545	0.601369	0.421793	0.731961	0.94644	0.83419	0.739846	0.277347	0.37566	0.307899	0.135878	0.584947	0.205803
MLT1C	endothelial	0.954936	1	0.568175	0.497303	0.417399	0.776699	0.604516	0.426839	0.643095	0.240633	0.187704	0.442458	0.553935	0.475708	0.333882
AluSz	endothelial	0.980449	1	0.725242	0.5893	0.383389	0.88113	0.877254	0.880278	0.745951	0.404922	0.316772	0.468039	0.296781	0.731859	0.35164
AluSx1	endothelial	0.974954	1	0.755363	0.583053	0.372343	0.877116	0.871799	0.864064	0.756779	0.390203	0.367946	0.456727	0.23334	0.742368	0.358531
MIRb	endothelial	1	0.994344	0.689311	0.727658	0.706649	0.885427	0.918475	0.860259	0.858231	0.557907	0.579507	0.63767	0.422731	0.738854	0.443958
MLT1K	endothelial	1	0.933305	0.435933	0.445289	0.393353	0.684989	0.964988	0.828471	0.837359	0.354264	0.102751	0.275939	0.13066	0.445425	0.226721
LTR5_Hs	endothelial	1	0.904163	0.686513	0.326654	0.122712	0.620004	0.492987	0.638715	0.3832	0.0513185	0	0	0.12034	0.587599	0.0682788
HERVIP10F.int	endothelial	0.388788	1	0.492851	0.053416	0.280108	0.257605	0.912459	0.487738	0	0	0	0.0818424	0.130198	0.21437	0.131282
LTR16A1	endothelial	1	0.161785	0.13596	0.225257	0.733636	0.511094	0.757449	0.1817	0	0.227888	0	0.663651	0.115743	0.248633	0.154343
L1M6	endothelial	0.897675	1	0.508042	0.164876	0.256182	0.627365	0.810557	0.415533	0.706789	0.244304	0.217595	0.245935	0.0545029	0.429416	0.100472
THE1D.int	endothelial	1	0.887273	0.402902	0.124539	0.298272	0.215652	0.26858	0.276634	0.275779	0.406728	0	0.200669	0.329556	0.0701114	0.0761123
LTR48B	endothelial	0.582506	0.511079	0.273898	0.525939	0.148315	0.452084	1	0.604003	0.198729	0.1397	0	0.220207	0.0360257	0.489954	0.0765941
L2c	endothelial	1	0.996681	0.716901	0.645427	0.642463	0.875956	0.948083	0.85987	0.824952	0.489799	0.443495	0.541101	0.360803	0.719419	0.402088
L2b	endothelial	0.999568	1	0.620839	0.637439	0.597082	0.860594	0.963988	0.850181	0.808571	0.463477	0.403458	0.575479	0.357646	0.701035	0.364553
L1PA2	endothelial	0.827165	1	0.639095	0.568901	0.265197	0.947338	0.925108	0.855479	0.6218	0.262383	0.1393	0.464208	0.0653053	0.583247	0.167765
AluSq	endothelial	1	0.982918	0.624647	0.469814	0.179485	0.840603	0.827281	0.82167	0.641412	0.201292	0.150583	0.202729	0.0747965	0.613753	0.160212
L1MC5a	endothelial	0.96401	1	0.667381	0.506037	0.473296	0.841119	0.885938	0.817317	0.744313	0.276877	0.422227	0.36545	0.124736	0.622797	0.193754
ERVL.E.int	endothelial	0.984111	1	0.591018	0.242927	0.327329	0.507947	0.971802	0.850751	0.642867	0.363686	0	0.459632	0.12297	0.467281	0.141747
LTR81B	endothelial	1	0.273451	0.452209	0.753786	0.683657	0.629839	0.49313	0.867676	0	0	0.854763	0	0.191111	0.270099	0.0398932
L1MA3	endothelial	0.902466	1	0.593841	0.413395	0.368954	0.682928	0.861153	0.644162	0.724342	0.238915	0.159649	0.379252	0.106248	0.537342	0.194421
AluSc8	endothelial	1	0.981728	0.711499	0.418139	0.146953	0.848901	0.829442	0.837147	0.705272	0.165335	0.256067	0.231199	0.100045	0.643363	0.182959
MIRc	endothelial	1	0.953152	0.622748	0.642552	0.694976	0.835516	0.947761	0.859261	0.821273	0.440706	0.402398	0.648673	0.313805	0.693487	0.369364
LTR49.int	endothelial	0.732727	1	0.382219	0.1522	0.106483	0.42752	0.17733	0.402902	0.599958	0.129807	0	0.238361	0.0866345	0.391086	0.0864079
LTR12	endothelial	0.38064	0.460857	0.134095	0	0.121598	0.0832619	0.279934	0.319619	1	0.469151	0	0.364195	0.206033	0.128382	0.100839
L1MD1	endothelial	0.865947	1	0.551231	0.378994	0.278947	0.647293	0.663589	0.668068	0.639156	0.22486	0.0594437	0.19559	0.142386	0.437643	0.14874
THE1B	endothelial	1	0.998924	0.515428	0.385146	0.283948	0.736336	0.883738	0.773904	0.671334	0.176463	0.170855	0.243921	0.123029	0.502193	0.18464
AluSq2	endothelial	0.999527	1	0.696336	0.541073	0.304129	0.855373	0.869434	0.876062	0.695032	0.325141	0.378323	0.418566	0.13654	0.688593	0.295809
MSTD	endothelial	0.960941	1	0.572086	0.617968	0.301189	0.670213	0.732264	0.684487	0.903497	0.155144	0	0.229059	0.259858	0.416288	0.145269
L1PB1	endothelial	0.93871	1	0.607268	0.585865	0.357963	0.770731	0.846346	0.779773	0.796974	0.371372	0.288209	0.461192	0.205659	0.691575	0.314613
AluJr	endothelial	0.979147	1	0.73036	0.598842	0.382187	0.90239	0.926952	0.903586	0.798193	0.41683	0.371657	0.55597	0.318269	0.746146	0.377575
L1MA4A	endothelial	0.763792	1	0.480348	0.357309	0.251449	0.575988	0.983001	0.591922	0.665642	0.308365	0.170727	0.336873	0.216655	0.539937	0.17848
MLT2B1	endothelial	0.752814	0.657655	0.0603753	0.353236	0.156807	0.481869	0.462766	1	0.98958	0.193882	0	0.51548	0.133952	0.416828	0.125138
AluSx	endothelial	0.99656	1	0.733609	0.583036	0.372308	0.883932	0.889628	0.881113	0.755427	0.404974	0.474104	0.490457	0.303479	0.737023	0.372522
MER57.int	endothelial	0.572138	0.645505	0.506402	0.239488	0.11928	1	0	0.173247	0.482142	0	0.739567	0.148314	0.204803	0.136648	0.0846443
L1MB1	endothelial	1	0.986005	0.605384	0.319076	0.358348	0.520215	0.762212	0.521821	0.581315	0.12112	0.203433	0.21242	0.101346	0.575793	0.132049
L3	endothelial	1	0.988102	0.697503	0.649622	0.610867	0.843043	0.9866	0.911957	0.797418	0.425654	0.321094	0.398431	0.243391	0.637867	0.287854
L1PB3	endothelial	1	0.952702	0.453828	0.320246	0.16427	0.582592	0.949145	0.458162	0.614841	0.190832	0.344366	0.233012	0.0634255	0.478829	0.130401
L1MB8	endothelial	0.969165	1	0.60621	0.579451	0.500992	0.791194	0.832782	0.762649	0.730293	0.367712	0.207251	0.419152	0.225218	0.647057	0.250107
L1MEf	endothelial	0.866229	0.90608	0.570639	0.538465	0.335233	0.663466	1	0.755269	0.769104	0.214907	0.218708	0.394197	0.196389	0.554755	0.233836
L1PA13	endothelial	1	0.973006	0.547625	0.492519	0.328006	0.638837	0.792933	0.869804	0.678577	0.27513	0.163394	0.260014	0.150687	0.562668	0.157957
L1ME1	endothelial	0.932992	1	0.660393	0.583484	0.495016	0.803177	0.921508	0.823081	0.764373	0.388019	0.383352	0.406927	0.210079	0.642685	0.286442
LTR49	endothelial	0.968763	1	0.508835	0.278839	0.354418	0.351093	0.286769	0.648404	0.262192	0.397555	0	0	0.119647	0.507909	0.0850605
L1PA17	endothelial	1	0.89534	0.628902	0.437033	0.248391	0.807993	0.593605	0.66501	0.823422	0.140159	0.178424	0.175493	0.0535614	0.421703	0.126709
MLT1A0	endothelial	1	0.951724	0.601099	0.242604	0.305032	0.663103	0.393144	0.477369	0.738864	0.25527	0	0.247552	0.145883	0.419985	0.175449
LTR32	endothelial	1	0.746971	0.568054	0.280532	0.0402819	0.84442	0	0.198978	0.399528	0.363656	0	0.116564	0.0881221	0.29375	0.15794
MLT2C1	endothelial	0.878182	1	0.144836	0.544235	0.541422	0.38099	0.505489	0.321238	0.661422	0	0	0.236343	0.041432	0.21084	0.10022
MIR	endothelial	0.997006	1	0.658782	0.686463	0.689091	0.829462	0.906873	0.853404	0.816775	0.527726	0.432598	0.619472	0.345453	0.736253	0.44015
L1ME4c	endothelial	1	0.999926	0.56803	0.471384	0.31078	0.700323	0.806982	0.680492	0.50817	0.161162	0.322331	0.224824	0.0534138	0.448074	0.117382
L1ME2	endothelial	0.918446	1	0.552769	0.600735	0.396865	0.75394	0.725469	0.765892	0.687295	0.30594	0.31274	0.354715	0.143286	0.547154	0.222478
L1MA2	endothelial	0.923603	0.934335	0.533458	0.49229	0.281373	0.677206	1	0.605965	0.668391	0.34492	0.310387	0.386266	0.156489	0.525787	0.165521
L1MB3	endothelial	1	0.936281	0.589701	0.410573	0.412778	0.698537	0.930431	0.75167	0.797101	0.31864	0.584785	0.638587	0.166063	0.581116	0.265259
L1MC3	endothelial	0.921279	1	0.534008	0.434433	0.355411	0.745811	0.859276	0.554571	0.680433	0.218544	0.115185	0.217954	0.128683	0.560294	0.200387
MER4B	endothelial	0.605276	1	0.331246	0.256721	0.209865	0.311794	0.68723	0.120998	0	0.108374	0	0.233317	0.105704	0.183085	0.105308
THE1A	endothelial	1	0.722077	0.306143	0.194034	0.146578	0.381823	0.472459	0.298369	0.512671	0.095689	0	0.179985	0.0299639	0.282551	0.0637735
LTR40A1	endothelial	0.194213	0.153603	0	0	0	0	0	0	1	0	0	0	0.144575	0.0765997	0.0473532
LTR8B	endothelial	0.858221	0.47307	0.19215	0.33589	0.16419	0.78408	0	0	1	0.386653	0	0.0860611	0.31605	0.194047	0.120769
MER11C	endothelial	0.548369	1	0.130491	0.148659	0.31228	0.232485	0.303482	0.248021	0.145563	0.133365	0.302383	0.164513	0	0.316946	0.0516305
MLT1E1A	endothelial	1	0.457355	0.270753	0.485069	0.269145	0.885222	0.604734	0.483344	0.899634	0.281446	0	0.0904397	0.112922	0.452654	0.138671
MIR3	endothelial	0.96394	1	0.640442	0.664993	0.631188	0.82537	0.896254	0.854752	0.744579	0.502944	0.449893	0.832443	0.340663	0.693406	0.408609
LTR7	endothelial	1	0.996232	0.75528	0	0.115957	0.652988	0.188115	0.454475	0.578433	0.0563092	0.322814	0.0454415	0.0384586	0.288986	0.0863776
LTR26	endothelial	0.618511	0.291225	0.576645	0.384445	0.190975	0.396116	0.319223	0.699576	0.509767	0.143653	1	0.689742	0	0.456896	0.166676
MER4A	endothelial	0.73089	1	0.393844	0.224974	0.2216	0.825042	0.631616	0	0.634696	0	0	0.244186	0.135652	0.348051	0.164873
AluSz6	endothelial	0.963373	1	0.705208	0.505939	0.263686	0.860468	0.858913	0.853205	0.725678	0.310998	0.373865	0.39195	0.19644	0.673064	0.251399
L1ME3E	endothelial	1	0.880728	0.772258	0.427593	0.293075	0.868526	0.755653	0.663066	0.814127	0.0902049	0.232195	0.274378	0.113219	0.456644	0.114497
MSTB1	endothelial	1	0.924485	0.203987	0.383346	0.267686	0.460451	0.975816	0.568296	0.44198	0.0798326	0.194228	0.18351	0.0601188	0.321039	0.128382
L1PA8	endothelial	0.972385	1	0.494821	0.395385	0.258302	0.712715	0.92474	0.7174	0.62188	0.287939	0.389999	0.281094	0.174044	0.555619	0.163423
L1MDa	endothelial	0.86894	1	0.629893	0.55684	0.186343	0.813318	0.797647	0.896463	0.727758	0.255462	0.221011	0.342477	0.12285	0.482391	0.170529
L1MEd	endothelial	0.954671	1	0.651935	0.55421	0.43075	0.789206	0.904304	0.749944	0.744486	0.391057	0.291448	0.363666	0.207043	0.619588	0.230229
L1M5	endothelial	1	0.998973	0.735766	0.596646	0.588915	0.872329	0.989435	0.840272	0.834121	0.405658	0.457661	0.462236	0.23861	0.710065	0.290655
MLT1J	endothelial	1	0.975323	0.463556	0.466466	0.419078	0.648144	0.435971	0.642584	0.685074	0.361661	0.162052	0.279205	0.118785	0.517002	0.190679
AluJr4	endothelial	0.958518	1	0.609333	0.473357	0.267933	0.800342	0.866349	0.832078	0.688097	0.187897	0.108104	0.309793	0.115773	0.619091	0.211621
AluSg4	endothelial	0.926704	1	0.57492	0.30029	0.063514	0.745858	0.616119	0.774716	0.589338	0.122771	0	0.142813	0.0686643	0.495539	0.0931362
THE1D	endothelial	1	0.904747	0.544605	0.430042	0.300642	0.592935	0.382718	0.733621	0.660961	0.247964	0.284001	0.228828	0.0620191	0.480412	0.142341
LTR33	endothelial	0.966492	1	0.533723	0.451387	0.377936	0.449742	0.675837	0.518821	0.663038	0.0813169	0.184169	0.158048	0.105902	0.428355	0.141486
MER66.int	endothelial	1	0.644574	0.247291	0.130745	0.143581	0.190179	0.558385	0.257919	0.183792	0	0	0.248027	0.240371	0.137373	0.108283
AluSx4	endothelial	0.99111	1	0.634959	0.375051	0.110777	0.805344	0.799323	0.838308	0.580461	0.215647	0.130178	0.252314	0.068661	0.58062	0.118933
MER67B	endothelial	0.95057	1	0.346774	0.064919	0.299251	0.314214	0	0	0	0.335134	0.584692	0.30603	0.319536	0.11747	0.255045
L1PA3	endothelial	0.941298	1	0.597747	0.528676	0.464755	0.77293	0.801389	0.86792	0.849885	0.352391	0.23601	0.256325	0.116908	0.634749	0.207007
L1ME4b	endothelial	0.942908	1	0.595127	0.464419	0.414915	0.827954	0.896886	0.782899	0.803528	0.382112	0.172163	0.345857	0.208344	0.58268	0.203798
MER4.int	endothelial	0.958883	1	0.734921	0.408651	0.195681	0.746857	0.563624	0.951101	0.525912	0.0985325	0.135015	0.289458	0.0510373	0.5623	0.17599
L1MD2	endothelial	0.929067	1	0.669911	0.527831	0.319967	0.849273	0.928524	0.770508	0.682218	0.251189	0.225428	0.261279	0.102161	0.599414	0.167663
LTR88c	endothelial	0.367991	0	0	0.501919	0.207215	0	1	0	0.48599	0	0	0	0.124771	0.0648823	0.0546261
MLT2D	endothelial	1	0.76499	0.532792	0.225092	0.202684	0.391248	0.760399	0.640821	0.486694	0.101247	0	0.222891	0.268726	0.413981	0.173325
MER66B	endothelial	0.739191	0.610496	0.462764	0.123835	0.377114	0.699087	1	0.670726	0.506012	0	0	0.972952	0.270549	0.282938	0.43664
LTR10D	endothelial	0.528421	0.944446	1	0.264295	0	0.551899	0.258423	0.081435	0.568716	0.176195	0	0.0873059	0.0560187	0.44001	0.0895723
L1PA6	endothelial	0.913679	1	0.591435	0.457443	0.312173	0.589843	0.655791	0.687627	0.772139	0.38166	0.360553	0.426994	0.110578	0.589543	0.252695
L1MCa	endothelial	0.688184	1	0.473254	0.411347	0.26508	0.576689	0.652252	0.573843	0.551113	0.329014	0.281959	0.303703	0.130276	0.47255	0.171797
L1PA11	endothelial	0.797998	1	0.492542	0.341203	0.200566	0.569182	0.500483	0.463289	0.353858	0.201498	0	0.157817	0.121008	0.418895	0.0922138
MER21C	endothelial	1	0.97066	0.390269	0.220478	0.265848	0.568539	0.410963	0.50886	0.53147	0.130804	0.12338	0.264096	0.126045	0.37162	0.190022
L1PA7	endothelial	0.960606	1	0.580959	0.618438	0.448174	0.794299	0.946572	0.833494	0.795764	0.448333	0.30186	0.422386	0.131435	0.684086	0.331022
MLT1F2	endothelial	0.71658	1	0.517396	0.442355	0.3112	0.654619	0.223971	0.666135	0.535991	0.263741	0.777474	0.250291	0.265068	0.353925	0.155166
MLT1A0.int	endothelial	0.55684	0.332856	0.258811	0	0.0481843	0.163102	1	0.236934	0.775823	0.416974	0	0.34062	0	0.243807	0.0710066
LTR17	endothelial	0.971347	1	0.244835	0.100224	0.0390631	0.244873	0.93664	0.141233	0.502229	0	0.397077	0	0	0.318645	0.0408504
LTR78B	endothelial	0.505384	0.666556	0.758343	0.340512	0.148989	0.532851	0	0	1	0.0627369	0	0.0829372	0.0428486	0.341254	0.0936054
CR1.L3A_Croc	endothelial	0.649822	0.821633	0	0	0	0.445778	1	0	0	0	0	0.177403	0	0.0773942	0.0131104
MLT1G3	endothelial	0.819905	1	0.540678	0.127915	0.241053	0.477128	0.935965	0.388633	0.745726	0.288675	0.436067	0.0977585	0.0311519	0.388214	0.185523
MSTA	endothelial	0.912815	1	0.42961	0.386907	0.466832	0.612449	0.486524	0.719467	0.554584	0.24581	0.388929	0.376759	0.204176	0.41142	0.163631
L1ME2z	endothelial	0.830845	1	0.539972	0.359325	0.315653	0.489937	0.753022	0.384972	0.593889	0.23372	0.560438	0.371927	0.0981349	0.419807	0.156241
AluYc3	endothelial	0.674044	1	0.618555	0.300192	0	0.694154	0.525158	0.473775	0.375497	0.0938106	0.122095	0.100033	0	0.306474	0.0334736
MLT1B	endothelial	0.928724	1	0.52684	0.358654	0.446973	0.627065	0.566302	0.55205	0.731458	0.343443	0.385532	0.499434	0.305	0.490931	0.249207
THE1B.int	endothelial	1	0.777099	0.312506	0.463585	0.491904	0.222409	0.0767682	0.580842	0.399834	0.400624	0.270322	0.25761	0.0465643	0.285247	0.178428
AluSx3	endothelial	1	0.987278	0.681071	0.488885	0.257061	0.857063	0.849615	0.884774	0.688841	0.322928	0.120681	0.299029	0.194782	0.674749	0.223849
L1ME3B	endothelial	0.961971	1	0.493725	0.511454	0.34696	0.824551	0.920275	0.606802	0.72328	0.252247	0.123084	0.286415	0.0324817	0.433253	0.151071
THE1C	endothelial	0.744442	1	0.566593	0.278731	0.151756	0.552824	0.452567	0.541639	0.414235	0.139347	0.11911	0.19022	0.133192	0.41475	0.100778
MLT1F	endothelial	1	0.905663	0.361965	0.377167	0.239364	0.595427	0.484468	0.612232	0.560112	0.136848	0	0.37889	0.150945	0.365725	0.166803
L1MEg	endothelial	0.965903	1	0.716473	0.531186	0.445624	0.799963	0.890581	0.845489	0.764561	0.307457	0.13944	0.352841	0.219006	0.593506	0.213209
HERVL.int	endothelial	0.770991	0.741692	0.374299	0.335009	0.375957	0.571957	1	0.122192	0.492325	0.218795	0.569495	0.215298	0.205488	0.557174	0.168094
L1P1	endothelial	0.873192	1	0.379431	0.314445	0.311517	0.472962	0.714467	0.622862	0.41147	0.179982	0	0.177827	0.0290102	0.291958	0.0908018
L1MB7	endothelial	0.991616	1	0.610708	0.617018	0.546143	0.780753	0.994252	0.910266	0.815623	0.392125	0.369435	0.489101	0.203033	0.649687	0.287866
AluSg7	endothelial	0.933897	1	0.525433	0.308606	0.0992195	0.756959	0.766895	0.766269	0.591398	0.134755	0.17396	0.12722	0.0585278	0.490905	0.101311
THE1C.int	endothelial	1	0.625346	0.170799	0.174412	0.296845	0.165859	0	0	0.198329	0.433068	0.40765	0	0.0322366	0.210222	0.0732459
LTR43	endothelial	0.294852	0.302701	0.0770699	0	0	0.138018	1	0.353756	0	0.17136	0	0.275953	0	0.158789	0.121948
L1MEc	endothelial	0.973668	1	0.589443	0.559781	0.42354	0.765783	0.905009	0.832702	0.811913	0.413947	0.255763	0.426207	0.247164	0.62412	0.246257
L1M3a	endothelial	0.503953	0.467728	0.168154	0.27811	0.360451	0.188697	1	0.0975733	0.332558	0.093475	0	0.0498777	0.0681445	0.103106	0.057734
L1MC5	endothelial	0.983786	1	0.603199	0.553257	0.390547	0.804807	0.905045	0.87454	0.714728	0.325579	0.221126	0.325509	0.15522	0.595098	0.232516
L1MB4	endothelial	0.915532	1	0.583142	0.499331	0.39714	0.68718	0.772503	0.595126	0.788914	0.201038	0.0622101	0.235703	0.155187	0.504042	0.165181
L1ME3F	endothelial	0.781747	1	0.431248	0.42147	0.360688	0.521043	0.719752	0.657935	0.513623	0.167472	0.0722555	0.213349	0.0480928	0.418896	0.127736
MLT1O	endothelial	0.944374	1	0.57073	0.324412	0.387278	0.649457	0.544341	0.399792	0.245706	0.149667	0.230511	0.170866	0	0.320706	0.101453
MSTB.int	endothelial	1	0.62323	0.325	0.0739521	0.231323	0	0	0	0	0.320229	0	0.144747	0	0.106847	0.0972475
LTR12C	endothelial	0.319129	0.405416	0.0485567	0.118863	0.168307	0.110674	0.177172	0.103963	0.164114	0.462187	0.718267	1	0.49933	0.233817	0.809772
MER11B	endothelial	0.483042	1	0.287103	0.0410783	0.174603	0.317231	0.203439	0	0.69685	0	0.551964	0	0	0.274561	0.0646177
MLT1D	endothelial	0.877391	1	0.606525	0.435462	0.311637	0.624156	0.511385	0.781036	0.567449	0.213651	0.124695	0.459488	0.165255	0.456311	0.208678
L1MEg2	endothelial	0.736932	1	0.365066	0.231711	0.114185	0.435237	0.294736	0	0.250866	0.0903185	0	0.107928	0	0.141038	0.0609661
L1MA5	endothelial	0.622841	0.674896	0.401353	0.293153	0.153791	0.548094	1	0.496102	0.8477	0.112512	0.172591	0.112729	0.109011	0.540702	0.0695965
L1ME3	endothelial	1	0.932567	0.563332	0.40528	0.378148	0.791255	0.727231	0.646335	0.687189	0.263003	0.250249	0.383163	0.0569061	0.482435	0.147414
MER65A	endothelial	1	0.93123	0.658157	0	0.301791	0.745784	0.783169	0.106122	0.599803	0	0	0.562931	0.151085	0.338473	0.239847
L1M1	endothelial	0.534185	0.666987	0.352238	0.324234	0.286604	0.425226	0.609876	0.376074	0.412364	0.513601	0.74326	1	0.106672	0.425281	0.558459
L1ME3C	endothelial	0.941344	1	0.445267	0.357211	0.327782	0.491143	0.715798	0.837154	0.420228	0.221511	0.277545	0.274607	0.0663786	0.486539	0.120685
HERVK22.int	endothelial	0.782588	0.391158	0.605551	0.719033	0.550724	0.717843	0.752374	0.532304	0.460115	0.257482	0	0.970019	0.22982	1	0.429708
MLT2B3	endothelial	0.981717	1	0.238143	0.51385	0.300075	0.648344	0.58647	0.855963	0.779477	0.540422	0.300126	0.391538	0.10143	0.669835	0.504847
LTR86C	endothelial	0.399474	0	1	0.27706	0	0.269275	0	0	0	0	0	0	0.171275	0.812077	0.112691
ERVL.B4.int	endothelial	1	0.770682	0.289286	0.107628	0.237487	0.298991	0.16743	0.160572	0.378056	0.225151	0	0.276203	0.0525689	0.25624	0.0909063
LTR40a	endothelial	0.945567	1	0.609711	0.570463	0.239779	0.533747	0.457981	0.328702	0.390353	0	0	0.14651	0.213054	0.205327	0.0912651
L1M2	endothelial	0.97109	1	0.654363	0.543572	0.459101	0.824983	0.952441	0.755564	0.634188	0.312818	0.30029	0.203964	0.174968	0.604958	0.197087
LTR16B	endothelial	0.360388	0.426423	0.609964	0.238862	0.209868	0.531278	1	0	0.331444	0	0	0	0	0.707042	0.234117
L1PREC2	endothelial	0.863776	1	0.408604	0.41267	0.268206	0.761947	0.680859	0.693202	0.658665	0.194947	0.141013	0.2218	0.107328	0.492723	0.141798
MER39	endothelial	0.541375	1	0.310925	0.253789	0.191757	0.35688	0.216926	0.0639006	0.316478	0.116854	0	0.0937888	0.0714096	0.278922	0.116113
L4_A_Mam	endothelial	0.920879	0.899767	0.463865	0.265975	0.479398	0.628451	1	0.739625	0.47785	0.242601	0.481581	0.290815	0.197725	0.452442	0.164657
L1MA4	endothelial	0.856416	1	0.549858	0.52487	0.35032	0.821587	0.93016	0.747328	0.779854	0.408838	0.307195	0.252783	0.088353	0.568173	0.190103
FLAM_C	endothelial	0.93229	1	0.604109	0.47399	0.249339	0.982849	0.791659	0.887967	0.652999	0.274114	0.402639	0.610362	0.157839	0.638241	0.20155
MER21.int	endothelial	0.492629	0.805075	0.31387	0.14295	0.239876	0.448227	1	0.664987	0.33355	0.0792557	0	0	0.072383	0.588979	0.110435
L1M3	endothelial	0.908022	1	0.581691	0.426788	0.250857	0.746692	0.658416	0.845727	0.542268	0.237146	0.128723	0.191812	0.0497077	0.482282	0.119054
LTR108a_Mam	endothelial	0	0	0	0	0	0	0	0	0	0	0	1	0	0.076107	0.0930423
HERVE_a.int	endothelial	0.140232	0.230192	0	0	0	0	0.210493	0	1	0	0.684593	0.537718	0.461667	0.0762884	0.125386
MLT1E1	endothelial	0.273283	0.510904	0.464427	1	0.265524	0.227442	0	0	0	0.180852	0	0.588935	0	0.176784	0.10363
L1MA1	endothelial	0.697028	0.834515	0.412657	0.338243	0.197394	0.428556	1	0.588943	0.402618	0.167271	0.0743333	0.261882	0.0539624	0.320399	0.120985
L1PA15.16	endothelial	0.376872	1	0.143798	0.172778	0.120755	0.364936	0.664045	0.230867	0.292652	0.355614	0.188869	0.0918492	0.168849	0.347743	0.215018
L1M4c	endothelial	0.841237	1	0.566978	0.422168	0.297728	0.585568	0.979063	0.712524	0.788079	0.175045	0.102036	0.184631	0.0496809	0.595931	0.146276
L1MA5A	endothelial	1	0.932498	0.529017	0.372198	0.304702	0.675623	0.774448	0.809554	0.64344	0.221023	0	0.219041	0.291356	0.49107	0.154416
L4_C_Mam	endothelial	0.81592	1	0.429625	0.32742	0.315209	0.346948	0.679486	0.487538	0.969377	0.212057	0	0.249683	0.0697399	0.378326	0.123283
THE1A.int	endothelial	1	0.690408	0.161696	0.307436	0.165247	0.619209	0	0.233122	0.4251	0.154667	0.353295	0.150943	0.145725	0.208204	0.0976654
HAL1ME	endothelial	1	0.983353	0.564875	0.341014	0.359561	0.70451	0.902656	0.60763	0.521353	0.161662	0.0889001	0.234499	0.0708274	0.491869	0.133037
MER31B	endothelial	0.551207	1	0.77673	0.347195	0.231724	0.309222	0.711793	0.781429	0.163189	0	0	0.298142	0	0.261923	0.0680678
HERVK11.int	endothelial	1	0.41574	0.10313	0.219235	0.246575	0.0989806	0.397341	0	0.259103	0.322933	0	0.205853	0.222049	0.118262	0.092607
HUERS.P1.int	endothelial	1	0.752119	0.531614	0.129827	0	0.334088	0.393047	0.233224	0.436084	0.403228	0	0	0.319378	0.129711	0.0768219
L1PA14	endothelial	0.829794	1	0.425447	0.165096	0.16026	0.610331	0.601484	0.569585	0.598735	0.239589	0.109266	0.126259	0.131024	0.366368	0.121794
MLT1L	endothelial	0.997546	1	0.406547	0.357878	0.366754	0.459715	0.566936	0.616104	0.680559	0.235569	0	0.255755	0.140221	0.460671	0.145737
MLT1I	endothelial	1	0.850474	0.604267	0.448537	0.378215	0.532013	0.481658	0.548419	0.642257	0.203033	0.209195	0.151033	0.158786	0.478959	0.222019
L1ME4a	endothelial	0.965038	1	0.649723	0.622375	0.527997	0.831901	0.886247	0.843543	0.752336	0.407586	0.453654	0.438634	0.22465	0.646868	0.232329
HERV9.int	endothelial	0.249337	1	0	0.227242	0.252089	0	0	0	0.327348	0.0870162	0	0.321131	0	0.154309	0.0844541
MSTB2	endothelial	0.589851	1	0.132374	0.146785	0.0475758	0.369158	0.253713	0.808149	0.381622	0.0507527	0	0.0868259	0	0.332702	0.0410585
L1PBa	endothelial	0.955779	1	0.541034	0.502035	0.174946	0.490277	0.765063	0.390492	0.754177	0.200757	0.467136	0.791161	0.317402	0.622594	0.505852
AluYb8	endothelial	0.721903	0.958596	0.676465	0.266842	0.0768639	1	0.698005	0.813028	0.458537	0.0718858	0.445964	0.272325	0.0135277	0.675215	0.105075
AluYm1	endothelial	0.996932	1	0.526097	0.380425	0.110577	0.875511	0.735741	0.822434	0.519326	0.169292	0	0.138142	0.0531036	0.571795	0.0983594
AluYa5	endothelial	1	0.961666	0.543256	0.336926	0.058712	0.929939	0.875487	0.851671	0.694255	0.171406	0.259718	0.458653	0.0135525	0.622686	0.24925
LTR56	endothelial	1	0.491597	0.375781	0.585201	0.266654	0.334317	0.480343	0	0.155098	0.118091	0	0.448071	0	0.514883	0.0873344
L1ME3G	endothelial	1	0.982886	0.587986	0.53827	0.421829	0.749674	0.935689	0.673181	0.768311	0.333706	0.293797	0.327034	0.243284	0.561588	0.195916
LFSINE_Vert	endothelial	1	0.758809	0.548534	0.189527	0.249968	0.554066	0.266205	0.842762	0.138838	0.339381	0	0.253528	0.0508939	0.396562	0.0741214
HERVL18.int	endothelial	0.213496	0	0.38431	0.465438	0	0	0	0	0	0.52734	0	0.711396	1	0	0.621177
L1P2	endothelial	0.857816	0.99281	0.618765	0.482481	0.22015	0.655123	1	0.739983	0.754117	0.286353	0	0.309753	0.0860701	0.497911	0.17054
MLT1H1	endothelial	1	0.886818	0.444754	0.407914	0.277376	0.471455	0.232153	0.638048	0.787378	0.245112	0.363179	0.289246	0.270187	0.417623	0.24083
L1M4	endothelial	0.922262	0.959353	0.62898	0.506968	0.403361	0.760943	1	0.750244	0.805476	0.34446	0.136414	0.433946	0.16217	0.62803	0.222582
L1M4b	endothelial	0.913386	1	0.461936	0.335237	0.21335	0.594588	0.733743	0.477978	0.512073	0.274979	0.600567	0.390645	0.218704	0.625653	0.158014
L1MB2	endothelial	0.936406	1	0.509627	0.360437	0.304051	0.551971	0.890699	0.678472	0.752486	0.311116	0.156452	0.244321	0.237931	0.580611	0.156575
MLT2F	endothelial	0.445628	0.323801	0.376204	0.316877	0.184053	0.336486	0.721894	1	0.116251	0.126869	0	0.185086	0.151218	0.234972	0.0892067
LTR27C	endothelial	0.33769	1	0	0.600391	0	0.661997	0	0	0	0.649173	0	0	0	0.361898	0.0780854
L1PA12	endothelial	1	0.687414	0.49217	0.291367	0.114696	0.687183	0.856813	0.512947	0.633148	0.396782	0.477857	0.436193	0.125425	0.410977	0.153913
LTR41	endothelial	0.515887	1	0.0335664	0.446306	0.127993	0.574962	0.535859	0.381743	0.598937	0.126131	0	0.236803	0.151258	0.501782	0.10318
HERVK.int	endothelial	0.5202	0.54672	0.328502	0.461515	0.677496	0.361798	0.160796	0.3621	1	0.0921845	0	0.247964	0.244093	0.421795	0.142647
L1MD3	endothelial	0.842029	0.962272	0.587281	0.290592	0.2646	0.73522	1	0.583297	0.741634	0.198999	0.0926854	0.26461	0.11124	0.44654	0.131186
ERV3.16A3_I.int	endothelial	0.600692	1	0.325843	0.395972	0.257176	0.576444	0.349268	0.416356	0.962619	0.31051	0.769564	0.156104	0.0307793	0.651001	0.248758
L1PA5	endothelial	0.961348	1	0.608093	0.453388	0.389381	0.788158	0.732761	0.729665	0.76171	0.339862	0.275789	0.431478	0.152382	0.624727	0.231225
L1MA7	endothelial	0.90168	1	0.64178	0.433771	0.327343	0.705719	0.814013	0.821935	0.628238	0.214985	0	0.261544	0.134911	0.643062	0.14405
MIR1_Amn	endothelial	0.898802	1	0.448947	0.28007	0.502546	0.515834	0.362249	0.878036	0.665323	0.158937	0.499965	0.348402	0.130191	0.587722	0.179451
MER61.int	endothelial	0.700409	0.922103	0.346829	0.437819	0.303259	0.66683	1	0.612365	0.36886	0.226612	0.467931	0.416532	0.108829	0.547922	0.162326
LTR86B2	endothelial	0.275746	0	0.0747924	0.193536	0.134184	0	1	0.560279	0	0	0	0	0	0.0472147	0.0399253
L1MA6	endothelial	1	0.951955	0.568907	0.517857	0.261633	0.595327	0.798475	0.596937	0.917757	0.280763	0.187837	0.445958	0.13307	0.532127	0.155314
LTR1E	endothelial	0	0	0	0	1	0	0	0	0.853754	0	0	0	0	0.178625	0.0698559
L1PB2	endothelial	0.763785	1	0.421107	0.345799	0.246688	0.608514	0.989115	0.606888	0.741571	0.143293	0	0.223007	0.0655235	0.535335	0.0977622
MER4A1_	endothelial	1	0.734952	0.32463	0.162143	0.16795	0.442969	0	0.479358	0	0	0	0	0	0.256572	0.145681
MLT1J2	endothelial	0.940334	1	0.453618	0.402945	0.226553	0.329839	0.35691	0.60275	0.628796	0.201838	0	0.271738	0.0887096	0.366379	0.153304
L1MCb	endothelial	0.734101	1	0.174025	0.36225	0.0782082	0.48611	0.42781	0.621926	0.431178	0.0900855	0.408271	0.362578	0.0289112	0.303647	0.113348
LTR3A	endothelial	0.53426	0.334545	0.131995	0	0.151825	0.263199	0	1	0	0.0439936	0	0.143989	0	0.228416	0.0698518
LTR45	endothelial	0	0	0	0	0	0	0	1	0	0	0	0	0.334961	0	0.304291
LTR40c	endothelial	0.938009	0	0.514309	0.285802	0.18589	0.431195	0	0.527058	1	0.101456	0	0.173644	0	0.49487	0.231203
LTR8	endothelial	1	0.59983	0.837707	0.557288	0.362268	0.759053	0.433409	0.564501	0.868376	0.666419	0.47822	0.687093	0.302649	0.561061	0.381847
LTR18A	endothelial	0	0.402672	0	0	0	0	0	0	0	0	0	1	0.567633	0.077713	0.261985
L1MEb	endothelial	0.772558	1	0.510185	0.267597	0.217978	0.529606	0.941279	0.793684	0.619944	0.107776	0.181062	0.0973658	0.0340598	0.330137	0.0576558
LTR1B1	endothelial	0	0	0	0	0	0	0	0	0	0	0	1	0.928863	0.136034	0.0335659
L1PB4	endothelial	0.793587	1	0.542922	0.434519	0.275868	0.762293	0.967667	0.809158	0.616067	0.184935	0.146107	0.241627	0.146009	0.506229	0.162352
L1ME3A	endothelial	0.928774	1	0.539802	0.540967	0.461965	0.700625	0.917436	0.764732	0.672355	0.272684	0.183545	0.348741	0.139348	0.572782	0.171568
LTR50	endothelial	0.956984	1	0.249061	0.636994	0.271213	0.485398	0.679405	0.155436	0.76804	0	0	0.04277	0.0732993	0.265433	0.112967
LTR1B0	endothelial	0	1	0	0	0	0	0	0	0	0	0	0	0	0	0
MER52.int	endothelial	0.367173	0.133105	0.458155	0	0.0947535	0	1	0.315925	0	0.098417	0	0	0.230027	0	0.0119206
MER70C	endothelial	0.564361	0	0.667243	0	0	0	1	0	0	0	0	0	0.334722	0.0770671	0.0989761
L1MA8	endothelial	0.88965	1	0.516542	0.457888	0.374591	0.648585	0.678102	0.769909	0.652945	0.292992	0	0.225697	0.0816202	0.452654	0.131661
L1PA15	endothelial	0.973539	1	0.674185	0.501667	0.330222	0.856403	0.960876	0.806819	0.695976	0.454084	0.291257	0.242924	0.14024	0.654459	0.196438
L1MC	endothelial	0.976827	1	0.523055	0.295239	0.252769	0.666115	0.805822	0.621745	0.848594	0.3521	0.329371	0.342247	0.0694336	0.399066	0.152316
L1PA16	endothelial	0.93915	1	0.625107	0.497801	0.375011	0.704917	0.962888	0.50462	0.825278	0.257228	0.290422	0.413278	0.161356	0.627852	0.246329
MLT1E2	endothelial	0.819759	1	0.335274	0.307413	0.305415	0.409683	0.768605	0.674225	0.388467	0.0607775	0.192524	0.118045	0.100613	0.270741	0.100503
MamGypLTR1b	endothelial	0.556518	1	0.889002	0.355732	0.259624	0.529716	0	0	0	0.114465	0	0	0	0.416975	0.0267618
LTR85a	endothelial	1	0.767156	0.224881	0	0.109063	0.658804	0	0.352273	0.222369	0.103709	0	0.184466	0.294728	0.136014	0.102478
HERVH.int	endothelial	0.85621	1	0.332224	0.222675	0.176574	0.527761	0.643486	0.557967	0.416496	0.152153	0.278736	0.173452	0.1281	0.384731	0.109099
LTR33B	endothelial	1	0.592929	0.233799	0	0.324306	0.294097	0	0.405331	0.259985	0.669354	0	0.237969	0.165759	0.440797	0.0936416
LTR9D	endothelial	0.644759	0.761141	0.224178	0	0.328765	1	0	0.523812	0	0	0	0.193785	0	0.264874	0.0528637
LTR14B	endothelial	0.0579455	0.404375	0.484076	0	0.109043	0	0.792564	0.191208	0.844331	0.0734978	0	0	0	1	0.0421575
MER51A	endothelial	0.848463	0.877159	0.886603	0.532417	0.147248	0.757014	1	0.810182	0.306582	0.48323	0	0.281338	0.130909	0.445945	0.156581
MLT2A1	endothelial	0.502645	1	0.198726	0.0932856	0.135858	0.797343	0.54772	0.194536	0.374029	0.0398702	0.307241	0.0429836	0.0394881	0.230483	0.0835729
LTR104_Mam	endothelial	0.716354	0.826509	0	0.171403	0.548699	0.377489	0.555016	0.604822	0.28112	0	1	0.19568	0	0.666061	0.191393
MER52C	endothelial	0.282197	0.503579	0.081957	0.13511	0.364345	0	0.257824	0	1	0	0	0	0.145617	0.158786	0.108538
HERVL40.int	endothelial	0.957548	0.659788	0.229123	0.488024	0.158558	0.487658	0.764445	1	0.391765	0	0.710035	0	0	0.347044	0.0476604
L1MCc	endothelial	0.925652	0.534415	0.419664	0.28071	0.235332	0.44038	0.435774	0.39532	1	0.15645	0	0.0577682	0.0864915	0.323458	0.0955794
L4_B_Mam	endothelial	0.980839	0.996794	0.29534	0.396572	0.106629	0.886939	1	0.510808	0.639457	0.0825115	0.128152	0.134547	0.0458373	0.463848	0.123238
LOR1.int	endothelial	0.758214	1	0.43425	0.272478	0.182269	0.603533	0	0.519032	0.837211	0.194087	0	0.0810892	0.0269258	0.607159	0.105078
MLT2B5	endothelial	1	0	0	0	0	0	0	0	0	0	0	0	0	0	0.122101
MER39B	endothelial	0.736281	1	0	0.472214	0.293854	0	0.614819	0.438279	0.722212	0	0.630764	0.243654	0.082754	0.160438	0.12995
MER65.int	endothelial	0.61102	0.944664	0.370341	0.259504	0.0529782	0.81802	1	0.489111	0.409131	0.658711	0.284475	0.866981	0.0330976	0.337859	0.135152
MER31A	endothelial	0.90294	1	0.174251	0.451833	0.222037	0.228957	0.860016	0.407256	0.374884	0.126508	0	0.125317	0.0356836	0.258816	0.0608656
MLT1N2	endothelial	1	0.6022	0.407481	0.326839	0.191691	0.224363	0.274288	0.689238	0.276878	0.0994535	0	0.171575	0.238359	0.437087	0.149805
LTR10C	endothelial	1	0.925369	0.230432	0.118075	0.100935	0.531665	0.294986	0.43958	0.35134	0.203305	0	0.380804	0.199813	0.154202	0.0634653
L1M7	endothelial	0.761798	1	0.414267	0.245614	0.251961	0.499948	0.70444	0.49659	0.436362	0.107779	0	0.159835	0.0900217	0.271124	0.0768087
LTR89	endothelial	0.66394	0.955804	0.337358	0.0607019	0	0.171172	0.231633	1	0	0	0	0	0.186688	0.157581	0.0432503
MSTB1.int	endothelial	0	0	0	0	0	0.427688	0	0	0	0	0	0	0	1	0.273508
MER41B	endothelial	0.759527	0.780197	0.181579	0.212953	0.154626	0.524191	1	0.607529	0.136878	0.391099	0	0.221163	0.0515422	0.178465	0.102967
Plat_L3	endothelial	0.872211	1	0.603151	0.226244	0.300345	0.348717	0.399367	0.411573	0.363718	0.142795	0.369781	0.229103	0.0218178	0.347813	0.126744
MLT1A	endothelial	0.76977	1	0.622757	0.384351	0.254371	0.484498	0.770077	0.538152	0.573518	0.312071	0	0.166933	0.136283	0.270614	0.0978046
Alu	endothelial	0.655003	0.79076	0.447491	0.10606	0.0624554	0.700336	0.227047	1	0.125682	0.0796239	0	0.139118	0	0.348252	0.0554413
LTR16C	endothelial	1	0.899119	0.271581	0.546436	0.366761	0.786131	0.744246	0.8778	0.889421	0.368341	0	0.497209	0.120783	0.53585	0.189042
MamRep1527	endothelial	0.450299	0.15079	0.326065	0.153714	0.0257476	0.468257	0	0.158293	0.248304	0	1	0.397907	0.129702	0.0496424	0.0852972
LTR12F	endothelial	0.217897	1	0.791588	0.173654	0.189479	0.778824	0.540033	0.434475	0.512398	0.0727803	0	0.129454	0	0.258157	0.0718441
AluYj4	endothelial	0.928851	1	0.395116	0.252429	0.066213	0.544652	0.332399	0.485926	0.654324	0.105073	0	0.0984447	0	0.541879	0.0644558
FLAM_A	endothelial	0.851218	1	0.525074	0.419814	0.270641	0.869954	0.965536	0.726228	0.542462	0.153729	0.0580384	0.287836	0.123617	0.539713	0.142245
L1PB	endothelial	1	0.836714	0.509786	0.340198	0.248552	0.580428	0.385692	0.783414	0.520078	0.0557303	0	0.256276	0	0.383793	0.0802772
AluSc5	endothelial	0.961997	1	0.553555	0.36044	0.104503	0.783825	0.670744	0.751349	0.450774	0.124345	0.0480869	0.128834	0.059915	0.491381	0.0826386
HAL1M8	endothelial	0.723146	1	0.6801	0.213607	0.206064	0.619535	0.757053	0.585393	0.794338	0.185704	0.260015	0.12782	0.111828	0.383261	0.102818
LTR103b_Mam	endothelial	0.435337	0.7869	0.14102	0.35973	0	0.734766	0	1	0.776054	0	0	0	0.245753	0.140415	0.0887472
MLT1H2	endothelial	0.806907	1	0.41034	0.282476	0.15685	0.323305	0.524818	0.313188	0.443809	0.220671	0.161806	0.325719	0.256939	0.242213	0.104097
MER4D1	endothelial	0.539662	1	0.189059	0.165026	0.0696668	0.150217	0.466942	0.324301	0.328681	0.0484526	0	0.0695507	0.136092	0.111069	0.0436002
MER4CL34	endothelial	1	0.854081	0.728215	0	0	0.245106	0.395276	0.17964	0	0.0409714	0	0	0.216879	0.191281	0.103458
L5	endothelial	0.302146	0.746368	0.445953	0.202285	0.259218	0.211052	0.184783	0.220976	1	0.128783	0	0	0	0.382421	0.0762223
MLT1H	endothelial	0.755341	1	0.540342	0.390735	0.273454	0.575253	0.670435	0.681471	0.463637	0.375228	0	0.303464	0.213753	0.386454	0.195348
FAM	endothelial	1	0.969393	0.495897	0.387951	0.16155	0.930164	0.971066	0.77353	0.583421	0.284724	0	0.195623	0.0952315	0.453337	0.0785506
MER65D	endothelial	0.779271	1	0.110327	0	0.170204	0.464897	0	0	0.355706	0.18747	0	0.199313	0	0.25485	0.195515
LTR37A	endothelial	0.700691	0.239428	0.266888	0.239139	0.284591	0.640271	0.360789	0.683916	0.489004	0.063235	1	0.057412	0.0361513	0.344161	0.0634678
AluYh3	endothelial	0.846109	1	0.41127	0.245133	0.0302757	0.666619	0.679793	0.758117	0.620944	0.0345247	0.08732	0.0559643	0.0372852	0.372709	0.0412713
MER31.int	endothelial	1	0.825521	0.475932	0.391776	0.150428	0.355136	0.168081	0.909264	0.246975	0.14078	0	0.339944	0.195698	0.365087	0.0503151
MER92.int	endothelial	1	0.589114	0	0.0903281	0.167137	0.323823	0.585252	0.432398	0.580603	0.0997752	0.715313	0	0.0640468	0.249759	0.0510221
MER34A	endothelial	0.830092	0.466851	0.589938	0.253194	0.18016	0.451829	1	0.734715	0.209531	0.472198	0	0.659877	0.108746	0.261179	0.0971896
MSTA1	endothelial	1	0.526769	0.661065	0.114335	0	0	0.715886	0	0.627532	0	0	0	0	0.187292	0.0602043
MER4A1	endothelial	1	0.953932	0.307804	0.409681	0.218913	0.75456	0.327229	0.286377	0.702216	0.0996012	0	0.129701	0.0909017	0.188382	0.0850087
AluYc	endothelial	0.999872	1	0.550058	0.251933	0.1271	0.767227	0.799549	0.780617	0.552481	0.111535	0.0703188	0.139945	0.0251164	0.445465	0.0795362
AluYf1	endothelial	0.947215	0.955305	0.376319	0.23751	0.0533557	1	0.539572	0.580853	0.574593	0.0752439	0.103894	0.31274	0	0.414377	0.0434142
L1MC4a	endothelial	1	0.995419	0.559484	0.43304	0.384246	0.823288	0.883207	0.677999	0.85776	0.247165	0.263584	0.386846	0.158018	0.636929	0.206448
LTR9B	endothelial	0.772798	0.966487	0.826191	0.608077	0.267529	0.563824	0.567198	0.168428	1	0	0.732394	0	0.0423437	0.239978	0.139253
MER4E1	endothelial	0.725791	1	0.125681	0.0859426	0.0769976	0.28547	0.306671	0.263691	0.232277	0.0329427	0	0	0.0689138	0.20656	0.0469458
MLT1E3	endothelial	0.592108	1	0.41475	0.297045	0.191834	0.280123	0.227005	0.455999	0.0891752	0.0985499	0	0	0	0.218358	0.0567543
LTR37B	endothelial	0.428225	0.379936	0.265565	0.227837	0.209988	0.175317	1	0.278093	0.381594	0	0	0.0732722	0.0323656	0.198725	0.048287
LTR39	endothelial	0.934305	1	0.42181	0.230462	0	0	0.553483	0	0.15297	0	0	0	0.151907	0.214025	0.0624448
L1ME3D	endothelial	0.794377	0.894415	0.592314	0.315099	0.303662	0.585163	1	0.73902	0.753814	0.0352234	0.427406	0.210578	0.0446699	0.346757	0.0956411
L1P4	endothelial	0.801	1	0.435035	0.2529	0.199694	0.511903	0.723734	0.628544	0.599696	0.170067	0	0.226164	0.0456896	0.447751	0.0939124
LTR22C2	endothelial	0.363376	0	0	0	0	0	0	0	1	0	0	0	0	0	0.0647696
L1PA10	endothelial	0.968125	1	0.5608	0.528807	0.182361	0.677221	0.857284	0.651021	0.754642	0.224001	0.224779	0.358541	0.0897296	0.522771	0.177457
ERVL.int	endothelial	0.401185	1	0.108336	0	0.063711	0.0761603	0.567351	0	0.374239	0	0	0	0	0.200703	0.0411003
MLT1H1.int	endothelial	0	1	0.398462	0	0	0	0	0	0.413304	0	0	0.383857	0	0.482564	0.00755228
LTR64	endothelial	1	0	0.192741	0	0	0	0	0.674232	0	0	0	0	0.479644	0.108252	0.0770524
MLT1F1	endothelial	0.73613	1	0.382666	0.158153	0.171094	0.445527	0.610726	0.0999369	0.35813	0.263339	0	0.227917	0.0162379	0.352426	0.129133
FRAM	endothelial	0.989925	1	0.629807	0.322608	0.168633	0.890114	0.632102	0.803235	0.484215	0.110709	0.0774074	0.176939	0.110687	0.532649	0.0935329
MER67C	endothelial	1	0.373271	0.202397	0.263554	0.290659	0	0	0.449706	0.968707	0.272332	0	0.284942	0.148042	0.765259	0.129014
LTR67B	endothelial	1	0.603546	0.642506	0.316894	0.255356	0.406609	0.293336	0	0.635734	0.165927	0	0.334107	0.333022	0.318809	0.190891
LTR79	endothelial	1	0.712944	0.211568	0.362691	0.320322	0.280596	0.603838	0.430325	0.673855	0.151461	0	0.370199	0.0391456	0.328083	0.155987
L1M8	endothelial	0.631053	1	0.347483	0.196158	0.156101	0.63163	0.369499	0.262394	0.794912	0.0744831	0	0.0641922	0.00961747	0.457838	0.0591869
MER41D	endothelial	0.519091	0.612815	0.220226	0.229715	0.678822	0	0	1	0	0.223417	0	0	0	0.631892	0.054066
MLT1A1	endothelial	0.870374	1	0.476152	0.325361	0.21266	0.546223	0.586888	0.929591	0.790432	0.321275	0.153409	0.421902	0.103916	0.436701	0.159031
LTR78	endothelial	0.678656	0.669421	0.18776	0.348424	0.330463	0.406201	1	0.397091	0.361616	0.0823109	0	0.535146	0.256442	0.444537	0.342524
LTR2C	endothelial	0.957063	1	0.505546	0	0	0	0	0	0	0	0	0	0.578903	0.256119	0.109746
LTR57.int	endothelial	0.743681	1	0	0.258479	0.0599403	0.534558	0	0	0	0	0	0	0	0.512683	0.0602438
HERVK9.int	endothelial	1	0.607445	0.288143	0.183293	0.299193	0.162594	0.353385	0.182662	0.691352	0.234536	0.438783	0.139875	0.0726922	0.270018	0.144779
MER9a2	endothelial	0.655475	1	0.0641453	0.524482	0.130942	0	0	0.361576	0.707514	0	0	0	0	0.15715	0.0803979
MER67A	endothelial	1	0.90928	0	0.434864	0.185313	0.190726	0.439868	0.865254	0	0.609799	0	0.540631	0.164911	0.313988	0.191952
HERV16.int	endothelial	0.251852	0.246105	0.15576	0.165405	0.0504029	0.0585637	0	0	1	0	0	0.234938	0.0864431	0.397886	0.0922107
MLT1G1	endothelial	1	0.783255	0.394784	0.324463	0.327881	0.229294	0.493423	0.199904	0.379213	0.0996806	0	0.131031	0.0395251	0.24888	0.166605
L1MD	endothelial	1	0.989766	0.690411	0.439139	0.230132	0.690568	0.961535	0.844408	0.703035	0.299699	0.275074	0.192191	0.126883	0.524954	0.151506
LTR13A	endothelial	0.681423	0.691957	0.425973	0.222881	0.0476472	0.147472	0	0.432447	0.205245	0.441807	0.4337	1	0.453259	0.303544	0.254082
MER49	endothelial	0.971595	1	0.491713	0.419295	0.110478	0.467909	0.183225	0.941339	0.752439	0.467399	0.484893	0.474946	0.0577679	0.482583	0.131228
MER50	endothelial	1	0.819927	0.285819	0.73219	0.519918	0.793863	0.369283	0.426834	0.257646	0.138258	0.368224	0.28651	0.286202	0.357688	0.152031
LTR46	endothelial	0.633487	0.49594	0.250746	0	0.368183	1	0	0.674475	0	0	0	0	0	0.140974	0.0330273
MER9a1	endothelial	0.245965	1	0	0	0	0	0	0	0	0	0	0	0.154654	0.111584	0.0230943
LTR13	endothelial	1	0.57283	0.145061	0.0276642	0.181115	0.286405	0.499807	0.577975	0.320247	0.6199	0	0.189666	0.221982	0.445233	0.371734
LTR13_	endothelial	1	0	0	0	0.0577853	0.542699	0	0.355256	0.240361	0.300691	0	0.728827	0	0.163051	0.117893
MER54A	endothelial	0.799358	0.873965	0.205685	0	0.122919	0	1	0.234398	0.391007	0.110529	0	0.888145	0	0.257211	0.15755
MER68	endothelial	0.709323	1	0.613288	0.264041	0.209034	0.274397	0.705786	0.362505	0.67643	0.239251	0	0.0664434	0.0494165	0.411209	0.0822933
L3b	endothelial	0.975393	0.905799	0.531047	0.339437	0.409874	0.602104	1	0.620337	0.567123	0.0922856	0.250292	0.215431	0.124558	0.363176	0.103349
MER4B.int	endothelial	0.632214	0.748368	0.253408	0.120059	0.0204829	0.533377	0.476205	1	0.530429	0.1618	0	0.0803878	0	0.264696	0.055024
AluYe5	endothelial	0.809995	1	0.507575	0.222032	0.03522	0.615933	0.850643	0.738744	0.577766	0.129689	0	0.125865	0	0.459587	0.0797993
AluSq4	endothelial	0.922833	1	0.439684	0.0878847	0.0804697	0.763527	0.620402	0.670484	0.361928	0.0600678	0.186372	0.139446	0.0250101	0.409565	0.0502282
MER66C	endothelial	0.737802	0.195861	0.0612161	0	0	0.136787	0.695426	0.160809	0	0	1	0.977059	0	0.110038	0.148239
AluYk11	endothelial	0.607726	1	0.685767	0.0455972	0	0.319394	0.486651	0.423883	0.174975	0	0	0	0	0.314938	0.0357404
AluYh9	endothelial	0.584435	0	0	0	0	1	0	0	0	0	0	0	0.519428	0	0
MER74B	endothelial	0.611084	1	0.13759	0.199466	0.35382	0.505104	0.450662	0	0.175616	0.0545072	0	0.0728219	0.105149	0.238702	0.0540456
LTR2B	endothelial	0.369793	1	0.357413	0.291496	0.0255103	0.214842	0.102084	0.765987	0.110099	0.279391	0	0.149987	0.247565	0.309026	0.136599
Harlequin.int	endothelial	0.5245	0.780313	0.371349	0.249371	0.219566	0.500623	0.76093	0.486998	1	0.273869	0.348116	0.984599	0.418694	0.648161	0.284981
LTR75	endothelial	0.442668	0	0	0	0	0	0	0.247616	0.414338	0	0	1	0	0.228343	0.138121
AluYa8	endothelial	0.0766998	0.354943	0.0675446	0.143662	0	0.18429	0.21611	0	1	0.104737	0.725235	0.619081	0	0.1848	0.639954
LTR10A	endothelial	0.506758	1	0.225704	0.224017	0.232563	0.0742038	0	0.184336	0.235626	0	0	0	0	0.180359	0.112349
HERV9N.int	endothelial	0.440545	0.343858	0.340064	0	0.106598	0	1	0	0.200717	0.540392	0	0	0	0.332834	0.0808704
AluYh3a3	endothelial	0.722751	0.887828	0.33294	0	0	0.375552	1	0.681636	0.436481	0.180311	0	0.390876	0	0.282921	0.0881859
LTR7B	endothelial	0.886111	1	0.549375	0.0566806	0.104847	0.434312	0.217103	0.411994	0.31635	0.0625906	0	0.0527706	0.0534894	0.220264	0.0504083
AluYk3	endothelial	0.759012	1	0.450958	0.135302	0.0426499	0.713667	0.470173	0.652741	0.491343	0.0267959	0	0.0305525	0	0.471173	0.0315189
MER52A	endothelial	0.741588	1	0.197836	0.112404	0.274272	0.186495	0.17688	0.0884896	0.200534	0.139295	0.970448	0.346684	0.12932	0.197475	0.546811
MER83	endothelial	0.616586	1	0.303619	0	0.218216	0.658434	0	0.864006	0.814541	0.141342	0	0.257594	0	0.22744	0.137512
LTR26B	endothelial	0.160402	1	0.956538	0	0	0	0.881656	0	0	0	0	0.291157	0	0	0.0404865
LTR42	endothelial	0.198856	0.793088	0.456709	0.110316	0.0982437	0	0	0	1	0.0916255	0	0	0.168622	0.176505	0.0719295
MER4D	endothelial	0.896072	1	0.477951	0.636986	0.20499	0.620981	0.333913	0.683231	0.281685	0.187274	0	0.14892	0.147219	0.236691	0.0778788
L1M4a2	endothelial	1	0.851965	0.36106	0.1733	0.107135	0.441686	0.659789	0.275811	0.726401	0.18621	0.13933	0.200573	0.018326	0.304073	0.0927464
MER65B	endothelial	0	0	0	0	1	0	0	0	0	0	0	0	0	0.128375	0.337822
AluYi6	endothelial	1	0.50551	0.158467	0.169998	0	0.314737	0.641517	0.318743	0.392359	0.417466	0	0.177018	0	0.146129	0.0781222
AluYk2	endothelial	0.961821	1	0.412025	0.250499	0.0933808	0.781742	0.573478	0.338079	0.333913	0.0488853	0	0.0556966	0	0.288375	0.0338674
L1M4a1	endothelial	0.850935	0.993042	0.625218	0.395374	0.197903	0.628317	1	0.418447	0.681964	0.226156	0.361151	0.129665	0.0477327	0.406169	0.137393
X7A_LINE	endothelial	0.479102	0.656106	0.245866	0.193156	0.15546	0.477999	1	0.158702	0.0537722	0	0	0.052286	0	0.209344	0.05558
LTR16E1	endothelial	0.865747	1	0.128612	0.791024	0.375813	0.138314	0.410612	0.359954	0.249836	0	0.728244	0	0	0.430921	0.109381
ERV3.16A3_LTR	endothelial	1	0.488222	0.23636	0.112802	0.56041	0.199937	0	0	0.715254	0.198703	0	0.714461	0	0.410438	0.176809
MSTB	endothelial	0.930868	1	0.408228	0.473263	0.555733	0.582079	0.6724	0.386029	0.383929	0.298166	0.519368	0.83616	0.120636	0.390758	0.254386
LTR18B	endothelial	1	0	0.538581	0.11659	0.151741	0	0.622345	0	0	0	0	0	0	0.2461	0.122465
LTR81	endothelial	0	0	0.783122	0	0	0	0	0	0	1	0	0	0	0	0.0185476
MER74A	endothelial	1	0.951723	0.652156	0	0.106975	0.573572	0.533712	0.676827	0.619228	0.199885	0	0.188777	0.141712	0.489203	0.164819
LTR52	endothelial	0.256892	0.211366	0.0618727	0.0486117	0.104577	0.476799	1	0.283547	0.220048	0.0834759	0	0.19934	0	0.139927	0.0433909
MLT.int	endothelial	0.244335	0.229817	0.426742	0	0	0.450531	1	0	0.411095	0	0	0	0	0.168275	0.00990286
AmnSINE2	endothelial	0.800044	0	0.157663	0	0.508706	0.4768	0	0.518432	1	0.289994	0	0.156113	0.223264	0.122867	0.177963
MamRTE1	endothelial	0.946594	0.746043	0.616167	0.52225	0.380752	0.659208	1	0.670364	0.563715	0.266271	0.183388	0.214157	0.10351	0.45406	0.111341
LTR81C	endothelial	1	0	0.804081	0	0	0	0	0	0.665397	0	0	0.753311	0	0.269046	0.0920497
LTR41C	endothelial	0.977827	1	0.123901	0	0	0.557609	0	0.619859	0.177021	0.258777	0	0	0	0.374986	0.104313
MER34C_	endothelial	1	0.272297	0.130842	0	0.18834	0.406056	0	0	0	0.463443	0	0	0.253511	0.138072	0.0308777
MER34	endothelial	1	0.352581	0.347909	0.344098	0.0754007	0.585601	0.896912	0.997624	0.765739	0	0	0.12177	0	0.353221	0.0602454
LTR19A	endothelial	1	0	0.249603	0	0.0659549	0	0.71608	0	0	0	0	0	0	0.253246	0.159657
MER89	endothelial	1	0.474048	0.360515	0.0715214	0.160579	0.166322	0.641056	0	0.405913	0	0.722263	0.470635	0	0.223266	0.0672099
AmnSINE1	endothelial	0.966538	0.873926	0.49488	0.329077	0.632119	1	0.605753	0.826125	0.807291	0.0333057	0	0	0.0623897	0.556769	0.143541
LTR27B	endothelial	1	0.609324	0	0	0.589299	0	0	0	0.941813	0	0	0	0.700189	0.375275	0.231056
LTR106_Mam	endothelial	0.220673	0.700663	0	0.118969	0.175348	0	1	0.570489	0.810573	0	0	0	0	0.0903072	0.0373274
MLT1H.int	endothelial	0.546081	1	0.186814	0.493441	0.332808	0.29462	0.30933	0.134961	0	0.0518773	0	0.245547	0	0.150302	0.0658801
MLT2B4	endothelial	1	0.477113	0.236855	0.204753	0.295853	0.442866	0.289176	0.582309	0.282208	0.162866	0.241669	0.115752	0.0904449	0.330789	0.0872222
LTR40b	endothelial	0.990875	0.839714	0.785644	0.0631027	0.289426	0.115225	1	0.0983643	0.645533	0.151984	0.544169	0.121597	0.427396	0.138262	0.197508
AluYg6	endothelial	0.950871	1	0.513859	0.341112	0.0727183	0.527354	0.834533	0.809087	0.27119	0	0	0.0607712	0	0.340166	0.0320628
L1ME3Cz	endothelial	0.96257	1	0.578979	0.563084	0.412899	0.72978	0.978667	0.757292	0.746045	0.245554	0.200579	0.370001	0.123574	0.503089	0.212049
L1MA10	endothelial	0.783541	1	0.401794	0.366431	0.328554	0.536776	0.592097	0.559546	0.700233	0.256726	0.303082	0.150434	0.0644325	0.637318	0.102263
L1MC2	endothelial	0.982232	1	0.559509	0.40502	0.257394	0.638606	0.824969	0.623971	0.680353	0.237996	0.171446	0.22137	0.0820712	0.43036	0.116358
L1MEh	endothelial	0.66488	1	0.386899	0.372132	0.164998	0.456526	0.440582	0.505543	0.524309	0.119538	0.152438	0.169633	0.0576832	0.401701	0.0856457
LTR10B2	endothelial	0.724968	0.954755	1	0.360989	0.195521	0	0	0	0	0	0	0	0	0.18352	0.0041975
LTR21C	endothelial	0	0	0	0	0	0	0	0	0	0	0	0	0	0	1
LTR62	endothelial	0.53574	0.527049	0	0	0	0.369216	1	0.278957	0.292655	0	0	0.394637	0.200909	0.145731	0.0620426
MER34C2	endothelial	1	0.790021	0.630678	0.146873	0.171019	0.368571	0	0.821134	0.185782	0.296738	0.758731	0.360088	0.0776118	0.413131	0.0947685
LTR5B	endothelial	0.769789	0.237356	0.31205	0.306293	0.152575	0.336517	0.373409	0	0.686316	0	0.731736	1	0.173751	0.166318	0.143981
LTR45C	endothelial	0.376753	1	0.106158	0	0.133494	0.243629	0	0.266701	0.114816	0	0.586625	0.13656	0	0.0424017	0.0645412
LTR8A	endothelial	1	0.821663	0.0523104	0	0.161227	0.120344	0	0	0.300316	0.0837514	0.568343	0.240156	0.0679664	0.244802	0.13093
LTR38	endothelial	1	0.610789	0.242252	0	0.557815	0.913066	0.702508	0	0	0	0	0	0.211085	0.232155	0.115095
LTR38.int	endothelial	0.139511	1	0	0.863463	0	0	0	0	0	0	0	0	0	0.276439	0.0259289
HERVK13.int	endothelial	0	0.256677	0.370437	0	0	0.321632	0.659687	0	0	0	0	0.235887	0	1	0.51278
LTR3B_	endothelial	0.547067	0.236671	0.101149	0	0	0.349204	0	0.488154	0	0.462165	1	0.172404	0	0.0784581	0.0290942
L1MEi	endothelial	0.790997	0.87121	0.518539	0.356195	0.2256	0.708341	1	0.608489	0.648985	0.208128	0.131836	0.290041	0.118409	0.484256	0.122359
MER77	endothelial	0.446	1	0.314564	0.19065	0.195065	0.169558	0.322786	0.472199	0.108327	0.0776988	0	0.269678	0.0479317	0.150192	0.0944513
MER77B	endothelial	0.441816	1	0.130008	0.207389	0.0340113	0.206904	0.157221	0.10954	0.249168	0	0	0.132775	0.0253585	0.144909	0.0966362
LTR33C	endothelial	0.978324	0.300955	0.130338	0	0.207281	0.31127	0.676544	0	1	0	0	0.665942	0.475637	0.473564	0.448447
LTR85c	endothelial	0.266941	0.176785	0.134353	0.0775754	0.0446435	0.205315	1	0	0.141874	0.0692929	0	0	0	0.0497189	0.04716
LTR105_Mam	endothelial	0.597581	0.469366	0	0.675405	0	0.147744	0	0	1	0	0	0	0	0.0253115	0.113819
MLT2B2	endothelial	0.65695	0.824566	0.245019	0.0731838	0.314001	0.378457	0	1	0.458738	0.138947	0	0.931064	0.140591	0.710765	0.213627
MER92B	endothelial	0.768982	1	0.197972	0.0770782	0.085905	0.122662	0.216173	0.507107	0.503323	0.127788	0	0.209132	0	0.0893721	0.0744051
LTR10E	endothelial	0.447278	0.781112	0	1	0.0631397	0.330189	0	0.654211	0.262633	0.31645	0	0.418342	0	0.489305	0.185611
LTR16E2	endothelial	0.759679	1	0.337716	0.0772199	0.309872	0.046148	0.578784	0	0.213771	0.0903251	0	0.129371	0	0.21104	0.160415
L1ME5	endothelial	1	0.914893	0.312677	0.0438592	0.245578	0.426422	0.479277	0.369301	0.358403	0.283261	0.483556	0.875532	0.0541198	0.464643	0.259074
HAL1b	endothelial	0.635236	1	0.437683	0.289936	0.235374	0.482287	0.42818	0.438905	0.682312	0.134891	0.30008	0.246992	0.0404208	0.369115	0.110196
MER21B	endothelial	1	0.970541	0.339796	0.594665	0.151054	0.484516	0.249667	0.559812	0.514081	0.255446	0	0.086164	0.15656	0.370612	0.160618
LTR24C	endothelial	0.341796	1	0.42281	0.10195	0.277065	0.109346	0.252183	0.292147	0.271982	0	0	0.51948	0	0.105226	0.0219519
MSTC	endothelial	0.431979	1	0.252221	0.0984749	0.15991	0.258922	0.687913	0.761121	0.439445	0.185894	0	0.139066	0.0774711	0.249063	0.0975224
MLT1J1	endothelial	0.600604	1	0.456149	0.266602	0.353819	0.541887	0.0977992	0.110827	0.480068	0.222203	0	0.12217	0.0697255	0.380218	0.091168
MER21A	endothelial	1	0.382366	0.374424	0.227763	0.124948	0.382367	0.666649	0.259868	0.231201	0.245009	0.346445	0.322098	0.106357	0.460988	0.202421
MLT2A2	endothelial	0.811276	1	0.0988223	0.160446	0.218376	0.432416	0.652667	0.361967	0.491366	0.297749	0	0.247434	0.0536423	0.295232	0.123636
MER48	endothelial	0.993346	1	0.115201	0.100876	0	0.228741	0.587707	0.217969	0.614699	0.407244	0	0.12712	0	0.322377	0.154302
LTR7A	endothelial	0	0	0	0	0	0	0	0	0	0	0	0	0	1	0
LTR53B	endothelial	0	1	0	0	0.545559	0	0	0	0	0	0	0	0	0.0884191	0.00729836
MER61B	endothelial	1	0.501924	0.112209	0.184563	0.167407	0.180767	0.389173	0	0	0.0847076	0	0	0	0.180068	0.0866596
LOR1a	endothelial	0.613481	0.727286	0.210182	0.212175	0.170569	0.841721	0	1	0.310547	0.205048	0	0.196746	0.262559	0.226968	0.0976105
LTR33A_	endothelial	0.832903	0.992282	0.930802	0.154261	0.194321	0.383829	0.591613	1	0.404692	0.255462	0	0.196746	0	0.352006	0.109923
MER57B1	endothelial	1	0.593338	0.052139	0.0631456	0.135254	0.174	0	0.636358	0.549736	0.149631	0.498031	0	0	0.126984	0.0537424
AluYh7	endothelial	0	0	1	0.126345	0	0.900314	0.571558	0	0.522572	0	0	0	0	0.0269673	0
LTR16A2	endothelial	1	0.336663	0.462105	0.54429	0	0.269788	0.65629	0.146185	0.796223	0.123732	0	0.803222	0.147219	0.380295	0.160699
LTR53	endothelial	0.322211	1	0.376785	0.35118	0.481618	0.290987	0	0.665076	0	0.195798	0	0.281316	0	0.223994	0.0609198
MER90a	endothelial	0.916874	0.878603	0.0495395	0.377284	0.290604	0.671514	1	0.332075	0.309392	0.272389	0	0.36535	0.203924	0.619513	0.151386
LTR1A2	endothelial	0.508286	0.650478	0.176904	0.122086	0.544507	0.24811	0.421217	0	1	0.240465	0	0.30556	0	0.158481	0.186649
MER11A	endothelial	0.693105	1	0.210974	0.154374	0.341963	0.345594	0.427814	0.346171	0.259317	0.0591726	0	0.078012	0.148558	0.14466	0.0638678
LTR81AB	endothelial	0.236872	0.602836	0	0	0.659769	1	0	0	0	0	0	0	0	0	0.0363215
MER61D	endothelial	0.474073	1	0	0	0.274442	0	0	0	0.922092	0	0	0	0	0.165888	0.0188172
MER61A	endothelial	0.554168	1	0.242792	0.301064	0.108005	0.693355	0.577517	0	0.377104	0	0	0.254452	0	0.370831	0.130082
X7B_LINE	endothelial	0.453332	1	0.233313	0.218995	0.118694	0.219651	0.161008	0.114496	0.461958	0.0527137	0	0.112949	0.113897	0.150447	0.0689178
L1P3	endothelial	0.749374	1	0.417232	0.115962	0.185248	0.492491	0.408181	0.379649	0.49082	0.164375	0.196835	0.180456	0.0748289	0.414262	0.127464
CR1_Mam	endothelial	0.72961	1	0.498946	0.247455	0.152341	0.728247	0.713438	0.619447	0.406546	0.166997	0	0.110263	0.0626826	0.318935	0.0921429
LTR101_Mam	endothelial	1	0.878642	0.55032	0.422791	0.0723527	0.225756	0.973693	0.517977	0.299031	0.137266	0	0	0.245688	0.77545	0.147834
X6B_LINE	endothelial	1	0.733862	0.234367	0	0.25155	0.590036	0.28237	0.380422	0.462525	0.391456	0	0	0.175413	0.419028	0.0965053
MLT1G	endothelial	0.801724	1	0.250504	0.437246	0.183831	0.127084	0.377731	0.582373	0.112255	0.158313	0	0.515433	0.174443	0.233628	0.169204
MER110	endothelial	0.107619	0	0	0	0.313058	0.359985	0	0	1	0	0	0	0.285519	0.30239	0.0437902
LTR66	endothelial	0.389916	0.291508	0.285848	1	0	0.357643	0	0.856205	0	0	0	0.188587	0	0.109677	0.0493899
HERVL66.int	endothelial	0	0	0	0	0	1	0	0	0	0	0	0	0.352724	0.0298256	0.0117268
X6A_LINE	endothelial	0.420629	0.758573	0.0702038	0.125313	0	0.395412	1	0.140922	0.796595	0	0	0.22156	0.0693515	0.148475	0.0301756
MER54B	endothelial	1	0.451225	0.232815	0	0	0.298866	0.835071	0	0.763269	0	0	0	0	0.231776	0.0250133
MER70A	endothelial	1	0	0.13796	0.257933	0.374745	0	0.648742	0	0.42304	0	0	0	0	0.307959	0.0974252
MLT1E	endothelial	0.382815	0.358625	0.239859	0.428031	0.18647	0	0	0.0994405	1	0	0	0.36861	0.0435032	0.256024	0.0345417
MamGypsy2.I	endothelial	0.853165	1	0.289087	0.455254	0.119706	0.926321	0.605394	0.276789	0.103382	0.0622171	0	0.100411	0.162592	0.301572	0.0666425
MamGypsy2.LTR	endothelial	0.357736	0.690158	0.556633	0.359565	0	0.223093	1	0.697833	0.424725	0	0	0	0	0.0927053	0.0248383
LTR90B	endothelial	1	0.673385	0.807061	0	0.458803	0.322791	0	0	0	0	0	0	0	0.331184	0.088299
MamSINE1	endothelial	0.80235	1	0.469496	0.371236	0.347323	0.87429	0.92586	0.528351	0.781777	0.234328	0	0.166877	0.0449737	0.440225	0.139888
LTR16D	endothelial	0.679525	0.686603	0.098195	0.299653	0.229019	0.436795	0	0.297611	0.562002	0.462937	1	0	0.154068	0.223824	0.0916978
LTR24	endothelial	0.64476	0	0	0.074422	0.167147	0.168756	0.297986	0.82938	0.285588	0	1	0	0.23959	0.234561	0.0224528
LTR24B	endothelial	0.567561	1	0.232219	0	0.101829	0.374328	0.200987	0	0.308761	0.0696892	0	0	0.0579551	0.254204	0.0895888
MER57A1	endothelial	0.59877	0.696915	0.373755	0.280877	0.19182	0.719177	0.544099	1	0.164171	0.234488	0	0.0938002	0	0.29597	0.0773707
MLT1J.int	endothelial	0.389772	1	0.110135	0	0.197315	0.130857	0.225875	0.204361	0	0.688616	0	0	0	0.124539	0.06729
MER34.int	endothelial	0.307784	0	0	0.0520785	0.129626	0.196765	0	0.371106	1	0.125908	0	0.112239	0	0.12032	0.0202705
MER70B	endothelial	0.418527	0	0	0	0	0	0	0	1	0	0	0	0	0.12503	0.0483617
UCON49	endothelial	0.302234	1	0	0	0	0	0	0	0	0	0	0	0	0.333904	0.0486318
MamGypLTR1a	endothelial	0.473387	0.448394	0.829855	0	0	1	0.370952	0.272289	0.276557	0	0	0	0	0.146561	0.0421736
L1MEj	endothelial	0.803304	1	0.491784	0.186851	0.122082	0.623914	0.705191	0.692552	0.445782	0.232325	0.148798	0.136448	0.145018	0.445698	0.0921937
LTR23	endothelial	1	0.750055	0.24359	0.0716111	0.0479665	0.209747	0	0	0.129725	0	0	0	0	0.147383	0.0426701
ERV24_Prim.int	endothelial	0.168349	0.233806	0	0	0	0.193552	0.449715	0	1	0.432907	0	0.224796	0.239461	0.265568	0
LTR23.int	endothelial	1	0	0.194557	0	0.174729	0	0	0	0	0	0	0	0	0	0.0663712
MER34B	endothelial	0.382988	1	0.54121	0.136597	0.114611	0.137697	0.233706	0.23112	0.656069	0	0	0	0	0.165716	0.0472286
LTR54	endothelial	1	0.915929	0.413166	0.155297	0.236	0.219563	0.433372	0.319404	0.589447	0	0.41486	0.14709	0.0645605	0.18711	0.0720745
MER34C	endothelial	0.597817	0.36268	0	0.511294	0	0.765506	0	0	1	0	0	0.408173	0	0	0.0101611
LTR16A	endothelial	0.848856	1	0.315468	0.478925	0.249347	0.496039	0.171386	0.411555	0.512061	0.251243	0	0.0924373	0	0.434435	0.178003
MER34A1	endothelial	0.507177	1	0.678647	0	0.0536829	0.53357	0.334625	0.253459	0.271537	0.335798	0	0.156492	0	0.180041	0.040396
LTR16B2	endothelial	1	0.548485	0.197201	0.301849	0.0945209	0.392016	0	0.180952	0.423287	0	0	0.263691	0.248757	0.307855	0.134176
LTR33A	endothelial	1	0.849821	0.527112	0	0.181594	0.316312	0.326443	0.663246	0.312074	0.653411	0	0.486584	0.0893217	0.353869	0.129396
MER41A	endothelial	0.94729	0.494754	0.341632	0.262873	0.0325764	1	0.27462	0.988397	0.768957	0.164105	0	0.153276	0.100631	0.442249	0.109905
MER4E	endothelial	1	0.776333	0.419601	0.179402	0.186005	0.473905	0.83793	0.555069	0.601682	0.062449	0	0.179154	0.114237	0.279772	0.0807724
MLT1C.int	endothelial	0.939024	1	0.790453	0	0.20344	0.737971	0	0	0	0	0	0	0	0.475148	0.0792909
LTR16D2	endothelial	0.746334	0	0.383471	0	0	1	0	0	0	0	0	0	0	0.216835	0.111766
LTR16B1	endothelial	0.701387	1	0.437174	0	0.138991	0.313301	0	0	0.387229	0	0	0.855118	0.123954	0.823439	0.160552
MLT1G1.int	endothelial	0.942215	1	0	0	0.249516	0	0	0	0	0	0	0.562008	0.447065	0.462515	0.106754
LTR1C	endothelial	1	0	0.406399	0	0	0	0	0	0	0	0	0	0	0	0.186508
LTR41B	endothelial	0.551179	0.731455	0.160213	0	0.386827	0.602279	0.257224	0.29085	1	0.196265	0	0.286166	0	0.33938	0.0948043
MLT1B.int	endothelial	0.596517	0.356307	0.0522953	0	0.0255274	0.197966	1	0	0	0	0	0.0910787	0	0.120623	0.0972878
AluSq10	endothelial	0.831064	1	0.441961	0.381058	0.0533578	0.446481	0.475525	0.347997	0.294795	0.110036	0	0.0407715	0.0486475	0.296133	0.0459279
LTR19B	endothelial	0	0.843827	0.186962	0	0	0	1	0.733208	0.652093	0.721007	0	0	0	0.139673	0.103042
LTR85b	endothelial	0.467734	1	0	0.131204	0.812001	0	0	0.877026	0	0	0	0.378867	0.272234	0.298226	0.233868
LTR71B	endothelial	0.357936	1	0	0	0	0	0.347965	0.197036	0	0	0	0	0	0.0740473	0.0489238
LTR16D1	endothelial	0	0	0	0	0.408768	0	0	0	0	0	0	0	1	0	0.0375041
MER51E	endothelial	1	0.388387	0.554711	0.473315	0	0.269008	0	0	0.32934	0.317815	0	0	0	0.207634	0.0898638
LTR86A1	endothelial	0.401291	0.405417	1	0.211574	0.154076	0.664279	0	0.695897	0.460621	0	0	0	0	0.251547	0.0179225
LTR75_1	endothelial	0.515699	0	0.37586	0.477455	0	0.505825	0	0.387596	0	0.315978	0	0.528306	1	0.305758	0.212683
MER72	endothelial	0.45036	1	0.408288	0.341448	0.472848	0.37279	0	0.156323	0.230999	0.179522	0	0.424658	0.277353	0.351334	0.138124
L2.3_Crp	endothelial	0.716463	1	0.458163	0.235132	0.243637	0.282764	0.512554	0.229607	0.51057	0.048349	0.167694	0.214107	0	0.161349	0.0888011
MLT1D.int	endothelial	1	0.698311	0.355361	0.3091	0.190936	0.25358	0	0.21051	0.345003	0	0	0.233651	0.217147	0.144903	0.0844593
MER52D	endothelial	1	0.770111	0.213052	0.328395	0.305021	0.410156	0.143415	0.160492	0.0899423	0.298036	0.488931	0.448968	0.225138	0.206084	0.215981
LTR12E	endothelial	0.0856406	0.127547	0.0740637	0.326026	1	0.049873	0	0	0.294406	0.241293	0.662236	0.913662	0.210385	0.175263	0.18122
LTR21B	endothelial	0	0	0	0	0	0	0	0	0	1	0	0	0	0	0.0801149
HERVFH21.int	endothelial	0.185643	0.355303	0.0473957	0	0	0	0	0.113825	0.214107	0	1	0.375587	0.155299	0.0642917	0.0583803
AluYk4	endothelial	0.789016	1	0.267123	0.259674	0.0848187	0.550978	0.493902	0.42085	0.524508	0.0558865	0.1429	0.196369	0	0.37755	0.0864902
MER101	endothelial	0.179498	0	0	0	0	0	0	0	0.1268	0.309385	1	0.32262	0	0.11289	0.0337743
LTR36	endothelial	1	0.958603	0.486717	0.732508	0.0652881	0.871844	0.828775	0.520465	0.402351	0	0	0.213161	0.165781	0.323391	0.0723059
MLT1M	endothelial	0.895024	0.673512	0.525458	0.403812	0.282533	0.902203	0.669916	0.411195	0.492745	0.195422	0	1	0.105207	0.49909	0.167955
LTR71A	endothelial	1	0.634894	0	0	0.484232	0	0	0	0	0	0	0	0	0.764671	0.274082
Penelope1_Vert	endothelial	0.279672	0.535071	0.579626	0.308922	0.275367	0.477608	0.186319	0.284801	1	0.224191	0	0	0	0.255925	0.0517825
X9_LINE	endothelial	0.813387	0.603291	0	0.633563	0.269109	0.755476	0	0	1	0	0	0	0	0.265565	0.103214
CR1.3_Croc	endothelial	0.640294	0.551557	0.166992	0.381464	0.247308	0.393299	0	0.595056	1	0.0314141	0	0.131403	0	0.170002	0.0665508
LTR86A2	endothelial	0.506745	0.517771	1	0	0	0.132445	0.447446	0.436379	0.621137	0.224194	0	0.398912	0	0.380187	0.111277
X5B_LINE	endothelial	0.900517	0	0	0	0	0	0	0	1	0.519704	0	0	0	0.1189	0.0426286
Mam_R4	endothelial	1	0.767127	0.352319	0	0.233933	0.456339	0.437218	0.27329	0.963979	0.132193	0	0	0	0.196535	0.0366289
MLT2C2	endothelial	1	0.859508	0.567566	0.132957	0	0.257702	0.732784	0.399296	0.474076	0.123952	0.671192	0	0	0.74018	0.0671124
CR1.16_AMi	endothelial	0.905705	0.667735	0.636925	0	0.516255	1	0	0	0	0	0	0	0.217924	0.261876	0.0216032
LTR1F	endothelial	0	0	0	1	0	0	0	0	0	0	0	0	0	0.287917	0.200911
MER84	endothelial	0	0	1	0.243164	0	0	0	0	0	0	0	0	0	0.221622	0.0665526
MER84.int	endothelial	0.452308	0	0	0	0	1	0	0	0	0	0	0	0	0	0
LTR29	endothelial	0.555443	0.885874	0.321979	0.141816	0.239764	1	0.30921	0.279759	0	0.109981	0	0.167272	0	0.107994	0.0577939
L1M	endothelial	0.226803	0.869869	0.158222	0.111176	0.0467149	1	0.381734	0	0	0	0	0	0.102195	0.282096	0.0736349
MER51B	endothelial	0.329634	0.400089	0	0	0.0675929	0	1	0	0.292833	0	0	0.662667	0	0.119176	0.0585557
LTR47A	endothelial	0.372579	0.358412	0	0.0892615	0	0.404216	0.356216	0.132725	0.0772431	0.0763311	0.419898	1	0.0786731	0.132669	0.175653
MER9a3	endothelial	1	0.812794	0.26064	0.553623	0.212141	0.272282	0	0	0.166496	0.300056	0	0	0.230628	0.128789	0.166532
LTR82A	endothelial	0.717204	0.666333	0.243872	0.101848	0.402844	0.28399	0	1	0.428184	0.105482	0	0	0	0.113762	0.0801848
LTR21A	endothelial	0.172248	0	1	0	0	0.589202	0	0	0	0	0	0	0	0.102069	0.0202514
LTR77	endothelial	0	0	0.214455	0	0	0	0	0	0	0	0	1	0	0.0861215	0.025195
LTR61	endothelial	0.887678	1	0.146722	0.180338	0.0235493	0.308505	0.252831	0.111613	0.282492	0	0	0	0	0.121525	0.0223492
MER4C	endothelial	0.287569	1	0.191626	0.387493	0.170391	0.445281	0	0	0.249476	0.230475	0	0.147654	0.0793318	0.152516	0.0831469
MER41E	endothelial	1	0.806132	0.350537	0	0	0	0	0.422761	0.476779	0	0	0	0.379294	0.0607123	0.146259
AluYe6	endothelial	1	0.993311	0.376237	0.370768	0	0.691624	0.382335	0	0.498713	0	0	0	0	0.637262	0.0669778
HERVFH19.int	endothelial	0.746089	0.885492	0.287111	0.43787	0	0.126424	1	0.497995	0.251209	0.425846	0	0	0	0.237299	0.0461074
MER110A	endothelial	0.28791	0.36956	0.327809	0	0.122161	0.442484	0	0.2621	0	0.0618129	1	0	0.117012	0.0576398	0.0389635
AluYd8	endothelial	0.326838	1	0.42702	0	0.0797193	0.555929	0.649213	0.359179	0.176669	0	0.373563	0.073545	0	0.233266	0.00782487
MER11D	endothelial	0.362096	0.507698	0	0.554571	0.295031	0	1	0	0	0.250433	0	0.57204	0	0	0.0296521
MamGypLTR3a	endothelial	0.056393	0.497897	0.275524	0.415116	0.354514	0.922923	0	0	0	0.648979	0	0.202673	0	1	0.0545699
LTR26E	endothelial	1	0.387118	0.0721075	0	0	0	0	0.436719	0	0	0	0	0	0	0.0267905
X7C_LINE	endothelial	0.296715	0.884774	0.466536	0.285537	0.267679	0.645384	0.505235	1	0.0888029	0	0	0	0	0.202859	0.0333051
LTR9	endothelial	1	0.956892	0.115448	0.589123	0	0.188127	0	0.472304	0.425331	0.450862	0	0.474975	0.202735	0.148995	0.0873932
LTR60B	endothelial	0.253008	0	0	0	0.128633	0	0	0	1	0	0	0	0	0.0841134	0.0220615
LTR2	endothelial	0.375839	1	0.104123	0.133318	0.159442	0.0757712	0.275391	0.449574	0.267741	0.088421	0.329983	0.0912543	0.13576	0.158614	0.0647994
MER57C1	endothelial	1	0	0.362528	0.870112	0	0.833902	0	0	0	0	0	0	0	0.869929	0.0905791
AluYi6_4d	endothelial	0.306366	0.345594	0.184334	0	0	1	0	0	0.283855	0	0	0	0	0.299185	0.00561444
LTR83	endothelial	0.402053	0.913012	0	0.169888	0.0770715	0	0.375603	0	1	0	0	0	0.144339	0.122889	0.127534
LTR1D1	endothelial	0.536326	0.178307	0.0774512	0.170397	0.132453	0.240299	0	0	1	0.311858	0	0.133851	0	0.178088	0.0311577
LTR51	endothelial	0.253455	0.81179	0.221054	0	0.55461	0	0	1	0	0	0	0.243924	0	0.480166	0.393572
X7D_LINE	endothelial	1	0	0	0	0	0	0	0	0	0	0	0	0	0	0
LTR84a	endothelial	0.637773	0.15066	0.686785	0.734469	0	0.565733	0	0.645886	0.550374	0.336075	0	0	0	1	0.0421124
L2.1_AMi	endothelial	1	0.657507	0	0.269947	0.248781	0.447848	0.211723	0	0.794623	0	0	0	0.089312	0.37653	0.095874
LTR84b	endothelial	1	0.838533	0.0927431	0	0.319881	0.607752	0.330735	0.220107	0	0.365617	0	0.365262	0	0.330703	0.0880735
LTR26C	endothelial	0.109305	0.20614	0	0.388027	0.13584	0.977133	0	0.387709	1	0	0	0	0	0.499459	0.0510018
LTR16	endothelial	0.730347	0.672212	0.630586	0.261165	0.107025	0.568186	0	0	1	0.407912	0	0.203203	0.092909	0.211831	0.211416
LTR43B	endothelial	1	0	0.278632	0.705857	0	0.167172	0	0	0	0	0	0	0	0.0889038	0.0139491
HERVIP10FH.int	endothelial	0.596314	1	0.299808	0.0528579	0.121549	0.739962	0.735428	0.179796	0.958971	0.0620257	0.383697	0.262572	0.0630557	0.281015	0.060495
LTR103_Mam	endothelial	0.628867	0.233941	0.144658	0	0.0810317	0.777181	0	0	1	0	0	0	0	0.91828	0.12855
LTR47B2	endothelial	0.11294	1	0	0	0	0	0	0	0.425126	0	0	0	0	0.101762	0.0504686
ERV24B_Prim.int	endothelial	0.0558768	1	0.105676	0.288025	0.1501	0.26867	0	0.258768	0.109207	0.0284075	0	0.0972326	0.0612959	0.33159	0.130134
MER34B.int	endothelial	0.265145	0.101217	0.16906	0.450257	0.358594	0.245716	0.774958	1	0.796135	0.229228	0	0	0.136368	0.58757	0.398961
LTR75B	endothelial	0	0	0.243129	0	0	0	1	0	0	0	0	0	0	0.0808235	0.0906352
LTR1C1	endothelial	0	0	0	0	0	0	0	0	1	0	0	0	0	0.286748	0.282367
MLT2E	endothelial	0	0	0	0.220914	0.310757	0	0	0	1	0	0	0.650637	0	0.187148	0.0810959
LTR65	endothelial	0.37703	1	0.168241	0.145943	0.254577	0	0	0	0	0	0	0.182025	0.113546	0.107337	0.0498484
LTR22B1	endothelial	0.991043	1	0	0	0	0.8662	0	0	0	0.632551	0	0	0	0.282705	0.00764028
MER68.int	endothelial	1	0.881084	0.597814	0	0	0.129236	0.797687	0	0.199642	0	0	0	0	0.256137	0.0560768
LTR102_Mam	endothelial	0.348401	0	0	0.326272	0.0631677	0.133419	1	0	0.640067	0	0	0	0.162879	0.108632	0.0280212
LTR10F	endothelial	0.575402	1	0.0664818	0.142918	0	0.0979609	0.224633	0	0.369422	0.0509145	0	0	0	0.0775948	0.0154491
PRIMA4.int	endothelial	0.371856	0.579328	0.710717	0.197095	0.0523364	0.451721	1	0	0.528145	0.101464	0	0	0.0643411	0.249784	0.0327615
MER41G	endothelial	0	1	0	0	0	0	0	0	0	0.310374	0	0	0	0.142872	0
L1HS	endothelial	0.535209	0.602201	0.370992	0.318304	0.133537	0.681601	1	0.533994	0.341546	0.20994	0.513784	0.670879	0.0194882	0.47647	0.420862
LTR44	endothelial	0.428776	1	0.126646	0	0	0.290357	0	0.368538	0	0	0	0	0	0.709247	0.115874
LTR45B	endothelial	1	0.82983	0.166787	0.315442	0.0894012	0	0.645427	0.605647	0	0	0	0	0.267305	0.52124	0.128799
MER57A.int	endothelial	0.95959	1	0.829877	0.623834	0.11719	0.942035	0.83989	0.793474	0.773642	0.490813	0	0.25435	0.072453	0.482613	0.20431
MER101.int	endothelial	1	0.973817	0.415869	0.477821	0.389077	0.387643	0.94199	0.859824	0.777264	0.239653	0	0.215913	0.125059	0.334765	0.0985658
L1M3f	endothelial	0.71184	0.990922	0.571044	0.174576	0.0586538	0.415295	0.573737	0.712753	1	0.0840308	0	0.106654	0	0.477975	0.0960555
LTR57	endothelial	0	0.98744	0	0	0	0.406571	0	1	0	0.451892	0	0	0	0.447304	0.0721485
HERV3.int	endothelial	0.923068	1	0.821988	0.41736	0.0974961	0.661209	0.316798	0.941353	0.734759	0.335704	0	0.233025	0.128646	0.391254	0.140208
HERVE.int	endothelial	0.235898	0	0	0.1592	0.360348	0.13722	0	0	1	0.602677	0	0	0.205993	0.0813276	0.199855
LTR1C3	endothelial	0	0	0	0	0	0	0	0	1	0	0	0	0	0	0.0215278
LTR7Y	endothelial	0.164526	0	0.488388	0	0	0	0	1	0	0	0	0	0	0.121407	0.0373896
HERV9NC.int	endothelial	0.89995	0.872956	0	0	0.109888	0.432918	0	0.317056	1	0.153364	0	0	0.332081	0.327985	0.106788
LTR12D	endothelial	0.136135	1	0.119885	0	0	0	0	0	0	0.849925	0	0.222475	0.257742	0.158475	0.110396
LOR1b	endothelial	0.82692	0.574126	0.841694	0.318109	0.124185	1	0.423786	0.58879	0.351333	0	0.507795	0.17246	0	0.451145	0.0876422
LTR88a	endothelial	0.591186	0	0.133227	0.343518	0	0.730356	0	1	0.547615	0	0	0	0	0.16603	0.0777961
LTR10B	endothelial	0.590123	1	0.101563	0	0.136938	0.347821	0.309686	0.370343	0	0	0	0	0	0	0.0220061
LTR14A	endothelial	0.515258	1	0	0	0	0	0	0	0	0	0	0	0	0.355898	0.139399
LTR22A	endothelial	0.257183	0.517988	0.374788	0.187195	0.277396	0	0	0	0.894	1	0	0	0	0	0.0583542
MST.int	endothelial	0.789728	0.783484	0.240955	0.0604824	0	0.898137	0	1	0.317626	0	0	0	0	0.324843	0.00975382
LTR80A	endothelial	0.173841	0	0.359808	0	0.0915894	0	0	0	1	0	0	0.548348	0	0.235956	0.0133486
LTR86B1	endothelial	0.448466	1	0	0	0.285505	0	0	0.236401	0	0	0	0	0	0.181729	0.0504065
MamGypLTR1c	endothelial	0.408085	0.454512	0	0	0.324519	0.251059	0	0	0.379997	0.174432	1	0.597408	0	0.317397	0.12117
LTR82B	endothelial	0.95973	0.418484	1	0.117443	0.391745	0	0.295689	0.850115	0.285309	0.0643597	0	0.257244	0.255819	0.299029	0.0685157
LTR88b	endothelial	0.580964	0.865686	0.366065	0	0.0625634	0.382965	0	0.522875	1	0.576462	0	0	0	0.195233	0.0652412
MLT1F.int	endothelial	0.464364	0.683129	0.171429	0	0.296687	0.188473	0	1	0	0	0	0	0	0.452102	0.0615015
LTR55	endothelial	0.672965	0	1	0	0.0451568	0	0	0.62056	0	0	0	0.4611	0	0.0172994	0.0303812
MamGypLTR2c	endothelial	1	0.604046	0	0	0.225773	0.154889	0	0	0	0.544387	0	0	0	0	0.169907
MLT1I.int	endothelial	1	0.888559	0	0	0.111738	0.339434	0	0	0.400744	0.0735306	0	0	0	0.295923	0.066483
LTR9A1	endothelial	0.570289	0.204394	0.212803	0	0	0.389138	1	0.213812	0.225306	0.113934	0	0.293788	0.127763	0.343578	0.0766132
HERVL74.int	endothelial	0.735958	0.805924	0.896878	0.392556	0.0931427	0.183521	1	0.523049	0.387063	0	0	0	0.21257	0.340658	0.133958
X1_LINE	endothelial	0.890918	0.83809	0	0.15766	0.258597	0.395169	1	0.510715	0.652093	0	0	0	0	0.331247	0
PRIMA4_LTR	endothelial	0.0499499	0.675807	0.121054	0.363682	0	0	0	0.19279	1	0.126621	0	0	0	0.0837664	0.0556894
MER57E2	endothelial	0.704694	1	0.162342	0.257253	0	0.557178	0	0	0.643483	0	0	0	0	0.0808542	0.0157025
MamGypLTR1d	endothelial	0.405343	0	0	0	0.136046	1	0	0	0	0	0	0	0	0.305492	0.0188315
LTR81A	endothelial	0.50059	1	0.177801	0.111916	0.0160983	0.384083	0.183396	0	0.746377	0	0	0	0.0881747	0.114582	0.0338507
MER57F	endothelial	0.451163	0.445328	0.145189	0	0.072914	0.184798	0.289485	0.169029	1	0.0872423	0	0.220601	0.228445	0.212709	0.0694042
MLT1J1.int	endothelial	0.185265	0.424354	0.214472	0.665745	0.390971	0.293443	0.948882	1	0	0.276887	0	0	0.343728	0.236219	0.0739106
MER90	endothelial	0.350841	0.630216	0.085006	0.182673	0.115517	0.429208	1	0	0.274309	0	0	0	0	0.0675925	0.021921
LTR4	endothelial	0.0967744	0.69137	0.134268	0.0545487	0.112279	0	0.749696	0.221981	0.413344	0	0.802563	1	0.150418	0.305725	0.159957
MER87	endothelial	0.285591	0	0.347974	0	0	0.484578	0	0	0	1	0	0	0	0	0.179079
MER51D	endothelial	0.78769	0	0.2211	0.588502	0.0652341	0.455676	1	0.225466	0.824506	0.445375	0	0.175878	0	0.216942	0.0232148
PRIMA41.int	endothelial	0.261844	0.447223	0.190127	0.162747	0.160922	0.263763	0.300727	0.41793	1	0.185725	0.96276	0.638318	0.116501	0.449335	0.245045
LTR39.int	endothelial	0	0.914243	0.396722	0	0	1	0	0	0	0	0	0	0	0.172272	0
MER57B2	endothelial	1	0.858597	0.354115	0.45864	0.290121	0.181733	0.772125	0.260006	0.65486	0	0	0	0.410424	0.26422	0.0817754
LTR54B	endothelial	0.69448	0.916716	0.224528	0.154296	0.247351	0.376034	0.271474	0.0918595	1	0.159088	0	0	0.0401866	0.187554	0.0428287
LTR76	endothelial	0.248075	0.98144	0.25308	0.228174	0.0991208	0.20841	0	1	0.214004	0.205938	0	0	0	0.14206	0.108587
MamGypLTR2b	endothelial	0.233816	1	0	0	0	0.0921369	0.262526	0.236159	0	0.110181	0.840463	0.4625	0	0.14239	0.028334
MER50C	endothelial	0	0	0	0	0	0	0.526281	0	1	0	0	0.356615	0	0.0559603	0.0230042
PABL_B	endothelial	0.409928	1	0.32756	0.0916933	0.556408	0.134417	0.349894	0.198128	0	0	0	0.130346	0.14759	0.378283	0.0690557
LTR15	endothelial	0.708783	1	0.130524	0.0951448	0.187812	0	0	0	0.149922	0	0	0	0.183784	0.0834819	0.0583112
LTR38B	endothelial	0.994288	0.806357	0.52923	0	0.344901	0.276474	0	0	1	0	0	0	0	0.122294	0.130719
LTR1F1	endothelial	0.300256	0.548043	0	0	0.308891	0	1	0	0	0	0	0	0	0.207689	0.0666821
X8_LINE	endothelial	1	0	0	0.685101	0.439302	0.51417	0	0	0.929864	0	0	0	0	0.373556	0.0404504
L2.1_Crp	endothelial	0.280964	0	0.434737	0	0	1	0	0	0	0	0	0	0	0.0997824	0.0437221
MER4D0	endothelial	0.314959	0.705662	0	0	0.257203	0	0	0.661554	0.862895	0	0	1	0.3627	0.360646	0.231669
HUERS.P3.int	endothelial	0.453533	1	0.198091	0.213625	0.0874905	0.294385	0	0.22042	0.5912	0.289066	0	0	0.0551484	0.274587	0.0530534
HERV35I.int	endothelial	0.992577	0.559051	0.203469	0.11784	0.154639	0.505555	0	0.697511	0.518024	0	0	0	0.282509	1	0.220511
LTR37.int	endothelial	0.761808	1	0.202588	0.115075	0.222964	0.312969	0.319005	0.344826	0.297435	0.208961	0	0.0679655	0	0.269639	0.0674352
LTR28B	endothelial	0.509773	1	0.397487	0	0.230093	0.486231	0	0.550196	0.376743	0.129319	0	0	0	0.280061	0.179592
LTR14	endothelial	0	0.807885	0	0	0.529733	0	1	0	0	0	0	0	0.234743	0	0.00387707
HERVK14C.int	endothelial	0	0	0	0	0	0	0	0	0	0	0	0	0	1	0.196652
MER66A	endothelial	0.256281	0.228349	0.157806	0	0.0874596	0.229745	0	0	0	0.0820044	0.998167	1	0.319471	0.0497578	0.126669
MamGyp.int	endothelial	1	0	0	0	0	0	0	0	0	0	0	0	0	0.755528	0.631222
MLT1A1.int	endothelial	0.572043	1	0.579545	0.637126	0	0.211112	0.591305	0.148043	0.181368	0.0409127	0	0	0	0.284656	0.0398874
LTR46.int	endothelial	0.83992	0	0	0.243384	0.609489	1	0	0.811004	0	0	0	0	0.287791	0.213099	0.126469
L1M2a	endothelial	0.735041	0.658407	1	0.533243	0.100096	0.650563	0.453219	0.804567	0.634224	0.165236	0	0.0305546	0.219358	0.596917	0.101092
L1P4e	endothelial	1	0.402216	0	0	0	0.52515	0	0	0	0.364734	0	0	0	0.368056	0.030857
LTR26D	endothelial	0.355301	0.720865	0	0	0	0.438062	0.615473	0	1	0	0	0	0	0.197928	0.0459118
LTR107_Mam	endothelial	0.721983	0.596955	0	0	1	0.184796	0	0	0.326123	0	0	0	0	0.909563	0.0414806
MLT1A.int	endothelial	0.766247	0.722588	0.292086	0	0.177624	0	0	1	0.284114	0.219558	0	0.262758	0.466871	0.186679	0.0937069
LTR7C	endothelial	0.73778	1	0.150644	0.121224	0	0.292675	0	0.532974	0.257056	0.129989	0	0.181746	0	0.422872	0.106667
MER73	endothelial	0.666708	0.349038	0	0	0.324946	0	0.711713	0	0.574755	0.412249	0	1	0	0.355929	0.113408
LTR06	endothelial	0	0	0	0	0	0	0	0	1	0	0	0	0	0.182114	0
LTR48	endothelial	0.336201	0.474703	1	0.524851	0.253768	0	0.212261	0	0.0739348	0.0868435	0	0	0.0478061	0.311796	0.08654
MER41.int	endothelial	1	0.832715	0.453168	0.301445	0.130875	0.541558	0.70322	0.748705	0.44375	0.132196	0.272851	0.408428	0.0598286	0.28696	0.0916228
MLT1E3.int	endothelial	0.0813936	1	0	0	0	0	0	0.348001	0	0	0	0	0	0	0
PABL_A	endothelial	0.47278	0.552063	1	0.0506153	0.0388955	0.272549	0.413316	0.758888	0.933911	0.0453114	0	0	0.0905242	0.212676	0.0772143
LTR28C	endothelial	0.611568	0.731823	0	0.153324	0.281902	0.512641	0.337302	0.904638	1	0	0	0	0.10655	0.0156513	0.0603134
MLT1K.int	endothelial	0	0	0	0	0	0	0	0	0	0	0	0.700446	1	0.128399	0.0699241
LTR47A2	endothelial	0.588929	1	0.165466	0	0.051878	0.0909114	0.456696	0	0	0	0	0	0.0743806	0.0170033	0.0109928
MER50.int	endothelial	1	0.428981	0.786018	0	0.632513	0.422399	0.58633	0	0.514829	0	0	0	0	0.258492	0.0866037
PABL_B.int	endothelial	0	0	1	0.270758	0	0	0	0	0	0	0	0	0.278939	0.64236	0.0111472
MER66D	endothelial	0.928135	1	0.390666	0	0.0395003	0	0.770628	0	0	0.937196	0	0.331002	0.471322	0.145138	0.186975
LTR87	endothelial	0.774593	0.478292	0.109565	0.164896	0.191176	0	1	0.435905	0.308508	0	0	0.30196	0.0554473	0.246216	0.0777451
HERV1_LTRd	endothelial	0	0	0	0	0	0	0	0	0	0	0	1	0.960927	0.433639	0.258033
LTR80B	endothelial	0.564924	0.364016	0	0.268034	0.397188	0.726057	0	1	0	0	0	0	0	0.189184	0.105299
MLT1E2.int	endothelial	0	0.196642	0	0	0	0	0	0	0.194348	0	1	0	0	0.139235	0.0290972
MER57E1	endothelial	0.906843	0.441651	0.43377	0.205143	0.162736	0.248798	0.263507	1	0.394904	0.293515	0.750489	0.442207	0	0.38255	0.07671
MER41C	endothelial	0.42864	1	0.183196	0.636679	0.141483	0.318954	0.423391	0	0.322549	0.273228	0	0	0.168335	0.412247	0.174744
L1M2b	endothelial	0.433479	0	0	0	0	0	0	1	0	0	0	0	0	0.273375	0.0786385
MSTD.int	endothelial	1	0.692573	0.784442	0.0782125	0.179124	0.619855	0	0.743882	0.197148	0.784303	0	0	0.422616	0.209926	0.137282
LTR22B2	endothelial	0	0	0	0	1	0	0	0	0	0	0	0	0	0	0.0736645
LTR6A	endothelial	1	0.567583	0.636349	0.332262	0.0567746	0.513926	0.821507	0	0	0.113699	0	0.158744	0.0911368	0.420741	0.0618761
MamGypLTR3	endothelial	0.553174	0.479392	0	0	0.11945	0	1	0	0.768109	0.311744	0	0.306153	0.128012	0.217197	0.0209591
MER51C	endothelial	0.130945	0.340438	0.0505721	0.271572	0	0	1	0	0	0	0	0	0	0.201864	0.00991249
LTR35A	endothelial	0.449202	0	0.538143	0	0	1	0	0	0	0	0	0	0	0	0.0758376
HERV4_I.int	endothelial	1	0.832544	0.279454	0.3545	0.718067	0.0561402	0	0.246494	0.864985	0.421858	0	0.186732	0.228392	0.169925	0.195321
MLT1J2.int	endothelial	1	0.506504	0.218438	0	0	0.240423	0	0	0.318459	0.211434	0	0.253475	0	0.242352	0.0483666
MER34D	endothelial	1	0	0	0.33448	0	0.59285	0	0	0	0	0	0	0	0.369544	0.0674613
MER51.int	endothelial	0.302103	0.291383	0.166701	0.113628	0.102222	0.308252	1	0.184195	0.745504	0	0	0.0537957	0.186702	0.256977	0.0617278
MER65C	endothelial	1	0.580137	0.0711261	0.390833	0.0533665	0.704444	0.372363	0	0.285301	0.0543108	0	0	0	0.0833061	0.0502466
LTR12B	endothelial	1	0.29471	0.101753	0	0	0.313115	0	0.55429	0	0	0	0	0	0.0425095	0.0686844
MER57D	endothelial	0.591146	0.562684	0.4843	0.233958	0	0.125287	0.358708	0.25686	1	0.631243	0	0.724599	0	0.359929	0.0779591
LTR35	endothelial	0.518846	0	0.401308	0	0.0558768	0	0	0	1	0	0	0	0	0.209793	0.0605351
MER50B	endothelial	1	0.580225	0.319819	0	0.299087	0.130003	0	0.44922	0	0	0	0	0	0.246701	0.0754825
LTR1D	endothelial	0.873397	0.794796	0.275255	0.245707	0.391628	0.278824	0	1	0.79483	0	0	0	0	0.360922	0.0187179
MSTA1.int	endothelial	1	0	0	0	0	0	0	0	0	0	0	0	0	0.475013	0
MLT1G.int	endothelial	1	0.835184	0	0	0	0.473312	0	0	0	0	0	0	0	0.153849	0.0117573
LTR31	endothelial	0.142676	0.331701	0.283621	0.121971	0.0643985	0.288581	1	0.0726149	0.779406	0.252388	0	0	0	0.0819106	0.0140271
L1M3c	endothelial	0.862799	1	0.407883	0.604006	0.293778	0.463226	0.346416	0.539588	0	0.450625	0	0.124298	0.147241	0.384646	0.0897827
MER83B	endothelial	0.257574	1	0	0	0	0	0	0	0	0.366897	0	0	0	0.120184	0.0743676
PrimLTR79	endothelial	0.180737	0	0	0	0	0.567427	1	0	0	0	0	0	0	0.135502	0.0599683
LTR27	endothelial	0.0728512	0	0.0989894	0	0	0	0	0	0	0	1	0	0.191358	0	0.01414
HERV30.int	endothelial	0.129249	0	0	1	0	0.465446	0	0	0	0	0	0	0	0	0
MER74C	endothelial	0.152344	0.631206	0	0	0	0.750509	1	0.629257	0.559642	0	0	0.464952	0.229297	0.142593	0.131028
LTR1	endothelial	0	1	0	0	0.980887	0	0	0	0	0	0	0	0.409198	0.267437	0.379105
L1M3e	endothelial	0.507558	1	0.593031	0.271636	0.146493	0.526157	0.962029	0.0941955	0.274184	0	0	0.193901	0.0401297	0.210991	0.0514634
LTR6B	endothelial	1	0.664169	0	0	0.0760027	0.301012	0.235358	0.366142	0.922435	0.105913	0	0.340829	0.0583037	0.17846	0.12417
LTR38A1	endothelial	0.582219	0	0.294986	0	0	0	0	1	0	0.397982	0	0	0	0.0328923	0.0234756
HERVS71.int	endothelial	0.929114	0.520793	0.889914	1	0	0.574104	0	0.764563	0.249717	0	0	0.0854661	0.219737	0.309189	0.128838
MLT1F2.int	endothelial	0.389305	0.545758	0.398216	0.137038	0.25486	0.472435	1	0.121186	0.394709	0	0	0.332992	0.0530164	0.0113131	0.0680619
LTR90A	endothelial	0.457523	0	0	0	1	0.506094	0	0	0	0	0	0	0	0.484126	0.167221
THE1.int	endothelial	1	0	0	0	0	0	0	0	0	0	0	0	0	0.185756	0.212785
L1M6B	endothelial	0.764191	0.870364	0.329088	0	0.344558	0.660344	0.430949	1	0.133028	0	0	0.133865	0.170866	0.345635	0.0878366
LTR69	endothelial	0.228715	0	0.0737989	0	0	0	0	0	0	0	1	0.721892	0	0.091668	0.0425525
MLT1H2.int	endothelial	0.237744	0.461044	0	0	0.131698	1	0.424563	0.483871	0	0	0	0	0	0.272462	0.0349683
LTR1F2	endothelial	1	0	0	0	0	0.495483	0	0.468434	0.491489	0.137907	0	0	0	0.099217	0.0832918
MER89.int	endothelial	0.679571	0.321791	0.216286	0	0.412299	0.850163	1	0.960883	0	0	0	0	0	0.852607	0.126894
L1MEg1	endothelial	0.626516	1	0.100121	0.23933	0.182196	0.480944	0.108034	0.233905	0.4319	0.093669	0	0.141341	0.0675701	0.172497	0.0473188
LTR2752	endothelial	0	0.511857	0	0.0682338	0	0	0	0	1	0.12629	0	0	0	0.0317422	0.0731306
AluYb9	endothelial	0.660025	0.345103	0.227439	0.0681782	0	0.504969	1	0.453298	0.233737	0.0188529	0	0.129961	0	0.199329	0.085891
MLT1N2.int	endothelial	0.932396	1	0	0	0.338131	0.568921	0	0	0	0	0	0	0	0	0
MER70.int	endothelial	0.278882	1	0.0872296	0	0	0.199988	0	0	0	0	0	0.295056	0	0.0708994	0.0411083
L1M3d	endothelial	1	0.95907	0.401465	0	0.255099	0.965255	0	0	0	0.195108	0	0.473496	0	0.286267	0.115272
LTR5A	endothelial	0.913473	0.566256	0.624901	0.24007	0	1	0.841839	0.329254	0.972935	0.197799	0	0.160572	0	0.120079	0.288786
LTR34	endothelial	0.941301	0.307986	0	0	0.14921	0.247321	0.48305	0.41912	1	0	0	0	0	0.0583191	0.180408
HERV17.int	endothelial	0.731562	1	0.803167	0.331699	0.277117	0.408155	0.328675	0.731586	0.245038	0	0.644841	0	0.567696	0.621194	0.162892
L1PBb	endothelial	0.187714	0.208067	0.100147	0.217325	0.0828056	0.0691188	1	0.161244	0.348301	0.0383973	0	0.0461323	0	0.12176	0.0530117
PABL_A.int	endothelial	0.874092	0.572298	0.538453	0.215919	0.115962	0.531515	0.962118	1	0.825281	0.176894	0.426763	0.0970512	0	0.507468	0.0898273
MER68C	endothelial	0	0.527018	0.0968923	0.37551	0.267739	1	0.264503	0	0	0	0	0	0	0.362703	0.00704122
LTR91	endothelial	0.981684	0.657281	0	0	0	0	1	0	0	0	0	0	0	0.106996	0.0209849
LTR3B	endothelial	0	0	0	0	1	0.892207	0	0	0	0	0	0	0	0.309358	0
MER76	endothelial	0.266527	0.288138	0.299095	0.783624	0.204566	0	0	0.378209	0	1	0	0	0	0.116958	0.0966714
MLT1L.int	endothelial	0	0	0	0	0	0	0	0	0	0	0	0	0	1	0.808629
CR1.12_AMi	endothelial	0.137522	0.637776	0.107405	0.194943	0.167107	0	1	0	0	0	0	0	0	0	0.0129278
LTR47B4	endothelial	1	0	0	0	0	0	0	0	0	0	0	0	0	0.01682	0.0112784
LTR19.int	endothelial	0.647735	1	0.347718	0.248534	0	0.318971	0	0.190161	0.328454	0.101331	0	0.10988	0	0.256779	0.0309246
HERVIP10B3.int	endothelial	1	0.401025	0	0	0.311752	0.318616	0.188393	0.586282	0.658264	0.50564	0	0.0800457	0.202765	0.261276	0.100122
MSTC.int	endothelial	1	0.41923	0.219531	0	0	0	0	0.779675	0	0	0	0	0	0.313132	0.0845303
MER83B.int	endothelial	1	0.400447	0.735984	0	0	0	0	0	0.395775	0.102951	0	0	0	0.0930823	0.113043
MER61F	endothelial	0.0718858	1	0.134853	0	0	0.275004	0.452276	0	0	0	0	0	0	0.087392	0.00396699
LTR1A1	endothelial	1	0	0	0	0	0	0	0	0.889962	0	0	0.534459	0.219831	0	0.247635
MLT1F1.int	endothelial	0.597438	0.539511	0	0	0.364183	0.361139	1	0.41958	0.744293	0.282511	0	0.242443	0	0.188221	0.0158756
MLT1.int	endothelial	0.858934	0	0	0	0	1	0	0	0.480492	0.310257	0	0	0	0.344052	0.0741274
AluYk12	endothelial	0.555067	0.950523	0.340933	0	0	0.703059	0	0	0	0	0	0	0	1	0.0457997
LTR72B	endothelial	0	0.516788	0.864922	1	0	0	0	0	0	0	0	0	0	0.204563	0.0300379
LTR27E	endothelial	0.492982	0.456345	0	0	0.158025	1	0	0	0.610114	0.211153	0	0	0.198809	0.0731469	0.0868877
CR1.11_Crp	endothelial	1	0	0	0	0	0	0	0	0	0	0	0	0	0	0.140033
LTR22C0	endothelial	0.582942	0	0.36166	0	1	0.663054	0	0.624451	0	0	0	0.608114	0	0.220266	0.0577031
LTR68	endothelial	0.379594	1	0	0	0	0.91508	0	0	0	0	0	0.181567	0.435296	0.22293	0.00774475
CR1.L3B_Croc	endothelial	0	0	0	0	1	0	0	0	0	0	0	0	0	0	0
L1M2c	endothelial	0.769542	0.734992	0.366573	0.571509	0.150878	0.742431	1	0.805257	0.999108	0.468824	0	0.259234	0	0.417124	0.255688
LTR12_	endothelial	0.198515	0.812749	0.322487	0.239347	0.171295	0	0	1	0	0.589423	0	0.539251	0.158482	0.420602	0.301796
PRIMAX.int	endothelial	0.309655	1	0.46182	0	0	0	0	0	0	0	0	0	0	0.429034	0.0587079
UCON86	endothelial	0	0	0	0	0	0	0	0	0	0	0	1	0	0	0.0370669
L1M3de	endothelial	0.714197	0.32805	0.592316	0.336688	0.128019	0.291285	0.403854	0.475648	1	0.143644	0.97478	0.431571	0	0.384814	0.0696559
LTR28	endothelial	1	0.819541	0	0	0.480778	0.705708	0	0	0	0.645578	0	0	0	0	0.375201
L1MEa	endothelial	0.46801	0.39088	0.194066	0.212886	0.119836	0.0790982	1	0.448776	0.0509965	0.172147	0	0.196936	0.0894005	0.252485	0.230984
L1M2a1	endothelial	0.106935	0.657875	0	0	0.172671	0.200784	0	0.397818	0	0	0	1	0	0.082404	0.0838195
X2_LINE	endothelial	0.773155	1	0.432988	0	0.236584	0	0	0	0	0	0	0	0	0.437555	0.0487588
MER68B	endothelial	1	0.345947	0.498529	0.233211	0.27584	0.0916042	0.638404	0.108763	0.193158	0.707884	0	0	0.100498	0.153173	0.0731348
MER95	endothelial	0.905589	0.796007	0.313617	0	0.0622929	0.332798	1	0.707237	0.193282	0	0	0.246326	0	0.296194	0.0442444
MER61C	endothelial	0.265434	0	0.651567	0	0	0	0	1	0	0.335701	0	0	0	0.0417893	0.0648616
HERVK14.int	endothelial	0.170646	0.275076	0.425974	0.285538	0.113989	0.336377	0.169221	0.531801	1	0.0334872	0	0.204275	0	0.106531	0.080905
MER92A	endothelial	0.48175	0	0	0.906011	0	0	1	0	0	0	0	0	0	0	0
MER61E	endothelial	1	0	0	0	0	0	0	0	0	0	0	0	0	0	0.0877677
MER72B	endothelial	0	0.279193	0	0.220661	0	0	1	0.429429	0.467913	0	0	0	0	0.0244542	0
LTR47B3	endothelial	1	0	0.439882	0	0	0	0.971577	0	0.574216	0	0	0	0	0	0.0200688
L1M3b	endothelial	0.214091	0.388353	1	0.209305	0.362186	0.163432	0	0.24355	0.608808	0.110694	0	0	0	0.104107	0.0687351
LTR1B	endothelial	0.937462	0	0.465182	0.524303	0.125418	0	0	0	0	1	0	0	0	0.172271	0.0897654
LTR9C	endothelial	0.185723	0	0.222602	0	0.211663	0	1	0	0	0	0	0	0	0.0754027	0.00814265
HUERS.P2.int	endothelial	0.612483	0.390408	1	0.315511	0.152202	0.743864	0.525526	0	0.408315	0.524851	0	0.24521	0	0.0128018	0.114524
L1P4b	endothelial	0	0	0	0	0	1	0	0	0.992471	0	0	0	0	0	0.0662817
MER92D	endothelial	0.733734	0.284184	0	0	0	0.732405	0	1	0	0	0	0	0	0.188264	0.0484332
MER110.int	endothelial	0.496116	0.888824	0.973926	0.523002	0.120096	0.643321	1	0.228875	0	0	0	0.0959657	0	0.0993155	0.0186247
MER83C	endothelial	0.279356	1	0.132123	0	0	0	0	0	0	0	0	0	0	0.0761334	0.0158195
L1P4a	endothelial	0.715319	0.808259	1	0.673917	0.267803	0.811244	0.907226	0	0.256189	0.114641	0	0.405998	0.312859	0.535791	0.173862
L1P4d	endothelial	1	0	0	0	0	0	0	0	0	0	0	0	0	0	0.0378127
LTR53.int	endothelial	0.461273	0.902863	0.102527	0.35908	0.317208	0.324068	0.283353	0.980793	1	0	0	0	0.259717	0.101633	0.0193304
HERVP71A.int	endothelial	0.627726	1	0.28042	0.191542	0.0208632	0.109104	0	0.21617	0	0.718648	0	0	0	0.0931229	0.147782
MER101B	endothelial	0.671781	1	0	0	0	0	0	0	0	0	0	0	0	0	0.0397972
HERVL32.int	endothelial	0	0	0.443381	0	0	0	0	0	0	1	0	0	0	0.169348	0
LTR58	endothelial	0	0	0	0	0	0	0	0	0	0	0	0	0	0	1
LTR22E	endothelial	1	0.203227	0.221464	0	0	0	0	0.296736	0	0	0	0	0	0.280372	0.0784661
LTR73	endothelial	0	0	0	0	0	0.958787	0	0	0	0	0	0	1	0.58369	0.207505
MER57C2	endothelial	0.68238	0.336673	0.0985319	0.24386	0.127271	1	0	0.170128	0.668642	0.138692	0	0.763928	0.321235	0.20804	0.0751322
LTR35B	endothelial	0	0.895051	0	1	0.453662	0	0	0	0	0	0	0	0	0.0679982	0
LTR22B	endothelial	0.0923856	0.304273	0	0.201408	0.0947447	0.241839	0	0	0	0.215468	0	1	0	0.102142	0.0456445
L1PBa1	endothelial	0.370868	1	0.317699	0.524053	0.12308	0.10557	0.348849	0.234335	0.395871	0.547567	0.715462	0.528621	0	0.480723	0.258992
LTR27D	endothelial	0.180914	0	0	0	0	0	0	0	1	0	0	0.328388	0.555512	0	0
LTR19C	endothelial	0.172203	0	0	0	0	0.599815	0	0	0	0	0	1	0.299675	0	0.0506446
LTR25.int	endothelial	0.661475	1	0.389182	0.389749	0.152226	0.163807	0.676842	0.250645	0.399366	0	0	0	0.17712	0.237711	0.0924963
HERVH48.int	endothelial	0.683318	0.574818	0.394423	0.162727	0.113263	1	0.47124	0.621207	0.727968	0	0.688398	0.215184	0.195903	0.249378	0.0738153
LTR30	endothelial	0.329387	1	0	0	0	0.440762	0	0	0.561525	0	0	0.291398	0	0.313087	0.00508694
LTR52.int	endothelial	0	0	0	0	0	0	0	0	1	0	0	0	0	0.0184844	0.0146313
MSTB2.int	endothelial	0.191394	1	0	0	0	0	0	0	0	0	0	0	0	0.0399234	0
HERVKC4.int	endothelial	0	1	0	0	0.632401	0	0	0	0	0	0	0	0	0.64426	0.0343578
LTR22	endothelial	0	0	0	0.60357	0	0	0	0	1	0	0	0	0	0	0.0828718
MER67D	endothelial	0.835844	0	0.234628	0	0	0	1	0	0	0.79444	0	0	0	0.202935	0.104778
MER87B	endothelial	0	0	0.471656	0	0	0	0	0	0	0	0	1	0	0.208535	0.127973
MLT1G3.int	endothelial	1	0.899256	0	0	0	0	0	0	0.307449	0	0	0	0	0.0720227	0.0536035
MER88	endothelial	0.0904158	1	0	0	0	0	0	0	0.323147	0.237275	0	0	0	0	0.00963464
LTR108e_Mam	endothelial	0	0.377477	0.353264	0	0	0	0	0	1	0	0	0	0	0.106911	0.0380413
MER92C	endothelial	0.762186	0.571851	0	0	0.40599	0	1	0	0	0	0	0	0	0.0336276	0.26674
HERVI.int	endothelial	1	0.959156	0.50973	0	0	0	0.295871	0	0	0.324248	0	0	0.140334	0.0860249	0.174577
LTR10B1	endothelial	0.352841	1	0	0.312123	0.0722525	0	0	0.43726	0	0.732735	0	0	0	0.118861	0.0504012
LTR25	endothelial	0.590738	1	0	0.704942	0.35153	0.23049	0.30554	0.825813	0	0.0665038	0	0.206013	0	0.0953878	0.142346
LTR60	endothelial	1	0	0	0	0	0	0	0	0	0	0	0	0	0	0
LTR3	endothelial	1	0	0	0.236647	0.514178	0	0	0	0	0	0	0	0	0.101396	0.105028
HERVK3.int	endothelial	1	0.840129	0.267896	0	0.187192	0	0.72945	0.868929	0.512227	0.188304	0	0.146667	0.181931	0.559395	0.0884948
L1P	endothelial	0.28286	0	0	0	0	0	0	0	0	0	1	0.264506	0	0	0.0187569
LTR108d_Mam	endothelial	0.890917	0	0	0	0	0	0	1	0	0	0	0	0	0	0
LTR18C	endothelial	0	0	0	0	0	0	0	0	0	0	0	0	0	1	0
MER83A.int	endothelial	0	0	1	0	0	0	0	0	0	0	0	0	0	0	0.477365
LTR72	endothelial	0.554116	1	0.146543	0	0	0.558421	0	0	0	0	0	0	0.16841	0.0985994	0.0129855
MER76.int	endothelial	0	0	0	0	1	0	0	0	0	0	0	0	0	0.0936145	0.293001
LTR14C	endothelial	1	0	0	0	0	0	0	0	0	0	0	0	0	0	0.0554037
LTR47B	endothelial	0.359746	1	0	0	0	0	0	0	0	0	0	0	0	0	0.0667283
LTR38C	endothelial	0.524532	0.825985	1	0	0	0.13577	0	0	0	0	0	0	0	0.167644	0.0156529
HERV1_LTRa	endothelial	0.473842	1	0	0.919689	0	0.351318	0	0	0	0	0	0	0	0.0313627	0.0334825
L2.3_AMi	endothelial	0	0	0	0	0	1	0	0	0	0	0	0	0	0	0
LTR10G	endothelial	0	1	0	0.109994	0.157228	0	0	0.288969	0	0	0	0.0999947	0	0.0741601	0.0269074
LTR108b_Mam	endothelial	1	0	0	0	0	0	0	0	0	0	0	0	0	0.246205	0
ERVL47.int	endothelial	1	0.84778	0	0	0	0	0	0	0	0	0	0	0	0.0999398	0.0258114
LTR59	endothelial	0.760601	1	0	0.631137	0	0	0	0	0.570464	0	0	0	0	0.0262421	0
MER57E3	endothelial	1	0.810618	0.291574	0.146017	0.160786	0.313615	0.190837	0.336917	0.0856777	0.120703	0	0.164609	0.133762	0.15243	0.0249997
LTR70	endothelial	0.80118	0.924769	0.156688	0.431342	0.120299	0.619924	1	0.256849	0.497205	0	0	0.408816	0.0716179	0.333626	0.0820278
L1P4c	endothelial	0	0	1	0	0	0	0	0	0	0	0	0	0	0	0.107247
HERVK11D.int	endothelial	0	1	0	0	0	0	0	0	0	0	0	0	0	0.315828	0.164376
MLT1E1.int	endothelial	0	0	1	0	0	0	0	0	0	0	0	0	0	0	0
HERV1_I.int	endothelial	1	0	0	0	0	0	0	0	0	0	0	0	0.421509	0	0.11938
HERV15.int	endothelial	0.237139	0.46542	0.194573	0	0.754703	0.674511	0	1	0	0	0	0.809953	0	0.11076	0.145435
HERV.Fc1_LTR3	endothelial	0.0823517	1	0	0	0	0	0	0.306018	0	0	0	0	0	0.212615	0.00723787
HERV.Fc1.int	endothelial	1	0	0	0	0	0	0	0	0	0	0	0	0	0.330067	0
LTR43.int	endothelial	0	0	0	0	0	0	0	0	0	0.352926	0	1	0.879945	0.089824	0.0576467
MER9B	endothelial	0	0	0	0	0	0	0	0	0	0	0	0	0	1	0
LTR22C	endothelial	0	0	0	0	0	1	0	0	0	0	0	0	0	0	0.112087
HERV1_LTRb	endothelial	0	0	1	0	0	0	0	0	0	0	0	0	0	0	0
HERV.Fc1_LTR2	endothelial	0	0	0	0	0	0	0	0	0	0	0	0	0	0	1
L1P5	mTEC	0.273403	0	0	0	0	0	0	0.271617	0.131114	0.0791491	0	1	0.035294	0.669739	0
AluY	mTEC	1	0.832276	0.886618	0.294773	0.374296	0.897015	0.85164	0.856618	0.488681	0.377347	0	0.511512	0.24176	0.691668	0.271072
L1MB5	mTEC	1	0.734314	0.736416	0.262197	0.154673	0.675911	0.78446	0.889816	0.422301	0.293082	0	0.261361	0.246064	0.566169	0.176823
AluSc	mTEC	1	0.80535	0.841389	0.315198	0.252729	0.849607	0.817191	0.829583	0.334843	0.277116	0	0.275032	0.167615	0.598145	0.176679
HAL1	mTEC	1	0.727587	0.881766	0.299386	0.319074	0.863209	0.937112	0.933022	0.514489	0.386937	0	0.310612	0.333191	0.667939	0.242302
L2a	mTEC	1	0.79666	0.899463	0.533954	0.480484	0.894157	0.914413	0.892415	0.65078	0.525325	0.113239	0.351105	0.490504	0.683381	0.385738
L1MA9	mTEC	1	0.762796	0.991166	0.33298	0.22954	0.869684	0.982627	0.826766	0.468018	0.291762	0	0.677592	0.270077	0.68354	0.157251
L2	mTEC	1	0.705126	0.872007	0.292816	0.364991	0.882266	0.916248	0.894155	0.561913	0.407441	0	0.359697	0.3811	0.652207	0.269271
L1PA4	mTEC	1	0.69579	0.769241	0.172502	0.198166	0.915121	0.813855	0.934386	0.372651	0.352446	0	0.187326	0.254243	0.699355	0.232124
AluSg	mTEC	1	0.804673	0.821266	0.314331	0.240716	0.833868	0.821867	0.836601	0.370119	0.293236	0	0.333121	0.17836	0.623681	0.187431
MSTA.int	mTEC	1	0.782886	0.245147	0	0.501927	0.259639	0.694105	0.620495	0.365956	0.349426	0	0.447895	0.309835	0.674812	0.189214
L1PA8A	mTEC	1	0.683595	0.604522	0.335735	0.0971932	0.885928	0.995069	0.646849	0.318745	0.193959	0	0.295952	0.158924	0.752738	0.14334
AluJb	mTEC	1	0.853791	0.907317	0.307457	0.353924	0.912789	0.899302	0.879546	0.571316	0.432066	0.172594	0.552388	0.42228	0.719536	0.343661
L1MC4	mTEC	1	0.753671	0.882832	0.243901	0.197082	0.781049	0.921565	0.914536	0.526348	0.41745	0.178668	0.342978	0.360131	0.630155	0.220557
HUERS.P3b.int	mTEC	0.633994	0.644677	0.676306	0	0	1	0.6976	0.0418622	0.225511	0.207659	0	0	0.312769	0.34799	0.125921
AluJo	mTEC	1	0.812706	0.893658	0.286239	0.47731	0.87848	0.875409	0.873246	0.531667	0.390785	0.108208	0.341225	0.362107	0.686936	0.29589
L1MDb	mTEC	0.570148	0.540724	0.746034	0	0	0.619812	0.343262	0.774297	0.193394	0.2137	0	1	0.259804	0.23943	0.033845
AluSp	mTEC	1	0.873025	0.846661	0.301303	0.291838	0.837804	0.810418	0.822782	0.418725	0.325316	0.121049	0.396587	0.239043	0.687348	0.23333
L1MC1	mTEC	1	0.746983	0.854983	0.286375	0.234703	0.67031	0.799067	0.757609	0.434999	0.314648	0	0.152926	0.293015	0.670076	0.177014
MLT1C	mTEC	1	0.896765	0.761705	0.141947	0.393517	0.50886	0.817826	0.728957	0.477004	0.530008	0.517974	0.287336	0.398767	0.502088	0.205659
AluSz	mTEC	1	0.826899	0.889362	0.310089	0.365028	0.894203	0.852164	0.867543	0.498839	0.381294	0.108901	0.446151	0.314322	0.722506	0.296573
AluSx1	mTEC	1	0.828659	0.885468	0.295916	0.429658	0.886867	0.857398	0.853983	0.496047	0.38786	0.10567	0.463135	0.313419	0.668605	0.294471
MIRb	mTEC	1	0.819227	0.913715	0.446703	0.522842	0.921892	0.927821	0.912648	0.641235	0.568262	0.123538	0.358669	0.529792	0.705367	0.376684
MLT1K	mTEC	1	0.803386	0.895315	0.30857	0.188592	0.88577	0.886221	0.80336	0.41547	0.43659	0	0.92369	0.323362	0.616373	0.16528
LTR5_Hs	mTEC	1	0.79204	0.976103	0.319122	0.20444	0.589161	0.621563	0.671651	0.298554	0.167121	0.792281	0.328445	0.162533	0.756887	0.102244
HERVIP10F.int	mTEC	0.679761	1	0.26942	0	0	0.499837	0.99517	0.617722	0.102515	0.566337	0	0	0.775756	0.498635	0.188092
LTR16A1	mTEC	0.705145	0.60855	0.313787	0	0.478421	1	0.248675	0.256306	0.346138	0.580178	0	0	0.152927	0.525813	0.16722
L1M6	mTEC	0.989308	0.708089	1	0.251442	0.342359	0.807517	0.975911	0.84508	0.428611	0.289821	0	0.143741	0.210475	0.344066	0.162452
THE1D.int	mTEC	1	0.823214	0.542335	0	0.259887	0.613988	0.700263	0.293636	0.242124	0.329948	0	0	0.23686	0.383812	0.0862015
LTR48B	mTEC	0.66169	0.666865	0.747802	0.693927	0.729078	0.307969	1	0.994696	0.121058	0.14474	0	0	0.0734657	0.998179	0.0330613
L2c	mTEC	1	0.759686	0.906236	0.289877	0.367852	0.920452	0.93229	0.917881	0.616999	0.513177	0	0.507565	0.462785	0.69688	0.349588
L2b	mTEC	1	0.752182	0.896498	0.399227	0.600774	0.893505	0.892001	0.885937	0.563373	0.481565	0.172044	0.358351	0.446287	0.655718	0.338248
L1PA2	mTEC	0.936061	0.75288	0.904971	0.345005	0.3722	1	0.989364	0.991213	0.263264	0.362713	0	0.423929	0.232949	0.911963	0.264948
AluSq	mTEC	1	0.754534	0.819145	0.285258	0.179021	0.796793	0.734604	0.781175	0.288025	0.224949	0.16114	0.220757	0.131896	0.595973	0.127391
L1MC5a	mTEC	1	0.799716	0.867087	0.3557	0.367058	0.831576	0.899818	0.856169	0.416253	0.289961	0	0.173563	0.254395	0.585403	0.183529
ERVL.E.int	mTEC	1	0.580035	0.810262	0.369927	0.0943372	0.772715	0.589701	0.611169	0.501408	0.449739	0	0.521859	0.292258	0.580076	0.181453
LTR81B	mTEC	0.439149	0.227707	1	0	0	0.199338	0.346186	0.524061	0.0677043	0.0772862	0	0	0.0414775	0.183486	0.0246213
L1MA3	mTEC	1	0.777406	0.849174	0.122046	0.246	0.684102	0.905979	0.828337	0.528185	0.366688	0	0.2121	0.322324	0.68684	0.1733
AluSc8	mTEC	1	0.824711	0.799782	0.313164	0.219817	0.767191	0.829473	0.805535	0.299055	0.255005	0	0.304768	0.134746	0.565761	0.156761
MIRc	mTEC	1	0.800823	0.88553	0.217127	0.488426	0.855338	0.862895	0.918605	0.553824	0.514203	0.346548	0.522498	0.427725	0.669515	0.285316
LTR49.int	mTEC	1	0.958639	0.699051	0	0	0.796006	0.342899	0.814941	0.193435	0.228084	0	0	0.195847	0.263032	0.179286
LTR12	mTEC	0.518756	0.45132	0.264424	0	0.381765	0.491664	0	0.190059	0.393401	0.898283	0	0	0.202018	1	0.160668
L1MD1	mTEC	1	0.973967	0.866926	0.190797	0.199793	0.786804	0.820021	0.739906	0.466857	0.259843	0	0.241337	0.20704	0.572335	0.194314
THE1B	mTEC	1	0.754916	0.776613	0.594073	0.212049	0.671448	0.840199	0.60287	0.420692	0.454549	0	0.61213	0.25578	0.67898	0.190058
AluSq2	mTEC	1	0.779943	0.86255	0.318056	0.350914	0.864081	0.850195	0.837779	0.427515	0.335177	0	0.353007	0.243067	0.639522	0.223174
MSTD	mTEC	0.968478	0.691626	0.85551	0.274043	0.329031	0.681451	0.474601	0.717442	0.517138	0.782851	1	0.386594	0.432331	0.480238	0.111977
L1PB1	mTEC	1	0.73284	0.864833	0.207267	0.250902	0.788563	0.873496	0.808679	0.544165	0.401483	0	0.597142	0.379112	0.781884	0.274134
AluJr	mTEC	1	0.805184	0.89654	0.512681	0.418081	0.915619	0.906878	0.878009	0.553935	0.410453	0.160153	0.350634	0.360314	0.681364	0.307304
L1MA4A	mTEC	0.988031	0.76467	0.755991	0.53486	0.245873	0.68023	1	0.70517	0.460581	0.253683	0	0.407973	0.272022	0.818282	0.197725
MLT2B1	mTEC	1	0.74624	0.619153	0.821891	0.267862	0.0933548	0.82623	0.472872	0.480443	0.476774	0	0.845902	0.368899	0.963134	0.235314
AluSx	mTEC	1	0.840582	0.898969	0.315446	0.40624	0.879483	0.856945	0.861848	0.513537	0.406026	0	0.476255	0.31642	0.636525	0.312815
MER57.int	mTEC	0.571805	0.576939	0.381508	0	0.297547	0.315785	1	0.33961	0.2423	0.350768	0	0	0.14486	0.189687	0.112288
L1MB1	mTEC	1	0.749876	0.847774	0.188183	0.40559	0.709572	0.676483	0.724072	0.36026	0.202039	0	0.380929	0.209818	0.582109	0.131132
L3	mTEC	1	0.722492	0.858763	0.280439	0.4542	0.815223	0.868731	0.902267	0.503648	0.418969	0.226233	0.813945	0.32056	0.591743	0.220741
L1PB3	mTEC	1	0.6896	0.820174	0.236667	0	0.949022	0.916218	0.914911	0.3412	0.225377	0	0.135295	0.214585	0.75996	0.133885
L1MB8	mTEC	1	0.721543	0.786886	0.43836	0.170981	0.825649	0.829115	0.882181	0.498698	0.34764	0	0.233225	0.299336	0.63164	0.238854
L1MEf	mTEC	0.930723	0.662061	0.800293	0.278757	0.159093	0.749542	1	0.767358	0.445596	0.288405	0	0.358897	0.255606	0.661939	0.173286
L1PA13	mTEC	1	0.795509	0.71655	0.143704	0.299341	0.602971	0.958111	0.694331	0.389936	0.264909	0	0.360433	0.239682	0.74121	0.142898
L1ME1	mTEC	1	0.763228	0.902878	0.255265	0.388907	0.797977	0.942424	0.89361	0.554688	0.39441	0	0.369814	0.386616	0.739851	0.251066
LTR49	mTEC	0.80385	0.63379	0.580544	0	0	0.312716	1	0.715453	0.196883	0.231134	0	0	0.128719	0.390323	0
L1PA17	mTEC	1	0.797	0.764281	0	0.245237	0.770029	0.80231	0.767611	0.383151	0.276765	0	0.230254	0.241952	0.845352	0.220588
MLT1A0	mTEC	1	0.665748	0.832506	0	0.378677	0.61072	0.828431	0.725811	0.465302	0.565407	0	0.250273	0.313626	0.5898	0.205459
LTR32	mTEC	0.722389	0.288212	0.513539	0	0	0.251623	0.746512	0.154486	0.288764	0.235009	0	1	0.361776	0.539557	0.303415
MLT2C1	mTEC	0.24373	0.122149	0.240471	0	0	0.142984	0.165574	0.134006	0.151983	0.26632	1	0	0.0709851	0.14565	0.0368432
MIR	mTEC	1	0.811193	0.888078	0.274742	0.445543	0.87246	0.903421	0.879397	0.615241	0.517834	0.353471	0.648236	0.481858	0.648428	0.390546
L1ME4c	mTEC	1	0.762995	0.841359	0.26462	0.116822	0.751612	0.833873	0.742472	0.304999	0.230027	0	0.28736	0.177642	0.59094	0.104626
L1ME2	mTEC	1	0.716783	0.964408	0.188291	0.250229	0.747359	0.941209	0.87959	0.482099	0.330895	0	0.362888	0.302812	0.668306	0.173467
L1MA2	mTEC	1	0.838681	0.822603	0.244232	0.316687	0.673429	0.89163	0.807618	0.451	0.301379	0	0.157071	0.265579	0.714009	0.194373
L1MB3	mTEC	1	0.768739	0.78434	0.26406	0.330026	0.724382	0.864357	0.769913	0.449844	0.31489	0.228022	0.209305	0.299744	0.579449	0.192148
L1MC3	mTEC	0.963223	0.773473	0.804011	0.342633	0.290843	1	0.911086	0.845417	0.393503	0.306012	0	0.323754	0.248625	0.643703	0.1691
MER4B	mTEC	0.790344	0.529847	0.71037	0	0.579255	0.168826	0.111374	0.203057	0.301692	0.165862	0	1	0.152738	0.5534	0.150514
THE1A	mTEC	1	0.676046	0.696314	0.557313	0.106836	0.226292	0.592251	0.993888	0.283319	0.49456	0	0	0.155879	0.493544	0.128917
LTR40A1	mTEC	0.378304	0.294141	0.368491	0	0	0.745767	0	0.575402	0.334658	1	0	0	0.0229202	0	0.0612761
LTR8B	mTEC	0.663282	0.608265	0.843494	0	0.459833	0.432948	1	0.461525	0.375481	0.476917	0	0.507861	0.379566	0.725199	0.228262
MER11C	mTEC	0.957746	1	0.769469	0.726993	0	0.567016	0.712566	0.58811	0.308706	0.19951	0	0	0.157955	0.42831	0.104609
MLT1E1A	mTEC	0.986292	0.398091	1	0	0.145559	0.229142	0.410028	0.702997	0.367217	0.419246	0	0.587459	0.681871	0.794773	0.232597
MIR3	mTEC	1	0.76803	0.864907	0.24813	0.434365	0.919473	0.885062	0.894674	0.564322	0.493647	0.169806	0.447464	0.426034	0.700494	0.305528
LTR7	mTEC	0.370996	0.281317	0.33318	0.383132	0.0610525	0.172684	0.253034	0.285184	0.149815	0.154927	0	1	0.0904816	0.258085	0.0664436
LTR26	mTEC	0.378391	0.805668	0.176275	0	0.744033	0	0.143793	0.407792	0.251285	0.513174	0	0	0.191219	1	0.210761
MER4A	mTEC	0.824645	0.466206	0.389647	0	0.898934	0.303657	1	0.979858	0.339314	0.303855	0	0	0.329979	0.697755	0.128579
AluSz6	mTEC	1	0.801923	0.893673	0.321811	0.279624	0.861053	0.833661	0.843089	0.435631	0.301674	0	0.271421	0.26576	0.653051	0.222197
L1ME3E	mTEC	0.965085	0.738875	0.787847	0.23616	0.202945	0.785965	1	0.78729	0.320931	0.2009	0	0.333152	0.204667	0.66674	0.1395
MSTB1	mTEC	1	0.751927	0.549521	0.703257	0	0.495808	0.237565	0.561015	0.39973	0.346803	0	0.251216	0.2447	0.695567	0.142265
L1PA8	mTEC	1	0.745915	0.883389	0.333518	0.132695	0.810671	0.670013	0.763994	0.329892	0.239163	0	0.25556	0.198196	0.662158	0.155492
L1MDa	mTEC	1	0.796509	0.977747	0.327969	0.347947	0.924871	0.870315	0.775185	0.541531	0.308171	0	0.270889	0.296096	0.748917	0.233092
L1MEd	mTEC	1	0.70821	0.906983	0.31636	0.233328	0.811922	0.903787	0.847413	0.493917	0.339012	0	0.568384	0.312738	0.701977	0.213601
L1M5	mTEC	1	0.771523	0.940576	0.225865	0.253024	0.89	0.978604	0.934851	0.54861	0.391098	0.182208	0.296718	0.37938	0.720842	0.254897
MLT1J	mTEC	1	0.798779	0.702338	0.172681	0.176502	0.58315	0.857266	0.708519	0.379556	0.423241	0	0.300096	0.296474	0.535933	0.21066
AluJr4	mTEC	1	0.801131	0.857737	0.311164	0.198162	0.848105	0.826668	0.805459	0.426667	0.273657	0	0.437653	0.199213	0.578125	0.171652
AluSg4	mTEC	1	0.7556	0.777397	0.302425	0.10802	0.778105	0.677746	0.713787	0.153326	0.13258	0	0.230679	0.0753728	0.47982	0.0701301
THE1D	mTEC	1	0.787902	0.678276	0.40582	0.195925	0.606502	0.534034	0.68064	0.411835	0.539916	0	0.260993	0.231747	0.680328	0.138498
LTR33	mTEC	0.952225	0.808471	0.494593	0	0.127459	1	0.266939	0.406349	0.38675	0.462177	0	0.223573	0.365137	0.819672	0.141172
MER66.int	mTEC	0.544206	0.342339	0.38347	0	1	0.466523	0.657079	0.182643	0.164601	0.266712	0	0	0.1343	0.140052	0.115801
AluSx4	mTEC	1	0.76347	0.781466	0.246582	0.140732	0.803008	0.84305	0.79691	0.234279	0.168856	0	0.233549	0.0946112	0.549508	0.110875
MER67B	mTEC	1	0.879187	0.79154	0	0	0.541072	0	0.317937	0.29985	0.232519	0	0	0.309551	0.561938	0.0868785
L1PA3	mTEC	1	0.730228	0.866791	0.118071	0.294604	0.968735	0.944189	0.961787	0.310625	0.366568	0	0.269072	0.249986	0.779856	0.237286
L1ME4b	mTEC	1	0.770174	0.790918	0.313074	0.347059	0.780163	0.873594	0.830165	0.438073	0.333538	0	0.296527	0.247901	0.574978	0.20331
MER4.int	mTEC	0.716018	0.521444	1	0	0.111322	0.486435	0.694605	0.564426	0.224222	0.26417	0	0.259687	0.222598	0.695197	0.112448
L1MD2	mTEC	1	0.898265	0.92396	0.160347	0.404216	0.903391	0.987292	0.77029	0.379674	0.271108	0	0.174127	0.219178	0.787845	0.162998
LTR88c	mTEC	0.230392	0.298642	0.0626612	0	1	0.336033	0	0	0.123417	0.23568	0	0	0.169994	0.811863	0.126809
MLT2D	mTEC	1	0.871442	0.592221	0	0.665038	0.464636	0.660249	0.356622	0.358576	0.273383	0	0	0.25877	0.849609	0.104045
MER66B	mTEC	0.706747	0.176619	0.206321	0	1	0.282604	0.0520106	0.50596	0.37372	0.550371	0	0.597864	0.164301	0.464368	0.0426108
LTR10D	mTEC	1	0.873207	0.481991	0	0	0.953366	0.703204	0.484705	0.120114	0.133072	0	0	0.107909	0.365855	0.101106
L1PA6	mTEC	1	0.677684	0.685231	0.279638	0.306943	0.748541	0.794	0.699311	0.432416	0.330281	0	0.296385	0.277132	0.655207	0.22229
L1MCa	mTEC	1	0.739693	0.80249	0.31722	0.170853	0.591674	0.855713	0.728021	0.41044	0.37599	0	0.355988	0.319204	0.775125	0.25831
L1PA11	mTEC	1	0.74753	0.715916	0	0.24701	0.781788	0.626085	0.705449	0.343786	0.260511	0	0.27695	0.196372	0.719406	0.174549
MER21C	mTEC	1	0.680117	0.52359	0	0.188148	0.54197	0.875354	0.497875	0.358175	0.339266	0	0	0.343406	0.339475	0.152914
L1PA7	mTEC	0.958384	0.716919	0.797326	0.218031	0.147879	0.830786	1	0.832559	0.450629	0.361531	0	0.351322	0.334173	0.639703	0.245228
MLT1F2	mTEC	0.969335	0.608607	0.707292	0	0	0.7859	1	0.69388	0.444318	0.588224	0.65902	0	0.282657	0.431305	0.190206
MLT1A0.int	mTEC	0.82811	0.768396	1	0	0	0.499018	0.899529	0.296775	0.115601	0.220107	0	0.956828	0.192837	0	0.112887
LTR17	mTEC	1	0.668551	0.342787	0	0.423242	0.52748	0.451498	0.430016	0.148237	0.221356	0	0	0.19411	0.632449	0.13983
LTR78B	mTEC	1	0.512747	0.879002	0	0	0.441163	0.64134	0.467555	0.236482	0.361305	0	0	0.218274	0.136783	0.0676617
CR1.L3A_Croc	mTEC	0.713415	0	1	0	0	0.8787	0	0.502915	0.204982	0.3303	0	0	0.0766987	0	0
MLT1G3	mTEC	0.634817	0.581091	0.589595	0	0.27923	0.426553	0.44819	0.358157	0.224183	0.240204	0	1	0.144611	0.373153	0.128713
MSTA	mTEC	1	0.785017	0.761628	0.375331	0.283213	0.57572	0.544837	0.699041	0.380946	0.408364	0	0.421201	0.279064	0.633459	0.16603
L1ME2z	mTEC	1	0.747271	0.820943	0.288633	0.243094	0.697826	0.725349	0.712778	0.333858	0.282724	0	0.185627	0.207079	0.557186	0.150949
AluYc3	mTEC	1	0.633099	0.608236	0	0.122299	0.51524	0.597069	0.486329	0.0635967	0.075633	0	0.214522	0.0278135	0.219904	0.0752012
MLT1B	mTEC	1	0.879987	0.651775	0.162649	0.29886	0.572231	0.781532	0.732574	0.404729	0.441595	0	0.877879	0.319093	0.72886	0.195271
THE1B.int	mTEC	1	0.684424	0.46999	0	0	0.533402	0.457638	0.268652	0.457983	0.568069	0	0.271171	0.323831	0.33001	0.209846
AluSx3	mTEC	1	0.775073	0.823034	0.302782	0.260971	0.846837	0.821646	0.807914	0.385387	0.278355	0.123984	0.413439	0.184321	0.59469	0.176428
L1ME3B	mTEC	1	0.699987	0.736203	0.145583	0.0846772	0.778579	0.955687	0.842257	0.395892	0.280491	0	0.365147	0.178819	0.586487	0.131228
THE1C	mTEC	1	0.895977	0.828423	0.298572	0.306767	0.603092	0.750748	0.433374	0.321439	0.387713	0.628824	0.170684	0.238726	0.716541	0.116393
MLT1F	mTEC	1	0.874906	0.638431	0.328984	0.489683	0.636939	0.762451	0.393117	0.440251	0.55439	0	0.18807	0.272282	0.330957	0.158555
L1MEg	mTEC	1	0.738293	0.972086	0.182268	0.190711	0.854741	0.91204	0.945511	0.470796	0.349309	0	0.285663	0.312868	0.744498	0.20497
HERVL.int	mTEC	1	0.524357	0.633829	0	0.206678	0.495459	0.422842	0.473387	0.370413	0.357424	0	0.362528	0.246681	0.518693	0.212553
L1P1	mTEC	1	0.795424	0.595128	0	0.0938575	0.495595	0.781353	0.579711	0.22625	0.249814	0	0.210401	0.121992	0.850499	0.127288
L1MB7	mTEC	1	0.78514	0.869655	0.329814	0.281591	0.859831	0.860381	0.893262	0.547685	0.412775	0	0.321145	0.371412	0.717746	0.246252
AluSg7	mTEC	1	0.773232	0.735632	0.303153	0.472419	0.672657	0.702791	0.727507	0.202927	0.167604	0	0.205833	0.0878981	0.503184	0.0719279
THE1C.int	mTEC	0.906419	0.922561	0.390639	0	1	0.680216	0.428413	0.260709	0.381796	0.357529	0	0	0.212783	0.781294	0.310447
LTR43	mTEC	0.369805	0.219116	0.21052	0	0	0.260561	0.752655	0.294848	0.169005	0.0927965	0	1	0.0909413	0	0.138102
L1MEc	mTEC	1	0.763739	0.927368	0.197169	0.252887	0.797799	0.956533	0.853703	0.526481	0.354141	0	0.315378	0.315104	0.667421	0.218795
L1M3a	mTEC	0.46369	0.541549	0.414501	0	1	0.518486	0.230396	0.314456	0.636963	0.469536	0	0	0.34162	0.186878	0.196845
L1MC5	mTEC	1	0.751624	0.794177	0.200763	0.0698466	0.873688	0.836085	0.921942	0.420856	0.315875	0	0.225298	0.264399	0.534333	0.167671
L1MB4	mTEC	1	0.832199	0.847896	0.258916	0.2875	0.793453	0.876558	0.799229	0.377478	0.268815	0	0.179864	0.213753	0.608445	0.180539
L1ME3F	mTEC	1	0.536738	0.807944	0	0.16224	0.751239	0.880143	0.925122	0.402648	0.212227	0	0.217673	0.19154	0.655939	0.148926
MLT1O	mTEC	1	0.720172	0.704126	0.94585	0.566686	0.849681	0.772455	0.500225	0.394488	0.330657	0	0.337875	0.176436	0.831014	0.086197
MSTB.int	mTEC	0.542622	0.94312	0.657464	0	0	0.274511	0.708306	1	0.338917	0.523872	0	0	0.190301	0.28054	0.398981
LTR12C	mTEC	0.540686	0.397538	0.103843	0	0.647719	0.198025	0.284227	0.259913	0.567634	1	0	0.477755	0.737452	0.0934514	0.88143
MER11B	mTEC	0.487763	0.344646	0.322151	0	0	0	1	0.194342	0.136067	0.161855	0	0	0.16574	0.36097	0.0847187
MLT1D	mTEC	1	0.837652	0.90705	0	0.285252	0.69117	0.861253	0.742041	0.537876	0.485146	0	0.391697	0.355701	0.583145	0.219027
L1MEg2	mTEC	0.548895	0.592179	0.482662	0	0	0	0.110231	0.336254	0.129489	0.127042	0	0	0.1669	1	0.0755547
L1MA5	mTEC	0.581125	0.429679	0.502571	0.205657	0.0640954	0.60951	1	0.468263	0.159171	0.109883	0	0.142866	0.11647	0.692276	0.0826634
L1ME3	mTEC	1	0.721343	0.85235	0.14098	0.144072	0.81454	0.924092	0.71242	0.379063	0.291038	0	0.145099	0.233579	0.589814	0.136206
MER65A	mTEC	0.492478	0.409285	0.621933	1	0	0.189577	0.226777	0.372591	0.281009	0.150439	0	0.357218	0.0929939	0.289756	0.0627007
L1M1	mTEC	0.493696	0.394618	0.469858	0.488159	0.220475	0.398151	0.543693	0.418707	0.25033	0.486568	0.305322	1	0.163038	0.396625	0.450116
L1ME3C	mTEC	1	0.845963	0.638693	0	0.11859	0.987848	0.737156	0.77416	0.269922	0.187626	0	0.291888	0.141917	0.773784	0.0835899
HERVK22.int	mTEC	0.288312	0.183147	0.122779	0	1	0.433011	0.182593	0.0821611	0.333866	0.393983	0	0	0.413289	0.440638	0.289683
MLT2B3	mTEC	0.557342	0.386512	0.368912	0.450893	1	0.470033	0.318168	0.422502	0.517751	0.684632	0.593393	0.570328	0.527983	0.281977	0.23868
LTR86C	mTEC	1	0.522268	0.390536	0	0	0	0	0.28241	0.0776219	0.0856285	0	0	0.062355	0	0.0592041
ERVL.B4.int	mTEC	1	0.896265	0.873331	0.659113	0.442469	0.736359	0.529262	0.679161	0.505735	0.352383	0	0	0.221609	0.91683	0.166842
LTR40a	mTEC	1	0.279352	0.914757	0	0	0.879637	0.168996	0.572521	0.355211	0.343914	0	0	0.259292	0.614243	0.184134
L1M2	mTEC	1	0.766124	0.897216	0.215167	0.193376	0.699674	0.771064	0.780959	0.433901	0.304852	0	0.365257	0.250007	0.70919	0.17525
LTR16B	mTEC	0.435423	0.214753	1	0	0	0.216492	0	0.248872	0.177371	0.144055	0	0	0.0735506	0.21972	0.115349
L1PREC2	mTEC	1	0.76863	0.781064	0.1557	0.110002	0.770003	0.652698	0.74209	0.383222	0.266911	0	0.650356	0.220881	0.699078	0.166932
MER39	mTEC	1	0.584944	0.800102	0	0	0.460486	0.427524	0.652239	0.354633	0.317345	0	0	0.288744	0.511613	0.114506
L4_A_Mam	mTEC	1	0.738752	0.773542	0	0.271855	0.669033	0.955222	0.679837	0.396716	0.284911	0	0.140139	0.229511	0.573886	0.0989299
L1MA4	mTEC	1	0.718916	0.775223	0.187521	0.150315	0.8487	0.875742	0.758175	0.44075	0.292605	0	0.618038	0.268886	0.682349	0.171898
FLAM_C	mTEC	0.993765	0.821376	0.840469	0.352239	0.235063	1	0.858448	0.802453	0.398944	0.295512	0	0.383285	0.19832	0.698438	0.179459
MER21.int	mTEC	0.793886	0.415659	0.292821	0	0	0.454934	0.746812	1	0.196071	0.198227	0	0	0.175478	0.294519	0.0800011
L1M3	mTEC	0.862016	0.655652	0.622379	0.152091	0.237306	0.709654	1	0.787368	0.266835	0.192448	0	0.0869456	0.164487	0.466058	0.105882
LTR108a_Mam	mTEC	0.493929	0	0	0	0	0	0	0	1	0.130204	0	0	0.210666	0	0.479796
HERVE_a.int	mTEC	0.195318	0.116418	0.0775435	0	0	0	0	0	0.130404	1	0	0	0.253211	0.214656	0.278336
MLT1E1	mTEC	0.942742	0.997042	0.683371	0	0.33533	0	0.714884	0.556623	0.316747	0.347192	0	1	0.211334	0	0.162864
L1MA1	mTEC	1	0.732787	0.94218	0.229352	0.10119	0.742513	0.997687	0.712487	0.443708	0.248977	0	0.323549	0.228809	0.72506	0.178393
L1PA15.16	mTEC	0.739152	0.555086	0.379668	0	0	0.338381	1	0.370525	0.702519	0.293747	0	0.397337	0.462395	0.371194	0.366444
L1M4c	mTEC	0.984056	0.75527	0.706895	0	0.265974	0.688083	1	0.997033	0.432959	0.270352	0	0.457132	0.24652	0.719685	0.20922
L1MA5A	mTEC	1	0.763277	0.58111	0	0.0644594	0.574449	0.76618	0.690555	0.319882	0.21524	0	0.279014	0.286291	0.666275	0.125405
L4_C_Mam	mTEC	1	0.843246	0.717916	0.514427	0	0.705819	0.950203	0.828995	0.36937	0.246545	0	0.33084	0.277031	0.514826	0.158325
THE1A.int	mTEC	1	0.455893	0.25322	0	0	0.340414	0.368153	0.369873	0.457604	0.523922	0	0.576858	0.209886	0.33025	0.242094
HAL1ME	mTEC	0.979029	0.780989	0.692213	0.253113	0.181523	0.666991	1	0.664451	0.400333	0.258021	0	0.905404	0.175999	0.628074	0.155559
MER31B	mTEC	0.918778	0.644451	0.543189	0.913417	0	0.727719	0.603414	0.451035	0.498872	0.289678	0	0	0.283077	1	0.311161
HERVK11.int	mTEC	0.807197	1	0.785618	0	0	0.672806	0.222374	0.62632	0.152197	0.118576	0	0	0.0836987	0.407825	0.0144934
HUERS.P1.int	mTEC	0.647494	1	0.524149	0	0.271895	0.333428	0.301135	0.591534	0.243186	0.48452	0	0.810829	0.510439	0.323663	0.12779
L1PA14	mTEC	1	0.811186	0.776909	0.250271	0.191986	0.537978	0.669982	0.601673	0.341757	0.262817	0	0.35306	0.251584	0.589647	0.0836869
MLT1L	mTEC	1	0.800964	0.842133	0	0.198731	0.489332	0.652306	0.755253	0.403794	0.398043	0	0.478879	0.289102	0.674884	0.149258
MLT1I	mTEC	1	0.631621	0.875504	0	0.431555	0.542388	0.639541	0.849254	0.391068	0.430261	0	0.417617	0.237165	0.493964	0.16143
L1ME4a	mTEC	1	0.782415	0.876866	0.259245	0.305425	0.989186	0.943978	0.936759	0.50115	0.377569	0	0.278111	0.316827	0.628484	0.233467
HERV9.int	mTEC	0.764158	0.302502	0.0737167	0	0.514133	0.683492	0.17124	0.28307	0.243593	0.723261	0	0	1	0	0.0885563
MSTB2	mTEC	1	0.432376	0.399327	0	0	0.663715	0.936861	0.133044	0.30156	0.1642	0	0.597769	0.174592	0.132208	0.110689
L1PBa	mTEC	1	0.713319	0.576025	0.283366	0	0.564288	0.855074	0.596398	0.526064	0.334447	0	0.492451	0.304223	0.687198	0.153213
AluYb8	mTEC	0.996059	0.785571	0.719745	0.495918	0.446947	1	0.724371	0.790311	0.079479	0.14505	0	0.519298	0.01043	0.699744	0.0624794
AluYm1	mTEC	1	0.708524	0.742068	0.355821	0.178421	0.73132	0.627092	0.846769	0.131302	0.147663	0	0.11246	0.0377942	0.488717	0.0831567
AluYa5	mTEC	1	0.929707	0.7832	0.261131	0.156785	0.839551	0.91315	0.78799	0.0530235	0.141669	0	0.320868	0.0118287	0.703993	0.163189
LTR56	mTEC	0.641885	0.382543	0.178549	0	0.186256	0.211296	0.364426	0.362174	0.238322	0.198757	0	1	0.153336	0.200821	0.142736
L1ME3G	mTEC	1	0.793114	0.813076	0.272834	0.315941	0.705143	0.850593	0.839499	0.417505	0.313975	0	0.200363	0.284291	0.601634	0.181793
LFSINE_Vert	mTEC	0.745468	1	0.598737	0.687474	0.303313	0.608227	0.451143	0.88872	0.148362	0.134374	0	0.969824	0.10633	0.409086	0.0861217
HERVL18.int	mTEC	0.103814	0.142994	0	0	0	0	0.371391	0	0.21518	0.679775	0	1	0.73097	0	0.248131
L1P2	mTEC	0.949961	0.888317	0.755617	0.359441	0.158585	0.90918	0.691216	1	0.304908	0.284828	0	0.205481	0.220722	0.532552	0.197207
MLT1H1	mTEC	0.833362	0.407274	0.362343	1	0	0.284634	0.256418	0.48149	0.280126	0.304185	0	0.154322	0.178329	0.241794	0.0983597
L1M4	mTEC	1	0.783501	0.886486	0.328297	0.238105	0.776796	0.918372	0.86741	0.507139	0.343247	0	0.350946	0.288335	0.641612	0.238283
L1M4b	mTEC	1	0.700995	0.697053	0.231016	0.260668	0.56796	0.723513	0.677522	0.47825	0.312806	0	0.237766	0.300631	0.578168	0.188575
L1MB2	mTEC	1	0.739178	0.729801	0.199533	0.233011	0.791504	0.868997	0.804407	0.448121	0.283972	0	0.17589	0.215076	0.627726	0.160859
MLT2F	mTEC	0.640313	0.326075	0.438735	0	0	0.310406	1	0.215777	0.317443	0.604195	0	0.563516	0.255218	0	0.207806
LTR27C	mTEC	0.57253	0.35023	0.0848276	0	1	0.348518	0.585195	0.616305	0.288654	0.281505	0	0	0.0603899	0	0.0539932
L1PA12	mTEC	1	0.889262	0.597358	0	0	0.777868	0.803018	0.659408	0.327774	0.246286	0	0.262978	0.184913	0.776268	0.121818
LTR41	mTEC	0.75632	0.421504	0.587695	1	0	0.556348	0.874963	0.557893	0.281964	0.227589	0	0	0.292286	0.347757	0.107598
HERVK.int	mTEC	1	0.713706	0.990514	0	0.146341	0.532477	0.646719	0.345208	0.420861	0.375779	0	0	0.266207	0.538681	0.374637
L1MD3	mTEC	1	0.766408	0.72222	0.190502	0.298255	0.605989	0.696751	0.738874	0.346111	0.231031	0	0.331065	0.178626	0.513147	0.173771
ERV3.16A3_I.int	mTEC	0.673549	0.439815	1	0	0.463101	0.406374	0.787391	0.613929	0.419693	0.521186	0	0	0.28853	0.27182	0.203951
L1PA5	mTEC	1	0.783809	0.807691	0.171389	0.216296	0.875912	0.929587	0.889696	0.385322	0.342355	0	0.186118	0.271798	0.750394	0.242256
L1MA7	mTEC	1	0.691827	0.985026	0.246724	0.0503559	0.608105	0.83086	0.820896	0.378296	0.264756	0	0.217489	0.196386	0.734788	0.161706
MIR1_Amn	mTEC	1	0.850061	0.739273	0.258035	0.176974	0.579454	0.919796	0.785302	0.395127	0.438468	0	0.147511	0.215551	0.64302	0.163227
MER61.int	mTEC	0.625377	0.583753	0.553661	0	0.255974	0.60037	1	0.615384	0.139726	0.156735	0	0.397803	0.101625	0.230594	0.11514
LTR86B2	mTEC	0.406495	0.317174	0.319912	0	0	0	0.574073	1	0.169539	0.0566517	0	0	0.0418997	0.423032	0.0142315
L1MA6	mTEC	1	0.77284	0.556946	0	0.214654	0.709419	0.834599	0.623319	0.413325	0.257998	0	0.270914	0.226711	0.528212	0.197367
LTR1E	mTEC	0.681735	0	0.81539	0	0	0	0	1	0.342026	0.444769	0	0	0.187987	0	0
L1PB2	mTEC	1	0.900242	0.885753	0	0.102169	0.701778	0.875108	0.757494	0.261251	0.189864	0	0.311105	0.160027	0.756786	0.134259
MER4A1_	mTEC	1	0.617041	0.3686	0	0	0	0	0.845144	0.206785	0.322165	0	0	0.15821	0.816626	0.125493
MLT1J2	mTEC	1	0.847997	0.709588	0	0.208261	0.603683	0.459938	0.704719	0.318384	0.485778	0	0.205011	0.225191	0.674779	0.187258
L1MCb	mTEC	1	0.65168	0.820504	0	0.259287	0.896773	0.391683	0.710309	0.278591	0.253512	0	0.629857	0.256222	0.318333	0.0657569
LTR3A	mTEC	0.442699	0.480589	0.290818	0	1	0	0.20823	0.114345	0.1004	0.147555	0	0	0.20071	0	0.124395
LTR45	mTEC	0.237533	1	0.183745	0	0	0	0	0.506591	0.122587	0.0966259	0	0	0.0842648	0	0.107661
LTR40c	mTEC	0.729116	0.593291	0.331946	0	0	0.309297	1	0.285805	0.456968	0.199458	0	0	0.110795	0	0.114304
LTR8	mTEC	1	0.917787	0.691385	0.382647	0.366885	0.475357	0.510245	0.5783	0.713933	0.724164	0.805894	0.218747	0.314542	0.369119	0.292237
LTR18A	mTEC	0.309909	0.612132	0	0	0	0	0	0	0.436044	0.479823	0	0	0.177427	1	0
L1MEb	mTEC	0.664231	0.480378	0.540781	0	0.240557	0.224427	1	0.51281	0.188793	0.130427	0	0.184821	0.0763423	0.395205	0.0587982
LTR1B1	mTEC	0.519046	0	0	0	0	0	0	0	0.457815	1	0	0	0.454093	0	0
L1PB4	mTEC	1	0.685426	0.687232	0	0.0515273	0.538556	0.805204	0.669553	0.362626	0.269984	0	0	0.209672	0.646182	0.205572
L1ME3A	mTEC	1	0.738065	0.818491	0.269796	0.134197	0.903824	0.751211	0.82548	0.45637	0.303166	0	0.198132	0.2272	0.587142	0.162973
LTR50	mTEC	0.404395	0.266234	0.163116	1	0	0.218031	0.286513	0.255385	0.148388	0.224923	0	0.193174	0.0856075	0.209015	0.0812771
LTR1B0	mTEC	0.189772	0	0	0	0	0	0	1	0	0.151605	0	0	0.04977	0	0.164089
MER52.int	mTEC	0.889222	0.416557	0	0	0	0	0	1	0.675623	0.89157	0	0	0.634079	0	0.590784
MER70C	mTEC	1	0	0	0	0	0	0	0	0.936615	0.629351	0	0	0.561132	0	0
L1MA8	mTEC	1	0.748887	0.696103	0.140938	0.310701	0.682218	0.774912	0.799513	0.455723	0.31173	0	0.145056	0.240425	0.51987	0.208354
L1PA15	mTEC	1	0.716975	0.841039	0	0.475327	0.762911	0.942433	0.812521	0.390474	0.291697	0	0.147756	0.288375	0.689328	0.189987
L1MC	mTEC	1	0.707313	0.69268	0.309428	0.148461	0.688526	0.91423	0.681958	0.374084	0.277927	0	0.110533	0.173071	0.493357	0.216072
L1PA16	mTEC	1	0.686976	0.696372	0.113811	0.190723	0.752317	0.898615	0.729595	0.482335	0.3288	0	0.330939	0.299156	0.650862	0.254322
MLT1E2	mTEC	0.959643	1	0.532111	0	0.136987	0.589713	0.96949	0.785013	0.27621	0.351941	0	0.592952	0.236942	0.339604	0.168893
MamGypLTR1b	mTEC	0.47458	0.572544	0.857873	0	0	1	0.478868	0.543533	0.178547	0.146833	0	0	0.121156	0.107763	0.0378288
LTR85a	mTEC	0.759145	0.447977	1	0	0	0	0.587792	0.386944	0.379785	0.268907	0	0	0.244155	0.248331	0.139016
HERVH.int	mTEC	1	0.703834	0.877057	0	0.175528	0.728458	0.682701	0.791149	0.405405	0.565365	0	0.566293	0.623966	0.795053	0.311146
LTR33B	mTEC	0.620576	0.15846	0.726049	0	0	0	1	0.290534	0.265827	0.265742	0	0.935918	0.202218	0	0.072669
LTR9D	mTEC	0.728483	0.852046	1	0	0	0.675891	0.500823	0.748155	0.31244	0.559266	0	0	0.23209	0.147797	0.126324
LTR14B	mTEC	1	0.610981	0.415461	0	0	0	0.42529	0.291161	0.367657	0.375463	0	0	0.119687	0.554382	0.109495
MER51A	mTEC	0.480603	0.321753	0.283642	0	0.374368	0.301361	1	0.553549	0.212685	0.231021	0	0.498822	0.0921674	0.415358	0.041767
MLT2A1	mTEC	1	0.91417	0.872972	0	0.911966	0.89683	0.735033	0.2702	0.400139	0.879592	0	0	0.434529	0.954619	0.0885411
LTR104_Mam	mTEC	0.567192	0.1896	0.433781	0	0.724669	0.531823	0.299579	1	0.324101	0.346631	0	0	0.219708	0.20767	0.258762
MER52C	mTEC	0.130893	0.0371265	0.0364433	0	0	0.142223	0.140232	0.0824644	0.152461	0.308017	1	0	0.113908	0	0.0787073
HERVL40.int	mTEC	0.73215	1	0.916085	0	0.271879	0.364037	0.137564	0.239921	0.196153	0.155821	0	0	0.261962	0.538009	0.1183
L1MCc	mTEC	0.836334	0.482554	0.543073	0	0.0968224	0.542757	1	0.575343	0.280759	0.177404	0	0	0.159863	0.33769	0.100391
L4_B_Mam	mTEC	0.875296	0.677252	0.641314	0.509313	0.24589	0.666957	1	0.756372	0.285152	0.207631	0	0.925419	0.210605	0.7764	0.120316
LOR1.int	mTEC	0.946836	0.555606	0.453827	0	0	0.572161	0.972252	0.670538	0.325455	0.408064	0	0.405252	0.242543	1	0.115314
MLT2B5	mTEC	0.401319	0.259711	0.19782	0	0	0	0	1	0.165918	0.530498	0	0	0.143275	0.419615	0
MER39B	mTEC	0.880987	0.330459	1	0.528724	0	0.187872	0.899357	0.193724	0.430118	0.236059	0	0	0.0886071	0.0927623	0.0872751
MER65.int	mTEC	0.789171	0.724493	0.358826	0	0.490434	0.587499	0.956958	1	0.312672	0.398596	0	0	0.236123	0.364397	0.186997
MER31A	mTEC	1	0.397492	0.467141	0.953992	0.975099	0.682421	0.161608	0.387958	0.36388	0.378135	0	0	0.150548	0.459779	0.0761326
MLT1N2	mTEC	0.820947	0.702478	0.615939	0	0.0987877	0.717191	0.746961	1	0.264429	0.398501	0	0.294599	0.239847	0.503099	0.182928
LTR10C	mTEC	0.558121	0.683485	0.273826	1	0.323437	0.164683	0.566261	0.168113	0.150629	0.16971	0	0	0.236912	0	0.0448152
L1M7	mTEC	1	0.729981	0.911469	0	0	0.749939	0.840562	0.961263	0.310466	0.231711	0	0.178403	0.169099	0.495326	0.0823604
LTR89	mTEC	0.240379	0.107489	0.0861845	0	0	0.0930394	0.0984841	0.0321304	0.0324252	0.040464	0	1	0.0437265	0.111503	0.0129938
MSTB1.int	mTEC	0.410511	0	0.30106	0	1	0	0.351098	0	0.281556	0.0790843	0	0	0.0684565	0	0
MER41B	mTEC	1	0.807185	0.556704	0.932286	0.377698	0.734298	0.486384	0.626918	0.374085	0.39821	0	0	0.324161	0.832404	0.206519
Plat_L3	mTEC	0.963864	0.807702	0.813294	0.619677	0	1	0.670462	0.685334	0.382362	0.298055	0	0	0.175051	0.465762	0.0858589
MLT1A	mTEC	1	0.621301	0.761106	0.297024	0.365065	0.651156	0.738231	0.950545	0.376846	0.445554	0	0.305701	0.296188	0.511231	0.162751
Alu	mTEC	0.856097	0.84064	0.843614	1	0	0.338119	0.514196	0.861927	0.188703	0.183169	0	0	0.12634	0.880451	0.188857
MLT1E1A.int	mTEC	0.0576148	1	0.334858	0	0	0	0	0	0	0.111185	0	0	0	0	0.123915
LTR16C	mTEC	1	0.846551	0.662359	0	0.382267	0.467489	0.510842	0.8078	0.367627	0.414532	0	0	0.259033	0.775285	0.149245
MamRep1527	mTEC	0.680996	0.764056	0.640661	0	0	0.364527	0	1	0.238175	0.301978	0	0	0.195698	0.297102	0.0362169
LTR12F	mTEC	0.378358	0.245232	0.251239	0	0.245847	0.894911	0.333625	0.453198	0.261271	0.570009	0	0.431233	0.233181	1	0.0837822
AluYj4	mTEC	1	0.803925	0.737646	0.188575	0.0873644	0.672325	0.618083	0.403211	0.0941519	0.112278	0	0.327716	0.0503216	0.484169	0.0886635
FLAM_A	mTEC	0.952584	0.727187	0.859203	0.334213	0.199351	1	0.765805	0.786739	0.341861	0.275001	0	0.219861	0.170307	0.589811	0.116413
L1PB	mTEC	0.88016	0.492937	0.859787	0	0.159269	1	0.248342	0.6179	0.282885	0.205561	0	0	0.121958	0.463276	0.0842325
AluSc5	mTEC	1	0.7643	0.813175	0.504431	0.11769	0.661037	0.6137	0.682979	0.212279	0.16606	0	0.290454	0.0829744	0.574667	0.0913739
HAL1M8	mTEC	0.907958	0.838184	1	0	0.231178	0.599006	0.885227	0.622284	0.372265	0.284021	0	0.167458	0.229621	0.67294	0.128474
LTR103b_Mam	mTEC	0.762582	1	0.574713	0	0	0.871184	0.516303	0.82166	0.294031	0.136882	0	0	0.103584	0	0.103484
MLT1H2	mTEC	0.359758	0.294952	0.263531	0	0.16717	0.0871075	0.346287	0.203408	0.1602	0.238391	1	0.124579	0.121868	0.308228	0.127968
MER4D1	mTEC	1	0.631055	0.542075	0	0	0.32165	0.624899	0.633395	0.360693	0.194172	0	0	0.24333	0.288113	0.162239
MER4CL34	mTEC	0.78961	1	0.271481	0	0	0.582018	0.646113	0.122181	0.160488	0.171839	0	0	0.11133	0.686256	0.0511004
L5	mTEC	1	0.533136	0.426385	0	0	0.288102	0.640991	0.564094	0.092637	0.252401	0	0	0.136362	0.252201	0
MLT1H	mTEC	0.841712	0.700097	0.724167	1	0.217846	0.624096	0.470974	0.430234	0.530712	0.528345	0	0.471792	0.33984	0.39612	0.164905
FAM	mTEC	1	0.732001	0.865086	0.335357	0.346577	0.914025	0.573617	0.723877	0.221958	0.159737	0	0.29562	0.128332	0.525721	0.115601
MER65D	mTEC	0.603334	0.331919	0.557561	0	0	0.688987	1	0.516854	0.322697	0.262295	0	0	0.0922161	0	0.167133
LTR37A	mTEC	1	0.220732	0.359199	0	0.354201	0.455425	0.532407	0.638378	0.353458	0.261717	0	0	0.228038	0.932284	0.13237
AluYh3	mTEC	1	0.733455	0.630548	0.328645	0	0.638205	0.500572	0.567596	0.0713471	0.0838176	0	0.211359	0.0316097	0.535947	0.0379654
MER31.int	mTEC	1	0.627318	0.465449	0	0.479833	0.731762	0.7957	0.837935	0.294693	0.351708	0	0	0.321395	0.502094	0.203985
MER92.int	mTEC	0.719324	0.458509	0.533545	0	0	1	0.632048	0.685891	0.203705	0.155558	0	0	0.125676	0	0.112035
MER34A	mTEC	0.932877	0.48922	1	0	0	0.689097	0.480111	0.81468	0.488632	0.404842	0	0.644757	0.265441	0.523549	0.151617
MSTA1	mTEC	0.374845	0.165698	0.101214	0	0	0.604869	0.207561	1	0.231603	0.215331	0	0	0.102063	0.179457	0.101421
MER4A1	mTEC	1	0.791324	0.382941	0	0	0.437519	0.149387	0.526656	0.254287	0.346142	0	0	0.23122	0.218101	0.0945357
AluYc	mTEC	1	0.844057	0.639092	0.309922	0.13033	0.909169	0.649784	0.737324	0.127192	0.112169	0	0.157076	0.0286304	0.450286	0.0589587
AluYf1	mTEC	1	0.755284	0.715178	0.410693	0.133937	0.870666	0.592412	0.682358	0.118292	0.0799294	0	0.285301	0.0363451	0.48889	0.0338841
L1MC4a	mTEC	1	0.728947	0.790386	0.323562	0.184413	0.758772	0.919079	0.749833	0.443554	0.300804	0	0.192884	0.249695	0.675889	0.18936
LTR9B	mTEC	1	0.64415	0.739764	0	0	0.877732	0.668794	0.242253	0.234224	0.23931	0	0	0.131023	0.192498	0.0741861
MER4E1	mTEC	1	0.861917	0.742391	0	0.184152	0.307587	0.143041	0.324734	0.206781	0.176855	0	0.412813	0.178544	0.717445	0.139989
MLT1E3	mTEC	1	0.364661	0.746594	0	0	0.215035	0.599375	0.259712	0.373998	0.444587	0	0	0.198748	0.157406	0.165246
LTR37B	mTEC	0.859709	0.447604	1	0.796482	0	0.48608	0.800938	0.738241	0.28459	0.194588	0	0	0.199479	0.450778	0.0516414
LTR39	mTEC	0.398426	0.223505	0.654987	0	0.302079	0.854427	1	0.413386	0.161747	0.104719	0	0	0.109826	0.273948	0.0231256
L1ME3D	mTEC	0.926723	0.796328	0.647146	0.218793	0.177437	0.876486	1	0.685061	0.233574	0.20556	0.460801	0	0.144057	0.582783	0.10172
L1P4	mTEC	0.90693	0.787378	0.611861	0	0	0.606693	1	0.903024	0.255279	0.215441	0	0	0.213714	0.711159	0.130517
LTR22C2	mTEC	0	0	0	0	0	0	0	0	1	0	0	0	0.399829	0	0.399369
L1PA10	mTEC	1	0.756165	0.734001	0.223709	0.120996	0.74961	0.733689	0.722492	0.277631	0.233982	0	0.251049	0.187388	0.529083	0.169444
ERVL.int	mTEC	0.399267	0.120383	0.165499	0	0	0.183906	1	0.232629	0.238609	0.207564	0	0	0.125656	0.26425	0
MLT1H1.int	mTEC	0.243449	0	0.220744	0	1	0	0	0	0.121024	0.110866	0	0	0.094539	0.786824	0.0369866
LTR64	mTEC	0.419365	1	0.174004	0	0	0.472238	0	0	0.345039	0.133046	0	0	0.0544478	0	0.137338
MLT1F1	mTEC	0.811883	0.76024	0.501935	0	0.0772136	0.579244	0.316939	0.333619	0.303889	0.342755	1	0.230262	0.232812	0.613844	0.121377
FRAM	mTEC	0.977499	0.627307	0.75085	0.15228	0.173126	1	0.733999	0.693899	0.248814	0.185051	0	0.264642	0.146623	0.561583	0.0894585
MER67C	mTEC	0.654128	0.485619	0.302463	0	0	0.24518	0.303813	1	0.171933	0.155689	0	0	0.0500214	0.0843069	0.0617559
LTR67B	mTEC	0.762341	0.676672	0.380804	0	0.264391	0.394557	1	0.464717	0.356824	0.338128	0	0.463761	0.257839	0.609272	0.0853394
LTR79	mTEC	0.908057	0.679549	0.758577	0	0	0.730286	1	0.382881	0.350244	0.38764	0	0.389834	0.189878	0.661141	0.0462946
L1M8	mTEC	0.783128	0.643726	1	0	0.106996	0.598081	0.82862	0.583925	0.22361	0.200275	0	0	0.158374	0.429269	0.0626639
MER41D	mTEC	0.455439	0.368098	0.323215	0	0	0	0	0.0865694	0.169438	0.23256	0	0	0.119703	1	0.0869721
MLT1A1	mTEC	1	0.572115	0.68079	0.341151	0.55567	0.287535	0.472838	0.570569	0.463288	0.562057	0.846972	0.351117	0.273095	0.638589	0.129543
LTR78	mTEC	0.779324	0.57682	0.762364	0.402789	0.348718	0.429502	0.568538	0.601056	0.547806	0.450403	1	0.230262	0.189268	0.0831004	0.202494
LTR2C	mTEC	0.369515	0.46006	0.472188	0	0	0.0682992	0.0515404	0.273134	0.120207	0.105926	1	0	0.0294101	0.160504	0.0224453
LTR57.int	mTEC	0.12302	0.14354	0.0615	0	0	0	1	0	0.0320148	0.0873268	0	0	0.0397353	0	0
HERVK9.int	mTEC	0.957267	0.429901	0.485312	0	0.47146	0.648076	0.281603	0.541315	0.304299	0.714645	0	0.942561	1	0.206532	0.336624
MER9a2	mTEC	1	0.913495	0.667668	0	0	0	0.370026	0.523967	0.317382	0.222424	0	0	0.14909	0	0.103764
MER67A	mTEC	0.390894	0.597781	0.069818	0	0	0.190757	0	0.111119	0.0959808	0.0667536	0	1	0.0797561	0.18289	0.0721421
HERV16.int	mTEC	0.823045	0	0	0	0	0	1	0.766757	0.49878	0.769001	0	0	0.489382	0	0.209179
MLT1G1	mTEC	1	0.858844	0.504318	0	0	0.35994	0.626323	0.451412	0.339269	0.41592	0	0.369387	0.114656	0.538091	0.104744
L1MD	mTEC	0.923388	0.764394	0.850624	0.401881	0.194563	0.749425	1	0.840973	0.336897	0.244853	0	0.282952	0.199166	0.553517	0.151706
LTR13A	mTEC	0.712278	0.556814	0.231498	0	0.55309	1	0.344626	0.476496	0.403141	0.3577	0	0	0.390053	0.0995427	0.0569229
MER49	mTEC	1	0.878041	0.712247	0	0	0.19805	0.731388	0.747812	0.433046	0.501532	0	0	0.362474	0.116842	0.077492
MER50	mTEC	0.903973	0.62111	0.674721	0	0.316658	0.483627	0.585628	0.667498	0.529073	0.351972	0	1	0.260875	0.98196	0.229728
LTR46	mTEC	0.833892	0.375116	0.104894	0	0	0	1	0	0.139982	0.384638	0	0	0.251646	0.466961	0.0442102
MER9a1	mTEC	0.712612	0.76365	0.4273	0	0	0	0.849954	0	0.279494	0.167458	0	0	0.11019	1	0.180311
LTR13	mTEC	0.773033	0.716905	0.516917	0	0	0.387091	0.145214	0.325227	0.377751	0.409769	0	1	0.329952	0.128199	0.22064
LTR13_	mTEC	0.435548	1	0.0760624	0	0	0.641206	0.178487	0.0797959	0.116685	0.112588	0	0	0.0605751	0.141324	0
MER54A	mTEC	0.672809	0.42326	0.329552	0	0.770567	0.235993	0.201407	0.383458	0.24349	0.280445	0	0	0.0668513	1	0.135014
MER68	mTEC	1	0.654863	0.628042	0	0	0.83866	0.816902	0.739902	0.306615	0.286644	0	0	0.17838	0.379452	0.0533404
L3b	mTEC	1	0.738003	0.719092	0.22807	0.386221	0.903672	0.55004	0.682017	0.32245	0.304515	0	0.13038	0.15077	0.662367	0.0967706
MER4B.int	mTEC	1	0.482671	0.462297	0.567545	0	0.492987	0.38309	0.640898	0.131312	0.164055	0	0.324448	0.12031	0.484698	0.0523293
AluYe5	mTEC	1	0.694206	0.585151	0	0	0.682998	0.689306	0.717711	0.112238	0.0861907	0	0.150193	0.030784	0.389801	0.023473
AluSq4	mTEC	1	0.699882	0.633102	0.405991	0.0882067	0.480562	0.55778	0.512846	0.135714	0.128351	0	0.282035	0.042279	0.447396	0.04689
MER66C	mTEC	0.347971	0.334856	0.369976	0	0	0.189653	0.189882	0.478804	0.153741	0.198151	0	1	0.120966	0.852629	0.0501363
AluYk11	mTEC	0.693321	0.640915	1	0	0	0.277781	0.296356	0.765314	0.106348	0.247528	0	0	0.0397524	0.674651	0.0620802
AluYh9	mTEC	1	0	0	0	0	0	0	0	0.134898	0.181687	0	0	0	0	0
MER74B	mTEC	0.851044	0.521436	0.736577	0	0.395586	1	0.466064	0.290125	0.218947	0.208029	0	0	0.129553	0.576934	0.175875
LTR2B	mTEC	0.388842	0.391577	0.274192	0	0.567673	1	0.194444	0.743043	0.220356	0.142547	0	0	0.155643	0.480433	0.072144
Harlequin.int	mTEC	0.842764	0.588905	0.69622	0.495409	0.107634	0.505771	1	0.732217	0.495379	0.299625	0	0.139463	0.320124	0.383848	0.116578
LTR75	mTEC	0.252402	0.207486	0.11207	0.762229	1	0.102994	0.0682466	0.114981	0.0290406	0.0336621	0	0	0.0138755	0	0.0136022
AluYa8	mTEC	0.141985	0.0767454	0.11201	0	0	0.225644	1	0.201479	0.00939992	0.0546325	0	0.293738	0.00368868	0.142435	0.104141
LTR10A	mTEC	0.617749	0.521049	0.227238	1	0	0.102478	0	0.100668	0.114675	0.153473	0	0	0.134001	0.714491	0.0408805
HERV9N.int	mTEC	0.352947	0.122921	0.242513	0	0.553709	0.321265	0	1	0.27053	0.142647	0	0.971247	0.14564	0.311068	0.0484402
AluYh3a3	mTEC	0.619505	0.402309	0.542814	0	0	1	0.331359	0.333707	0.0421009	0.0621545	0	0.432838	0.00359053	0.326996	0.08791
LTR7B	mTEC	0.870485	0.753427	0.652086	0.438808	0.111903	0.48082	0.38675	0.621878	0.123463	0.212252	0	1	0.155913	0.592635	0.0552691
AluYk3	mTEC	1	0.778501	0.564805	0	0.149058	0.529947	0.435393	0.665031	0.0596175	0.0907325	0	0	0.0296784	0.318721	0.0324205
MER52A	mTEC	1	0.919314	0.255797	0	0.83735	0.242842	0.358922	0.226971	0.391557	0.834449	0	0.4659	0.310596	0.276278	0.506677
MER83	mTEC	0.826114	0.227548	0.60584	0	0	0.302797	0.728798	1	0.221949	0.326163	0	0	0.225412	0	0.102024
LTR26B	mTEC	0.328975	0.756137	0.41757	0	0	0.975426	1	0.239293	0.121898	0.0164303	0	0	0.0109676	0	0
LTR42	mTEC	0.70307	0.218329	0.12402	0	0	1	0	0.414396	0.22503	0.194801	0	0	0.104547	0.389505	0.0291545
MER4D	mTEC	0.99701	0.752787	1	0	0.382156	0.388988	0.263672	0.852671	0.218632	0.210678	0	0	0.168374	0.523302	0.119078
L1M4a2	mTEC	1	0.690212	0.851942	0	0.183774	0.307256	0.698545	0.675539	0.30415	0.199062	0	0	0.1687	0.74052	0.137986
MER65B	mTEC	0.342383	0.439392	0	0	0	0	0	0.380513	0.227788	0.150165	0	0	0.209304	1	0
AluYi6	mTEC	0.786483	0.510054	0.212394	0	1	0.225663	0.663937	0.2237	0.0753068	0.129492	0	0	0.00911157	0.48076	0.0239247
AluYk2	mTEC	1	0.626572	0.47639	0.435539	0	0.274653	0.428475	0.475447	0.0904644	0.0449572	0	0	0.0158263	0.195629	0.022396
L1M4a1	mTEC	1	0.726173	0.658646	0	0.2333	0.578502	0.709863	0.66439	0.288622	0.255692	0	0.250432	0.167941	0.860011	0.138682
X7A_LINE	mTEC	0.851403	0.762288	0.230608	0	0	1	0.531938	0.264638	0.418487	0.323541	0	0	0.195987	0.451012	0.0752642
LTR16E1	mTEC	0.43832	0.487302	0.234278	0	0.174091	0.441132	0.555669	0.659672	0.174636	0.233656	0	0	0.196833	1	0.0203075
ERV3.16A3_LTR	mTEC	0.0907426	0.0225178	0.0596271	0	0.0692979	0.0901792	0	0.0164533	0.040028	0.0675396	0	1	0.0596213	0.130495	0.0189425
MSTB	mTEC	1	0.823622	0.542781	0	0	0.438198	0.647671	0.629652	0.39464	0.377347	0	0.996065	0.265707	0.367421	0.146286
LTR18B	mTEC	0.374738	0.385227	0.361275	0	0	0.675862	0.321375	0	0.241844	0.309267	0	0	0.129676	1	0.0766486
LTR81	mTEC	0.306536	0	1	0	0	0	0	0	0.395156	0.960855	0	0	0.0673011	0	0.244435
MER74A	mTEC	1	0.667009	0.734735	0	0.275421	0.318484	0.663351	0.914594	0.222272	0.224076	0	0.483108	0.19119	0.255115	0.118691
LTR52	mTEC	0.885649	1	0.865185	0	0	0.375698	0.556885	0.846287	0.27587	0.118299	0	0	0.266677	0.477899	0.0340414
MLT.int	mTEC	0.12097	0.0514093	0.0758063	0	0	0.258828	0	0.174403	0.0797671	0.0293187	0	1	0.00835411	0	0
AmnSINE2	mTEC	0.466768	0.169737	0.549239	0	1	0.188112	0	0.133953	0.110662	0.137102	0	0.79586	0.0710888	0	0.02405
MamRTE1	mTEC	1	0.696673	0.74411	0	0.203575	0.718741	0.629284	0.827535	0.309881	0.255131	0	0	0.16193	0.675152	0.136431
LTR81C	mTEC	0.971139	0.390381	0.176702	0	0	1	0	0	0.157936	0.585342	0	0	0.0672903	0.410438	0.153662
LTR41C	mTEC	1	0.921663	0.47961	0	0.650409	0	0.374605	0.375321	0.328511	0.467423	0	0.842744	0.269832	0.224408	0.0774588
MER34C_	mTEC	0.569256	0.461971	0.389011	0	0	1	0	0.336676	0.353655	0.27261	0	0	0.121867	0	0
MER34	mTEC	0.362881	0.2167	0.136274	0	0	0.0685788	0	0.241643	0.114341	0.0772608	1	0	0.108015	0.0981375	0.0225026
LTR19A	mTEC	0.56701	0.90388	0.894045	0	0.773543	0.587245	1	0.294465	0.391033	0.270342	0	0	0.186227	0	0.0810157
MER89	mTEC	0.452201	0.231713	0.316562	0	0.570102	0.252653	0.319053	0.306907	0.325803	0.341621	0	1	0.18641	0.231446	0.12831
AmnSINE1	mTEC	0.928137	0.603383	0.712489	0.832517	0.690575	0.967622	1	0.897621	0.232791	0.299192	0	0	0.158444	0.385244	0.248911
LTR27B	mTEC	0.353577	0.480978	0	0	0	0	0	1	0.233713	0.113316	0	0	0.17012	0	0.187751
LTR106_Mam	mTEC	0.578979	1	0.226709	0	0.677563	0.924929	0.477078	0.579534	0.119366	0.152519	0	0	0.117267	0	0.0590489
MLT1H.int	mTEC	0.954127	0	1	0	0	0.63059	0	0.796306	0.490976	0.320314	0	0	0.383597	0.356545	0.15032
MLT2B4	mTEC	1	0.660544	0.477552	0	0.297876	0.425574	0.617455	0.995241	0.564897	0.422564	0	0.694873	0.387382	0.411853	0.243217
LTR40b	mTEC	1	0.896726	0.306992	0	0	0.197294	0.409228	0.243026	0.395684	0.325337	0	0	0.264669	0.558751	0.0696585
AluYg6	mTEC	0.928034	0.841994	0.442263	0	0.147538	1	0.490533	0.779224	0.0378591	0.0424364	0	0	0.0126808	0.57482	0.0233744
L1ME3Cz	mTEC	1	0.725301	0.788738	0.201842	0.225488	0.641419	0.866879	0.805433	0.390507	0.289795	0	0.665238	0.243983	0.665146	0.19938
L1MA10	mTEC	1	0.808089	0.880929	0	0.127487	0.865228	0.749734	0.600638	0.241467	0.228428	0	0.223621	0.213117	0.803351	0.15979
L1MC2	mTEC	1	0.609553	0.708722	0	0.105901	0.684971	0.733486	0.829258	0.320057	0.203398	0	0.141071	0.164024	0.412365	0.101
L1MEh	mTEC	1	0.611552	0.972963	0	0	0.825645	0.885127	0.912978	0.305232	0.257593	0	0	0.15974	0.518125	0.137324
LTR10B2	mTEC	0.775411	1	0.16522	0	0	0.444795	0	0.350952	0.0178579	0.0958083	0	0	0.0659853	0	0
LTR21C	mTEC	0	0	0	0	0	0	0	0	1	0	0	0	0	0	0
LTR62	mTEC	0.700284	0.265252	0.110871	0	0	0.310002	0.786503	0.414335	0.334973	0.229248	0	1	0.354383	0.44857	0.204603
MER34C2	mTEC	0.700924	1	0.380646	0	0.449177	0.432448	0.13368	0.291924	0.186031	0.147235	0	0	0.147124	0.174257	0.156507
LTR5B	mTEC	1	0.922894	0.772754	0	0	0.368515	0.302741	0.514513	0.316502	0.284492	0	0.927828	0.253276	0.439884	0.0717251
LTR45C	mTEC	1	0	0.500715	0	0.513344	0.421338	0.30881	0.124089	0.257625	0.484699	0	0	0.2083	0.490301	0
LTR8A	mTEC	1	0.653036	0.611637	0	0	0.890966	0.334424	0.476416	0.432665	0.409971	0	0	0.261586	0.671553	0.234893
LTR38	mTEC	0.835332	0.299431	1	0	0	0	0	0	0.254516	0.330742	0	0	0.0665751	0	0
LTR38.int	mTEC	0.273535	0	0.48905	0	0	1	0	0.403607	0.0317099	0.988109	0	0	0.0978268	0	0.393211
HERVK13.int	mTEC	0.190299	0.280019	0.764909	1	0	0.135122	0	0	0.375187	0.1491	0	0	0.132099	0.206313	0.0878173
LTR3B_	mTEC	0.549377	0.378767	0	0	0	1	0.637846	0.668053	0.189256	0.24986	0	0	0.445863	0	0.0573293
L1MEi	mTEC	1	0.70442	0.907082	0	0.339116	0.668569	0.965664	0.799176	0.383295	0.280191	0	0.115775	0.200352	0.61638	0.137901
MER77	mTEC	1	0.749613	0.683701	0	0	0.701696	0.431082	0.389284	0.320862	0.480641	0	0.636467	0.298773	0.116403	0.163509
MER77B	mTEC	1	0.943074	0.83625	0	0	0.894519	0.801907	0.731345	0.454913	0.400026	0	0	0.298799	0.977039	0.223633
LTR33C	mTEC	0.842597	0.587527	0.110429	0	0	0	0.41387	0.25318	0.672998	1	0	0	0.663098	0.788045	0.197623
LTR85c	mTEC	0.984987	0.527597	1	0	0	0.391594	0.58633	0.351799	0.125504	0.309243	0	0	0.166616	0.319869	0.139389
LTR105_Mam	mTEC	0.360262	0	0.154011	0	0	0	0	1	0.11843	0.200725	0	0	0.22359	0	0.042063
MLT2B2	mTEC	1	0.901728	0.606058	0	0	0.726662	0.898694	0.756274	0.259055	0.480082	0	0	0.285222	0.388095	0.200762
MER92B	mTEC	0.688942	0.280184	0.448925	0	0	1	0.336993	0.402306	0.222777	0.176416	0	0	0.0849633	0.319921	0.0859536
LTR10E	mTEC	0.937965	0.52038	0.721218	0	0	0.330873	0	1	0.410296	0.342244	0	0	0.358086	0.222998	0.0759507
LTR16E2	mTEC	0.495767	0.736939	0.397267	0	0	0.763414	0.383175	0.548446	0.229041	0.254492	0	1	0.156133	0.0988717	0.053738
L1ME5	mTEC	0.62367	0.425678	0.486066	0	0.155219	0.380722	0.364682	0.581943	0.193014	0.269135	0	1	0.106522	0.490088	0.149203
HAL1b	mTEC	0.833896	0.537596	0.627702	0	0.38401	0.532653	1	0.59119	0.283155	0.221076	0	0.320099	0.139682	0.581879	0.0707609
MER21B	mTEC	1	0.587174	0.486524	0	0.202668	0.855131	0.49048	0.600503	0.337563	0.283032	0	0.492154	0.229487	0.33728	0.110423
LTR24C	mTEC	1	0.766899	0.780974	0	0	0.352694	0.708912	0.546504	0.284142	0.245885	0	0	0.180952	0	0.0621401
MSTC	mTEC	1	0.650743	0.681362	0	0.443674	0.391498	0.670957	0.466746	0.365957	0.320933	0	0	0.174976	0.676556	0.088227
[truncated: 12,028 more rows]

## Sheet: Supplementary file 1b
Supplementary file 1b. Correlation between TE expression and cell proliferation scores.
Cell type	TE subfamily	Class	Spearman correlation	adjusted p-value	Correlation status
Endothelial	Alu	SINE	-0.233652	9.96e-15	Negative
cTEC	Alu	SINE	-0.279744	1.09e-101	Negative
Th17	AluJb	SINE	-0.257394	1.51e-30	Negative
cTEC	AluJb	SINE	-0.417651	2.07e-236	Negative
DC	AluJb	SINE	-0.220513	4.19e-26	Negative
CD4 SP	AluJb	SINE	-0.291648	0	Negative
mTEC	AluJb	SINE	-0.372516	4.8e-62	Negative
Endothelial	AluJb	SINE	-0.327639	1.45e-27	Negative
CD8 SP	AluJb	SINE	-0.43654	0	Negative
VSMC	AluJb	SINE	-0.370757	7.31e-25	Negative
B_pro/pre	AluJb	SINE	-0.276195	0.0487157	Negative
Treg	AluJb	SINE	-0.468629	4.37e-41	Negative
B cell	AluJo	SINE	-0.215777	1.97e-14	Negative
NK	AluJo	SINE	-0.204888	1.11e-15	Negative
mTEC	AluJo	SINE	-0.353373	5.61e-56	Negative
Endothelial	AluJo	SINE	-0.332962	1.98e-28	Negative
cTEC	AluJo	SINE	-0.415176	1.93e-233	Negative
B_pro/pre	AluJo	SINE	-0.290197	0.0487157	Negative
Treg	AluJo	SINE	-0.464167	2.36e-40	Negative
Mono/Macro	AluJo	SINE	-0.217611	0.0124184	Negative
CD4 SP	AluJo	SINE	-0.296164	0	Negative
CD8 SP	AluJo	SINE	-0.434396	0	Negative
NKT	AluJo	SINE	-0.214501	4.27e-07	Negative
Th17	AluJo	SINE	-0.259275	6.72e-31	Negative
DC	AluJo	SINE	-0.237565	6.17e-30	Negative
DP	AluJo	SINE	-0.205043	8.94e-270	Negative
VSMC	AluJo	SINE	-0.380897	7.59e-26	Negative
CD4 SP	AluJr	SINE	-0.289656	0	Negative
Treg	AluJr	SINE	-0.458382	2e-39	Negative
Mono/Macro	AluJr	SINE	-0.226532	0.00900732	Negative
mTEC	AluJr	SINE	-0.367609	1.83e-60	Negative
NK	AluJr	SINE	-0.205053	1.07e-15	Negative
DC	AluJr	SINE	-0.22902	5.88e-28	Negative
Endothelial	AluJr	SINE	-0.336509	5.01e-29	Negative
VSMC	AluJr	SINE	-0.346806	8.24e-22	Negative
CD8 SP	AluJr	SINE	-0.432086	0	Negative
cTEC	AluJr	SINE	-0.418944	5.24e-238	Negative
Th17	AluJr	SINE	-0.245808	4.97e-28	Negative
Mono/Macro	AluJr4	SINE	-0.237096	0.00665396	Negative
Treg	AluJr4	SINE	-0.448214	1.46e-37	Negative
NK	AluJr4	SINE	-0.203885	1.48e-15	Negative
DC	AluJr4	SINE	-0.225572	2.97e-27	Negative
CD8 SP	AluJr4	SINE	-0.39724	0	Negative
NKT	AluJr4	SINE	-0.223916	1.47e-07	Negative
cTEC	AluJr4	SINE	-0.390457	2.13e-204	Negative
Endothelial	AluJr4	SINE	-0.297808	4.5e-23	Negative
VSMC	AluJr4	SINE	-0.369469	8.67e-25	Negative
Th17	AluJr4	SINE	-0.253937	8.6e-30	Negative
CD4 SP	AluJr4	SINE	-0.288429	0	Negative
mTEC	AluJr4	SINE	-0.332169	2.05e-49	Negative
CD4 SP	AluSc	SINE	-0.288584	0	Negative
NK	AluSc	SINE	-0.207681	4.98e-16	Negative
B cell	AluSc	SINE	-0.200191	1.14e-12	Negative
NKT	AluSc	SINE	-0.221593	1.84e-07	Negative
DC	AluSc	SINE	-0.215325	5.5e-25	Negative
Endothelial	AluSc	SINE	-0.327433	1.45e-27	Negative
CD8 SP	AluSc	SINE	-0.42956	0	Negative
Treg	AluSc	SINE	-0.461821	5.26e-40	Negative
Mono/Macro	AluSc	SINE	-0.223421	0.0100869	Negative
VSMC	AluSc	SINE	-0.362662	7.13e-24	Negative
cTEC	AluSc	SINE	-0.386769	2.82e-200	Negative
Th17	AluSc	SINE	-0.235102	8.12e-26	Negative
mTEC	AluSc	SINE	-0.316252	9.46e-45	Negative
CD8 SP	AluSc5	SINE	-0.415217	0	Negative
DC	AluSc5	SINE	-0.239585	2.43e-30	Negative
Treg	AluSc5	SINE	-0.446187	3.15e-37	Negative
mTEC	AluSc5	SINE	-0.276032	4.34e-34	Negative
B cell	AluSc5	SINE	-0.242199	1.96e-17	Negative
NKT	AluSc5	SINE	-0.266204	4.61e-10	Negative
cTEC	AluSc5	SINE	-0.339377	8.41e-152	Negative
NK	AluSc5	SINE	-0.210804	2.04e-16	Negative
CD4 SP	AluSc5	SINE	-0.297922	0	Negative
VSMC	AluSc5	SINE	-0.319952	1.21e-18	Negative
Endothelial	AluSc5	SINE	-0.289369	6.76e-22	Negative
Th17	AluSc5	SINE	-0.268929	5.96e-33	Negative
B cell	AluSc8	SINE	-0.220649	7.26e-15	Negative
CD4 SP	AluSc8	SINE	-0.295265	0	Negative
CD8 SP	AluSc8	SINE	-0.438109	0	Negative
Endothelial	AluSc8	SINE	-0.307025	1.98e-24	Negative
DC	AluSc8	SINE	-0.242039	7.01e-31	Negative
Th17	AluSc8	SINE	-0.22941	1.29e-24	Negative
DP	AluSc8	SINE	-0.200074	5.3e-257	Negative
cTEC	AluSc8	SINE	-0.368959	4.04e-181	Negative
Mono/Macro	AluSc8	SINE	-0.21004	0.0157308	Negative
mTEC	AluSc8	SINE	-0.312595	1.03e-43	Negative
B_pro/pre	AluSc8	SINE	-0.274792	0.0487157	Negative
VSMC	AluSc8	SINE	-0.374153	3.31e-25	Negative
Treg	AluSc8	SINE	-0.487188	2.23e-44	Negative
NKT	AluSc8	SINE	-0.243233	9.26e-09	Negative
NK	AluSc8	SINE	-0.201196	3.23e-15	Negative
cTEC	AluSg	SINE	-0.375123	1.23e-187	Negative
DC	AluSg	SINE	-0.214926	6.63e-25	Negative
Endothelial	AluSg	SINE	-0.314006	1.99e-25	Negative
mTEC	AluSg	SINE	-0.320362	6.34e-46	Negative
Treg	AluSg	SINE	-0.441606	2.11e-36	Negative
CD4 SP	AluSg	SINE	-0.285374	0	Negative
Mono/Macro	AluSg	SINE	-0.231852	0.00760775	Negative
CD8 SP	AluSg	SINE	-0.437192	0	Negative
VSMC	AluSg	SINE	-0.378054	1.22e-25	Negative
Th17	AluSg	SINE	-0.229097	1.48e-24	Negative
CD4 SP	AluSg4	SINE	-0.300674	0	Negative
B cell	AluSg4	SINE	-0.251964	1.06e-18	Negative
cTEC	AluSg4	SINE	-0.361347	2.82e-173	Negative
Endothelial	AluSg4	SINE	-0.296883	6.01e-23	Negative
mTEC	AluSg4	SINE	-0.288433	3.35e-37	Negative
Treg	AluSg4	SINE	-0.462866	3.55e-40	Negative
CD8 SP	AluSg4	SINE	-0.420592	0	Negative
VSMC	AluSg4	SINE	-0.334011	3.01e-20	Negative
NKT	AluSg4	SINE	-0.225243	1.41e-07	Negative
DC	AluSg4	SINE	-0.227895	9.41e-28	Negative
Th17	AluSg4	SINE	-0.240874	5.34e-27	Negative
Mono/Macro	AluSg4	SINE	-0.200464	0.0221995	Negative
Th17	AluSg7	SINE	-0.262104	2.2e-31	Negative
VSMC	AluSg7	SINE	-0.385594	2.19e-26	Negative
mTEC	AluSg7	SINE	-0.284855	2.73e-36	Negative
CD8 SP	AluSg7	SINE	-0.42665	0	Negative
B cell	AluSg7	SINE	-0.234846	1.34e-16	Negative
DC	AluSg7	SINE	-0.236085	1.32e-29	Negative
cTEC	AluSg7	SINE	-0.360353	2.88e-172	Negative
CD4 SP	AluSg7	SINE	-0.299796	0	Negative
Endothelial	AluSg7	SINE	-0.289959	5.8e-22	Negative
NKT	AluSg7	SINE	-0.220158	2.08e-07	Negative
Treg	AluSg7	SINE	-0.46074	7.94e-40	Negative
NKT	AluSp	SINE	-0.208886	8.46e-07	Negative
VSMC	AluSp	SINE	-0.385875	2.19e-26	Negative
B cell	AluSp	SINE	-0.205839	2.78e-13	Negative
mTEC	AluSp	SINE	-0.327648	4.64e-48	Negative
Th17	AluSp	SINE	-0.251627	2.76e-29	Negative
DP	AluSp	SINE	-0.204242	7.59e-268	Negative
Treg	AluSp	SINE	-0.474131	5.9e-42	Negative
DC	AluSp	SINE	-0.21557	4.89e-25	Negative
cTEC	AluSp	SINE	-0.377155	8.3e-190	Negative
CD8 SP	AluSp	SINE	-0.443921	0	Negative
CD4 SP	AluSp	SINE	-0.291882	0	Negative
Endothelial	AluSp	SINE	-0.351811	1.4e-31	Negative
Endothelial	AluSq	SINE	-0.303788	6.11e-24	Negative
B cell	AluSq	SINE	-0.20287	6.29e-13	Negative
DP	AluSq	SINE	-0.205147	7.04e-270	Negative
cTEC	AluSq	SINE	-0.363083	4.76e-175	Negative
CD8 SP	AluSq	SINE	-0.433098	0	Negative
VSMC	AluSq	SINE	-0.373418	3.31e-25	Negative
NKT	AluSq	SINE	-0.253882	2.54e-09	Negative
Treg	AluSq	SINE	-0.465407	1.49e-40	Negative
Mono/Macro	AluSq	SINE	-0.235283	0.00692743	Negative
CD4 SP	AluSq	SINE	-0.292175	0	Negative
mTEC	AluSq	SINE	-0.310962	2.9e-43	Negative
Th17	AluSq	SINE	-0.257904	1.22e-30	Negative
NK	AluSq	SINE	-0.204209	1.38e-15	Negative
DC	AluSq	SINE	-0.213	1.67e-24	Negative
VSMC	AluSq10	SINE	-0.241116	6.04e-11	Negative
Mono/Macro	AluSq10	SINE	-0.205352	0.0185189	Negative
NK	AluSq10	SINE	-0.202378	2.28e-15	Negative
Treg	AluSq10	SINE	-0.316051	2.12e-18	Negative
mTEC	AluSq10	SINE	-0.223392	1.51e-22	Negative
DC	AluSq10	SINE	-0.229964	3.52e-28	Negative
B cell	AluSq10	SINE	-0.208535	1.39e-13	Negative
CD8 SP	AluSq10	SINE	-0.309234	0	Negative
CD4 SP	AluSq10	SINE	-0.231117	0	Negative
Endothelial	AluSq10	SINE	-0.290302	5.23e-22	Negative
Th17	AluSq10	SINE	-0.215942	5.89e-22	Negative
cTEC	AluSq10	SINE	-0.303254	4.64e-120	Negative
NKT	AluSq2	SINE	-0.202977	1.88e-06	Negative
Treg	AluSq2	SINE	-0.469429	3.52e-41	Negative
VSMC	AluSq2	SINE	-0.369551	8.67e-25	Negative
CD4 SP	AluSq2	SINE	-0.290523	0	Negative
Th17	AluSq2	SINE	-0.241518	4.01e-27	Negative
Endothelial	AluSq2	SINE	-0.348516	4.61e-31	Negative
DC	AluSq2	SINE	-0.216933	2.38e-25	Negative
Mono/Macro	AluSq2	SINE	-0.237102	0.00665396	Negative
mTEC	AluSq2	SINE	-0.347317	4.31e-54	Negative
cTEC	AluSq2	SINE	-0.381607	1.28e-194	Negative
CD8 SP	AluSq2	SINE	-0.441329	0	Negative
CD8 SP	AluSq4	SINE	-0.319777	0	Negative
DC	AluSq4	SINE	-0.212295	2.34e-24	Negative
cTEC	AluSq4	SINE	-0.323817	1.36e-137	Negative
Endothelial	AluSq4	SINE	-0.261346	3.98e-18	Negative
VSMC	AluSq4	SINE	-0.273948	6.32e-14	Negative
mTEC	AluSq4	SINE	-0.289288	2.02e-37	Negative
Treg	AluSq4	SINE	-0.313326	4.31e-18	Negative
CD4 SP	AluSq4	SINE	-0.242677	0	Negative
Th17	AluSq4	SINE	-0.215575	6.88e-22	Negative
Th17	AluSx	SINE	-0.244672	8.79e-28	Negative
CD4 SP	AluSx	SINE	-0.294947	0	Negative
B_pro/pre	AluSx	SINE	-0.282741	0.0487157	Negative
mTEC	AluSx	SINE	-0.356072	8.37e-57	Negative
DP	AluSx	SINE	-0.200491	5.67e-258	Negative
CD8 SP	AluSx	SINE	-0.442672	0	Negative
cTEC	AluSx	SINE	-0.392597	8.58e-207	Negative
Endothelial	AluSx	SINE	-0.358842	1.68e-32	Negative
Mono/Macro	AluSx	SINE	-0.241931	0.0058733	Negative
VSMC	AluSx	SINE	-0.373706	3.31e-25	Negative
DC	AluSx	SINE	-0.232201	1.12e-28	Negative
Treg	AluSx	SINE	-0.463357	3.1e-40	Negative
Endothelial	AluSx1	SINE	-0.353369	1.04e-31	Negative
NKT	AluSx1	SINE	-0.216981	3.15e-07	Negative
Treg	AluSx1	SINE	-0.467248	7.22e-41	Negative
CD8 SP	AluSx1	SINE	-0.44063	0	Negative
Mono/Macro	AluSx1	SINE	-0.270291	0.00228708	Negative
Th17	AluSx1	SINE	-0.251119	3.29e-29	Negative
B_pro/pre	AluSx1	SINE	-0.277434	0.0487157	Negative
DP	AluSx1	SINE	-0.2049	1.63e-269	Negative
cTEC	AluSx1	SINE	-0.380898	7.47e-194	Negative
VSMC	AluSx1	SINE	-0.369678	8.67e-25	Negative
DC	AluSx1	SINE	-0.227095	1.36e-27	Negative
mTEC	AluSx1	SINE	-0.362239	9.04e-59	Negative
CD4 SP	AluSx1	SINE	-0.298821	0	Negative
CD4 SP	AluSx3	SINE	-0.290886	0	Negative
cTEC	AluSx3	SINE	-0.376351	6.06e-189	Negative
CD8 SP	AluSx3	SINE	-0.43903	0	Negative
B cell	AluSx3	SINE	-0.218668	1.13e-14	Negative
DC	AluSx3	SINE	-0.228817	6.34e-28	Negative
VSMC	AluSx3	SINE	-0.362806	7.13e-24	Negative
mTEC	AluSx3	SINE	-0.337156	6.55e-51	Negative
Endothelial	AluSx3	SINE	-0.286862	1.53e-21	Negative
Treg	AluSx3	SINE	-0.446373	3.05e-37	Negative
Mono/Macro	AluSx3	SINE	-0.265755	0.00271311	Negative
Th17	AluSx3	SINE	-0.23521	7.87e-26	Negative
CD4 SP	AluSx4	SINE	-0.302515	0	Negative
mTEC	AluSx4	SINE	-0.306532	4.92e-42	Negative
CD8 SP	AluSx4	SINE	-0.434417	0	Negative
B cell	AluSx4	SINE	-0.233177	1.92e-16	Negative
DC	AluSx4	SINE	-0.260273	2.6e-35	Negative
VSMC	AluSx4	SINE	-0.348905	4.55e-22	Negative
DP	AluSx4	SINE	-0.20035	1.14e-257	Negative
NK	AluSx4	SINE	-0.210588	2.06e-16	Negative
Endothelial	AluSx4	SINE	-0.309892	8.47e-25	Negative
Treg	AluSx4	SINE	-0.473048	7.84e-42	Negative
Th17	AluSx4	SINE	-0.274014	3.7e-34	Negative
Mono/Macro	AluSx4	SINE	-0.211373	0.0150818	Negative
cTEC	AluSx4	SINE	-0.367028	4.2e-179	Negative
cTEC	AluSz	SINE	-0.378529	2.83e-191	Negative
CD4 SP	AluSz	SINE	-0.294733	0	Negative
Endothelial	AluSz	SINE	-0.325829	2.57e-27	Negative
VSMC	AluSz	SINE	-0.378439	1.22e-25	Negative
DC	AluSz	SINE	-0.224782	4.45e-27	Negative
CD8 SP	AluSz	SINE	-0.439324	0	Negative
mTEC	AluSz	SINE	-0.352196	1.28e-55	Negative
Th17	AluSz	SINE	-0.259288	6.72e-31	Negative
Treg	AluSz	SINE	-0.484465	5.62e-44	Negative
CD4 SP	AluSz6	SINE	-0.298028	0	Negative
CD8 SP	AluSz6	SINE	-0.437502	0	Negative
B cell	AluSz6	SINE	-0.210526	8.23e-14	Negative
mTEC	AluSz6	SINE	-0.316739	6.93e-45	Negative
Endothelial	AluSz6	SINE	-0.33171	2.98e-28	Negative
cTEC	AluSz6	SINE	-0.385064	2.11e-198	Negative
Treg	AluSz6	SINE	-0.460329	8.92e-40	Negative
DC	AluSz6	SINE	-0.220288	4.66e-26	Negative
B_pro/pre	AluSz6	SINE	-0.290661	0.0487157	Negative
NK	AluSz6	SINE	-0.204157	1.38e-15	Negative
Th17	AluSz6	SINE	-0.24304	2.02e-27	Negative
VSMC	AluSz6	SINE	-0.361884	8.62e-24	Negative
Mono/Macro	AluY	SINE	-0.24174	0.0058733	Negative
Th17	AluY	SINE	-0.238234	1.93e-26	Negative
Endothelial	AluY	SINE	-0.342372	4.64e-30	Negative
Treg	AluY	SINE	-0.491315	5.8e-45	Negative
B cell	AluY	SINE	-0.201389	8.25e-13	Negative
cTEC	AluY	SINE	-0.372501	7.42e-185	Negative
VSMC	AluY	SINE	-0.376332	1.84e-25	Negative
DC	AluY	SINE	-0.22685	1.53e-27	Negative
B_pro/pre	AluY	SINE	-0.288511	0.0487157	Negative
CD4 SP	AluY	SINE	-0.288207	0	Negative
mTEC	AluY	SINE	-0.348094	2.51e-54	Negative
CD8 SP	AluY	SINE	-0.438253	0	Negative
cTEC	AluYa5	SINE	-0.200995	2.42e-52	Negative
Endothelial	AluYa5	SINE	-0.320588	1.86e-26	Negative
CD8 SP	AluYa5	SINE	-0.331145	0	Negative
CD4 SP	AluYa5	SINE	-0.246573	0	Negative
VSMC	AluYa5	SINE	-0.29889	2.12e-16	Negative
Treg	AluYa5	SINE	-0.450739	5.45e-38	Negative
Th17	AluYa5	SINE	-0.224731	1.09e-23	Negative
Mono/Macro	AluYa8	SINE	-0.22653	0.00900732	Negative
CD8 SP	AluYb8	SINE	-0.31987	0	Negative
cTEC	AluYb8	SINE	-0.28338	2.06e-104	Negative
Endothelial	AluYb8	SINE	-0.298568	3.49e-23	Negative
Mono/Macro	AluYb8	SINE	-0.309872	0.000420926	Negative
Treg	AluYb8	SINE	-0.378669	2e-26	Negative
CD4 SP	AluYb8	SINE	-0.251784	0	Negative
mTEC	AluYb8	SINE	-0.210339	4.12e-20	Negative
B cell	AluYb8	SINE	-0.213755	3.33e-14	Negative
DC	AluYb8	SINE	-0.228527	7.21e-28	Negative
NK	AluYb8	SINE	-0.203102	1.87e-15	Negative
VSMC	AluYb8	SINE	-0.220914	2.52e-09	Negative
cTEC	AluYb9	SINE	-0.245554	4.89e-78	Negative
Endothelial	AluYb9	SINE	-0.212325	2.29e-12	Negative
Treg	AluYc	SINE	-0.394375	8.97e-29	Negative
Th17	AluYc	SINE	-0.242074	3.13e-27	Negative
B cell	AluYc	SINE	-0.21712	1.58e-14	Negative
CD8 SP	AluYc	SINE	-0.36636	0	Negative
CD4 SP	AluYc	SINE	-0.282693	0	Negative
cTEC	AluYc	SINE	-0.348858	7.63e-161	Negative
VSMC	AluYc	SINE	-0.284154	6.31e-15	Negative
DC	AluYc	SINE	-0.219739	6.1e-26	Negative
Endothelial	AluYc	SINE	-0.289078	7.37e-22	Negative
Mono/Macro	AluYc	SINE	-0.285484	0.00123594	Negative
mTEC	AluYc	SINE	-0.281086	2.42e-35	Negative
mTEC	AluYc3	SINE	-0.205325	3.23e-19	Negative
DC	AluYc3	SINE	-0.209712	8.65e-24	Negative
Endothelial	AluYc3	SINE	-0.250243	1.01e-16	Negative
cTEC	AluYc3	SINE	-0.274913	3.98e-98	Negative
CD8 SP	AluYc3	SINE	-0.248463	0	Negative
Treg	AluYc3	SINE	-0.226477	1.09e-09	Negative
Mono/Macro	AluYc3	SINE	-0.213199	0.0143208	Negative
VSMC	AluYc3	SINE	-0.232761	2.99e-10	Negative
mTEC	AluYe5	SINE	-0.223899	1.21e-22	Negative
Treg	AluYe5	SINE	-0.29105	1.23e-15	Negative
DC	AluYe5	SINE	-0.228278	7.94e-28	Negative
CD8 SP	AluYe5	SINE	-0.29834	0	Negative
CD4 SP	AluYe5	SINE	-0.239075	0	Negative
Mono/Macro	AluYe5	SINE	-0.302784	0.000547398	Negative
VSMC	AluYe5	SINE	-0.217209	4.87e-09	Negative
Endothelial	AluYe5	SINE	-0.257284	1.32e-17	Negative
cTEC	AluYe5	SINE	-0.29063	5.69e-110	Negative
VSMC	AluYf1	SINE	-0.279212	1.98e-14	Negative
DC	AluYf1	SINE	-0.216948	2.38e-25	Negative
CD4 SP	AluYf1	SINE	-0.262343	0	Negative
B cell	AluYf1	SINE	-0.206572	2.32e-13	Negative
mTEC	AluYf1	SINE	-0.207552	1.3e-19	Negative
Treg	AluYf1	SINE	-0.366428	9.97e-25	Negative
CD8 SP	AluYf1	SINE	-0.322886	0	Negative
cTEC	AluYf1	SINE	-0.317619	3.72e-132	Negative
Endothelial	AluYf1	SINE	-0.310316	7.54e-25	Negative
NKT	AluYf1	SINE	-0.210744	6.83e-07	Negative
Mono/Macro	AluYf1	SINE	-0.365353	2.27e-05	Negative
Th17	AluYf1	SINE	-0.207711	2.17e-20	Negative
Treg	AluYg6	SINE	-0.321856	4.42e-19	Negative
Mono/Macro	AluYg6	SINE	-0.217154	0.0124687	Negative
CD8 SP	AluYg6	SINE	-0.246009	0	Negative
CD4 SP	AluYg6	SINE	-0.204181	1.84996620947439e-313	Negative
mTEC	AluYg6	SINE	-0.200619	2.13e-18	Negative
DC	AluYg6	SINE	-0.207452	2.53e-23	Negative
cTEC	AluYg6	SINE	-0.287246	2.34e-107	Negative
Endothelial	AluYg6	SINE	-0.22776	4.78e-14	Negative
VSMC	AluYg6	SINE	-0.235589	1.76e-10	Negative
CD8 SP	AluYh3	SINE	-0.333832	0	Negative
CD4 SP	AluYh3	SINE	-0.251699	0	Negative
cTEC	AluYh3	SINE	-0.312601	7.41e-128	Negative
DC	AluYh3	SINE	-0.214645	7.51e-25	Negative
Th17	AluYh3	SINE	-0.233084	2.17e-25	Negative
VSMC	AluYh3	SINE	-0.266057	3.52e-13	Negative
Endothelial	AluYh3	SINE	-0.266482	8.7e-19	Negative
Treg	AluYh3	SINE	-0.336002	8.83e-21	Negative
mTEC	AluYh3	SINE	-0.219338	8.99e-22	Negative
cTEC	AluYh3a3	SINE	-0.217109	5.41e-61	Negative
Endothelial	AluYi6	SINE	-0.208996	5.16e-12	Negative
mTEC	AluYj4	SINE	-0.245312	5.08e-27	Negative
Endothelial	AluYj4	SINE	-0.278182	2.51e-20	Negative
cTEC	AluYj4	SINE	-0.353501	2.14e-165	Negative
NK	AluYj4	SINE	-0.2011	3.28e-15	Negative
CD4 SP	AluYj4	SINE	-0.264314	0	Negative
B cell	AluYj4	SINE	-0.228646	7.58e-16	Negative
DC	AluYj4	SINE	-0.241427	8.96e-31	Negative
CD8 SP	AluYj4	SINE	-0.342754	0	Negative
Treg	AluYj4	SINE	-0.330771	3.82e-20	Negative
VSMC	AluYj4	SINE	-0.290013	1.7e-15	Negative
Mono/Macro	AluYj4	SINE	-0.304146	0.000526093	Negative
Mono/Macro	AluYk11	SINE	-0.261053	0.00309236	Negative
DC	AluYk11	SINE	-0.261789	1.6e-35	Negative
DC	AluYk2	SINE	-0.239251	2.82e-30	Negative
Endothelial	AluYk2	SINE	-0.257553	1.23e-17	Negative
Treg	AluYk2	SINE	-0.21356	1.07e-08	Negative
cTEC	AluYk2	SINE	-0.292265	3.02e-111	Negative
VSMC	AluYk2	SINE	-0.250487	9.16e-12	Negative
mTEC	AluYk2	SINE	-0.212378	1.77e-20	Negative
CD8 SP	AluYk2	SINE	-0.266354	0	Negative
mTEC	AluYk3	SINE	-0.228963	1.25e-23	Negative
cTEC	AluYk3	SINE	-0.306028	2.4e-122	Negative
VSMC	AluYk3	SINE	-0.214089	8.31e-09	Negative
Endothelial	AluYk3	SINE	-0.230415	2.39e-14	Negative
CD4 SP	AluYk3	SINE	-0.22983	0	Negative
CD8 SP	AluYk3	SINE	-0.299011	0	Negative
Mono/Macro	AluYk3	SINE	-0.212205	0.014799	Negative
Treg	AluYk3	SINE	-0.28456	5.78e-15	Negative
Endothelial	AluYk4	SINE	-0.287145	1.41e-21	Negative
cTEC	AluYk4	SINE	-0.296576	1.16e-114	Negative
CD4 SP	AluYk4	SINE	-0.234467	0	Negative
CD8 SP	AluYk4	SINE	-0.281986	0	Negative
VSMC	AluYk4	SINE	-0.265165	4.18e-13	Negative
Treg	AluYk4	SINE	-0.340563	2.4e-21	Negative
DC	AluYk4	SINE	-0.242396	6.05e-31	Negative
NK	AluYk4	SINE	-0.215651	4.54e-17	Negative
mTEC	AluYk4	SINE	-0.231585	3.71e-24	Negative
NKT	AluYk4	SINE	-0.224832	1.41e-07	Negative
Mono/Macro	AluYk4	SINE	-0.266763	0.00260973	Negative
B cell	AluYm1	SINE	-0.219848	8.48e-15	Negative
CD8 SP	AluYm1	SINE	-0.411067	0	Negative
CD4 SP	AluYm1	SINE	-0.301138	0	Negative
DC	AluYm1	SINE	-0.233559	5.26e-29	Negative
mTEC	AluYm1	SINE	-0.247928	1.39e-27	Negative
NK	AluYm1	SINE	-0.207641	4.98e-16	Negative
Mono/Macro	AluYm1	SINE	-0.231751	0.00760775	Negative
Th17	AluYm1	SINE	-0.247047	2.66e-28	Negative
Treg	AluYm1	SINE	-0.434804	3.17e-35	Negative
Endothelial	AluYm1	SINE	-0.301051	1.55e-23	Negative
cTEC	AluYm1	SINE	-0.328667	6.44e-142	Negative
VSMC	AluYm1	SINE	-0.320082	1.21e-18	Negative
cTEC	AmnSINE1	SINE	-0.257328	8.9e-86	Negative
Treg	CR1_Mam	LINE	-0.201955	7.24e-08	Negative
cTEC	CR1_Mam	LINE	-0.298642	2.58e-116	Negative
Mono/Macro	CR1_Mam	LINE	-0.229089	0.00833075	Negative
mTEC	CR1_Mam	LINE	-0.31272	9.56e-44	Negative
NK	CR1_Mam	LINE	-0.201633	2.88e-15	Negative
cTEC	CR1-3_Croc	LINE	-0.233039	2.98e-70	Negative
mTEC	CR1-3_Croc	LINE	-0.200926	1.89e-18	Negative
Treg	ERV3-16A3_I-int	LTR	-0.261625	1.02e-12	Negative
cTEC	ERV3-16A3_I-int	LTR	-0.290466	7.61e-110	Negative
mTEC	ERV3-16A3_I-int	LTR	-0.275276	6.65e-34	Negative
cTEC	ERVL-B4-int	LTR	-0.317732	2.98e-132	Negative
mTEC	ERVL-B4-int	LTR	-0.306562	4.86e-42	Negative
cTEC	ERVL-E-int	LTR	-0.323777	1.47e-137	Negative
VSMC	ERVL-E-int	LTR	-0.271844	9.88e-14	Negative
mTEC	ERVL-E-int	LTR	-0.311296	2.36e-43	Negative
Endothelial	ERVL-E-int	LTR	-0.269333	3.57e-19	Negative
Treg	FAM	SINE	-0.359948	7.62e-24	Negative
CD8 SP	FAM	SINE	-0.296973	0	Negative
VSMC	FAM	SINE	-0.266777	3.05e-13	Negative
cTEC	FAM	SINE	-0.373828	2.92e-186	Negative
DC	FAM	SINE	-0.231593	1.5e-28	Negative
CD4 SP	FAM	SINE	-0.237804	0	Negative
NK	FAM	SINE	-0.21544	4.69e-17	Negative
Th17	FAM	SINE	-0.232782	2.47e-25	Negative
mTEC	FAM	SINE	-0.287688	5.19e-37	Negative
Endothelial	FAM	SINE	-0.291439	3.62e-22	Negative
Th17	FLAM_A	SINE	-0.224529	1.16e-23	Negative
cTEC	FLAM_A	SINE	-0.366696	9.11e-179	Negative
NK	FLAM_A	SINE	-0.237089	4.11e-20	Negative
VSMC	FLAM_A	SINE	-0.312584	7.69e-18	Negative
Endothelial	FLAM_A	SINE	-0.269386	3.54e-19	Negative
B cell	FLAM_A	SINE	-0.227568	8.19e-16	Negative
DC	FLAM_A	SINE	-0.267876	6.43e-37	Negative
CD4 SP	FLAM_A	SINE	-0.265867	0	Negative
CD8 SP	FLAM_A	SINE	-0.328863	0	Negative
mTEC	FLAM_A	SINE	-0.324591	3.71e-47	Negative
Mono/Macro	FLAM_A	SINE	-0.205938	0.0181471	Negative
Treg	FLAM_A	SINE	-0.379114	1.75e-26	Negative
NKT	FLAM_C	SINE	-0.24456	8.31e-09	Negative
Treg	FLAM_C	SINE	-0.406801	1.35e-30	Negative
Th17	FLAM_C	SINE	-0.255201	4.84e-30	Negative
NK	FLAM_C	SINE	-0.208702	3.6e-16	Negative
mTEC	FLAM_C	SINE	-0.31877	1.78e-45	Negative
DC	FLAM_C	SINE	-0.254394	9.46e-34	Negative
B cell	FLAM_C	SINE	-0.236679	9.41e-17	Negative
CD4 SP	FLAM_C	SINE	-0.291121	0	Negative
Endothelial	FLAM_C	SINE	-0.269612	3.32e-19	Negative
VSMC	FLAM_C	SINE	-0.315325	3.8e-18	Negative
CD8 SP	FLAM_C	SINE	-0.376897	0	Negative
cTEC	FLAM_C	SINE	-0.374998	1.65e-187	Negative
CD8 SP	FRAM	SINE	-0.321667	0	Negative
DC	FRAM	SINE	-0.231534	1.51e-28	Negative
CD4 SP	FRAM	SINE	-0.254178	0	Negative
NK	FRAM	SINE	-0.20605	8.11e-16	Negative
cTEC	FRAM	SINE	-0.345009	3.94e-157	Negative
Treg	FRAM	SINE	-0.427608	4.95e-34	Negative
Th17	FRAM	SINE	-0.220921	6.21e-23	Negative
Endothelial	FRAM	SINE	-0.270015	2.97e-19	Negative
VSMC	FRAM	SINE	-0.273795	6.48e-14	Negative
Mono/Macro	FRAM	SINE	-0.31947	0.000324783	Negative
mTEC	FRAM	SINE	-0.29986	3.28e-40	Negative
NK	HAL1	LINE	-0.200024	4.51e-15	Negative
mTEC	HAL1	LINE	-0.384252	6.24e-66	Negative
Treg	HAL1	LINE	-0.400197	1.31e-29	Negative
Mono/Macro	HAL1	LINE	-0.21701	0.0124687	Negative
CD8 SP	HAL1	LINE	-0.317225	0	Negative
CD4 SP	HAL1	LINE	-0.247188	0	Negative
cTEC	HAL1	LINE	-0.417585	2.41e-236	Negative
B cell	HAL1	LINE	-0.201838	7.45e-13	Negative
Th17	HAL1	LINE	-0.240054	7.96e-27	Negative
VSMC	HAL1	LINE	-0.31731	2.25e-18	Negative
Endothelial	HAL1	LINE	-0.262337	3.01e-18	Negative
Endothelial	HAL1b	LINE	-0.277185	3.39e-20	Negative
DC	HAL1b	LINE	-0.235954	1.38e-29	Negative
cTEC	HAL1b	LINE	-0.348156	3.67e-160	Negative
Treg	HAL1b	LINE	-0.266585	3.47e-13	Negative
Mono/Macro	HAL1b	LINE	-0.233532	0.00733349	Negative
NK	HAL1b	LINE	-0.203149	1.87e-15	Negative
VSMC	HAL1b	LINE	-0.235865	1.69e-10	Negative
mTEC	HAL1b	LINE	-0.319801	9.14e-46	Negative
Endothelial	HAL1M8	LINE	-0.235815	5.76e-15	Negative
Treg	HAL1M8	LINE	-0.282256	9.87e-15	Negative
cTEC	HAL1M8	LINE	-0.31484	9.17e-130	Negative
CD8 SP	HAL1M8	LINE	-0.201249	5.51e-300	Negative
mTEC	HAL1M8	LINE	-0.288034	4.24e-37	Negative
Mono/Macro	HAL1M8	LINE	-0.280936	0.00143162	Negative
Mono/Macro	HAL1ME	LINE	-0.322304	0.00028616	Negative
DC	HAL1ME	LINE	-0.204743	9.35e-23	Negative
CD4 SP	HAL1ME	LINE	-0.203265	1.2807476665668e-310	Negative
CD8 SP	HAL1ME	LINE	-0.236181	0	Negative
mTEC	HAL1ME	LINE	-0.344668	2.93e-53	Negative
cTEC	HAL1ME	LINE	-0.381976	5.17e-195	Negative
Th17	HAL1ME	LINE	-0.201884	2.51e-19	Negative
VSMC	HAL1ME	LINE	-0.211851	1.22e-08	Negative
Treg	HAL1ME	LINE	-0.288454	2.29e-15	Negative
Endothelial	HAL1ME	LINE	-0.282553	6e-21	Negative
Endothelial	Harlequin-int	LTR	-0.265272	1.26e-18	Negative
cTEC	Harlequin-int	LTR	-0.347201	3.06e-159	Negative
Treg	Harlequin-int	LTR	-0.245093	3.14e-11	Negative
DC	Harlequin-int	LTR	-0.208476	1.54e-23	Negative
mTEC	Harlequin-int	LTR	-0.360617	2.97e-58	Negative
B_pro/pre	HERV15-int	LTR	-0.307092	0.0487157	Negative
mTEC	HERV17-int	LTR	-0.216651	2.87e-21	Negative
cTEC	HERV17-int	LTR	-0.223411	1.45e-64	Negative
cTEC	HERV3-int	LTR	-0.219503	2.47e-62	Negative
mTEC	HERV3-int	LTR	-0.217797	1.76e-21	Negative
cTEC	HERV35I-int	LTR	-0.202166	6.07e-53	Negative
mTEC	HERV35I-int	LTR	-0.208563	8.63e-20	Negative
Treg	HERV35I-int	LTR	-0.243762	4.03e-11	Negative
mTEC	HERV4_I-int	LTR	-0.215627	4.47e-21	Negative
mTEC	HERV9-int	LTR	-0.20769	1.23e-19	Negative
mTEC	HERVE_a-int	LTR	-0.247746	1.51e-27	Negative
Mono/Macro	HERVFH19-int	LTR	-0.206569	0.0177464	Negative
Endothelial	HERVH-int	LTR	-0.297637	4.67e-23	Negative
CD8 SP	HERVH-int	LTR	-0.230941	0	Negative
Treg	HERVH-int	LTR	-0.327926	8.36e-20	Negative
NK	HERVH-int	LTR	-0.222262	4.84e-18	Negative
Th17	HERVH-int	LTR	-0.201655	2.71e-19	Negative
cTEC	HERVH-int	LTR	-0.424309	1.05e-244	Negative
VSMC	HERVH-int	LTR	-0.283098	7.95e-15	Negative
DC	HERVH-int	LTR	-0.236528	1.06e-29	Negative
mTEC	HERVH-int	LTR	-0.324709	3.45e-47	Negative
Mono/Macro	HERVH-int	LTR	-0.224382	0.00977438	Negative
CD4 SP	HERVH-int	LTR	-0.220933	0	Negative
cTEC	HERVH48-int	LTR	-0.240607	6.56e-75	Negative
cTEC	HERVIP10B3-int	LTR	-0.224514	3.35e-65	Negative
mTEC	HERVIP10F-int	LTR	-0.255351	3.12e-29	Negative
mTEC	HERVIP10FH-int	LTR	-0.289603	1.68e-37	Negative
cTEC	HERVIP10FH-int	LTR	-0.305982	2.61e-122	Negative
Endothelial	HERVIP10FH-int	LTR	-0.234076	9.04e-15	Negative
mTEC	HERVK-int	LTR	-0.2374	2.38e-25	Negative
cTEC	HERVK-int	LTR	-0.250035	6.26e-81	Negative
cTEC	HERVK11-int	LTR	-0.248795	3.99e-80	Negative
cTEC	HERVK13-int	LTR	-0.22428	4.57e-65	Negative
mTEC	HERVK3-int	LTR	-0.20789	1.14e-19	Negative
mTEC	HERVK9-int	LTR	-0.21976	7.48e-22	Negative
cTEC	HERVK9-int	LTR	-0.259661	2.33e-87	Negative
Endothelial	HERVK9-int	LTR	-0.201789	2.87e-11	Negative
cTEC	HERVL-int	LTR	-0.262214	4.12e-89	Negative
mTEC	HERVL-int	LTR	-0.296903	2.05e-39	Negative
cTEC	HERVL40-int	LTR	-0.220633	5.66e-63	Negative
mTEC	HERVP71A-int	LTR	-0.280889	2.71e-35	Negative
cTEC	HERVS71-int	LTR	-0.27075	4.11e-95	Negative
mTEC	HERVS71-int	LTR	-0.295652	4.37e-39	Negative
mTEC	HUERS-P1-int	LTR	-0.228259	1.7e-23	Negative
mTEC	HUERS-P3-int	LTR	-0.203117	7.94e-19	Negative
Endothelial	HUERS-P3b-int	LTR	-0.242872	8.31e-16	Negative
cTEC	HUERS-P3b-int	LTR	-0.225003	1.74e-65	Negative
Mono/Macro	L1HS	LINE	-0.244041	0.00547486	Negative
cTEC	L1HS	LINE	-0.276535	2.58e-99	Negative
DC	L1HS	LINE	-0.244559	2.06e-31	Negative
Endothelial	L1HS	LINE	-0.317069	7.1e-26	Negative
Treg	L1HS	LINE	-0.37014	3.15e-25	Negative
Mono/Macro	L1M	LINE	-0.26096	0.00309236	Negative
mTEC	L1M1	LINE	-0.32831	3e-48	Negative
Endothelial	L1M1	LINE	-0.28529	2.54e-21	Negative
cTEC	L1M1	LINE	-0.446141	7.05e-273	Negative
CD8 SP	L1M1	LINE	0.288422	0	Positive
VSMC	L1M2	LINE	-0.279024	2.02e-14	Negative
CD4 SP	L1M2	LINE	-0.206706	2.19365146753513e-321	Negative
NK	L1M2	LINE	-0.208858	3.52e-16	Negative
cTEC	L1M2	LINE	-0.399651	6.67e-215	Negative
CD8 SP	L1M2	LINE	-0.229296	0	Negative
mTEC	L1M2	LINE	-0.353646	4.64e-56	Negative
Th17	L1M2	LINE	-0.226483	5.07e-24	Negative
Treg	L1M2	LINE	-0.375473	5.53e-26	Negative
Endothelial	L1M2	LINE	-0.271238	2.07e-19	Negative
DC	L1M2	LINE	-0.228797	6.34e-28	Negative
Endothelial	L1M2a	LINE	-0.235391	6.46e-15	Negative
VSMC	L1M2a	LINE	-0.232525	3.1e-10	Negative
cTEC	L1M2a	LINE	-0.272884	1.19e-96	Negative
Mono/Macro	L1M2a	LINE	-0.207624	0.0172336	Negative
Treg	L1M2a	LINE	-0.207896	2.71e-08	Negative
mTEC	L1M2a	LINE	-0.255854	2.42e-29	Negative
mTEC	L1M2c	LINE	-0.269561	1.62e-32	Negative
cTEC	L1M2c	LINE	-0.264019	2.33e-90	Negative
Treg	L1M3	LINE	-0.300227	1.29e-16	Negative
Endothelial	L1M3	LINE	-0.309591	9.08e-25	Negative
CD8 SP	L1M3	LINE	-0.217746	0	Negative
mTEC	L1M3	LINE	-0.310124	4.89e-43	Negative
VSMC	L1M3	LINE	-0.264942	4.36e-13	Negative
NK	L1M3	LINE	-0.247998	2e-21	Negative
cTEC	L1M3	LINE	-0.35225	3.69e-164	Negative
Endothelial	L1M3c	LINE	-0.207671	7.15e-12	Negative
cTEC	L1M3c	LINE	-0.229273	5.36e-68	Negative
mTEC	L1M3c	LINE	-0.200993	1.85e-18	Negative
mTEC	L1M3de	LINE	-0.211826	2.23e-20	Negative
mTEC	L1M3e	LINE	-0.200091	2.61e-18	Negative
cTEC	L1M3e	LINE	-0.242131	7.31e-76	Negative
DC	L1M3f	LINE	-0.214554	7.79e-25	Negative
mTEC	L1M3f	LINE	-0.211502	2.55e-20	Negative
Endothelial	L1M3f	LINE	-0.218613	4.88e-13	Negative
cTEC	L1M3f	LINE	-0.265205	3.47e-91	Negative
CD4 SP	L1M4	LINE	-0.242481	0	Negative
CD8 SP	L1M4	LINE	-0.317991	0	Negative
Endothelial	L1M4	LINE	-0.299495	2.54e-23	Negative
NK	L1M4	LINE	-0.20885	3.52e-16	Negative
Treg	L1M4	LINE	-0.423173	2.65e-33	Negative
Th17	L1M4	LINE	-0.28146	5.53e-36	Negative
cTEC	L1M4	LINE	-0.430891	4.81e-253	Negative
VSMC	L1M4	LINE	-0.318369	1.72e-18	Negative
mTEC	L1M4	LINE	-0.356085	8.37e-57	Negative
NKT	L1M4a1	LINE	-0.225915	1.39e-07	Negative
DC	L1M4a1	LINE	-0.218102	1.34e-25	Negative
VSMC	L1M4a1	LINE	-0.230387	4.59e-10	Negative
Treg	L1M4a1	LINE	-0.293643	6.57e-16	Negative
Endothelial	L1M4a1	LINE	-0.22979	2.81e-14	Negative
Mono/Macro	L1M4a1	LINE	-0.289014	0.00101997	Negative
Th17	L1M4a1	LINE	-0.217892	2.42e-22	Negative
mTEC	L1M4a1	LINE	-0.335295	2.41e-50	Negative
cTEC	L1M4a1	LINE	-0.363221	3.47e-175	Negative
Endothelial	L1M4a2	LINE	-0.293277	2.13e-22	Negative
Treg	L1M4a2	LINE	-0.262465	8.57e-13	Negative
Mono/Macro	L1M4a2	LINE	-0.238661	0.00639658	Negative
VSMC	L1M4a2	LINE	-0.265835	3.67e-13	Negative
mTEC	L1M4a2	LINE	-0.283236	7.04e-36	Negative
DC	L1M4a2	LINE	-0.220757	3.72e-26	Negative
cTEC	L1M4a2	LINE	-0.316189	6.37e-131	Negative
Mono/Macro	L1M4b	LINE	-0.251013	0.00423958	Negative
mTEC	L1M4b	LINE	-0.352227	1.28e-55	Negative
VSMC	L1M4b	LINE	-0.287679	2.8e-15	Negative
Treg	L1M4b	LINE	-0.315209	2.61e-18	Negative
Endothelial	L1M4b	LINE	-0.253603	3.9e-17	Negative
cTEC	L1M4b	LINE	-0.378441	3.44e-191	Negative
cTEC	L1M4c	LINE	-0.38596	2.22e-199	Negative
mTEC	L1M4c	LINE	-0.355742	1.04e-56	Negative
Mono/Macro	L1M4c	LINE	-0.363033	2.36e-05	Negative
Treg	L1M4c	LINE	-0.284134	6.35e-15	Negative
VSMC	L1M4c	LINE	-0.272993	7.65e-14	Negative
Endothelial	L1M4c	LINE	-0.304656	4.55e-24	Negative
CD8 SP	L1M4c	LINE	-0.204657	2.13741305891689e-310	Negative
DC	L1M4c	LINE	-0.217957	1.43e-25	Negative
Treg	L1M5	LINE	-0.448538	1.34e-37	Negative
Endothelial	L1M5	LINE	-0.264607	1.54e-18	Negative
DC	L1M5	LINE	-0.213547	1.28e-24	Negative
CD8 SP	L1M5	LINE	-0.341648	0	Negative
CD4 SP	L1M5	LINE	-0.254293	0	Negative
NK	L1M5	LINE	-0.211633	1.76e-16	Negative
NKT	L1M5	LINE	-0.213515	4.79e-07	Negative
Th17	L1M5	LINE	-0.248957	1.03e-28	Negative
cTEC	L1M5	LINE	-0.455902	2.25e-286	Negative
VSMC	L1M5	LINE	-0.334145	3.01e-20	Negative
mTEC	L1M5	LINE	-0.367507	1.89e-60	Negative
mTEC	L1M6	LINE	-0.318665	1.9e-45	Negative
cTEC	L1M6	LINE	-0.378468	3.26e-191	Negative
DC	L1M6	LINE	-0.205657	6.1e-23	Negative
Treg	L1M6	LINE	-0.284577	5.78e-15	Negative
Th17	L1M6	LINE	-0.200399	4.62e-19	Negative
Mono/Macro	L1M6	LINE	-0.281686	0.00140238	Negative
Endothelial	L1M6	LINE	-0.275958	5e-20	Negative
VSMC	L1M6	LINE	-0.260587	1.13e-12	Negative
cTEC	L1M6B	LINE	-0.244324	2.98e-77	Negative
DC	L1M7	LINE	-0.213251	1.48e-24	Negative
VSMC	L1M7	LINE	-0.235584	1.76e-10	Negative
Treg	L1M7	LINE	-0.244266	3.69e-11	Negative
mTEC	L1M7	LINE	-0.311537	2.03e-43	Negative
Th17	L1M7	LINE	-0.208301	1.69e-20	Negative
Mono/Macro	L1M7	LINE	-0.255311	0.00363613	Negative
cTEC	L1M7	LINE	-0.342602	7.84e-155	Negative
Endothelial	L1M7	LINE	-0.282894	5.41e-21	Negative
Treg	L1M8	LINE	-0.274588	5.77e-14	Negative
mTEC	L1M8	LINE	-0.266729	7.65e-32	Negative
Endothelial	L1M8	LINE	-0.243444	7.07e-16	Negative
cTEC	L1M8	LINE	-0.308393	2.58e-124	Negative
VSMC	L1M8	LINE	-0.215555	6.52e-09	Negative
DC	L1M8	LINE	-0.241483	8.96e-31	Negative
Mono/Macro	L1M8	LINE	-0.211018	0.0152325	Negative
mTEC	L1MA1	LINE	-0.305808	7.76e-42	Negative
Mono/Macro	L1MA1	LINE	-0.264662	0.00278216	Negative
Treg	L1MA1	LINE	-0.220182	3.38e-09	Negative
cTEC	L1MA1	LINE	-0.415943	2.31e-234	Negative
VSMC	L1MA1	LINE	-0.278179	2.44e-14	Negative
Endothelial	L1MA1	LINE	-0.292085	3e-22	Negative
Mono/Macro	L1MA10	LINE	-0.232899	0.00743689	Negative
DC	L1MA10	LINE	-0.20206	3.22e-22	Negative
Treg	L1MA10	LINE	-0.225439	1.31e-09	Negative
Endothelial	L1MA10	LINE	-0.226775	6.12e-14	Negative
cTEC	L1MA10	LINE	-0.326462	6.01e-140	Negative
mTEC	L1MA10	LINE	-0.266074	1.09e-31	Negative
cTEC	L1MA2	LINE	-0.404524	1.33e-220	Negative
mTEC	L1MA2	LINE	-0.343841	5.22e-53	Negative
Mono/Macro	L1MA2	LINE	-0.244569	0.00542148	Negative
VSMC	L1MA2	LINE	-0.274075	6.2e-14	Negative
Endothelial	L1MA2	LINE	-0.300347	1.9e-23	Negative
Treg	L1MA2	LINE	-0.341874	1.66e-21	Negative
CD8 SP	L1MA3	LINE	-0.228656	0	Negative
DC	L1MA3	LINE	-0.228039	8.87e-28	Negative
Treg	L1MA3	LINE	-0.340663	2.36e-21	Negative
Mono/Macro	L1MA3	LINE	-0.273904	0.00190269	Negative
Endothelial	L1MA3	LINE	-0.26905	3.88e-19	Negative
mTEC	L1MA3	LINE	-0.370676	1.67e-61	Negative
VSMC	L1MA3	LINE	-0.302983	7.84e-17	Negative
cTEC	L1MA3	LINE	-0.415574	6.42e-234	Negative
Treg	L1MA4	LINE	-0.357339	1.65e-23	Negative
cTEC	L1MA4	LINE	-0.391844	6.07e-206	Negative
DC	L1MA4	LINE	-0.205052	8.14e-23	Negative
Mono/Macro	L1MA4	LINE	-0.261907	0.00308923	Negative
Endothelial	L1MA4	LINE	-0.276234	4.61e-20	Negative
CD8 SP	L1MA4	LINE	-0.24064	0	Negative
mTEC	L1MA4	LINE	-0.340107	8.18e-52	Negative
VSMC	L1MA4	LINE	-0.306528	3.25e-17	Negative
DC	L1MA4A	LINE	-0.23838	4.13e-30	Negative
cTEC	L1MA4A	LINE	-0.381968	5.2e-195	Negative
Mono/Macro	L1MA4A	LINE	-0.295639	0.000757383	Negative
Treg	L1MA4A	LINE	-0.374269	8.16e-26	Negative
VSMC	L1MA4A	LINE	-0.275717	4.27e-14	Negative
mTEC	L1MA4A	LINE	-0.347409	4.09e-54	Negative
Endothelial	L1MA4A	LINE	-0.260896	4.55e-18	Negative
VSMC	L1MA5	LINE	-0.324262	4.7e-19	Negative
Th17	L1MA5	LINE	-0.227248	3.55e-24	Negative
NKT	L1MA5	LINE	-0.252744	2.54e-09	Negative
cTEC	L1MA5	LINE	-0.31059	3.67e-126	Negative
Treg	L1MA5	LINE	-0.395062	7.15e-29	Negative
mTEC	L1MA5	LINE	-0.2591	4.47e-30	Negative
CD8 SP	L1MA5	LINE	-0.245711	0	Negative
CD4 SP	L1MA5	LINE	-0.20339	5.36615215097148e-311	Negative
Endothelial	L1MA5	LINE	-0.292384	2.75e-22	Negative
NK	L1MA5	LINE	-0.246059	2.32e-21	Negative
Th17	L1MA5A	LINE	-0.200146	4.99e-19	Negative
Mono/Macro	L1MA5A	LINE	-0.304916	0.000526093	Negative
mTEC	L1MA5A	LINE	-0.328923	1.99e-48	Negative
VSMC	L1MA5A	LINE	-0.270086	1.47e-13	Negative
DC	L1MA5A	LINE	-0.228276	7.94e-28	Negative
cTEC	L1MA5A	LINE	-0.349522	1.74e-161	Negative
Endothelial	L1MA5A	LINE	-0.25583	2.02e-17	Negative
Treg	L1MA5A	LINE	-0.303196	6.07e-17	Negative
CD8 SP	L1MA5A	LINE	-0.203687	2.05e-307	Negative
Endothelial	L1MA6	LINE	-0.293006	2.3e-22	Negative
VSMC	L1MA6	LINE	-0.257547	2.12e-12	Negative
Mono/Macro	L1MA6	LINE	-0.303971	0.000526093	Negative
cTEC	L1MA6	LINE	-0.36634	2.12e-178	Negative
DC	L1MA6	LINE	-0.218764	1.01e-25	Negative
Treg	L1MA6	LINE	-0.276314	3.93e-14	Negative
mTEC	L1MA6	LINE	-0.360403	3.42e-58	Negative
DC	L1MA7	LINE	-0.219511	6.8e-26	Negative
NKT	L1MA7	LINE	-0.22658	1.36e-07	Negative
Treg	L1MA7	LINE	-0.353412	5.39e-23	Negative
Th17	L1MA7	LINE	-0.238192	1.93e-26	Negative
CD8 SP	L1MA7	LINE	-0.238816	0	Negative
cTEC	L1MA7	LINE	-0.434037	3.91e-257	Negative
mTEC	L1MA7	LINE	-0.356055	8.37e-57	Negative
VSMC	L1MA7	LINE	-0.293356	7.91e-16	Negative
Endothelial	L1MA7	LINE	-0.261925	3.37e-18	Negative
CD4 SP	L1MA7	LINE	-0.201882	2.4e-306	Negative
NK	L1MA7	LINE	-0.212868	1.16e-16	Negative
CD8 SP	L1MA8	LINE	-0.220168	0	Negative
Mono/Macro	L1MA8	LINE	-0.264289	0.00279068	Negative
cTEC	L1MA8	LINE	-0.398852	5.48e-214	Negative
mTEC	L1MA8	LINE	-0.365634	6.89e-60	Negative
Treg	L1MA8	LINE	-0.343956	9.09e-22	Negative
VSMC	L1MA8	LINE	-0.257169	2.28e-12	Negative
Endothelial	L1MA8	LINE	-0.244382	5.44e-16	Negative
mTEC	L1MA9	LINE	-0.338196	3.19e-51	Negative
CD8 SP	L1MA9	LINE	-0.270555	0	Negative
Endothelial	L1MA9	LINE	-0.275862	5.03e-20	Negative
cTEC	L1MA9	LINE	-0.418963	5.16e-238	Negative
Th17	L1MA9	LINE	-0.234399	1.14e-25	Negative
Treg	L1MA9	LINE	-0.403174	4.69e-30	Negative
VSMC	L1MA9	LINE	-0.302197	9.46e-17	Negative
CD4 SP	L1MA9	LINE	-0.252229	0	Negative
NK	L1MA9	LINE	-0.231997	1.65e-19	Negative
Treg	L1MB1	LINE	-0.318131	1.22e-18	Negative
Mono/Macro	L1MB1	LINE	-0.258555	0.00320186	Negative
VSMC	L1MB1	LINE	-0.264752	4.5e-13	Negative
mTEC	L1MB1	LINE	-0.34768	3.38e-54	Negative
cTEC	L1MB1	LINE	-0.414593	9.57e-233	Negative
Endothelial	L1MB1	LINE	-0.223794	1.32e-13	Negative
Th17	L1MB1	LINE	-0.200296	4.78e-19	Negative
CD8 SP	L1MB1	LINE	-0.234704	0	Negative
Endothelial	L1MB2	LINE	-0.253646	3.88e-17	Negative
Th17	L1MB2	LINE	-0.211967	3.45e-21	Negative
cTEC	L1MB2	LINE	-0.395654	2.71e-210	Negative
NK	L1MB2	LINE	-0.201405	3.06e-15	Negative
Treg	L1MB2	LINE	-0.363111	2.84e-24	Negative
CD8 SP	L1MB2	LINE	-0.269041	0	Negative
Mono/Macro	L1MB2	LINE	-0.249014	0.00460352	Negative
VSMC	L1MB2	LINE	-0.288157	2.52e-15	Negative
DC	L1MB2	LINE	-0.213722	1.18e-24	Negative
CD4 SP	L1MB2	LINE	-0.214383	0	Negative
mTEC	L1MB2	LINE	-0.357188	3.94e-57	Negative
CD4 SP	L1MB3	LINE	-0.21566	0	Negative
Th17	L1MB3	LINE	-0.24874	1.1e-28	Negative
cTEC	L1MB3	LINE	-0.400072	2.2e-215	Negative
VSMC	L1MB3	LINE	-0.297427	2.99e-16	Negative
Treg	L1MB3	LINE	-0.404784	2.79e-30	Negative
CD8 SP	L1MB3	LINE	-0.289112	0	Negative
mTEC	L1MB3	LINE	-0.357476	3.23e-57	Negative
Endothelial	L1MB3	LINE	-0.320975	1.71e-26	Negative
DC	L1MB3	LINE	-0.205294	7.26e-23	Negative
CD4 SP	L1MB4	LINE	-0.207844	0	Negative
mTEC	L1MB4	LINE	-0.328197	3.22e-48	Negative
Endothelial	L1MB4	LINE	-0.269876	3.08e-19	Negative
VSMC	L1MB4	LINE	-0.300249	1.52e-16	Negative
cTEC	L1MB4	LINE	-0.389406	3.22e-203	Negative
CD8 SP	L1MB4	LINE	-0.267567	0	Negative
DC	L1MB4	LINE	-0.210508	5.84e-24	Negative
Treg	L1MB4	LINE	-0.37757	2.86e-26	Negative
Mono/Macro	L1MB4	LINE	-0.2425	0.00577198	Negative
CD8 SP	L1MB5	LINE	-0.25671	0	Negative
cTEC	L1MB5	LINE	-0.385553	6.22e-199	Negative
Endothelial	L1MB5	LINE	-0.275908	5.02e-20	Negative
Treg	L1MB5	LINE	-0.37012	3.15e-25	Negative
Mono/Macro	L1MB5	LINE	-0.235268	0.00692743	Negative
VSMC	L1MB5	LINE	-0.291173	1.31e-15	Negative
Th17	L1MB5	LINE	-0.231104	5.65e-25	Negative
DC	L1MB5	LINE	-0.214116	9.71e-25	Negative
mTEC	L1MB5	LINE	-0.350016	6.57e-55	Negative
cTEC	L1MB7	LINE	-0.426429	2.26e-247	Negative
VSMC	L1MB7	LINE	-0.306331	3.36e-17	Negative
Th17	L1MB7	LINE	-0.228698	1.77e-24	Negative
mTEC	L1MB7	LINE	-0.379926	1.57e-64	Negative
DC	L1MB7	LINE	-0.208997	1.21e-23	Negative
Endothelial	L1MB7	LINE	-0.227724	4.78e-14	Negative
Treg	L1MB7	LINE	-0.399398	1.68e-29	Negative
CD8 SP	L1MB7	LINE	-0.325375	0	Negative
CD4 SP	L1MB7	LINE	-0.236656	0	Negative
Mono/Macro	L1MB7	LINE	-0.313651	0.000387146	Negative
VSMC	L1MB8	LINE	-0.31956	1.3e-18	Negative
CD4 SP	L1MB8	LINE	-0.232898	0	Negative
Th17	L1MB8	LINE	-0.219503	1.16e-22	Negative
Endothelial	L1MB8	LINE	-0.263514	2.14e-18	Negative
mTEC	L1MB8	LINE	-0.372414	4.85e-62	Negative
Treg	L1MB8	LINE	-0.381369	8.39e-27	Negative
DC	L1MB8	LINE	-0.21259	2.03e-24	Negative
cTEC	L1MB8	LINE	-0.427451	1.21e-248	Negative
Mono/Macro	L1MB8	LINE	-0.212395	0.0147663	Negative
CD8 SP	L1MB8	LINE	-0.284805	0	Negative
CD8 SP	L1MC	LINE	-0.22329	0	Negative
mTEC	L1MC	LINE	-0.34633	8.68e-54	Negative
VSMC	L1MC	LINE	-0.26044	1.15e-12	Negative
Treg	L1MC	LINE	-0.328836	6.51e-20	Negative
DC	L1MC	LINE	-0.207674	2.31e-23	Negative
Mono/Macro	L1MC	LINE	-0.270069	0.00228708	Negative
cTEC	L1MC	LINE	-0.342046	2.57e-154	Negative
Endothelial	L1MC	LINE	-0.309278	9.8e-25	Negative
cTEC	L1MC1	LINE	-0.390901	6.77e-205	Negative
B cell	L1MC1	LINE	-0.202274	7e-13	Negative
Treg	L1MC1	LINE	-0.353533	5.26e-23	Negative
DC	L1MC1	LINE	-0.209439	9.86e-24	Negative
mTEC	L1MC1	LINE	-0.355644	1.1e-56	Negative
Th17	L1MC1	LINE	-0.223327	2.05e-23	Negative
VSMC	L1MC1	LINE	-0.297218	3.1e-16	Negative
NK	L1MC1	LINE	-0.237788	3.85e-20	Negative
Endothelial	L1MC1	LINE	-0.285529	2.41e-21	Negative
CD4 SP	L1MC1	LINE	-0.221091	0	Negative
CD8 SP	L1MC1	LINE	-0.268162	0	Negative
DC	L1MC2	LINE	-0.251859	3.97e-33	Negative
Th17	L1MC2	LINE	-0.210917	5.36e-21	Negative
VSMC	L1MC2	LINE	-0.28423	6.27e-15	Negative
CD4 SP	L1MC2	LINE	-0.22634	0	Negative
mTEC	L1MC2	LINE	-0.355007	1.72e-56	Negative
Endothelial	L1MC2	LINE	-0.283105	5.11e-21	Negative
CD8 SP	L1MC2	LINE	-0.258611	0	Negative
cTEC	L1MC2	LINE	-0.338462	6.08e-151	Negative
Treg	L1MC2	LINE	-0.339549	3.17e-21	Negative
NK	L1MC2	LINE	-0.223819	2.82e-18	Negative
Endothelial	L1MC3	LINE	-0.247155	2.45e-16	Negative
mTEC	L1MC3	LINE	-0.332938	1.2e-49	Negative
Th17	L1MC3	LINE	-0.202007	2.4e-19	Negative
CD4 SP	L1MC3	LINE	-0.226817	0	Negative
cTEC	L1MC3	LINE	-0.338257	9.41e-151	Negative
CD8 SP	L1MC3	LINE	-0.263611	0	Negative
VSMC	L1MC3	LINE	-0.308735	1.91e-17	Negative
Treg	L1MC3	LINE	-0.361704	4.41e-24	Negative
CD8 SP	L1MC4	LINE	-0.338018	0	Negative
Th17	L1MC4	LINE	-0.254979	5.12e-30	Negative
Endothelial	L1MC4	LINE	-0.253446	4.06e-17	Negative
DC	L1MC4	LINE	-0.216965	2.38e-25	Negative
cTEC	L1MC4	LINE	-0.422624	1.39e-242	Negative
VSMC	L1MC4	LINE	-0.342192	2.94e-21	Negative
NKT	L1MC4	LINE	-0.231077	7.05e-08	Negative
mTEC	L1MC4	LINE	-0.344183	4.1e-53	Negative
NK	L1MC4	LINE	-0.218836	1.51e-17	Negative
CD4 SP	L1MC4	LINE	-0.249852	0	Negative
Treg	L1MC4	LINE	-0.427675	4.95e-34	Negative
DC	L1MC4a	LINE	-0.203091	1.98e-22	Negative
mTEC	L1MC4a	LINE	-0.349167	1.23e-54	Negative
Endothelial	L1MC4a	LINE	-0.264053	1.82e-18	Negative
cTEC	L1MC4a	LINE	-0.385386	9.38e-199	Negative
CD8 SP	L1MC4a	LINE	-0.213343	0	Negative
VSMC	L1MC4a	LINE	-0.283774	6.83e-15	Negative
Treg	L1MC4a	LINE	-0.336823	7.02e-21	Negative
CD4 SP	L1MC4a	LINE	-0.202697	0	Negative
Mono/Macro	L1MC4a	LINE	-0.223907	0.0099269	Negative
CD8 SP	L1MC5	LINE	-0.289505	0	Negative
mTEC	L1MC5	LINE	-0.345212	1.98e-53	Negative
Treg	L1MC5	LINE	-0.356337	2.24e-23	Negative
VSMC	L1MC5	LINE	-0.325397	3.52e-19	Negative
DC	L1MC5	LINE	-0.218496	1.15e-25	Negative
CD4 SP	L1MC5	LINE	-0.2371	0	Negative
Endothelial	L1MC5	LINE	-0.257642	1.21e-17	Negative
Mono/Macro	L1MC5	LINE	-0.258625	0.00320186	Negative
Th17	L1MC5	LINE	-0.215206	8.06e-22	Negative
B cell	L1MC5	LINE	-0.202644	6.49e-13	Negative
cTEC	L1MC5	LINE	-0.391357	2.09e-205	Negative
Endothelial	L1MC5a	LINE	-0.250477	9.48e-17	Negative
DC	L1MC5a	LINE	-0.205795	5.79e-23	Negative
mTEC	L1MC5a	LINE	-0.328396	2.86e-48	Negative
cTEC	L1MC5a	LINE	-0.383389	1.47e-196	Negative
CD8 SP	L1MC5a	LINE	-0.274854	0	Negative
CD4 SP	L1MC5a	LINE	-0.2441	0	Negative
Th17	L1MC5a	LINE	-0.205686	5.11e-20	Negative
NKT	L1MC5a	LINE	-0.206154	1.2e-06	Negative
VSMC	L1MC5a	LINE	-0.28961	1.83e-15	Negative
Mono/Macro	L1MC5a	LINE	-0.261883	0.00308923	Negative
Treg	L1MC5a	LINE	-0.368197	5.84e-25	Negative
CD4 SP	L1MCa	LINE	-0.202919	0	Negative
mTEC	L1MCa	LINE	-0.363243	4.2e-59	Negative
VSMC	L1MCa	LINE	-0.308564	1.96e-17	Negative
Endothelial	L1MCa	LINE	-0.271605	1.86e-19	Negative
cTEC	L1MCa	LINE	-0.388867	1.28e-202	Negative
Th17	L1MCa	LINE	-0.23604	5.41e-26	Negative
CD8 SP	L1MCa	LINE	-0.212565	0	Negative
Treg	L1MCa	LINE	-0.365043	1.54e-24	Negative
Mono/Macro	L1MCa	LINE	-0.311304	0.000400835	Negative
Mono/Macro	L1MCb	LINE	-0.23692	0.00665396	Negative
Treg	L1MCb	LINE	-0.259859	1.48e-12	Negative
Endothelial	L1MCb	LINE	-0.216265	8.7e-13	Negative
cTEC	L1MCb	LINE	-0.327491	7.3e-141	Negative
mTEC	L1MCb	LINE	-0.287402	6.09e-37	Negative
mTEC	L1MCc	LINE	-0.294839	7.15e-39	Negative
VSMC	L1MCc	LINE	-0.223412	1.64e-09	Negative
cTEC	L1MCc	LINE	-0.299951	2.28e-117	Negative
Endothelial	L1MCc	LINE	-0.223448	1.44e-13	Negative
Treg	L1MD	LINE	-0.37737	3.01e-26	Negative
VSMC	L1MD	LINE	-0.227055	8.63e-10	Negative
CD4 SP	L1MD	LINE	-0.218154	0	Negative
Th17	L1MD	LINE	-0.24148	4.01e-27	Negative
CD8 SP	L1MD	LINE	-0.240307	0	Negative
cTEC	L1MD	LINE	-0.34952	1.74e-161	Negative
gd T	L1MD	LINE	0.268316	5.44e-05	Positive
DC	L1MD	LINE	-0.218272	1.26e-25	Negative
Endothelial	L1MD	LINE	-0.284034	3.81e-21	Negative
mTEC	L1MD	LINE	-0.310343	4.27e-43	Negative
Endothelial	L1MD1	LINE	-0.267319	6.69e-19	Negative
cTEC	L1MD1	LINE	-0.297872	1.07e-115	Negative
Th17	L1MD1	LINE	-0.201668	2.71e-19	Negative
mTEC	L1MD1	LINE	-0.29314	2.02e-38	Negative
CD4 SP	L1MD1	LINE	-0.204341	5.92469517955059e-314	Negative
CD8 SP	L1MD1	LINE	-0.273375	0	Negative
Treg	L1MD1	LINE	-0.367565	6.97e-25	Negative
Mono/Macro	L1MD1	LINE	-0.21688	0.0124687	Negative
VSMC	L1MD1	LINE	-0.251203	7.99e-12	Negative
cTEC	L1MD2	LINE	-0.308199	3.72e-124	Negative
Endothelial	L1MD2	LINE	-0.262652	2.74e-18	Negative
CD8 SP	L1MD2	LINE	-0.332567	0	Negative
CD4 SP	L1MD2	LINE	-0.27893	0	Negative
VSMC	L1MD2	LINE	-0.31107	1.11e-17	Negative
B cell	L1MD2	LINE	-0.216097	1.9e-14	Negative
Treg	L1MD2	LINE	-0.429617	2.44e-34	Negative
NK	L1MD2	LINE	-0.210827	2.04e-16	Negative
Th17	L1MD2	LINE	-0.251522	2.77e-29	Negative
NKT	L1MD2	LINE	-0.222214	1.76e-07	Negative
mTEC	L1MD2	LINE	-0.277777	1.61e-34	Negative
NKT	L1MD3	LINE	-0.269192	4.61e-10	Negative
mTEC	L1MD3	LINE	-0.337687	4.5e-51	Negative
Th17	L1MD3	LINE	-0.210605	6.1e-21	Negative
NK	L1MD3	LINE	-0.206188	7.93e-16	Negative
Mono/Macro	L1MD3	LINE	-0.278742	0.00155822	Negative
cTEC	L1MD3	LINE	-0.356083	5.76e-168	Negative
Treg	L1MD3	LINE	-0.339838	2.95e-21	Negative
CD8 SP	L1MD3	LINE	-0.251264	0	Negative
DC	L1MD3	LINE	-0.233789	4.75e-29	Negative
VSMC	L1MD3	LINE	-0.269396	1.7e-13	Negative
CD4 SP	L1MD3	LINE	-0.222958	0	Negative
Endothelial	L1MD3	LINE	-0.273456	1.06e-19	Negative
Endothelial	L1MDa	LINE	-0.306002	2.83e-24	Negative
Mono/Macro	L1MDa	LINE	-0.387275	5.19e-06	Negative
CD4 SP	L1MDa	LINE	-0.216753	0	Negative
VSMC	L1MDa	LINE	-0.282033	1.02e-14	Negative
cTEC	L1MDa	LINE	-0.404788	6.63e-221	Negative
CD8 SP	L1MDa	LINE	-0.252539	0	Negative
DC	L1MDa	LINE	-0.205752	5.87e-23	Negative
Treg	L1MDa	LINE	-0.345151	6.42e-22	Negative
mTEC	L1MDa	LINE	-0.338077	3.43e-51	Negative
cTEC	L1MDb	LINE	-0.240546	7.14e-75	Negative
Mono/Macro	L1MDb	LINE	-0.251774	0.00419411	Negative
mTEC	L1MDb	LINE	-0.20646	2.03e-19	Negative
mTEC	L1ME1	LINE	-0.34711	4.89e-54	Negative
CD8 SP	L1ME1	LINE	-0.324309	0	Negative
VSMC	L1ME1	LINE	-0.323937	4.81e-19	Negative
NK	L1ME1	LINE	-0.210935	2.04e-16	Negative
Endothelial	L1ME1	LINE	-0.248705	1.57e-16	Negative
Treg	L1ME1	LINE	-0.401414	8.56e-30	Negative
DC	L1ME1	LINE	-0.203369	1.74e-22	Negative
Mono/Macro	L1ME1	LINE	-0.283656	0.00132612	Negative
cTEC	L1ME1	LINE	-0.444871	2.74e-271	Negative
CD4 SP	L1ME1	LINE	-0.241135	0	Negative
Th17	L1ME1	LINE	-0.258796	8.03e-31	Negative
NKT	L1ME1	LINE	-0.220179	2.08e-07	Negative
Treg	L1ME2	LINE	-0.396952	3.68e-29	Negative
VSMC	L1ME2	LINE	-0.250471	9.16e-12	Negative
Mono/Macro	L1ME2	LINE	-0.237014	0.00665396	Negative
cTEC	L1ME2	LINE	-0.434671	6.11e-258	Negative
Endothelial	L1ME2	LINE	-0.275192	6.15e-20	Negative
Th17	L1ME2	LINE	-0.206331	3.88e-20	Negative
DC	L1ME2	LINE	-0.204486	1.05e-22	Negative
CD8 SP	L1ME2	LINE	-0.249551	0	Negative
CD4 SP	L1ME2	LINE	-0.206905	5.53353523342196e-322	Negative
mTEC	L1ME2	LINE	-0.353073	6.93e-56	Negative
DC	L1ME2z	LINE	-0.203448	1.69e-22	Negative
VSMC	L1ME2z	LINE	-0.24965	1.08e-11	Negative
Endothelial	L1ME2z	LINE	-0.249782	1.15e-16	Negative
Mono/Macro	L1ME2z	LINE	-0.214514	0.0137221	Negative
mTEC	L1ME2z	LINE	-0.350144	6.07e-55	Negative
cTEC	L1ME2z	LINE	-0.342055	2.54e-154	Negative
CD8 SP	L1ME3	LINE	-0.255117	0	Negative
cTEC	L1ME3	LINE	-0.365939	5.47e-178	Negative
DC	L1ME3	LINE	-0.227856	9.42e-28	Negative
CD4 SP	L1ME3	LINE	-0.231023	0	Negative
mTEC	L1ME3	LINE	-0.326423	1.08e-47	Negative
Endothelial	L1ME3	LINE	-0.241872	1.09e-15	Negative
B cell	L1ME3	LINE	-0.217418	1.55e-14	Negative
Th17	L1ME3	LINE	-0.226311	5.41e-24	Negative
Treg	L1ME3	LINE	-0.333828	1.61e-20	Negative
VSMC	L1ME3	LINE	-0.221796	2.16e-09	Negative
cTEC	L1ME3A	LINE	-0.387439	5.09e-201	Negative
mTEC	L1ME3A	LINE	-0.366436	4.1e-60	Negative
CD8 SP	L1ME3A	LINE	-0.239188	0	Negative
CD4 SP	L1ME3A	LINE	-0.218548	0	Negative
Mono/Macro	L1ME3A	LINE	-0.225783	0.00919885	Negative
NK	L1ME3A	LINE	-0.218856	1.51e-17	Negative
VSMC	L1ME3A	LINE	-0.30336	7.23e-17	Negative
Treg	L1ME3A	LINE	-0.359043	9.77e-24	Negative
DC	L1ME3A	LINE	-0.20175	3.73e-22	Negative
Th17	L1ME3A	LINE	-0.211591	3.99e-21	Negative
Endothelial	L1ME3A	LINE	-0.242301	9.63e-16	Negative
DC	L1ME3B	LINE	-0.218177	1.3e-25	Negative
Treg	L1ME3B	LINE	-0.367914	6.32e-25	Negative
Endothelial	L1ME3B	LINE	-0.307042	1.98e-24	Negative
VSMC	L1ME3B	LINE	-0.311708	9.53e-18	Negative
cTEC	L1ME3B	LINE	-0.38477	4.4e-198	Negative
mTEC	L1ME3B	LINE	-0.375948	3.59e-63	Negative
Th17	L1ME3B	LINE	-0.237938	2.14e-26	Negative
Mono/Macro	L1ME3B	LINE	-0.213458	0.0142441	Negative
B cell	L1ME3B	LINE	-0.209907	9.5e-14	Negative
CD8 SP	L1ME3B	LINE	-0.267408	0	Negative
CD4 SP	L1ME3B	LINE	-0.235183	0	Negative
Mono/Macro	L1ME3C	LINE	-0.233084	0.00743378	Negative
mTEC	L1ME3C	LINE	-0.291733	4.65e-38	Negative
Endothelial	L1ME3C	LINE	-0.277965	2.67e-20	Negative
VSMC	L1ME3C	LINE	-0.219636	3.15e-09	Negative
DC	L1ME3C	LINE	-0.241182	9.81e-31	Negative
Treg	L1ME3C	LINE	-0.224335	1.6e-09	Negative
cTEC	L1ME3C	LINE	-0.341129	1.89e-153	Negative
CD8 SP	L1ME3C	LINE	-0.211337	0	Negative
Treg	L1ME3Cz	LINE	-0.332959	2.05e-20	Negative
Endothelial	L1ME3Cz	LINE	-0.241121	1.33e-15	Negative
CD8 SP	L1ME3Cz	LINE	-0.238169	0	Negative
VSMC	L1ME3Cz	LINE	-0.300259	1.52e-16	Negative
Th17	L1ME3Cz	LINE	-0.204284	9.17e-20	Negative
mTEC	L1ME3Cz	LINE	-0.352675	9.24e-56	Negative
cTEC	L1ME3Cz	LINE	-0.375819	2.21e-188	Negative
mTEC	L1ME3D	LINE	-0.297483	1.44e-39	Negative
Endothelial	L1ME3D	LINE	-0.268319	4.88e-19	Negative
cTEC	L1ME3D	LINE	-0.279027	3.72e-101	Negative
CD4 SP	L1ME3D	LINE	-0.213068	0	Negative
CD8 SP	L1ME3D	LINE	-0.218626	0	Negative
Treg	L1ME3D	LINE	-0.304017	4.95e-17	Negative
VSMC	L1ME3D	LINE	-0.210805	1.46e-08	Negative
mTEC	L1ME3E	LINE	-0.311842	1.68e-43	Negative
Treg	L1ME3E	LINE	-0.342078	1.58e-21	Negative
Endothelial	L1ME3E	LINE	-0.255714	2.08e-17	Negative
CD4 SP	L1ME3E	LINE	-0.203322	8.62914463548571e-311	Negative
VSMC	L1ME3E	LINE	-0.220421	2.74e-09	Negative
DC	L1ME3E	LINE	-0.242655	5.56e-31	Negative
cTEC	L1ME3E	LINE	-0.350945	7.11e-163	Negative
mTEC	L1ME3F	LINE	-0.326096	1.34e-47	Negative
Mono/Macro	L1ME3F	LINE	-0.277767	0.00161451	Negative
cTEC	L1ME3F	LINE	-0.341041	2.27e-153	Negative
DC	L1ME3F	LINE	-0.227437	1.14e-27	Negative
Th17	L1ME3F	LINE	-0.204378	8.9e-20	Negative
Treg	L1ME3F	LINE	-0.295568	4.1e-16	Negative
NKT	L1ME3F	LINE	-0.218524	2.58e-07	Negative
Endothelial	L1ME3F	LINE	-0.272338	1.49e-19	Negative
Mono/Macro	L1ME3G	LINE	-0.239736	0.00611299	Negative
Th17	L1ME3G	LINE	-0.215162	8.11e-22	Negative
mTEC	L1ME3G	LINE	-0.354341	2.83e-56	Negative
Treg	L1ME3G	LINE	-0.317603	1.4e-18	Negative
VSMC	L1ME3G	LINE	-0.290132	1.67e-15	Negative
Endothelial	L1ME3G	LINE	-0.272883	1.27e-19	Negative
CD8 SP	L1ME3G	LINE	-0.284268	0	Negative
CD4 SP	L1ME3G	LINE	-0.23104	0	Negative
DC	L1ME3G	LINE	-0.200282	7.48e-22	Negative
cTEC	L1ME3G	LINE	-0.398701	8.06e-214	Negative
cTEC	L1ME4a	LINE	-0.425952	8.8e-247	Negative
CD8 SP	L1ME4a	LINE	-0.276699	0	Negative
Endothelial	L1ME4a	LINE	-0.274554	7.44e-20	Negative
Treg	L1ME4a	LINE	-0.404103	3.5e-30	Negative
NKT	L1ME4a	LINE	-0.255713	2.41e-09	Negative
DC	L1ME4a	LINE	-0.20483	9.02e-23	Negative
CD4 SP	L1ME4a	LINE	-0.22764	0	Negative
Th17	L1ME4a	LINE	-0.203234	1.42e-19	Negative
mTEC	L1ME4a	LINE	-0.36694	2.85e-60	Negative
VSMC	L1ME4a	LINE	-0.320806	1.03e-18	Negative
cTEC	L1ME4b	LINE	-0.403094	6.34e-219	Negative
CD8 SP	L1ME4b	LINE	-0.285804	0	Negative
Treg	L1ME4b	LINE	-0.425955	9.31e-34	Negative
NK	L1ME4b	LINE	-0.211068	2.04e-16	Negative
NKT	L1ME4b	LINE	-0.214657	4.27e-07	Negative
Th17	L1ME4b	LINE	-0.226246	5.48e-24	Negative
mTEC	L1ME4b	LINE	-0.363575	3.34e-59	Negative
CD4 SP	L1ME4b	LINE	-0.238913	0	Negative
VSMC	L1ME4b	LINE	-0.322548	6.47e-19	Negative
DC	L1ME4b	LINE	-0.212672	1.97e-24	Negative
Endothelial	L1ME4b	LINE	-0.291824	3.22e-22	Negative
cTEC	L1ME4c	LINE	-0.36507	4.31e-177	Negative
Endothelial	L1ME4c	LINE	-0.289555	6.57e-22	Negative
Mono/Macro	L1ME4c	LINE	-0.226541	0.00900732	Negative
CD8 SP	L1ME4c	LINE	-0.226367	0	Negative
DC	L1ME4c	LINE	-0.204586	1e-22	Negative
VSMC	L1ME4c	LINE	-0.239018	9.15e-11	Negative
Treg	L1ME4c	LINE	-0.274266	6.17e-14	Negative
mTEC	L1ME4c	LINE	-0.333268	9.66e-50	Negative
cTEC	L1ME5	LINE	-0.327461	7.73e-141	Negative
Mono/Macro	L1ME5	LINE	-0.275484	0.00176989	Negative
Treg	L1ME5	LINE	-0.211339	1.53e-08	Negative
B_pro/pre	L1ME5	LINE	-0.289629	0.0487157	Negative
Endothelial	L1ME5	LINE	-0.308269	1.38e-24	Negative
mTEC	L1ME5	LINE	-0.292739	2.53e-38	Negative
Mono/Macro	L1MEa	LINE	-0.226019	0.00916383	Negative
cTEC	L1MEa	LINE	-0.214033	2.74e-59	Negative
mTEC	L1MEb	LINE	-0.263015	5.58e-31	Negative
Endothelial	L1MEb	LINE	-0.227742	4.78e-14	Negative
cTEC	L1MEb	LINE	-0.287294	2.15e-107	Negative
Treg	L1MEb	LINE	-0.276582	3.72e-14	Negative
Endothelial	L1MEc	LINE	-0.290941	4.25e-22	Negative
CD8 SP	L1MEc	LINE	-0.296876	0	Negative
Treg	L1MEc	LINE	-0.397114	3.54e-29	Negative
cTEC	L1MEc	LINE	-0.438551	5e-263	Negative
Mono/Macro	L1MEc	LINE	-0.229635	0.00831326	Negative
CD4 SP	L1MEc	LINE	-0.227797	0	Negative
VSMC	L1MEc	LINE	-0.31463	4.5e-18	Negative
mTEC	L1MEc	LINE	-0.366021	5.25e-60	Negative
Th17	L1MEc	LINE	-0.225929	6.22e-24	Negative
NK	L1MEc	LINE	-0.217363	2.51e-17	Negative
DC	L1MEd	LINE	-0.223618	8.21e-27	Negative
CD8 SP	L1MEd	LINE	-0.317886	0	Negative
Th17	L1MEd	LINE	-0.289609	6.05e-38	Negative
Endothelial	L1MEd	LINE	-0.221739	2.22e-13	Negative
CD4 SP	L1MEd	LINE	-0.244226	0	Negative
cTEC	L1MEd	LINE	-0.427175	2.61e-248	Negative
mTEC	L1MEd	LINE	-0.365495	7.42e-60	Negative
Treg	L1MEd	LINE	-0.428179	4.22e-34	Negative
NK	L1MEd	LINE	-0.234795	6.62e-20	Negative
VSMC	L1MEd	LINE	-0.318864	1.54e-18	Negative
NK	L1MEf	LINE	-0.200976	3.36e-15	Negative
Endothelial	L1MEf	LINE	-0.284389	3.42e-21	Negative
CD8 SP	L1MEf	LINE	-0.274921	0	Negative
cTEC	L1MEf	LINE	-0.414753	6.25e-233	Negative
mTEC	L1MEf	LINE	-0.36623	4.63e-60	Negative
VSMC	L1MEf	LINE	-0.310519	1.23e-17	Negative
CD4 SP	L1MEf	LINE	-0.21514	0	Negative
Treg	L1MEf	LINE	-0.403735	3.91e-30	Negative
CD4 SP	L1MEg	LINE	-0.23113	0	Negative
Treg	L1MEg	LINE	-0.438352	7.57e-36	Negative
NK	L1MEg	LINE	-0.244972	2.47e-21	Negative
Th17	L1MEg	LINE	-0.222505	2.99e-23	Negative
Mono/Macro	L1MEg	LINE	-0.313344	0.000387146	Negative
cTEC	L1MEg	LINE	-0.434978	2.58e-258	Negative
NKT	L1MEg	LINE	-0.212213	5.64e-07	Negative
mTEC	L1MEg	LINE	-0.354001	3.6e-56	Negative
Endothelial	L1MEg	LINE	-0.28545	2.44e-21	Negative
VSMC	L1MEg	LINE	-0.343358	2.19e-21	Negative
CD8 SP	L1MEg	LINE	-0.282929	0	Negative
B cell	L1MEg	LINE	-0.215156	2.26e-14	Negative
cTEC	L1MEg1	LINE	-0.269855	1.79e-94	Negative
Treg	L1MEg1	LINE	-0.256231	3.19e-12	Negative
mTEC	L1MEg1	LINE	-0.239667	8.01e-26	Negative
cTEC	L1MEg2	LINE	-0.240751	5.34e-75	Negative
mTEC	L1MEg2	LINE	-0.219922	6.98e-22	Negative
Endothelial	L1MEh	LINE	-0.241029	1.35e-15	Negative
Treg	L1MEh	LINE	-0.23615	1.76e-10	Negative
Mono/Macro	L1MEh	LINE	-0.244843	0.00540777	Negative
DC	L1MEh	LINE	-0.215217	5.75e-25	Negative
cTEC	L1MEh	LINE	-0.326421	6.5e-140	Negative
VSMC	L1MEh	LINE	-0.205475	3.52e-08	Negative
mTEC	L1MEh	LINE	-0.302324	6.97e-41	Negative
mTEC	L1MEi	LINE	-0.348407	2.01e-54	Negative
DC	L1MEi	LINE	-0.244613	2.06e-31	Negative
Treg	L1MEi	LINE	-0.289648	1.72e-15	Negative
cTEC	L1MEi	LINE	-0.382211	2.89e-195	Negative
Endothelial	L1MEi	LINE	-0.312756	3.07e-25	Negative
VSMC	L1MEi	LINE	-0.213368	9.39e-09	Negative
Mono/Macro	L1MEi	LINE	-0.333954	0.000159535	Negative
CD8 SP	L1MEi	LINE	-0.20565	1.84531683173959e-313	Negative
Endothelial	L1MEj	LINE	-0.263059	2.43e-18	Negative
NK	L1MEj	LINE	-0.20508	1.07e-15	Negative
Treg	L1MEj	LINE	-0.219213	4.01e-09	Negative
mTEC	L1MEj	LINE	-0.287632	5.33e-37	Negative
cTEC	L1MEj	LINE	-0.326563	4.91e-140	Negative
Endothelial	L1P1	LINE	-0.221118	2.6e-13	Negative
VSMC	L1P1	LINE	-0.223918	1.51e-09	Negative
Mono/Macro	L1P1	LINE	-0.368735	2.06e-05	Negative
DC	L1P1	LINE	-0.238408	4.13e-30	Negative
cTEC	L1P1	LINE	-0.363048	5.12e-175	Negative
mTEC	L1P1	LINE	-0.306171	6.18e-42	Negative
Treg	L1P1	LINE	-0.254413	4.63e-12	Negative
Treg	L1P2	LINE	-0.217482	5.44e-09	Negative
VSMC	L1P2	LINE	-0.214985	7.12e-09	Negative
cTEC	L1P2	LINE	-0.345754	7.6e-158	Negative
Endothelial	L1P2	LINE	-0.277896	2.69e-20	Negative
mTEC	L1P2	LINE	-0.314195	3.64e-44	Negative
Endothelial	L1P3	LINE	-0.2756	5.43e-20	Negative
VSMC	L1P3	LINE	-0.23087	4.22e-10	Negative
mTEC	L1P3	LINE	-0.307115	3.44e-42	Negative
cTEC	L1P3	LINE	-0.335231	6.25e-148	Negative
Mono/Macro	L1P3	LINE	-0.260382	0.00314275	Negative
Treg	L1P3	LINE	-0.299696	1.47e-16	Negative
DC	L1P3	LINE	-0.210143	6.99e-24	Negative
Endothelial	L1P4	LINE	-0.237068	4.08e-15	Negative
mTEC	L1P4	LINE	-0.286469	1.05e-36	Negative
VSMC	L1P4	LINE	-0.234155	2.29e-10	Negative
Treg	L1P4	LINE	-0.236337	1.71e-10	Negative
Mono/Macro	L1P4	LINE	-0.246075	0.00512643	Negative
cTEC	L1P4	LINE	-0.324968	1.29e-138	Negative
cTEC	L1P4a	LINE	-0.220978	3.6e-63	Negative
Th17	L1PA10	LINE	-0.224694	1.09e-23	Negative
CD4 SP	L1PA10	LINE	-0.222385	0	Negative
cTEC	L1PA10	LINE	-0.312514	8.74e-128	Negative
mTEC	L1PA10	LINE	-0.303349	3.69e-41	Negative
B cell	L1PA10	LINE	-0.216401	1.84e-14	Negative
Endothelial	L1PA10	LINE	-0.344924	1.82e-30	Negative
CD8 SP	L1PA10	LINE	-0.238489	0	Negative
Mono/Macro	L1PA10	LINE	-0.232489	0.00752505	Negative
VSMC	L1PA10	LINE	-0.293475	7.8e-16	Negative
Treg	L1PA10	LINE	-0.400006	1.37e-29	Negative
VSMC	L1PA11	LINE	-0.289548	1.83e-15	Negative
cTEC	L1PA11	LINE	-0.359728	1.24e-171	Negative
mTEC	L1PA11	LINE	-0.339877	9.55e-52	Negative
Mono/Macro	L1PA11	LINE	-0.282873	0.00133804	Negative
NK	L1PA11	LINE	-0.230179	3.12e-19	Negative
Treg	L1PA11	LINE	-0.296029	3.68e-16	Negative
CD8 SP	L1PA11	LINE	-0.218509	0	Negative
Th17	L1PA11	LINE	-0.209548	9.74e-21	Negative
Endothelial	L1PA11	LINE	-0.256371	1.74e-17	Negative
NK	L1PA12	LINE	-0.200092	4.48e-15	Negative
DC	L1PA12	LINE	-0.203083	1.98e-22	Negative
Treg	L1PA12	LINE	-0.275525	4.68e-14	Negative
cTEC	L1PA12	LINE	-0.311226	1.07e-126	Negative
Endothelial	L1PA12	LINE	-0.288022	1.05e-21	Negative
mTEC	L1PA12	LINE	-0.283141	7.4e-36	Negative
DC	L1PA13	LINE	-0.200663	6.29e-22	Negative
mTEC	L1PA13	LINE	-0.356603	6.05e-57	Negative
Mono/Macro	L1PA13	LINE	-0.2905	0.000986576	Negative
CD8 SP	L1PA13	LINE	-0.218196	0	Negative
Endothelial	L1PA13	LINE	-0.25589	2e-17	Negative
NK	L1PA13	LINE	-0.210594	2.06e-16	Negative
Treg	L1PA13	LINE	-0.323456	2.86e-19	Negative
VSMC	L1PA13	LINE	-0.279164	1.98e-14	Negative
cTEC	L1PA13	LINE	-0.371663	5.7e-184	Negative
NK	L1PA14	LINE	-0.228416	5.79e-19	Negative
Treg	L1PA14	LINE	-0.329083	6.13e-20	Negative
Mono/Macro	L1PA14	LINE	-0.243939	0.00547486	Negative
mTEC	L1PA14	LINE	-0.316488	8.14e-45	Negative
Endothelial	L1PA14	LINE	-0.261993	3.33e-18	Negative
cTEC	L1PA14	LINE	-0.348061	4.5e-160	Negative
VSMC	L1PA14	LINE	-0.265571	3.86e-13	Negative
Endothelial	L1PA15	LINE	-0.206321	9.81e-12	Negative
NK	L1PA15	LINE	-0.236569	4.25e-20	Negative
CD4 SP	L1PA15	LINE	-0.2144	0	Negative
Treg	L1PA15	LINE	-0.347647	3.11e-22	Negative
DC	L1PA15	LINE	-0.236785	9.42e-30	Negative
VSMC	L1PA15	LINE	-0.258232	1.84e-12	Negative
cTEC	L1PA15	LINE	-0.402286	5.58e-218	Negative
Th17	L1PA15	LINE	-0.220572	7.1e-23	Negative
mTEC	L1PA15	LINE	-0.334628	3.76e-50	Negative
CD8 SP	L1PA15	LINE	-0.256946	0	Negative
Mono/Macro	L1PA15	LINE	-0.2469	0.00503732	Negative
Endothelial	L1PA15-16	LINE	-0.222357	1.9e-13	Negative
mTEC	L1PA15-16	LINE	-0.301595	1.1e-40	Negative
cTEC	L1PA15-16	LINE	-0.343304	1.69e-155	Negative
CD8 SP	L1PA16	LINE	-0.255108	0	Negative
Endothelial	L1PA16	LINE	-0.289485	6.61e-22	Negative
Mono/Macro	L1PA16	LINE	-0.414604	8.14e-07	Negative
Th17	L1PA16	LINE	-0.239183	1.22e-26	Negative
mTEC	L1PA16	LINE	-0.381611	5e-65	Negative
VSMC	L1PA16	LINE	-0.322914	6.16e-19	Negative
DC	L1PA16	LINE	-0.225142	3.7e-27	Negative
NK	L1PA16	LINE	-0.202362	2.28e-15	Negative
Treg	L1PA16	LINE	-0.355084	3.28e-23	Negative
cTEC	L1PA16	LINE	-0.416435	6.05e-235	Negative
cTEC	L1PA17	LINE	-0.376157	9.69e-189	Negative
DC	L1PA17	LINE	-0.201026	5.3e-22	Negative
Treg	L1PA17	LINE	-0.335202	1.1e-20	Negative
CD8 SP	L1PA17	LINE	-0.200176	9.58e-297	Negative
VSMC	L1PA17	LINE	-0.247948	1.53e-11	Negative
Endothelial	L1PA17	LINE	-0.314196	1.95e-25	Negative
mTEC	L1PA17	LINE	-0.330604	6.12e-49	Negative
VSMC	L1PA2	LINE	-0.287394	2.96e-15	Negative
CD8 SP	L1PA2	LINE	-0.276442	0	Negative
cTEC	L1PA2	LINE	-0.381058	5.06e-194	Negative
Mono/Macro	L1PA2	LINE	-0.311657	0.000400835	Negative
mTEC	L1PA2	LINE	-0.281204	2.27e-35	Negative
DC	L1PA2	LINE	-0.261446	1.6e-35	Negative
Treg	L1PA2	LINE	-0.359502	8.67e-24	Negative
NK	L1PA2	LINE	-0.220871	7.78e-18	Negative
Endothelial	L1PA2	LINE	-0.302734	8.59e-24	Negative
CD4 SP	L1PA3	LINE	-0.219302	0	Negative
CD8 SP	L1PA3	LINE	-0.268558	0	Negative
Treg	L1PA3	LINE	-0.380467	1.12e-26	Negative
mTEC	L1PA3	LINE	-0.319811	9.14e-46	Negative
DC	L1PA3	LINE	-0.223484	8.7e-27	Negative
VSMC	L1PA3	LINE	-0.348891	4.55e-22	Negative
cTEC	L1PA3	LINE	-0.412294	6.16e-230	Negative
Endothelial	L1PA3	LINE	-0.270572	2.53e-19	Negative
NK	L1PA3	LINE	-0.233656	9.37e-20	Negative
Th17	L1PA3	LINE	-0.260072	5.32e-31	Negative
Mono/Macro	L1PA3	LINE	-0.350914	4.85e-05	Negative
CD8 SP	L1PA4	LINE	-0.269712	0	Negative
CD4 SP	L1PA4	LINE	-0.204972	6.33326990709792e-316	Negative
B cell	L1PA4	LINE	-0.207148	2.03e-13	Negative
Mono/Macro	L1PA4	LINE	-0.315258	0.000387146	Negative
VSMC	L1PA4	LINE	-0.298198	2.49e-16	Negative
mTEC	L1PA4	LINE	-0.339507	1.24e-51	Negative
Treg	L1PA4	LINE	-0.416442	3.6e-32	Negative
DC	L1PA4	LINE	-0.24279	5.55e-31	Negative
cTEC	L1PA4	LINE	-0.441209	1.65e-266	Negative
NK	L1PA4	LINE	-0.224492	2.33e-18	Negative
Endothelial	L1PA4	LINE	-0.259423	7.13e-18	Negative
CD4 SP	L1PA5	LINE	-0.245949	0	Negative
Mono/Macro	L1PA5	LINE	-0.434728	2.15e-07	Negative
DC	L1PA5	LINE	-0.226194	2.17e-27	Negative
CD8 SP	L1PA5	LINE	-0.312994	0	Negative
Treg	L1PA5	LINE	-0.440655	3.01e-36	Negative
Endothelial	L1PA5	LINE	-0.235014	7.06e-15	Negative
VSMC	L1PA5	LINE	-0.308781	1.91e-17	Negative
mTEC	L1PA5	LINE	-0.356452	6.63e-57	Negative
Th17	L1PA5	LINE	-0.261051	3.46e-31	Negative
NK	L1PA5	LINE	-0.23587	4.86e-20	Negative
cTEC	L1PA5	LINE	-0.42913	8.76e-251	Negative
mTEC	L1PA6	LINE	-0.361048	2.25e-58	Negative
Treg	L1PA6	LINE	-0.359211	9.38e-24	Negative
CD8 SP	L1PA6	LINE	-0.286076	0	Negative
VSMC	L1PA6	LINE	-0.273334	7.14e-14	Negative
Mono/Macro	L1PA6	LINE	-0.299605	0.000626882	Negative
cTEC	L1PA6	LINE	-0.40322	4.6e-219	Negative
Endothelial	L1PA6	LINE	-0.292573	2.63e-22	Negative
CD4 SP	L1PA7	LINE	-0.219205	0	Negative
VSMC	L1PA7	LINE	-0.310742	1.19e-17	Negative
CD8 SP	L1PA7	LINE	-0.326248	0	Negative
Treg	L1PA7	LINE	-0.43338	5.47e-35	Negative
cTEC	L1PA7	LINE	-0.440927	3.53e-266	Negative
mTEC	L1PA7	LINE	-0.344313	3.77e-53	Negative
Th17	L1PA7	LINE	-0.21884	1.57e-22	Negative
Endothelial	L1PA7	LINE	-0.316326	8.94e-26	Negative
Mono/Macro	L1PA7	LINE	-0.289814	0.0009991	Negative
cTEC	L1PA8	LINE	-0.408244	4.93e-225	Negative
VSMC	L1PA8	LINE	-0.287223	3.05e-15	Negative
Endothelial	L1PA8	LINE	-0.29446	1.42e-22	Negative
Mono/Macro	L1PA8	LINE	-0.283451	0.00132612	Negative
CD4 SP	L1PA8	LINE	-0.234349	0	Negative
CD8 SP	L1PA8	LINE	-0.303147	0	Negative
Treg	L1PA8	LINE	-0.315562	2.4e-18	Negative
mTEC	L1PA8	LINE	-0.348906	1.45e-54	Negative
cTEC	L1PA8A	LINE	-0.325646	3.2e-139	Negative
mTEC	L1PA8A	LINE	-0.311746	1.78e-43	Negative
Endothelial	L1PA8A	LINE	-0.302711	8.59e-24	Negative
Mono/Macro	L1PA8A	LINE	-0.256689	0.00341737	Negative
Treg	L1PA8A	LINE	-0.255756	3.5e-12	Negative
VSMC	L1PA8A	LINE	-0.289196	1.97e-15	Negative
cTEC	L1PB	LINE	-0.272058	4.7e-96	Negative
Mono/Macro	L1PB	LINE	-0.236588	0.00670254	Negative
Endothelial	L1PB	LINE	-0.235313	6.56e-15	Negative
mTEC	L1PB	LINE	-0.248463	1.07e-27	Negative
Treg	L1PB1	LINE	-0.397527	3.11e-29	Negative
CD8 SP	L1PB1	LINE	-0.249016	0	Negative
Endothelial	L1PB1	LINE	-0.270499	2.56e-19	Negative
DC	L1PB1	LINE	-0.20898	1.21e-23	Negative
VSMC	L1PB1	LINE	-0.291448	1.24e-15	Negative
Mono/Macro	L1PB1	LINE	-0.331266	0.000176868	Negative
mTEC	L1PB1	LINE	-0.389168	1.09e-67	Negative
cTEC	L1PB1	LINE	-0.445125	1.44e-271	Negative
NK	L1PB1	LINE	-0.209438	3.02e-16	Negative
Th17	L1PB1	LINE	-0.237839	2.19e-26	Negative
mTEC	L1PB2	LINE	-0.255015	3.71e-29	Negative
CD4 SP	L1PB2	LINE	-0.211235	0	Negative
CD8 SP	L1PB2	LINE	-0.237256	0	Negative
Mono/Macro	L1PB2	LINE	-0.298209	0.000663129	Negative
Endothelial	L1PB2	LINE	-0.252354	5.59e-17	Negative
VSMC	L1PB2	LINE	-0.289835	1.75e-15	Negative
cTEC	L1PB2	LINE	-0.239696	2.43e-74	Negative
Treg	L1PB2	LINE	-0.291265	1.18e-15	Negative
cTEC	L1PB3	LINE	-0.377608	2.72e-190	Negative
Treg	L1PB3	LINE	-0.252714	6.58e-12	Negative
mTEC	L1PB3	LINE	-0.32526	2.37e-47	Negative
Mono/Macro	L1PB3	LINE	-0.392179	4.46e-06	Negative
CD8 SP	L1PB3	LINE	-0.210095	0	Negative
VSMC	L1PB3	LINE	-0.22554	1.13e-09	Negative
Endothelial	L1PB3	LINE	-0.283349	4.76e-21	Negative
Mono/Macro	L1PB4	LINE	-0.211858	0.0149405	Negative
Endothelial	L1PB4	LINE	-0.271163	2.1e-19	Negative
Treg	L1PB4	LINE	-0.327032	1.07e-19	Negative
Th17	L1PB4	LINE	-0.207494	2.34e-20	Negative
DC	L1PB4	LINE	-0.221818	2.15e-26	Negative
cTEC	L1PB4	LINE	-0.399191	2.25e-214	Negative
VSMC	L1PB4	LINE	-0.26027	1.19e-12	Negative
mTEC	L1PB4	LINE	-0.355069	1.68e-56	Negative
Endothelial	L1PBa	LINE	-0.308096	1.42e-24	Negative
Mono/Macro	L1PBa	LINE	-0.258382	0.00320186	Negative
mTEC	L1PBa	LINE	-0.381358	5.32e-65	Negative
Treg	L1PBa	LINE	-0.210859	1.66e-08	Negative
cTEC	L1PBa	LINE	-0.372537	6.88e-185	Negative
VSMC	L1PBa	LINE	-0.256501	2.61e-12	Negative
Endothelial	L1PBa1	LINE	-0.228336	4.1e-14	Negative
mTEC	L1PBa1	LINE	-0.295083	6.18e-39	Negative
cTEC	L1PBa1	LINE	-0.301288	1.87e-118	Negative
VSMC	L1PREC2	LINE	-0.323978	4.81e-19	Negative
Mono/Macro	L1PREC2	LINE	-0.240417	0.00596229	Negative
CD8 SP	L1PREC2	LINE	-0.233373	0	Negative
mTEC	L1PREC2	LINE	-0.372049	6.12e-62	Negative
NK	L1PREC2	LINE	-0.225937	1.42e-18	Negative
cTEC	L1PREC2	LINE	-0.391485	1.53e-205	Negative
Endothelial	L1PREC2	LINE	-0.272228	1.53e-19	Negative
Treg	L1PREC2	LINE	-0.348004	2.83e-22	Negative
VSMC	L2	LINE	-0.343312	2.19e-21	Negative
cTEC	L2	LINE	-0.441202	1.65e-266	Negative
Mono/Macro	L2	LINE	-0.21902	0.011834	Negative
CD8 SP	L2	LINE	-0.319512	0	Negative
Endothelial	L2	LINE	-0.221138	2.59e-13	Negative
B cell	L2	LINE	-0.227766	8.19e-16	Negative
DC	L2	LINE	-0.204314	1.12e-22	Negative
mTEC	L2	LINE	-0.395771	6.26e-70	Negative
CD4 SP	L2	LINE	-0.255944	0	Negative
Treg	L2	LINE	-0.401475	8.56e-30	Negative
NKT	L2	LINE	-0.209188	8.38e-07	Negative
Mono/Macro	L2-1_AMi	LINE	-0.261251	0.00309236	Negative
cTEC	L2-1_AMi	LINE	-0.257996	3.14e-86	Negative
mTEC	L2-1_AMi	LINE	-0.265581	1.42e-31	Negative
Mono/Macro	L2-3_Crp	LINE	-0.220909	0.0110511	Negative
Endothelial	L2-3_Crp	LINE	-0.203197	2.07e-11	Negative
cTEC	L2-3_Crp	LINE	-0.318339	8.89e-133	Negative
mTEC	L2-3_Crp	LINE	-0.265166	1.75e-31	Negative
cTEC	L2a	LINE	-0.472062	0	Negative
B cell	L2a	LINE	-0.201876	7.45e-13	Negative
NKT	L2a	LINE	-0.223705	1.47e-07	Negative
mTEC	L2a	LINE	-0.408446	1.13e-74	Negative
Endothelial	L2a	LINE	-0.300768	1.68e-23	Negative
CD8 SP	L2a	LINE	-0.362908	0	Negative
DC	L2a	LINE	-0.227682	1.02e-27	Negative
NK	L2a	LINE	-0.206514	7.25e-16	Negative
Th17	L2a	LINE	-0.252144	2.2e-29	Negative
CD4 SP	L2a	LINE	-0.279927	0	Negative
Treg	L2a	LINE	-0.424861	1.4e-33	Negative
VSMC	L2a	LINE	-0.358108	2.75e-23	Negative
B_pro/pre	L2a	LINE	-0.277574	0.0487157	Negative
mTEC	L2b	LINE	-0.373818	1.93e-62	Negative
Treg	L2b	LINE	-0.398179	2.5e-29	Negative
B_pro/pre	L2b	LINE	-0.285708	0.0487157	Negative
VSMC	L2b	LINE	-0.335467	2.12e-20	Negative
CD4 SP	L2b	LINE	-0.250525	0	Negative
Endothelial	L2b	LINE	-0.279841	1.46e-20	Negative
CD8 SP	L2b	LINE	-0.325943	0	Negative
Th17	L2b	LINE	-0.225914	6.22e-24	Negative
cTEC	L2b	LINE	-0.45878	3.64e-290	Negative
Mono/Macro	L2b	LINE	-0.218579	0.0119983	Negative
NKT	L2b	LINE	-0.247472	5.68e-09	Negative
DC	L2b	LINE	-0.21109	4.36e-24	Negative
CD4 SP	L2c	LINE	-0.265701	0	Negative
VSMC	L2c	LINE	-0.322834	6.16e-19	Negative
Treg	L2c	LINE	-0.415293	5.46e-32	Negative
DC	L2c	LINE	-0.202667	2.42e-22	Negative
NKT	L2c	LINE	-0.206858	1.12e-06	Negative
cTEC	L2c	LINE	-0.45842	7.93e-290	Negative
Th17	L2c	LINE	-0.235836	5.85e-26	Negative
Endothelial	L2c	LINE	-0.279458	1.65e-20	Negative
mTEC	L2c	LINE	-0.393725	2.6e-69	Negative
NK	L2c	LINE	-0.202814	2.02e-15	Negative
CD8 SP	L2c	LINE	-0.339184	0	Negative
VSMC	L3	LINE	-0.26611	3.52e-13	Negative
Endothelial	L3	LINE	-0.240709	1.48e-15	Negative
Treg	L3	LINE	-0.392657	1.63e-28	Negative
cTEC	L3	LINE	-0.419436	1.37e-238	Negative
CD8 SP	L3	LINE	-0.269598	0	Negative
Th17	L3	LINE	-0.220749	6.63e-23	Negative
CD4 SP	L3	LINE	-0.223358	0	Negative
Mono/Macro	L3	LINE	-0.2025	0.0206547	Negative
mTEC	L3	LINE	-0.372785	4.16e-62	Negative
Treg	L3b	LINE	-0.212654	1.24e-08	Negative
VSMC	L3b	LINE	-0.226426	9.65e-10	Negative
Mono/Macro	L3b	LINE	-0.314086	0.000387146	Negative
Endothelial	L3b	LINE	-0.23417	8.86e-15	Negative
mTEC	L3b	LINE	-0.333917	6.19e-50	Negative
cTEC	L3b	LINE	-0.350909	7.64e-163	Negative
Endothelial	L4_A_Mam	LINE	-0.234938	7.17e-15	Negative
mTEC	L4_A_Mam	LINE	-0.323201	9.52e-47	Negative
cTEC	L4_A_Mam	LINE	-0.343886	4.7e-156	Negative
DC	L4_A_Mam	LINE	-0.221353	2.73e-26	Negative
Endothelial	L4_B_Mam	LINE	-0.251701	6.63e-17	Negative
mTEC	L4_B_Mam	LINE	-0.31408	3.9e-44	Negative
Treg	L4_B_Mam	LINE	-0.241835	5.9e-11	Negative
cTEC	L4_B_Mam	LINE	-0.358286	3.51e-170	Negative
DC	L4_C_Mam	LINE	-0.225763	2.71e-27	Negative
cTEC	L4_C_Mam	LINE	-0.342129	2.18e-154	Negative
Mono/Macro	L4_C_Mam	LINE	-0.220645	0.0111102	Negative
mTEC	L4_C_Mam	LINE	-0.319542	1.07e-45	Negative
Endothelial	L4_C_Mam	LINE	-0.246208	3.19e-16	Negative
mTEC	LFSINE_Vert	SINE	-0.214164	8.29e-21	Negative
cTEC	LFSINE_Vert	SINE	-0.253696	2.4e-83	Negative
DC	LFSINE_Vert	SINE	-0.203681	1.53e-22	Negative
mTEC	LOR1-int	LTR	-0.282981	8.09e-36	Negative
cTEC	LOR1-int	LTR	-0.254856	4.07e-84	Negative
mTEC	LOR1a	LTR	-0.207844	1.16e-19	Negative
Endothelial	LOR1b	LTR	-0.248199	1.81e-16	Negative
cTEC	LOR1b	LTR	-0.219675	1.99e-62	Negative
mTEC	LOR1b	LTR	-0.216969	2.5e-21	Negative
cTEC	LTR101_Mam	LTR	-0.207143	1.46e-55	Negative
Endothelial	LTR10C	LTR	-0.204673	1.45e-11	Negative
cTEC	LTR10C	LTR	-0.236784	1.54e-72	Negative
cTEC	LTR10D	LTR	-0.244498	2.31e-77	Negative
cTEC	LTR10E	LTR	-0.252561	1.36e-82	Negative
cTEC	LTR10F	LTR	-0.243118	1.75e-76	Negative
mTEC	LTR10F	LTR	-0.253941	6.47e-29	Negative
mTEC	LTR12	LTR	-0.252638	1.27e-28	Negative
NKT	LTR12C	LTR	0.201276	2.35e-06	Positive
DP	LTR12E	LTR	0.225557	0	Positive
CD8 SP	LTR12E	LTR	0.216172	0	Positive
mTEC	LTR12E	LTR	-0.221778	3.1e-22	Negative
mTEC	LTR12F	LTR	-0.228749	1.37e-23	Negative
CD8 SP	LTR12F	LTR	-0.205694	1.35945530034305e-313	Negative
Endothelial	LTR13	LTR	-0.211671	2.69e-12	Negative
cTEC	LTR13	LTR	-0.226236	3.31e-66	Negative
mTEC	LTR13	LTR	-0.267558	4.86e-32	Negative
mTEC	LTR13A	LTR	-0.217232	2.25e-21	Negative
mTEC	LTR16	LTR	-0.224482	9.4e-23	Negative
cTEC	LTR16	LTR	-0.230878	5.96e-69	Negative
cTEC	LTR16A	LTR	-0.272131	4.18e-96	Negative
mTEC	LTR16A	LTR	-0.233195	1.74e-24	Negative
mTEC	LTR16A1	LTR	-0.239415	9.03e-26	Negative
cTEC	LTR16A2	LTR	-0.219596	2.2e-62	Negative
mTEC	LTR16A2	LTR	-0.210419	3.99e-20	Negative
cTEC	LTR16B2	LTR	-0.211395	7.64e-58	Negative
cTEC	LTR16C	LTR	-0.261483	1.31e-88	Negative
Endothelial	LTR16C	LTR	-0.258199	1.03e-17	Negative
mTEC	LTR16C	LTR	-0.282715	9.41e-36	Negative
Mono/Macro	LTR16C	LTR	-0.208787	0.0165522	Negative
cTEC	LTR16E1	LTR	-0.238791	8.86e-74	Negative
mTEC	LTR16E2	LTR	-0.214286	7.92e-21	Negative
mTEC	LTR17	LTR	-0.236092	4.44e-25	Negative
Endothelial	LTR17	LTR	-0.217122	7.06e-13	Negative
Mono/Macro	LTR1A2	LTR	-0.241019	0.00590214	Negative
mTEC	LTR1A2	LTR	-0.234715	8.53e-25	Negative
Endothelial	LTR2	LTR	-0.201423	3.12e-11	Negative
mTEC	LTR2	LTR	-0.203607	6.52e-19	Negative
cTEC	LTR23	LTR	-0.216581	1.07e-60	Negative
cTEC	LTR24	LTR	-0.20327	1.62e-53	Negative
cTEC	LTR25-int	LTR	-0.212706	1.47e-58	Negative
Endothelial	LTR25-int	LTR	-0.215092	1.16e-12	Negative
Mono/Macro	LTR26C	LTR	-0.217215	0.0124687	Negative
Mono/Macro	LTR27D	LTR	-0.217554	0.0124184	Negative
Mono/Macro	LTR28B	LTR	-0.200633	0.0221995	Negative
Mono/Macro	LTR2B	LTR	-0.241296	0.00590214	Negative
cTEC	LTR2C	LTR	-0.206426	3.52e-55	Negative
Endothelial	LTR33	LTR	-0.212592	2.15e-12	Negative
cTEC	LTR33	LTR	-0.313602	1.05e-128	Negative
mTEC	LTR33	LTR	-0.319001	1.54e-45	Negative
mTEC	LTR33A	LTR	-0.217713	1.82e-21	Negative
cTEC	LTR33A	LTR	-0.239608	2.75e-74	Negative
mTEC	LTR33A_	LTR	-0.214648	6.79e-21	Negative
cTEC	LTR33A_	LTR	-0.227684	4.66e-67	Negative
Endothelial	LTR33A_	LTR	-0.210129	3.92e-12	Negative
mTEC	LTR33C	LTR	-0.200852	1.94e-18	Negative
mTEC	LTR36	LTR	-0.206921	1.68e-19	Negative
cTEC	LTR36	LTR	-0.251923	3.6e-82	Negative
mTEC	LTR37-int	LTR	-0.226043	4.64e-23	Negative
cTEC	LTR37-int	LTR	-0.302014	4.8e-119	Negative
Endothelial	LTR37-int	LTR	-0.212595	2.15e-12	Negative
cTEC	LTR37A	LTR	-0.242984	2.12e-76	Negative
mTEC	LTR37A	LTR	-0.236639	3.43e-25	Negative
cTEC	LTR37B	LTR	-0.267866	4.62e-93	Negative
mTEC	LTR37B	LTR	-0.220789	4.81e-22	Negative
mTEC	LTR40a	LTR	-0.201897	1.3e-18	Negative
cTEC	LTR40a	LTR	-0.245682	4.06e-78	Negative
mTEC	LTR40b	LTR	-0.223192	1.65e-22	Negative
cTEC	LTR40b	LTR	-0.230794	6.65e-69	Negative
mTEC	LTR41	LTR	-0.201752	1.37e-18	Negative
cTEC	LTR41	LTR	-0.239187	5.03e-74	Negative
Mono/Macro	LTR41B	LTR	-0.221508	0.0108172	Negative
cTEC	LTR41C	LTR	-0.236068	4.24e-72	Negative
cTEC	LTR48	LTR	-0.201431	1.45e-52	Negative
mTEC	LTR48	LTR	-0.208628	8.42e-20	Negative
cTEC	LTR48B	LTR	-0.24703	5.5e-79	Negative
Endothelial	LTR48B	LTR	-0.205204	1.28e-11	Negative
Treg	LTR48B	LTR	-0.228456	7.55e-10	Negative
Mono/Macro	LTR48B	LTR	-0.307766	0.000463484	Negative
CD8 SP	LTR48B	LTR	-0.294276	0	Negative
DC	LTR48B	LTR	-0.224574	4.91e-27	Negative
Th17	LTR48B	LTR	-0.221045	5.94e-23	Negative
mTEC	LTR48B	LTR	-0.214215	8.14e-21	Negative
cTEC	LTR49	LTR	-0.214956	8.49e-60	Negative
mTEC	LTR49-int	LTR	-0.245351	5.01e-27	Negative
cTEC	LTR49-int	LTR	-0.294854	2.73e-113	Negative
Mono/Macro	LTR49-int	LTR	-0.236967	0.00665396	Negative
VSMC	LTR49-int	LTR	-0.206453	2.99e-08	Negative
Treg	LTR49-int	LTR	-0.211594	1.47e-08	Negative
Endothelial	LTR49-int	LTR	-0.229485	3.04e-14	Negative
CD4 SP	LTR5_Hs	LTR	-0.25429	0	Negative
Th17	LTR5_Hs	LTR	-0.214198	1.25e-21	Negative
CD8 SP	LTR5_Hs	LTR	-0.295233	0	Negative
Treg	LTR5_Hs	LTR	-0.345625	5.62e-22	Negative
DC	LTR5_Hs	LTR	-0.25015	1e-32	Negative
B cell	LTR5_Hs	LTR	-0.212392	4.84e-14	Negative
mTEC	LTR5_Hs	LTR	-0.26813	3.56e-32	Negative
Endothelial	LTR5_Hs	LTR	-0.231181	1.96e-14	Negative
cTEC	LTR5_Hs	LTR	-0.277383	6.15e-100	Negative
VSMC	LTR5_Hs	LTR	-0.223549	1.61e-09	Negative
Mono/Macro	LTR5_Hs	LTR	-0.251504	0.00419411	Negative
Mono/Macro	LTR50	LTR	-0.206876	0.0176168	Negative
Endothelial	LTR50	LTR	-0.216964	7.33e-13	Negative
cTEC	LTR50	LTR	-0.267589	7.24e-93	Negative
mTEC	LTR50	LTR	-0.268965	2.25e-32	Negative
Mono/Macro	LTR54	LTR	-0.257782	0.00326249	Negative
cTEC	LTR54	LTR	-0.249291	1.91e-80	Negative
mTEC	LTR54B	LTR	-0.211505	2.55e-20	Negative
cTEC	LTR56	LTR	-0.213354	6.49e-59	Negative
mTEC	LTR56	LTR	-0.243981	9.85e-27	Negative
mTEC	LTR5A	LTR	-0.201035	1.83e-18	Negative
cTEC	LTR5A	LTR	-0.217834	2.15e-61	Negative
mTEC	LTR5B	LTR	-0.200212	2.5e-18	Negative
Mono/Macro	LTR5B	LTR	-0.246185	0.00512643	Negative
Endothelial	LTR61	LTR	-0.216034	9.2e-13	Negative
cTEC	LTR67B	LTR	-0.249155	2.33e-80	Negative
Endothelial	LTR67B	LTR	-0.239097	2.31e-15	Negative
mTEC	LTR67B	LTR	-0.25687	1.42e-29	Negative
Endothelial	LTR7	LTR	-0.211305	2.93e-12	Negative
mTEC	LTR7	LTR	-0.285038	2.46e-36	Negative
cTEC	LTR7	LTR	-0.258089	2.73e-86	Negative
Mono/Macro	LTR7	LTR	-0.200498	0.0221995	Negative
VSMC	LTR78	LTR	-0.215046	7.09e-09	Negative
Endothelial	LTR78	LTR	-0.217668	6.16e-13	Negative
mTEC	LTR78	LTR	-0.257049	1.3e-29	Negative
cTEC	LTR78	LTR	-0.217655	2.7e-61	Negative
mTEC	LTR78B	LTR	-0.233389	1.6e-24	Negative
cTEC	LTR78B	LTR	-0.250008	6.5e-81	Negative
Mono/Macro	LTR79	LTR	-0.278929	0.00155822	Negative
cTEC	LTR79	LTR	-0.280574	2.62e-102	Negative
mTEC	LTR79	LTR	-0.286507	1.04e-36	Negative
Mono/Macro	LTR7B	LTR	-0.359158	2.83e-05	Negative
mTEC	LTR7B	LTR	-0.242056	2.51e-26	Negative
VSMC	LTR7B	LTR	-0.293497	7.8e-16	Negative
Endothelial	LTR7B	LTR	-0.246327	3.1e-16	Negative
cTEC	LTR7B	LTR	-0.282039	2.1e-103	Negative
CD8 SP	LTR7B	LTR	-0.222489	0	Negative
mTEC	LTR7Y	LTR	-0.211134	2.97e-20	Negative
CD8 SP	LTR8	LTR	-0.205336	1.71132506805194e-312	Negative
mTEC	LTR8	LTR	-0.248445	1.08e-27	Negative
Endothelial	LTR8	LTR	-0.246455	3e-16	Negative
Mono/Macro	LTR8	LTR	-0.269192	0.0023584	Negative
cTEC	LTR8	LTR	-0.217333	4.06e-61	Negative
cTEC	LTR81B	LTR	-0.217539	3.13e-61	Negative
cTEC	LTR82A	LTR	-0.202004	7.33e-53	Negative
cTEC	LTR84b	LTR	-0.215114	6.96e-60	Negative
mTEC	LTR87	LTR	-0.220154	6.34e-22	Negative
cTEC	LTR87	LTR	-0.222087	8.38e-64	Negative
mTEC	LTR88b	LTR	-0.209138	6.82e-20	Negative
cTEC	LTR8B	LTR	-0.216449	1.26e-60	Negative
mTEC	LTR9	LTR	-0.240774	4.68e-26	Negative
cTEC	LTR9A1	LTR	-0.212919	1.12e-58	Negative
cTEC	LTR9B	LTR	-0.236503	2.29e-72	Negative
mTEC	LTR9B	LTR	-0.213541	1.08e-20	Negative
Mono/Macro	LTR9D	LTR	-0.235198	0.00692743	Negative
cTEC	MamGypLTR1b	LTR	-0.229984	2.03e-68	Negative
Mono/Macro	MamGypsy2-I	LTR	-0.211377	0.0150818	Negative
cTEC	MamGypsy2-I	LTR	-0.223985	6.74e-65	Negative
mTEC	MamGypsy2-I	LTR	-0.242629	1.9e-26	Negative
Treg	MamRTE1	LINE	-0.21215	1.35e-08	Negative
cTEC	MamRTE1	LINE	-0.358323	3.26e-170	Negative
DC	MamRTE1	LINE	-0.237758	5.73e-30	Negative
Endothelial	MamRTE1	LINE	-0.226483	6.56e-14	Negative
mTEC	MamRTE1	LINE	-0.321326	3.34e-46	Negative
Treg	MamSINE1	SINE	-0.257142	2.64e-12	Negative
Endothelial	MamSINE1	SINE	-0.216571	8.08e-13	Negative
mTEC	MamSINE1	SINE	-0.306844	4.08e-42	Negative
Mono/Macro	MamSINE1	SINE	-0.275855	0.00176989	Negative
cTEC	MamSINE1	SINE	-0.341574	7.19e-154	Negative
cTEC	MER101-int	LTR	-0.276994	1.19e-99	Negative
Treg	MER101-int	LTR	-0.209354	2.13e-08	Negative
Mono/Macro	MER101-int	LTR	-0.214404	0.0137221	Negative
mTEC	MER101-int	LTR	-0.206741	1.81e-19	Negative
mTEC	MER11A	LTR	-0.225931	4.87e-23	Negative
cTEC	MER11A	LTR	-0.235264	1.32e-71	Negative
mTEC	MER11B	LTR	-0.200134	2.57e-18	Negative
Mono/Macro	MER11B	LTR	-0.226624	0.00900732	Negative
mTEC	MER11C	LTR	-0.255649	2.68e-29	Negative
cTEC	MER11C	LTR	-0.263749	3.56e-90	Negative
Treg	MER21-int	LTR	-0.243801	4.02e-11	Negative
cTEC	MER21-int	LTR	-0.211139	1.05e-57	Negative
B cell	MER21-int	LTR	-0.205016	3.43e-13	Negative
mTEC	MER21-int	LTR	-0.226377	4.03e-23	Negative
mTEC	MER21A	LTR	-0.333228	9.83e-50	Negative
Mono/Macro	MER21A	LTR	-0.252602	0.00410343	Negative
cTEC	MER21A	LTR	-0.316719	2.23e-131	Negative
DC	MER21A	LTR	-0.200499	6.77e-22	Negative
Endothelial	MER21A	LTR	-0.241753	1.12e-15	Negative
Endothelial	MER21B	LTR	-0.21575	9.85e-13	Negative
mTEC	MER21B	LTR	-0.326122	1.33e-47	Negative
cTEC	MER21B	LTR	-0.313162	2.47e-128	Negative
Mono/Macro	MER21B	LTR	-0.258973	0.00320186	Negative
DC	MER21B	LTR	-0.230808	2.23e-28	Negative
Endothelial	MER21C	LTR	-0.24835	1.74e-16	Negative
VSMC	MER21C	LTR	-0.24581	2.35e-11	Negative
mTEC	MER21C	LTR	-0.335224	2.47e-50	Negative
CD8 SP	MER21C	LTR	-0.215123	0	Negative
cTEC	MER21C	LTR	-0.323576	2.2e-137	Negative
mTEC	MER31-int	LTR	-0.216983	2.5e-21	Negative
cTEC	MER31-int	LTR	-0.233032	3.01e-70	Negative
cTEC	MER31A	LTR	-0.237276	7.67e-73	Negative
mTEC	MER31A	LTR	-0.228947	1.26e-23	Negative
Endothelial	MER31B	LTR	-0.205019	1.34e-11	Negative
mTEC	MER31B	LTR	-0.218044	1.59e-21	Negative
cTEC	MER31B	LTR	-0.257244	1.01e-85	Negative
cTEC	MER34	LTR	-0.230825	6.39e-69	Negative
Endothelial	MER34	LTR	-0.219503	3.9e-13	Negative
mTEC	MER34A	LTR	-0.228562	1.49e-23	Negative
cTEC	MER34A	LTR	-0.254704	5.11e-84	Negative
Endothelial	MER34A	LTR	-0.22913	3.34e-14	Negative
Endothelial	MER34B	LTR	-0.202051	2.71e-11	Negative
cTEC	MER34B-int	LTR	-0.203264	1.63e-53	Negative
VSMC	MER39	LTR	-0.23218	3.29e-10	Negative
mTEC	MER39	LTR	-0.296379	2.8e-39	Negative
Endothelial	MER39	LTR	-0.213138	1.89e-12	Negative
cTEC	MER39	LTR	-0.275787	9.13e-99	Negative
cTEC	MER39B	LTR	-0.248781	4.06e-80	Negative
mTEC	MER39B	LTR	-0.279048	7.78e-35	Negative
cTEC	MER4-int	LTR	-0.3276	5.87e-141	Negative
Treg	MER4-int	LTR	-0.247781	1.82e-11	Negative
Mono/Macro	MER4-int	LTR	-0.241192	0.00590214	Negative
mTEC	MER4-int	LTR	-0.290856	7.9e-38	Negative
Endothelial	MER4-int	LTR	-0.259593	6.81e-18	Negative
VSMC	MER4-int	LTR	-0.234433	2.19e-10	Negative
mTEC	MER41-int	LTR	-0.28446	3.43e-36	Negative
Endothelial	MER41-int	LTR	-0.207407	7.56e-12	Negative
VSMC	MER41-int	LTR	-0.222554	1.89e-09	Negative
cTEC	MER41-int	LTR	-0.310431	4.97e-126	Negative
Treg	MER41A	LTR	-0.26856	2.25e-13	Negative
cTEC	MER41A	LTR	-0.291396	1.44e-110	Negative
mTEC	MER41A	LTR	-0.224024	1.14e-22	Negative
Endothelial	MER41A	LTR	-0.249662	1.19e-16	Negative
Mono/Macro	MER41A	LTR	-0.267917	0.00248957	Negative
mTEC	MER41B	LTR	-0.265014	1.9e-31	Negative
cTEC	MER41B	LTR	-0.260744	4.22e-88	Negative
Endothelial	MER41B	LTR	-0.214648	1.29e-12	Negative
Mono/Macro	MER41C	LTR	-0.259348	0.00320186	Negative
mTEC	MER41C	LTR	-0.226189	4.37e-23	Negative
mTEC	MER49	LTR	-0.272704	2.85e-33	Negative
cTEC	MER49	LTR	-0.228035	2.89e-67	Negative
mTEC	MER4A	LTR	-0.22444	9.54e-23	Negative
cTEC	MER4A	LTR	-0.242275	5.94e-76	Negative
mTEC	MER4A1	LTR	-0.276058	4.3e-34	Negative
cTEC	MER4A1	LTR	-0.281973	2.35e-103	Negative
cTEC	MER4A1_	LTR	-0.201288	1.71e-52	Negative
mTEC	MER4B	LTR	-0.214888	6.14e-21	Negative
cTEC	MER4B	LTR	-0.241961	9.33e-76	Negative
mTEC	MER4B-int	LTR	-0.224174	1.07e-22	Negative
Endothelial	MER4B-int	LTR	-0.263078	2.43e-18	Negative
cTEC	MER4B-int	LTR	-0.25938	3.62e-87	Negative
VSMC	MER4B-int	LTR	-0.203342	5.03e-08	Negative
Mono/Macro	MER4C	LTR	-0.234806	0.00693737	Negative
cTEC	MER4C	LTR	-0.209669	6.53e-57	Negative
cTEC	MER4CL34	LTR	-0.217464	3.44e-61	Negative
mTEC	MER4D	LTR	-0.245893	3.83e-27	Negative
cTEC	MER4D	LTR	-0.25666	2.5e-85	Negative
mTEC	MER4D1	LTR	-0.230006	7.76e-24	Negative
cTEC	MER4D1	LTR	-0.242613	3.64e-76	Negative
Mono/Macro	MER4D1	LTR	-0.229299	0.00831326	Negative
cTEC	MER4E	LTR	-0.247916	1.48e-79	Negative
cTEC	MER4E1	LTR	-0.268689	1.21e-93	Negative
Endothelial	MER4E1	LTR	-0.200685	3.68e-11	Negative
mTEC	MER4E1	LTR	-0.207404	1.38e-19	Negative
Endothelial	MER50	LTR	-0.225268	8.98e-14	Negative
cTEC	MER50	LTR	-0.255843	8.86e-85	Negative
mTEC	MER50	LTR	-0.292925	2.28e-38	Negative
cTEC	MER51-int	LTR	-0.228622	1.3e-67	Negative
cTEC	MER51A	LTR	-0.22409	5.88e-65	Negative
mTEC	MER51A	LTR	-0.279031	7.82e-35	Negative
mTEC	MER52A	LTR	-0.247917	1.39e-27	Negative
Endothelial	MER52A	LTR	-0.231145	1.97e-14	Negative
cTEC	MER52A	LTR	-0.249216	2.13e-80	Negative
mTEC	MER52C	LTR	-0.22056	5.31e-22	Negative
mTEC	MER52D	LTR	-0.261134	1.51e-30	Negative
cTEC	MER54A	LTR	-0.200328	5.32e-52	Negative
cTEC	MER57-int	LTR	-0.257007	1.46e-85	Negative
mTEC	MER57-int	LTR	-0.242119	2.44e-26	Negative
mTEC	MER57A-int	LTR	-0.258643	5.68e-30	Negative
cTEC	MER57A-int	LTR	-0.264219	1.69e-90	Negative
cTEC	MER57A1	LTR	-0.208936	1.62e-56	Negative
cTEC	MER57B1	LTR	-0.209447	8.59e-57	Negative
mTEC	MER57B2	LTR	-0.213055	1.33e-20	Negative
Mono/Macro	MER57B2	LTR	-0.246866	0.00503732	Negative
cTEC	MER57B2	LTR	-0.214706	1.17e-59	Negative
Endothelial	MER57E3	LTR	-0.201398	3.13e-11	Negative
cTEC	MER57E3	LTR	-0.221554	1.69e-63	Negative
Mono/Macro	MER57F	LTR	-0.203283	0.0200682	Negative
Endothelial	MER61-int	LTR	-0.261418	3.93e-18	Negative
cTEC	MER61-int	LTR	-0.270716	4.33e-95	Negative
mTEC	MER61-int	LTR	-0.226163	4.41e-23	Negative
VSMC	MER61-int	LTR	-0.200303	8.22e-08	Negative
Treg	MER61B	LTR	-0.241128	6.75e-11	Negative
mTEC	MER65-int	LTR	-0.261969	9.78e-31	Negative
Endothelial	MER65-int	LTR	-0.220865	2.76e-13	Negative
cTEC	MER65-int	LTR	-0.268301	2.28e-93	Negative
mTEC	MER65A	LTR	-0.257509	1.03e-29	Negative
cTEC	MER65A	LTR	-0.236032	4.45e-72	Negative
Mono/Macro	MER65A	LTR	-0.208446	0.0167066	Negative
Mono/Macro	MER65C	LTR	-0.265248	0.00274086	Negative
cTEC	MER65C	LTR	-0.241484	1.86e-75	Negative
mTEC	MER66B	LTR	-0.258182	7.23e-30	Negative
cTEC	MER66B	LTR	-0.237864	3.33e-73	Negative
cTEC	MER67B	LTR	-0.207975	5.26e-56	Negative
mTEC	MER67C	LTR	-0.204957	3.75e-19	Negative
Treg	MER68	LTR	-0.214172	9.67e-09	Negative
DC	MER68	LTR	-0.203639	1.55e-22	Negative
cTEC	MER68	LTR	-0.282215	1.56e-103	Negative
mTEC	MER68	LTR	-0.297462	1.45e-39	Negative
Mono/Macro	MER68	LTR	-0.229528	0.00831326	Negative
cTEC	MER68B	LTR	-0.210621	2e-57	Negative
cTEC	MER72	LTR	-0.218849	5.76e-62	Negative
Mono/Macro	MER74A	LTR	-0.220092	0.011326	Negative
mTEC	MER74A	LTR	-0.257157	1.23e-29	Negative
cTEC	MER74A	LTR	-0.248275	8.65e-80	Negative
mTEC	MER74B	LTR	-0.265559	1.43e-31	Negative
cTEC	MER74B	LTR	-0.253727	2.3e-83	Negative
cTEC	MER77	LTR	-0.247502	2.73e-79	Negative
mTEC	MER77	LTR	-0.261325	1.37e-30	Negative
cTEC	MER77B	LTR	-0.241737	1.29e-75	Negative
Mono/Macro	MER77B	LTR	-0.228453	0.00852751	Negative
NK	MER77B	LTR	-0.20554	9.49e-16	Negative
Treg	MER77B	LTR	-0.212883	1.2e-08	Negative
Th17	MER77B	LTR	-0.211631	3.97e-21	Negative
DC	MER77B	LTR	-0.208984	1.21e-23	Negative
mTEC	MER77B	LTR	-0.234917	7.77e-25	Negative
mTEC	MER89	LTR	-0.21997	6.86e-22	Negative
mTEC	MER90a	LTR	-0.22918	1.14e-23	Negative
Mono/Macro	MER90a	LTR	-0.21572	0.0130786	Negative
cTEC	MER90a	LTR	-0.222931	2.74e-64	Negative
cTEC	MER92-int	LTR	-0.232169	9.98e-70	Negative
Endothelial	MER92B	LTR	-0.206739	8.88e-12	Negative
Mono/Macro	MER92B	LTR	-0.234852	0.00693737	Negative
mTEC	MER92B	LTR	-0.222334	2.42e-22	Negative
cTEC	MER92B	LTR	-0.208745	2.04e-56	Negative
cTEC	MER9a3	LTR	-0.202139	6.25e-53	Negative
Treg	MIR	SINE	-0.375786	5.06e-26	Negative
CD4 SP	MIR	SINE	-0.246073	0	Negative
CD8 SP	MIR	SINE	-0.316409	0	Negative
VSMC	MIR	SINE	-0.30736	2.65e-17	Negative
mTEC	MIR	SINE	-0.377485	1.1e-63	Negative
DC	MIR	SINE	-0.200007	8.5e-22	Negative
Endothelial	MIR	SINE	-0.252103	5.95e-17	Negative
Th17	MIR	SINE	-0.267895	8.82e-33	Negative
cTEC	MIR	SINE	-0.442655	2.46e-268	Negative
DC	MIR1_Amn	SINE	-0.244935	1.99e-31	Negative
mTEC	MIR1_Amn	SINE	-0.348474	1.95e-54	Negative
cTEC	MIR1_Amn	SINE	-0.333983	8.83e-147	Negative
Endothelial	MIR1_Amn	SINE	-0.227433	5.15e-14	Negative
Th17	MIR3	SINE	-0.207501	2.34e-20	Negative
Endothelial	MIR3	SINE	-0.257686	1.2e-17	Negative
Treg	MIR3	SINE	-0.323712	2.69e-19	Negative
VSMC	MIR3	SINE	-0.277979	2.53e-14	Negative
CD4 SP	MIR3	SINE	-0.210174	0	Negative
cTEC	MIR3	SINE	-0.416703	2.91e-235	Negative
DC	MIR3	SINE	-0.220242	4.71e-26	Negative
CD8 SP	MIR3	SINE	-0.254882	0	Negative
mTEC	MIR3	SINE	-0.348952	1.43e-54	Negative
mTEC	MIRb	SINE	-0.371285	1.08e-61	Negative
VSMC	MIRb	SINE	-0.319928	1.21e-18	Negative
CD8 SP	MIRb	SINE	-0.30502	0	Negative
Treg	MIRb	SINE	-0.398588	2.2e-29	Negative
CD4 SP	MIRb	SINE	-0.242615	0	Negative
Endothelial	MIRb	SINE	-0.272564	1.4e-19	Negative
Th17	MIRb	SINE	-0.24263	2.42e-27	Negative
cTEC	MIRb	SINE	-0.44246	4.03e-268	Negative
B_pro/pre	MIRb	SINE	-0.28304	0.0487157	Negative
CD8 SP	MIRc	SINE	-0.246513	0	Negative
mTEC	MIRc	SINE	-0.333447	8.59e-50	Negative
Th17	MIRc	SINE	-0.203831	1.11e-19	Negative
Endothelial	MIRc	SINE	-0.244033	5.99e-16	Negative
Treg	MIRc	SINE	-0.312859	4.84e-18	Negative
cTEC	MIRc	SINE	-0.416272	9.34e-235	Negative
DC	MIRc	SINE	-0.208493	1.54e-23	Negative
VSMC	MIRc	SINE	-0.292942	8.65e-16	Negative
CD4 SP	MIRc	SINE	-0.212914	0	Negative
Endothelial	MLT1A	LTR	-0.252196	5.82e-17	Negative
mTEC	MLT1A	LTR	-0.335228	2.47e-50	Negative
cTEC	MLT1A	LTR	-0.329791	6.18e-143	Negative
Th17	MLT1A0	LTR	-0.216159	5.39e-22	Negative
mTEC	MLT1A0	LTR	-0.324541	3.8e-47	Negative
cTEC	MLT1A0	LTR	-0.366716	8.77e-179	Negative
CD8 SP	MLT1A0	LTR	-0.229557	0	Negative
VSMC	MLT1A0	LTR	-0.20835	2.2e-08	Negative
Endothelial	MLT1A0	LTR	-0.26562	1.14e-18	Negative
Treg	MLT1A0	LTR	-0.346332	4.59e-22	Negative
cTEC	MLT1A0-int	LTR	-0.216081	2.02e-60	Negative
Mono/Macro	MLT1A0-int	LTR	-0.204876	0.0188049	Negative
mTEC	MLT1A1	LTR	-0.348775	1.58e-54	Negative
Treg	MLT1A1	LTR	-0.204518	4.75e-08	Negative
Mono/Macro	MLT1A1	LTR	-0.227404	0.00890863	Negative
cTEC	MLT1A1	LTR	-0.289285	6.23e-109	Negative
Endothelial	MLT1A1	LTR	-0.280536	1.17e-20	Negative
mTEC	MLT1B	LTR	-0.311235	2.44e-43	Negative
VSMC	MLT1B	LTR	-0.255912	2.94e-12	Negative
cTEC	MLT1B	LTR	-0.262156	4.5e-89	Negative
Endothelial	MLT1B	LTR	-0.239801	1.9e-15	Negative
cTEC	MLT1B-int	LTR	-0.204946	2.14e-54	Negative
Th17	MLT1C	LTR	-0.200147	4.99e-19	Negative
Endothelial	MLT1C	LTR	-0.235274	6.6e-15	Negative
mTEC	MLT1C	LTR	-0.310819	3.17e-43	Negative
Treg	MLT1C	LTR	-0.215667	7.46e-09	Negative
VSMC	MLT1C	LTR	-0.208023	2.31e-08	Negative
cTEC	MLT1C	LTR	-0.282968	4.21e-104	Negative
cTEC	MLT1C-int	LTR	-0.211217	9.53e-58	Negative
cTEC	MLT1D	LTR	-0.35455	1.95e-166	Negative
Endothelial	MLT1D	LTR	-0.234051	9.06e-15	Negative
VSMC	MLT1D	LTR	-0.206711	2.88e-08	Negative
Treg	MLT1D	LTR	-0.26174	9.97e-13	Negative
mTEC	MLT1D	LTR	-0.321634	2.73e-46	Negative
cTEC	MLT1D-int	LTR	-0.227073	1.07e-66	Negative
mTEC	MLT1D-int	LTR	-0.228833	1.32e-23	Negative
mTEC	MLT1E	LTR	-0.200967	1.87e-18	Negative
cTEC	MLT1E1	LTR	-0.200876	2.78e-52	Negative
mTEC	MLT1E1A	LTR	-0.271134	6.77e-33	Negative
Endothelial	MLT1E1A	LTR	-0.23379	9.65e-15	Negative
cTEC	MLT1E1A	LTR	-0.25822	2.23e-86	Negative
cTEC	MLT1E2	LTR	-0.30563	5.08e-122	Negative
VSMC	MLT1E2	LTR	-0.20894	1.99e-08	Negative
Endothelial	MLT1E2	LTR	-0.231039	2.02e-14	Negative
mTEC	MLT1E2	LTR	-0.309353	8.06e-43	Negative
Endothelial	MLT1E3	LTR	-0.224253	1.17e-13	Negative
mTEC	MLT1E3	LTR	-0.2434	1.3e-26	Negative
cTEC	MLT1E3	LTR	-0.234883	2.24e-71	Negative
Endothelial	MLT1F	LTR	-0.229862	2.77e-14	Negative
mTEC	MLT1F	LTR	-0.310519	3.83e-43	Negative
Mono/Macro	MLT1F	LTR	-0.325569	0.00024539	Negative
cTEC	MLT1F	LTR	-0.254802	4.41e-84	Negative
cTEC	MLT1F1	LTR	-0.290415	8.29e-110	Negative
mTEC	MLT1F1	LTR	-0.293119	2.04e-38	Negative
Endothelial	MLT1F1	LTR	-0.274671	7.24e-20	Negative
cTEC	MLT1F2	LTR	-0.291471	1.26e-110	Negative
mTEC	MLT1F2	LTR	-0.30572	8.16e-42	Negative
Mono/Macro	MLT1F2	LTR	-0.294551	0.000786218	Negative
Endothelial	MLT1F2	LTR	-0.280768	1.1e-20	Negative
mTEC	MLT1G	LTR	-0.241553	3.2e-26	Negative
cTEC	MLT1G	LTR	-0.22984	2.47e-68	Negative
mTEC	MLT1G1	LTR	-0.321104	3.85e-46	Negative
Mono/Macro	MLT1G1	LTR	-0.242586	0.00577198	Negative
Endothelial	MLT1G3	LTR	-0.219761	3.68e-13	Negative
Mono/Macro	MLT1G3	LTR	-0.240431	0.00596229	Negative
Treg	MLT1G3	LTR	-0.208335	2.53e-08	Negative
cTEC	MLT1G3	LTR	-0.267355	1.06e-92	Negative
mTEC	MLT1G3	LTR	-0.251639	2.11e-28	Negative
VSMC	MLT1G3	LTR	-0.209967	1.68e-08	Negative
mTEC	MLT1H	LTR	-0.332071	2.18e-49	Negative
cTEC	MLT1H	LTR	-0.326572	4.85e-140	Negative
Endothelial	MLT1H	LTR	-0.257308	1.32e-17	Negative
VSMC	MLT1H1	LTR	-0.247506	1.66e-11	Negative
Endothelial	MLT1H1	LTR	-0.224491	1.1e-13	Negative
cTEC	MLT1H1	LTR	-0.210703	1.81e-57	Negative
mTEC	MLT1H1	LTR	-0.271584	5.28e-33	Negative
Fibroblast	MLT1H1	LTR	-0.263295	8.34e-78	Negative
Endothelial	MLT1H2	LTR	-0.215032	1.17e-12	Negative
cTEC	MLT1H2	LTR	-0.25909	5.7e-87	Negative
mTEC	MLT1H2	LTR	-0.266186	1.03e-31	Negative
mTEC	MLT1I	LTR	-0.336822	8.24e-51	Negative
cTEC	MLT1I	LTR	-0.335056	9e-148	Negative
DC	MLT1I	LTR	-0.218352	1.22e-25	Negative
Endothelial	MLT1I	LTR	-0.218935	4.5e-13	Negative
VSMC	MLT1J	LTR	-0.241606	5.51e-11	Negative
cTEC	MLT1J	LTR	-0.345987	4.57e-158	Negative
Endothelial	MLT1J	LTR	-0.25874	8.77e-18	Negative
mTEC	MLT1J	LTR	-0.335487	2.12e-50	Negative
Endothelial	MLT1J1	LTR	-0.226444	6.6e-14	Negative
mTEC	MLT1J1	LTR	-0.321791	2.47e-46	Negative
cTEC	MLT1J1	LTR	-0.263782	3.39e-90	Negative
CD8 SP	MLT1J2	LTR	-0.205529	4.36640248791182e-313	Negative
Mono/Macro	MLT1J2	LTR	-0.249699	0.00449372	Negative
cTEC	MLT1J2	LTR	-0.285646	3.9e-106	Negative
Endothelial	MLT1J2	LTR	-0.21144	2.84e-12	Negative
mTEC	MLT1J2	LTR	-0.315293	1.77e-44	Negative
Mono/Macro	MLT1J2-int	LTR	-0.229389	0.00831326	Negative
mTEC	MLT1K	LTR	-0.347205	4.62e-54	Negative
Endothelial	MLT1K	LTR	-0.238776	2.52e-15	Negative
Treg	MLT1K	LTR	-0.207094	3.09e-08	Negative
DC	MLT1K	LTR	-0.214746	7.21e-25	Negative
cTEC	MLT1K	LTR	-0.336254	7.02e-149	Negative
Endothelial	MLT1L	LTR	-0.250688	8.95e-17	Negative
Mono/Macro	MLT1L	LTR	-0.259324	0.00320186	Negative
mTEC	MLT1L	LTR	-0.327692	4.55e-48	Negative
Treg	MLT1L	LTR	-0.23909	1.01e-10	Negative
VSMC	MLT1L	LTR	-0.203273	5.05e-08	Negative
cTEC	MLT1L	LTR	-0.315356	3.32e-130	Negative
cTEC	MLT1M	LTR	-0.228046	2.86e-67	Negative
mTEC	MLT1M	LTR	-0.210816	3.38e-20	Negative
Endothelial	MLT1M	LTR	-0.22206	2.05e-13	Negative
cTEC	MLT1N2	LTR	-0.297816	1.18e-115	Negative
Mono/Macro	MLT1N2	LTR	-0.210337	0.0156169	Negative
DC	MLT1N2	LTR	-0.20695	3.25e-23	Negative
Endothelial	MLT1N2	LTR	-0.209344	4.75e-12	Negative
mTEC	MLT1N2	LTR	-0.316046	1.08e-44	Negative
Mono/Macro	MLT1O	LTR	-0.23533	0.00692743	Negative
cTEC	MLT1O	LTR	-0.284041	6.52e-105	Negative
Endothelial	MLT1O	LTR	-0.251912	6.26e-17	Negative
mTEC	MLT1O	LTR	-0.319582	1.05e-45	Negative
VSMC	MLT1O	LTR	-0.202643	5.59e-08	Negative
[truncated: 100 more rows]

## Sheet: Supplementary file 1c
Supplementary file 1c. Correlation between KZFP and TE subfamily expression.
Cell type	KZFP	TE subfamily	Age (My)	Correlation	p-value	p.adj	status	ChIP-seq enrichment (-log10(p-value))
Endothelial	ZKSCAN1	AluJb	74.0772	0.256111	3.01e-18	5.54e-15	Positive	NA
Endothelial	ZKSCAN1	AluJo	74.3033	0.255273	3.9e-18	7.09e-15	Positive	NA
Endothelial	ZKSCAN1	AluJr	76.1277	0.254004	5.77e-18	9.81e-15	Positive	NA
Endothelial	ZKSCAN1	AluJr4	78.2876	0.266066	1.28e-19	4.01e-16	Positive	NA
Endothelial	ZKSCAN1	AluSc	44.641	0.234917	1.61e-15	1.39e-12	Positive	NA
Endothelial	ZKSCAN1	AluSc5	42.7187	0.242262	1.95e-16	2.1e-13	Positive	NA
Endothelial	ZKSCAN1	AluSc8	44.9004	0.258756	1.32e-18	2.71e-15	Positive	NA
Endothelial	ZKSCAN1	AluSg	47.4948	0.253958	5.86e-18	9.85e-15	Positive	NA
Endothelial	ZKSCAN1	AluSg4	47.2738	0.258151	1.59e-18	3.21e-15	Positive	NA
Endothelial	ZKSCAN1	AluSg7	41.787	0.235138	1.51e-15	1.31e-12	Positive	NA
Endothelial	ZKSCAN1	AluSp	43.9166	0.243351	1.42e-16	1.58e-13	Positive	NA
Endothelial	ZKSCAN1	AluSq	48.0285	0.26261	3.89e-19	1e-15	Positive	NA
Endothelial	ZKSCAN1	AluSq10	44.57	0.243779	1.25e-16	1.41e-13	Positive	NA
Endothelial	ZKSCAN1	AluSq2	48.7649	0.236598	9.99e-16	9.04e-13	Positive	NA
Endothelial	ZKSCAN1	AluSq4	44.0339	0.256926	2.34e-18	4.46e-15	Positive	NA
Endothelial	ZKSCAN1	AluSx	52.8956	0.252284	9.78e-18	1.57e-14	Positive	NA
Endothelial	ZKSCAN1	AluSx1	51.2327	0.24887	2.75e-17	3.88e-14	Positive	NA
Endothelial	ZKSCAN1	AluSx3	51.4459	0.255306	3.86e-18	7.06e-15	Positive	NA
Endothelial	ZKSCAN1	AluSx4	47.0711	0.274896	6.93e-21	2.9e-17	Positive	NA
Endothelial	ZKSCAN1	AluSz	55.4724	0.241862	2.19e-16	2.29e-13	Positive	NA
Endothelial	ZKSCAN1	AluSz6	59.9588	0.261696	5.2e-19	1.25e-15	Positive	NA
Endothelial	ZKSCAN1	AluY	31.6825	0.257869	1.74e-18	3.43e-15	Positive	NA
Endothelial	ZKSCAN1	AluYb8	11.1883	0.226957	1.46e-14	9.04e-12	Positive	NA
Endothelial	ZKSCAN1	AluYc	32.5372	0.249971	1.98e-17	2.88e-14	Positive	NA
Endothelial	ZKSCAN1	AluYc3	29.0671	0.326031	3.58e-29	3.23e-25	Positive	NA
Endothelial	ZKSCAN1	AluYf1	31.6853	0.260188	8.39e-19	1.91e-15	Positive	NA
Endothelial	ZKSCAN1	AluYg6	31.0589	0.20611	3.21e-12	8.33e-10	Positive	NA
Endothelial	ZKSCAN1	AluYh3	35.1674	0.254554	4.87e-18	8.54e-15	Positive	NA
Endothelial	ZKSCAN1	AluYh3a3	53.8424	0.200933	1.13e-11	2.44e-09	Positive	NA
Endothelial	ZKSCAN1	AluYj4	45.4485	0.215849	2.77e-13	1.04e-10	Positive	NA
Endothelial	ZKSCAN1	AluYk11	50.1591	0.208873	1.62e-12	4.61e-10	Positive	NA
Endothelial	ZKSCAN1	AluYk2	31.1687	0.223487	3.73e-14	1.98e-11	Positive	NA
Endothelial	ZKSCAN1	AluYk3	30.0545	0.2282	1.04e-14	6.77e-12	Positive	NA
Endothelial	ZKSCAN1	AluYk4	27.0219	0.211027	9.46e-13	2.93e-10	Positive	NA
Endothelial	ZKSCAN1	AluYm1	31.7677	0.247537	4.11e-17	5.56e-14	Positive	NA
Endothelial	ZKSCAN1	ERVL-E-int	137.479	0.219646	1.03e-13	4.71e-11	Positive	NA
Endothelial	ZKSCAN1	FAM	85.0846	0.226316	1.74e-14	1.05e-11	Positive	NA
Endothelial	ZKSCAN1	FLAM_A	84.7259	0.260661	7.23e-19	1.67e-15	Positive	NA
Endothelial	ZKSCAN1	FLAM_C	74.2065	0.302994	3.11e-25	2.06e-21	Positive	NA
Endothelial	ZKSCAN1	FRAM	84.0774	0.266428	1.14e-19	3.62e-16	Positive	NA
Endothelial	ZKSCAN1	HAL1	125.034	0.26186	4.94e-19	1.2e-15	Positive	NA
Endothelial	ZKSCAN1	HAL1b	124.652	0.23816	6.39e-16	6.04e-13	Positive	NA
Endothelial	ZKSCAN1	HAL1M8	104.794	0.221224	6.8e-14	3.31e-11	Positive	NA
Endothelial	ZKSCAN1	HAL1ME	129.153	0.229633	7.02e-15	4.85e-12	Positive	NA
Endothelial	ZKSCAN1	HERVH-int	56.4142	0.216796	2.17e-13	8.54e-11	Positive	NA
Endothelial	ZKSCAN1	HERVIP10FH-int	72.2593	0.203073	6.73e-12	1.58e-09	Positive	NA
Endothelial	ZKSCAN1	HERVL40-int	123.296	0.203866	5.56e-12	1.35e-09	Positive	NA
Endothelial	ZKSCAN1	HUERS-P1-int	64.6844	0.207863	2.08e-12	5.75e-10	Positive	NA
Endothelial	ZKSCAN1	HUERS-P2-int	83.7657	0.218719	1.31e-13	5.67e-11	Positive	NA
Endothelial	ZKSCAN1	L1M2	90.312	0.239897	3.88e-16	3.81e-13	Positive	NA
Endothelial	ZKSCAN1	L1M2a	102.588	0.226603	1.61e-14	9.83e-12	Positive	NA
Endothelial	ZKSCAN1	L1M3	86.3375	0.239	5.02e-16	4.83e-13	Positive	NA
Endothelial	ZKSCAN1	L1M3e	104.074	0.232591	3.09e-15	2.41e-12	Positive	NA
Endothelial	ZKSCAN1	L1M4	98.166	0.244933	8.9e-17	1.04e-13	Positive	NA
Endothelial	ZKSCAN1	L1M4a1	115.816	0.2417	2.3e-16	2.37e-13	Positive	NA
Endothelial	ZKSCAN1	L1M4a2	110.177	0.214932	3.51e-13	1.28e-10	Positive	NA
Endothelial	ZKSCAN1	L1M4b	102.823	0.205634	3.61e-12	9.24e-10	Positive	NA
Endothelial	ZKSCAN1	L1M4c	96.892	0.219281	1.13e-13	5.05e-11	Positive	NA
Endothelial	ZKSCAN1	L1M5	125.324	0.275513	5.63e-21	2.43e-17	Positive	NA
Endothelial	ZKSCAN1	L1M7	127.116	0.251558	1.22e-17	1.9e-14	Positive	NA
Endothelial	ZKSCAN1	L1M8	119.121	0.228693	9.09e-15	6.02e-12	Positive	NA
Endothelial	ZKSCAN1	L1MA1	51.4267	0.240665	3.11e-16	3.11e-13	Positive	NA
Endothelial	ZKSCAN1	L1MA10	90.8839	0.233027	2.74e-15	2.18e-12	Positive	NA
Endothelial	ZKSCAN1	L1MA2	56.0415	0.24042	3.33e-16	3.33e-13	Positive	NA
Endothelial	ZKSCAN1	L1MA3	60.3342	0.246885	4.99e-17	6.51e-14	Positive	NA
Endothelial	ZKSCAN1	L1MA4	76.4687	0.283279	3.94e-22	1.89e-18	Positive	NA
Endothelial	ZKSCAN1	L1MA4A	73.5283	0.254285	5.29e-18	9.22e-15	Positive	NA
Endothelial	ZKSCAN1	L1MA5	72.917	0.249805	2.08e-17	3.02e-14	Positive	NA
Endothelial	ZKSCAN1	L1MA5A	63.9142	0.219016	1.22e-13	5.3e-11	Positive	NA
Endothelial	ZKSCAN1	L1MA6	77.5591	0.224444	2.88e-14	1.62e-11	Positive	NA
Endothelial	ZKSCAN1	L1MA7	77.068	0.245743	7e-17	8.51e-14	Positive	NA
Endothelial	ZKSCAN1	L1MA8	74.0797	0.261302	5.9e-19	1.38e-15	Positive	NA
Endothelial	ZKSCAN1	L1MA9	83.3887	0.263671	2.77e-19	7.56e-16	Positive	NA
Endothelial	ZKSCAN1	L1MB1	82.4303	0.250189	1.85e-17	2.71e-14	Positive	NA
Endothelial	ZKSCAN1	L1MB2	82.5759	0.264979	1.82e-19	5.36e-16	Positive	NA
Endothelial	ZKSCAN1	L1MB3	78.8028	0.257	2.28e-18	4.41e-15	Positive	NA
Endothelial	ZKSCAN1	L1MB4	83.1707	0.253279	7.21e-18	1.19e-14	Positive	NA
Endothelial	ZKSCAN1	L1MB5	87.3712	0.250228	1.83e-17	2.71e-14	Positive	NA
Endothelial	ZKSCAN1	L1MB7	85.8397	0.271818	1.94e-20	7.4e-17	Positive	NA
Endothelial	ZKSCAN1	L1MB8	86.387	0.248749	2.85e-17	3.99e-14	Positive	NA
Endothelial	ZKSCAN1	L1MC	105.833	0.250398	1.74e-17	2.6e-14	Positive	NA
Endothelial	ZKSCAN1	L1MC1	74.7836	0.242532	1.8e-16	1.96e-13	Positive	NA
Endothelial	ZKSCAN1	L1MC2	81.8345	0.293335	1.11e-23	6.58e-20	Positive	NA
Endothelial	ZKSCAN1	L1MC3	92.544	0.235706	1.29e-15	1.13e-12	Positive	NA
Endothelial	ZKSCAN1	L1MC4	112.196	0.247408	4.27e-17	5.72e-14	Positive	NA
Endothelial	ZKSCAN1	L1MC5	106.058	0.236005	1.18e-15	1.05e-12	Positive	NA
Endothelial	ZKSCAN1	L1MC5a	114.044	0.257947	1.7e-18	3.37e-15	Positive	NA
Endothelial	ZKSCAN1	L1MCa	96.2839	0.206238	3.11e-12	8.11e-10	Positive	NA
Endothelial	ZKSCAN1	L1MD	108.39	0.241141	2.7e-16	2.73e-13	Positive	NA
Endothelial	ZKSCAN1	L1MD1	87.6221	0.236011	1.18e-15	1.05e-12	Positive	NA
Endothelial	ZKSCAN1	L1MD2	98.6221	0.241985	2.12e-16	2.24e-13	Positive	NA
Endothelial	ZKSCAN1	L1MD3	95.5523	0.222341	5.06e-14	2.6e-11	Positive	NA
Endothelial	ZKSCAN1	L1MDa	101.371	0.248006	3.57e-17	4.94e-14	Positive	NA
Endothelial	ZKSCAN1	L1ME1	108.131	0.259157	1.16e-18	2.51e-15	Positive	NA
Endothelial	ZKSCAN1	L1ME2	111.434	0.252761	8.45e-18	1.37e-14	Positive	NA
Endothelial	ZKSCAN1	L1ME3	110.89	0.269157	4.67e-20	1.69e-16	Positive	NA
Endothelial	ZKSCAN1	L1ME3A	112.949	0.271039	2.51e-20	9.22e-17	Positive	NA
Endothelial	ZKSCAN1	L1ME3B	119.132	0.274715	7.36e-21	3e-17	Positive	NA
Endothelial	ZKSCAN1	L1ME3C	121.986	0.212251	6.95e-13	2.24e-10	Positive	NA
Endothelial	ZKSCAN1	L1ME3Cz	119.085	0.20435	4.94e-12	1.21e-09	Positive	NA
Endothelial	ZKSCAN1	L1ME3D	121.595	0.247749	3.85e-17	5.24e-14	Positive	NA
Endothelial	ZKSCAN1	L1ME3E	122.281	0.250807	1.53e-17	2.35e-14	Positive	NA
Endothelial	ZKSCAN1	L1ME3F	120.613	0.248956	2.68e-17	3.8e-14	Positive	NA
Endothelial	ZKSCAN1	L1ME3G	122.931	0.256582	2.6e-18	4.87e-15	Positive	NA
Endothelial	ZKSCAN1	L1ME4a	121.444	0.255221	3.97e-18	7.16e-15	Positive	NA
Endothelial	ZKSCAN1	L1ME4b	118.559	0.260615	7.33e-19	1.68e-15	Positive	NA
Endothelial	ZKSCAN1	L1ME4c	124.085	0.252627	8.81e-18	1.42e-14	Positive	NA
Endothelial	ZKSCAN1	L1MEb	123.957	0.232822	2.9e-15	2.28e-12	Positive	NA
Endothelial	ZKSCAN1	L1MEc	112.594	0.261571	5.42e-19	1.29e-15	Positive	NA
Endothelial	ZKSCAN1	L1MEd	129.082	0.247215	4.52e-17	5.98e-14	Positive	NA
Endothelial	ZKSCAN1	L1MEf	118.108	0.209633	1.34e-12	3.95e-10	Positive	NA
Endothelial	ZKSCAN1	L1MEg	122.683	0.241222	2.64e-16	2.68e-13	Positive	NA
Endothelial	ZKSCAN1	L1MEg2	130.407	0.214418	4e-13	1.43e-10	Positive	NA
Endothelial	ZKSCAN1	L1MEh	124.925	0.234761	1.68e-15	1.44e-12	Positive	NA
Endothelial	ZKSCAN1	L1MEi	124.969	0.223532	3.68e-14	1.96e-11	Positive	NA
Endothelial	ZKSCAN1	L1P1	31.4848	0.228399	9.85e-15	6.45e-12	Positive	NA
Endothelial	ZKSCAN1	L1P2	36.7651	0.21936	1.11e-13	4.98e-11	Positive	NA
Endothelial	ZKSCAN1	L1P3	46.9838	0.258178	1.58e-18	3.2e-15	Positive	NA
Endothelial	ZKSCAN1	L1P4	68.8132	0.244789	9.29e-17	1.08e-13	Positive	NA
Endothelial	ZKSCAN1	L1PA10	46.9064	0.250507	1.68e-17	2.56e-14	Positive	NA
Endothelial	ZKSCAN1	L1PA11	48.8229	0.265545	1.51e-19	4.65e-16	Positive	NA
Endothelial	ZKSCAN1	L1PA12	60.2653	0.217974	1.6e-13	6.66e-11	Positive	NA
Endothelial	ZKSCAN1	L1PA13	53.5063	0.212482	6.55e-13	2.14e-10	Positive	NA
Endothelial	ZKSCAN1	L1PA14	53.6622	0.242153	2.01e-16	2.16e-13	Positive	NA
Endothelial	ZKSCAN1	L1PA15	65.5369	0.247976	3.6e-17	4.96e-14	Positive	NA
Endothelial	ZKSCAN1	L1PA16	65.3723	0.225694	2.06e-14	1.21e-11	Positive	NA
Endothelial	ZKSCAN1	L1PA17	76.0623	0.262254	4.36e-19	1.09e-15	Positive	NA
Endothelial	ZKSCAN1	L1PA2	10.8815	0.231942	3.7e-15	2.79e-12	Positive	NA
Endothelial	ZKSCAN1	L1PA3	16.059	0.233079	2.7e-15	2.16e-12	Positive	NA
Endothelial	ZKSCAN1	L1PA4	19.8347	0.237931	6.83e-16	6.41e-13	Positive	NA
Endothelial	ZKSCAN1	L1PA5	25.1912	0.28892	5.4e-23	2.98e-19	Positive	NA
Endothelial	ZKSCAN1	L1PA6	32.4337	0.202469	7.79e-12	1.77e-09	Positive	NA
Endothelial	ZKSCAN1	L1PA7	35.9421	0.271661	2.04e-20	7.6e-17	Positive	NA
Endothelial	ZKSCAN1	L1PA8	39.415	0.229707	6.88e-15	4.76e-12	Positive	NA
Endothelial	ZKSCAN1	L1PA8A	48.7524	0.234894	1.62e-15	1.4e-12	Positive	NA
Endothelial	ZKSCAN1	L1PB	59.9942	0.246572	5.48e-17	7.09e-14	Positive	NA
Endothelial	ZKSCAN1	L1PB1	49.1044	0.250812	1.53e-17	2.35e-14	Positive	NA
Endothelial	ZKSCAN1	L1PB2	54.2442	0.213837	4.64e-13	1.62e-10	Positive	NA
Endothelial	ZKSCAN1	L1PB3	67.6083	0.205419	3.81e-12	9.64e-10	Positive	NA
Endothelial	ZKSCAN1	L1PB4	79.3564	0.2344	1.86e-15	1.57e-12	Positive	NA
Endothelial	ZKSCAN1	L1PREC2	57.7129	0.251838	1.12e-17	1.77e-14	Positive	NA
Endothelial	ZKSCAN1	L2	144.256	0.268921	5.04e-20	1.81e-16	Positive	NA
Endothelial	ZKSCAN1	L2a	128.877	0.258835	1.29e-18	2.67e-15	Positive	NA
Endothelial	ZKSCAN1	L2b	140.391	0.27171	2.01e-20	7.57e-17	Positive	NA
Endothelial	ZKSCAN1	L2c	140.977	0.274856	7.02e-21	2.9e-17	Positive	NA
Endothelial	ZKSCAN1	L3	141.644	0.268205	6.37e-20	2.21e-16	Positive	NA
Endothelial	ZKSCAN1	L3b	141.848	0.235704	1.29e-15	1.13e-12	Positive	NA
Endothelial	ZKSCAN1	L4_A_Mam	135.189	0.222279	5.14e-14	2.62e-11	Positive	NA
Endothelial	ZKSCAN1	L4_B_Mam	136.139	0.249458	2.31e-17	3.33e-14	Positive	NA
Endothelial	ZKSCAN1	LOR1b	80.3798	0.24452	1.01e-16	1.16e-13	Positive	NA
Endothelial	ZKSCAN1	LTR17	37.0163	0.216772	2.18e-13	8.58e-11	Positive	NA
Endothelial	ZKSCAN1	LTR24B	85.5853	0.223353	3.86e-14	2.04e-11	Positive	NA
Endothelial	ZKSCAN1	LTR47A2	69.1611	0.202573	7.6e-12	1.73e-09	Positive	NA
Endothelial	ZKSCAN1	LTR5_Hs	32.5359	0.253489	6.76e-18	1.12e-14	Positive	NA
Endothelial	ZKSCAN1	LTR54	75.0748	0.223547	3.67e-14	1.96e-11	Positive	NA
Endothelial	ZKSCAN1	LTR70	68.3276	0.203622	5.9e-12	1.41e-09	Positive	NA
Endothelial	ZKSCAN1	LTR7B	32.1477	0.246746	5.2e-17	6.76e-14	Positive	NA
Endothelial	ZKSCAN1	LTR89	135.023	0.212906	5.88e-13	1.96e-10	Positive	NA
Endothelial	ZKSCAN1	Mam_R4	136.473	0.202458	7.81e-12	1.77e-09	Positive	NA
Endothelial	ZKSCAN1	MamGypLTR1b	130.931	0.219335	1.12e-13	5e-11	Positive	NA
Endothelial	ZKSCAN1	MamRTE1	144.144	0.234396	1.86e-15	1.57e-12	Positive	NA
Endothelial	ZKSCAN1	MamSINE1	147.632	0.219254	1.14e-13	5.08e-11	Positive	NA
Endothelial	ZKSCAN1	MER101-int	94.3679	0.224227	3.06e-14	1.68e-11	Positive	NA
Endothelial	ZKSCAN1	MER21C	100.39	0.220199	8.92e-14	4.19e-11	Positive	NA
Endothelial	ZKSCAN1	MER34A	96.2873	0.247516	4.13e-17	5.57e-14	Positive	NA
Endothelial	ZKSCAN1	MER39	92.4843	0.232738	2.97e-15	2.32e-12	Positive	NA
Endothelial	ZKSCAN1	MER41-int	62.3862	0.212577	6.4e-13	2.1e-10	Positive	NA
Endothelial	ZKSCAN1	MER49	77.5978	0.233097	2.68e-15	2.16e-12	Positive	NA
Endothelial	ZKSCAN1	MER4D1	58.3698	0.205269	3.95e-12	9.96e-10	Positive	NA
Endothelial	ZKSCAN1	MER51A	61.5333	0.217502	1.81e-13	7.35e-11	Positive	NA
B_pro/pre	ZKSCAN1	MER51C	61.239	0.305646	0.000205503	0.0164002	Positive	NA
Endothelial	ZKSCAN1	MER57E3	85.2026	0.228856	8.69e-15	5.79e-12	Positive	NA
Endothelial	ZKSCAN1	MIR	124.913	0.245742	7.01e-17	8.51e-14	Positive	NA
Endothelial	ZKSCAN1	MIR1_Amn	127.729	0.207072	2.54e-12	6.84e-10	Positive	NA
Endothelial	ZKSCAN1	MIR3	131.719	0.241963	2.13e-16	2.24e-13	Positive	NA
Endothelial	ZKSCAN1	MIRb	133.154	0.264313	2.25e-19	6.45e-16	Positive	NA
Endothelial	ZKSCAN1	MIRc	130.519	0.259367	1.09e-18	2.42e-15	Positive	NA
Endothelial	ZKSCAN1	MLT1A	98.3115	0.238997	5.03e-16	4.83e-13	Positive	NA
Endothelial	ZKSCAN1	MLT1A0	88.4734	0.259014	1.22e-18	2.58e-15	Positive	NA
Endothelial	ZKSCAN1	MLT1A1	86.5887	0.223509	3.7e-14	1.97e-11	Positive	NA
Endothelial	ZKSCAN1	MLT1D	97.7897	0.247934	3.65e-17	5e-14	Positive	NA
Endothelial	ZKSCAN1	MLT1F	106.171	0.225696	2.06e-14	1.21e-11	Positive	NA
Endothelial	ZKSCAN1	MLT1F1	103.602	0.259285	1.12e-18	2.46e-15	Positive	NA
Endothelial	ZKSCAN1	MLT1G1	118.971	0.210955	9.63e-13	2.98e-10	Positive	NA
Endothelial	ZKSCAN1	MLT1H2	115.702	0.222061	5.45e-14	2.75e-11	Positive	NA
Endothelial	ZKSCAN1	MLT1J	125.854	0.229025	8.3e-15	5.58e-12	Positive	NA
Endothelial	ZKSCAN1	MLT1J1	121.765	0.205592	3.65e-12	9.31e-10	Positive	NA
Endothelial	ZKSCAN1	MLT1J2	125.207	0.203107	6.68e-12	1.57e-09	Positive	NA
Endothelial	ZKSCAN1	MLT1K	127.697	0.204077	5.28e-12	1.29e-09	Positive	NA
Endothelial	ZKSCAN1	MLT1L	125.549	0.2143	4.12e-13	1.46e-10	Positive	NA
Endothelial	ZKSCAN1	MLT2B4	86.2165	0.20879	1.66e-12	4.7e-10	Positive	NA
Endothelial	ZKSCAN1	MLT2C1	94.708	0.200489	1.25e-11	2.67e-09	Positive	NA
Endothelial	ZKSCAN1	MSTB2	84.3021	0.210154	1.18e-12	3.55e-10	Positive	NA
Endothelial	ZKSCAN1	MSTD	91.4995	0.228712	9.04e-15	6e-12	Positive	NA
Endothelial	ZKSCAN1	Plat_L3	134.245	0.206931	2.62e-12	7.03e-10	Positive	NA
B_pro/pre	ZKSCAN1	PRIMA4_LTR	48.2756	0.297687	0.000305272	0.0221781	Positive	NA
Endothelial	ZKSCAN1	THE1A	46.9465	0.212788	6.06e-13	2.01e-10	Positive	NA
Endothelial	ZKSCAN1	THE1B	57.9657	0.205703	3.55e-12	9.11e-10	Positive	NA
Endothelial	ZKSCAN1	THE1C	55.3593	0.234226	1.95e-15	1.64e-12	Positive	NA
Th17	ZNF10	AluJb	74.0772	-0.266925	9.87e-35	8.94e-31	Negative	0.000210938
NK	ZNF10	AluJb	74.0772	-0.253587	2.15e-25	9.44e-22	Negative	0.000210938
DP	ZNF10	AluJb	74.0772	-0.206799	5.94e-277	3.43e-273	Negative	0.000210938
NK	ZNF10	AluJo	74.3033	-0.259061	1.82e-26	9.21e-23	Negative	0.0019466
Th17	ZNF10	AluJo	74.3033	-0.269361	2.32e-35	2.17e-31	Negative	0.0019466
DP	ZNF10	AluJo	74.3033	-0.204437	1.41e-270	7.47e-267	Negative	0.0019466
NK	ZNF10	AluJr	76.1277	-0.264134	1.74e-27	1.01e-23	Negative	0.0020753
DP	ZNF10	AluJr	76.1277	-0.208112	1.56e-280	9.76e-277	Negative	0.0020753
Th17	ZNF10	AluJr	76.1277	-0.277762	1.4e-37	1.56e-33	Negative	0.0020753
DP	ZNF10	AluJr4	78.2876	-0.202764	4.16e-266	2.13e-262	Negative	0
Th17	ZNF10	AluJr4	78.2876	-0.284756	1.73e-39	2.85e-35	Negative	0
NK	ZNF10	AluJr4	78.2876	-0.264754	1.3e-27	7.82e-24	Negative	0
NK	ZNF10	AluSc	44.641	-0.261447	6.07e-27	3.31e-23	Negative	0
DP	ZNF10	AluSc	44.641	-0.220267	7.658167054329e-315	1.19437539196022e-310	Negative	0
Th17	ZNF10	AluSc	44.641	-0.272994	2.6e-36	2.6e-32	Negative	0
DP	ZNF10	AluSc5	42.7187	-0.219197	9.76003141000925e-312	1.38e-307	Negative	NA
Th17	ZNF10	AluSc5	42.7187	-0.281234	1.61e-38	2.12e-34	Negative	NA
NK	ZNF10	AluSc5	42.7187	-0.25396	1.82e-25	8.12e-22	Negative	NA
Th17	ZNF10	AluSc8	44.9004	-0.277766	1.4e-37	1.56e-33	Negative	0
DP	ZNF10	AluSc8	44.9004	-0.221027	4.64661427742134e-317	9.66254145763189e-313	Negative	0
NK	ZNF10	AluSc8	44.9004	-0.272092	3.97e-29	3e-25	Negative	0
DP	ZNF10	AluSg	47.4948	-0.223039	5.92878775009496e-323	1.68120163901214e-318	Negative	0.00118895
NK	ZNF10	AluSg	47.4948	-0.275397	7.96e-30	6.88e-26	Negative	0.00118895
Th17	ZNF10	AluSg	47.4948	-0.281001	1.86e-38	2.34e-34	Negative	0.00118895
DP	ZNF10	AluSg4	47.2738	-0.224789	0	0	Negative	0.0589014
NK	ZNF10	AluSg4	47.2738	-0.266561	5.58e-28	3.57e-24	Negative	0.0589014
Th17	ZNF10	AluSg4	47.2738	-0.288632	1.44e-40	2.97e-36	Negative	0.0589014
Th17	ZNF10	AluSg7	41.787	-0.290677	3.8e-41	1e-36	Negative	0
DP	ZNF10	AluSg7	41.787	-0.213646	6.9e-296	6.33e-292	Negative	0
NK	ZNF10	AluSg7	41.787	-0.25033	9.11e-25	3.67e-21	Negative	0
Th17	ZNF10	AluSp	43.9166	-0.271317	7.17e-36	6.93e-32	Negative	0.00296369
NK	ZNF10	AluSp	43.9166	-0.254388	1.5e-25	6.81e-22	Negative	0.00296369
DP	ZNF10	AluSp	43.9166	-0.216628	2.39e-304	2.57e-300	Negative	0.00296369
NK	ZNF10	AluSq	48.0285	-0.259965	1.2e-26	6.31e-23	Negative	0.392471
Th17	ZNF10	AluSq	48.0285	-0.284721	1.77e-39	2.85e-35	Negative	0.392471
DP	ZNF10	AluSq	48.0285	-0.223496	0	0	Negative	0.392471
Th17	ZNF10	AluSq10	44.57	-0.201943	2.8e-20	1e-16	Negative	NA
Th17	ZNF10	AluSq2	48.7649	-0.288695	1.38e-40	2.97e-36	Negative	0.00533321
NK	ZNF10	AluSq2	48.7649	-0.2818	3.31e-31	3.75e-27	Negative	0.00533321
DP	ZNF10	AluSq2	48.7649	-0.215266	1.82e-300	1.78e-296	Negative	0.00533321
DP	ZNF10	AluSx	52.8956	-0.207962	4.02e-280	2.46e-276	Negative	5.91e-07
NK	ZNF10	AluSx	52.8956	-0.272563	3.16e-29	2.45e-25	Negative	5.91e-07
Th17	ZNF10	AluSx	52.8956	-0.274402	1.1e-36	1.19e-32	Negative	5.91e-07
Th17	ZNF10	AluSx1	51.2327	-0.273084	2.46e-36	2.55e-32	Negative	1.44e-08
DP	ZNF10	AluSx1	51.2327	-0.211375	1.56e-289	1.32e-285	Negative	1.44e-08
NK	ZNF10	AluSx1	51.2327	-0.257161	4.31e-26	2.15e-22	Negative	1.44e-08
NK	ZNF10	AluSx3	51.4459	-0.280989	4.98e-31	5.42e-27	Negative	0
DP	ZNF10	AluSx3	51.4459	-0.215534	3.16e-301	3.18e-297	Negative	0
Th17	ZNF10	AluSx3	51.4459	-0.289034	1.11e-40	2.67e-36	Negative	0
DP	ZNF10	AluSx4	47.0711	-0.223328	9.88131291682493e-324	3.85272390627004e-319	Negative	0.051487
Th17	ZNF10	AluSx4	47.0711	-0.284273	2.35e-39	3.59e-35	Negative	0.051487
NK	ZNF10	AluSx4	47.0711	-0.276215	5.33e-30	4.9e-26	Negative	0.051487
Th17	ZNF10	AluSz	55.4724	-0.281641	1.24e-38	1.8e-34	Negative	7.35e-10
DP	ZNF10	AluSz	55.4724	-0.211491	7.43e-290	6.44e-286	Negative	7.35e-10
NK	ZNF10	AluSz	55.4724	-0.2733	2.21e-29	1.81e-25	Negative	7.35e-10
NK	ZNF10	AluSz6	59.9588	-0.268435	2.29e-28	1.57e-24	Negative	0.00854457
Th17	ZNF10	AluSz6	59.9588	-0.281518	1.34e-38	1.85e-34	Negative	0.00854457
DP	ZNF10	AluSz6	59.9588	-0.211293	2.64e-289	2.16e-285	Negative	0.00854457
NK	ZNF10	AluY	31.6825	-0.266881	4.79e-28	3.13e-24	Negative	5.37e-08
DP	ZNF10	AluY	31.6825	-0.20917	1.96e-283	1.3e-279	Negative	5.37e-08
Th17	ZNF10	AluY	31.6825	-0.279749	4.07e-38	4.92e-34	Negative	5.37e-08
Th17	ZNF10	AluYa5	6.77491	-0.247592	5.72e-30	4.25e-26	Negative	0
DP	ZNF10	AluYa5	6.77491	-0.233677	0	0	Negative	0
DN	ZNF10	AluYa5	6.77491	-0.203382	1.35172940268209e-310	4.22e-305	Negative	0
NK	ZNF10	AluYa5	6.77491	-0.239596	9.13e-23	3.28e-19	Negative	0
DP	ZNF10	AluYb8	11.1883	-0.210965	2.15e-288	1.68e-284	Negative	0.400453
NK	ZNF10	AluYc	32.5372	-0.223066	7.16e-20	2.08e-16	Negative	0.185016
DP	ZNF10	AluYc	32.5372	-0.207866	7.37e-280	4.42e-276	Negative	0.185016
Th17	ZNF10	AluYm1	31.7677	-0.301979	2.01e-44	5.92e-40	Negative	0.233285
DP	ZNF10	AluYm1	31.7677	-0.221373	4.54443557307362e-318	1.0125067377528e-313	Negative	0.233285
NK	ZNF10	AluYm1	31.7677	-0.278553	1.68e-30	1.65e-26	Negative	0.233285
NK	ZNF10	FLAM_A	84.7259	-0.213062	3.15e-18	7.12e-15	Negative	NA
Th17	ZNF10	FLAM_A	84.7259	-0.240424	2.64e-28	1.82e-24	Negative	NA
Th17	ZNF10	FLAM_C	74.2065	-0.255948	5.6e-32	4.77e-28	Negative	0.401613
NK	ZNF10	FLAM_C	74.2065	-0.251099	6.49e-25	2.69e-21	Negative	0.401613
NK	ZNF10	FRAM	84.0774	-0.203568	9.6e-17	1.96e-13	Negative	0
Th17	ZNF10	HAL1	125.034	-0.212234	2.81e-22	1.22e-18	Negative	0.00406588
NK	ZNF10	HAL1	125.034	-0.222064	1.05e-19	2.93e-16	Negative	0.00406588
DC	ZNF10	L1M1	77.7513	0.242201	1.18e-32	1.9e-28	Positive	0.114196
NK	ZNF10	L1M4	98.166	-0.203232	1.08e-16	2.19e-13	Negative	106.352
Th17	ZNF10	L1M4	98.166	-0.205679	5.42e-21	2.04e-17	Negative	106.352
NK	ZNF10	L1M5	125.324	-0.244609	1.09e-23	4.01e-20	Negative	57.9438
Th17	ZNF10	L1M5	125.324	-0.215459	6.32e-23	2.91e-19	Negative	57.9438
Th17	ZNF10	L1MA5	72.917	-0.237494	1.22e-27	8.22e-24	Negative	0
NK	ZNF10	L1MA9	83.3887	-0.206205	3.78e-17	7.82e-14	Negative	0.095589
Th17	ZNF10	L1MA9	83.3887	-0.218177	1.76e-23	8.37e-20	Negative	0.095589
NK	ZNF10	L1MB7	85.8397	-0.207951	2.02e-17	4.28e-14	Negative	137.996
NK	ZNF10	L1MC4	112.196	-0.217601	5.78e-19	1.45e-15	Negative	0.00301117
NK	ZNF10	L1MC5	106.058	-0.223024	7.27e-20	2.1e-16	Negative	0.0266435
NK	ZNF10	L1MC5a	114.044	-0.216966	7.35e-19	1.82e-15	Negative	0.583384
Th17	ZNF10	L1MD2	98.6221	-0.233991	7.4e-27	4.88e-23	Negative	NA
NK	ZNF10	L1MD2	98.6221	-0.237317	2.36e-22	8.37e-19	Negative	NA
NK	ZNF10	L1ME1	108.131	-0.208987	1.39e-17	2.99e-14	Negative	6.86175
NK	ZNF10	L1ME4a	121.444	-0.213511	2.66e-18	6.08e-15	Negative	NA
NK	ZNF10	L1ME4b	118.559	-0.208106	1.91e-17	4.08e-14	Negative	1.09765
Th17	ZNF10	L1PA10	46.9064	-0.201559	3.31e-20	1.17e-16	Negative	7.79795
NK	ZNF10	L1PA5	25.1912	-0.202383	1.45e-16	2.89e-13	Negative	9.25988
NK	ZNF10	L1PA7	35.9421	-0.212215	4.29e-18	9.64e-15	Negative	3.54482
Th17	ZNF10	L1PA7	35.9421	-0.212512	2.47e-22	1.1e-18	Negative	3.54482
NK	ZNF10	L2	144.256	-0.227141	1.45e-20	4.6e-17	Negative	NA
Th17	ZNF10	L2	144.256	-0.249246	2.32e-30	1.86e-26	Negative	NA
Th17	ZNF10	L2a	128.877	-0.225698	4.7e-25	2.9e-21	Negative	9.32e-07
NK	ZNF10	L2a	128.877	-0.228302	9.17e-21	2.93e-17	Negative	9.32e-07
NK	ZNF10	L2b	140.391	-0.221136	1.51e-19	4.1e-16	Negative	3.11e-06
Th17	ZNF10	L2b	140.391	-0.222736	1.99e-24	1.13e-20	Negative	3.11e-06
NK	ZNF10	L2c	140.977	-0.231559	2.49e-21	8.13e-18	Negative	1.86e-05
Th17	ZNF10	L2c	140.977	-0.220384	6.17e-24	2.98e-20	Negative	1.86e-05
DC	ZNF10	LTR12C	39.9183	0.270032	1.83e-40	5.06e-36	Positive	0
Th17	ZNF10	LTR12C	39.9183	0.242743	7.75e-29	5.48e-25	Positive	0
NK	ZNF10	LTR12C	39.9183	0.222427	9.16e-20	2.58e-16	Positive	0
NK	ZNF10	LTR12E	60.3288	0.223503	6.04e-20	1.78e-16	Positive	0
DC	ZNF10	LTR12E	60.3288	0.239663	5.48e-32	7.24e-28	Positive	0
Th17	ZNF10	LTR12E	60.3288	0.207182	2.77e-21	1.09e-17	Positive	0
DN	ZNF10	LTR12E	60.3288	0.201018	2.55e-303	3.98e-298	Positive	0
DC	ZNF10	LTR13	35.5762	0.237699	1.77e-31	2.24e-27	Positive	0
DC	ZNF10	MER21A	80.8104	0.231641	6.16e-30	6.69e-26	Positive	0
DC	ZNF10	MER52A	90.4387	0.230577	1.14e-29	1.19e-25	Positive	0
NK	ZNF10	MIR	124.913	-0.219553	2.76e-19	7.06e-16	Negative	NA
Th17	ZNF10	MIR	124.913	-0.212247	2.79e-22	1.22e-18	Negative	NA
Th17	ZNF10	MIRb	133.154	-0.203919	1.18e-20	4.33e-17	Negative	NA
NK	ZNF10	MIRb	133.154	-0.218709	3.8e-19	9.65e-16	Negative	NA
B_pro/pre	ZNF100	LTR33C	120.943	0.31088	0.000157433	0.0134179	Positive	NA
B_pro/pre	ZNF101	Harlequin-int	40.549	0.376356	3.61e-06	0.000545092	Positive	NA
B_pro/pre	ZNF101	L1ME3C	121.986	0.331779	5.17e-05	0.00543459	Positive	NA
B_pro/pre	ZNF107	L1M3b	120.512	0.280516	0.000690214	0.0425449	Positive	NA
B_pro/pre	ZNF107	L1MCc	124.911	0.288952	0.000465254	0.0304607	Positive	NA
B_pro/pre	ZNF107	L1PA12	60.2653	0.298989	0.00028635	0.0210227	Positive	NA
B_pro/pre	ZNF107	LTR101_Mam	140.156	0.300396	0.000267137	0.0202018	Positive	NA
B_pro/pre	ZNF107	LTR33A	125.443	0.301987	0.000246854	0.0187081	Positive	NA
B_pro/pre	ZNF107	MER52C	70.6911	0.2792	0.000733191	0.044581	Positive	NA
B_pro/pre	ZNF107	MER61B	74.0293	0.289854	0.000445712	0.0295114	Positive	NA
B_pro/pre	ZNF107	MER83C	77.1824	0.27622	0.000839812	0.049822	Positive	NA
B_pro/pre	ZNF107	THE1A	46.9465	0.29801	0.000300473	0.0218823	Positive	NA
Endothelial	ZNF121	AluJb	74.0772	0.225204	2.35e-14	1.36e-11	Positive	NA
mTEC	ZNF121	AluJb	74.0772	0.218816	4.18e-22	2.71e-19	Positive	NA
Endothelial	ZNF121	AluJo	74.3033	0.20311	6.67e-12	1.57e-09	Positive	NA
mTEC	ZNF121	AluJo	74.3033	0.210918	1.28e-20	6.67e-18	Positive	NA
Endothelial	ZNF121	AluJr	76.1277	0.215102	3.36e-13	1.24e-10	Positive	NA
mTEC	ZNF121	AluJr	76.1277	0.219039	3.79e-22	2.48e-19	Positive	NA
mTEC	ZNF121	AluJr4	78.2876	0.218489	4.83e-22	3.11e-19	Positive	NA
Endothelial	ZNF121	AluJr4	78.2876	0.220008	9.38e-14	4.37e-11	Positive	NA
Endothelial	ZNF121	AluSc	44.641	0.203837	5.6e-12	1.35e-09	Positive	NA
Endothelial	ZNF121	AluSc5	42.7187	0.233592	2.34e-15	1.92e-12	Positive	NA
mTEC	ZNF121	AluSc5	42.7187	0.207958	4.48e-20	2.14e-17	Positive	NA
Endothelial	ZNF121	AluSg	47.4948	0.225123	2.4e-14	1.39e-11	Positive	NA
mTEC	ZNF121	AluSg	47.4948	0.201636	6.06e-19	2.5e-16	Positive	NA
Endothelial	ZNF121	AluSg4	47.2738	0.211613	8.16e-13	2.57e-10	Positive	NA
mTEC	ZNF121	AluSg4	47.2738	0.210626	1.45e-20	7.47e-18	Positive	NA
Endothelial	ZNF121	AluSg7	41.787	0.226286	1.75e-14	1.06e-11	Positive	NA
mTEC	ZNF121	AluSp	43.9166	0.202595	4.1e-19	1.73e-16	Positive	NA
Endothelial	ZNF121	AluSp	43.9166	0.219852	9.77e-14	4.52e-11	Positive	NA
mTEC	ZNF121	AluSq	48.0285	0.205754	1.12e-19	5.09e-17	Positive	NA
mTEC	ZNF121	AluSq2	48.7649	0.212671	6.07e-21	3.3e-18	Positive	NA
Endothelial	ZNF121	AluSq2	48.7649	0.204482	4.78e-12	1.18e-09	Positive	NA
Endothelial	ZNF121	AluSq4	44.0339	0.258822	1.29e-18	2.67e-15	Positive	NA
mTEC	ZNF121	AluSx	52.8956	0.216121	1.37e-21	8.2e-19	Positive	NA
Endothelial	ZNF121	AluSx	52.8956	0.21142	8.57e-13	2.68e-10	Positive	NA
mTEC	ZNF121	AluSx1	51.2327	0.212798	5.75e-21	3.14e-18	Positive	NA
Endothelial	ZNF121	AluSx1	51.2327	0.239397	4.48e-16	4.37e-13	Positive	NA
mTEC	ZNF121	AluSx3	51.4459	0.211968	8.21e-21	4.37e-18	Positive	NA
Endothelial	ZNF121	AluSx3	51.4459	0.235244	1.47e-15	1.28e-12	Positive	NA
Endothelial	ZNF121	AluSx4	47.0711	0.223828	3.4e-14	1.84e-11	Positive	NA
Endothelial	ZNF121	AluSz	55.4724	0.212571	6.41e-13	2.1e-10	Positive	NA
mTEC	ZNF121	AluSz	55.4724	0.210709	1.4e-20	7.23e-18	Positive	NA
Endothelial	ZNF121	AluSz6	59.9588	0.203368	6.27e-12	1.49e-09	Positive	NA
mTEC	ZNF121	AluSz6	59.9588	0.207029	6.6e-20	3.09e-17	Positive	NA
mTEC	ZNF121	AluY	31.6825	0.220603	1.89e-22	1.3e-19	Positive	NA
Endothelial	ZNF121	AluY	31.6825	0.203461	6.13e-12	1.46e-09	Positive	NA
Endothelial	ZNF121	AluYb8	11.1883	0.220644	7.93e-14	3.78e-11	Positive	NA
Endothelial	ZNF121	AluYc	32.5372	0.218401	1.43e-13	6.06e-11	Positive	NA
Endothelial	ZNF121	AluYc3	29.0671	0.208667	1.71e-12	4.82e-10	Positive	NA
Endothelial	ZNF121	AluYf1	31.6853	0.262007	4.71e-19	1.16e-15	Positive	NA
Endothelial	ZNF121	AluYj4	45.4485	0.226829	1.51e-14	9.34e-12	Positive	NA
mTEC	ZNF121	AluYj4	45.4485	0.206857	7.09e-20	3.31e-17	Positive	NA
Endothelial	ZNF121	AluYk3	30.0545	0.216972	2.07e-13	8.24e-11	Positive	NA
Endothelial	ZNF121	AluYm1	31.7677	0.243794	1.25e-16	1.41e-13	Positive	NA
mTEC	ZNF121	FLAM_C	74.2065	0.204307	2.04e-19	8.98e-17	Positive	NA
Endothelial	ZNF121	FLAM_C	74.2065	0.228168	1.05e-14	6.81e-12	Positive	NA
Endothelial	ZNF121	FRAM	84.0774	0.206653	2.81e-12	7.46e-10	Positive	NA
mTEC	ZNF121	HAL1	125.034	0.212948	5.39e-21	2.96e-18	Positive	NA
Endothelial	ZNF121	HAL1	125.034	0.211937	7.52e-13	2.39e-10	Positive	NA
mTEC	ZNF121	HAL1b	124.652	0.201817	5.63e-19	2.33e-16	Positive	NA
Endothelial	ZNF121	L1M2a	102.588	0.230565	5.43e-15	3.91e-12	Positive	NA
mTEC	ZNF121	L1M4	98.166	0.21136	1.06e-20	5.6e-18	Positive	NA
mTEC	ZNF121	L1M4c	96.892	0.222032	9.97e-23	7.08e-20	Positive	NA
mTEC	ZNF121	L1M5	125.324	0.215637	1.69e-21	9.94e-19	Positive	NA
Endothelial	ZNF121	L1M5	125.324	0.212701	6.2e-13	2.05e-10	Positive	NA
Endothelial	ZNF121	L1M8	119.121	0.208532	1.77e-12	4.95e-10	Positive	NA
mTEC	ZNF121	L1MA4	76.4687	0.210926	1.28e-20	6.66e-18	Positive	NA
Endothelial	ZNF121	L1MA5	72.917	0.225532	2.15e-14	1.26e-11	Positive	NA
Endothelial	ZNF121	L1MA7	77.068	0.243034	1.56e-16	1.72e-13	Positive	NA
Endothelial	ZNF121	L1MA8	74.0797	0.213961	4.5e-13	1.59e-10	Positive	NA
Endothelial	ZNF121	L1MA9	83.3887	0.207582	2.24e-12	6.13e-10	Positive	NA
mTEC	ZNF121	L1MA9	83.3887	0.206366	8.7e-20	4e-17	Positive	NA
mTEC	ZNF121	L1MB1	82.4303	0.209409	2.43e-20	1.22e-17	Positive	NA
Endothelial	ZNF121	L1MB2	82.5759	0.223123	4.11e-14	2.15e-11	Positive	NA
mTEC	ZNF121	L1MB3	78.8028	0.211658	9.37e-21	4.95e-18	Positive	NA
mTEC	ZNF121	L1MB4	83.1707	0.212416	6.78e-21	3.66e-18	Positive	NA
mTEC	ZNF121	L1MB5	87.3712	0.204098	2.22e-19	9.73e-17	Positive	NA
mTEC	ZNF121	L1MB7	85.8397	0.215126	2.11e-21	1.22e-18	Positive	NA
Endothelial	ZNF121	L1MB7	85.8397	0.210025	1.22e-12	3.64e-10	Positive	NA
mTEC	ZNF121	L1MB8	86.387	0.215659	1.67e-21	9.86e-19	Positive	NA
mTEC	ZNF121	L1MC	105.833	0.209331	2.51e-20	1.25e-17	Positive	NA
mTEC	ZNF121	L1MC1	74.7836	0.213894	3.59e-21	2.01e-18	Positive	NA
mTEC	ZNF121	L1MC4	112.196	0.202766	3.83e-19	1.63e-16	Positive	NA
Endothelial	ZNF121	L1MC4	112.196	0.208661	1.71e-12	4.82e-10	Positive	NA
mTEC	ZNF121	L1MC4a	107.616	0.204657	1.76e-19	7.84e-17	Positive	NA
Endothelial	ZNF121	L1MC4a	107.616	0.203198	6.53e-12	1.54e-09	Positive	NA
Endothelial	ZNF121	L1MC5	106.058	0.212556	6.43e-13	2.1e-10	Positive	NA
mTEC	ZNF121	L1MC5	106.058	0.211434	1.03e-20	5.44e-18	Positive	NA
mTEC	ZNF121	L1MC5a	114.044	0.217016	9.23e-22	5.71e-19	Positive	NA
mTEC	ZNF121	L1MD2	98.6221	0.208608	3.41e-20	1.67e-17	Positive	NA
Endothelial	ZNF121	L1MD2	98.6221	0.204254	5.06e-12	1.24e-09	Positive	NA
Endothelial	ZNF121	L1ME1	108.131	0.21511	3.35e-13	1.23e-10	Positive	NA
mTEC	ZNF121	L1ME1	108.131	0.210433	1.58e-20	8.06e-18	Positive	NA
mTEC	ZNF121	L1ME3A	112.949	0.20347	2.87e-19	1.24e-16	Positive	NA
mTEC	ZNF121	L1ME3Cz	119.085	0.224065	3.98e-23	3.01e-20	Positive	NA
Endothelial	ZNF121	L1ME3Cz	119.085	0.200344	1.3e-11	2.75e-09	Positive	NA
mTEC	ZNF121	L1ME3F	120.613	0.23011	2.46e-24	2.24e-21	Positive	NA
mTEC	ZNF121	L1ME3G	122.931	0.204143	2.18e-19	9.56e-17	Positive	NA
mTEC	ZNF121	L1ME4a	121.444	0.220136	2.33e-22	1.56e-19	Positive	NA
Endothelial	ZNF121	L1ME4a	121.444	0.200851	1.15e-11	2.47e-09	Positive	NA
mTEC	ZNF121	L1ME4b	118.559	0.215777	1.59e-21	9.4e-19	Positive	NA
Endothelial	ZNF121	L1ME4b	118.559	0.205424	3.8e-12	9.64e-10	Positive	NA
Endothelial	ZNF121	L1ME4c	124.085	0.206131	3.2e-12	8.3e-10	Positive	NA
mTEC	ZNF121	L1MEc	112.594	0.21385	3.66e-21	2.05e-18	Positive	NA
Endothelial	ZNF121	L1MEc	112.594	0.208969	1.58e-12	4.54e-10	Positive	NA
mTEC	ZNF121	L1MEd	129.082	0.22294	6.62e-23	4.84e-20	Positive	NA
Endothelial	ZNF121	L1MEd	129.082	0.211117	9.25e-13	2.87e-10	Positive	NA
mTEC	ZNF121	L1MEf	118.108	0.234779	2.71e-25	2.71e-22	Positive	NA
mTEC	ZNF121	L1MEg	122.683	0.211358	1.07e-20	5.6e-18	Positive	NA
mTEC	ZNF121	L1PA13	53.5063	0.220388	2.08e-22	1.41e-19	Positive	NA
mTEC	ZNF121	L1PA16	65.3723	0.221282	1.39e-22	9.78e-20	Positive	NA
Endothelial	ZNF121	L1PA3	16.059	0.210803	1e-12	3.08e-10	Positive	NA
Endothelial	ZNF121	L1PA4	19.8347	0.224911	2.54e-14	1.45e-11	Positive	NA
Endothelial	ZNF121	L1PA7	35.9421	0.201415	1e-11	2.19e-09	Positive	NA
mTEC	ZNF121	L1PA7	35.9421	0.200615	9.15e-19	3.72e-16	Positive	NA
Endothelial	ZNF121	L1PA8	39.415	0.20771	2.17e-12	5.95e-10	Positive	NA
Endothelial	ZNF121	L1PB1	49.1044	0.209378	1.43e-12	4.17e-10	Positive	NA
mTEC	ZNF121	L1PB3	67.6083	0.209283	2.57e-20	1.28e-17	Positive	NA
Endothelial	ZNF121	L1PREC2	57.7129	0.206551	2.88e-12	7.58e-10	Positive	NA
mTEC	ZNF121	L1PREC2	57.7129	0.21095	1.27e-20	6.61e-18	Positive	NA
Endothelial	ZNF121	L2	144.256	0.232509	3.16e-15	2.46e-12	Positive	NA
B_pro/pre	ZNF121	L2	144.256	0.276277	0.000837637	0.0497683	Positive	NA
mTEC	ZNF121	L2	144.256	0.222123	9.57e-23	6.82e-20	Positive	NA
Endothelial	ZNF121	L2a	128.877	0.211904	7.58e-13	2.41e-10	Positive	NA
mTEC	ZNF121	L2a	128.877	0.219919	2.56e-22	1.7e-19	Positive	NA
mTEC	ZNF121	L2b	140.391	0.205729	1.13e-19	5.13e-17	Positive	NA
mTEC	ZNF121	L2c	140.977	0.218317	5.21e-22	3.35e-19	Positive	NA
Endothelial	ZNF121	L2c	140.977	0.200027	1.4e-11	2.92e-09	Positive	NA
mTEC	ZNF121	L4_A_Mam	135.189	0.203161	3.26e-19	1.4e-16	Positive	NA
B_pro/pre	ZNF121	LTR10D	47.5494	0.288401	0.000477568	0.0312378	Positive	NA
B_pro/pre	ZNF121	LTR16B	122.415	0.324921	7.51e-05	0.00727283	Positive	NA
B_pro/pre	ZNF121	LTR25	87.6329	0.290659	0.000428926	0.0291399	Positive	NA
B_pro/pre	ZNF121	MER50	71.6856	0.299153	0.00028405	0.0209195	Positive	NA
Endothelial	ZNF121	MIR	124.913	0.204838	4.39e-12	1.1e-09	Positive	NA
mTEC	ZNF121	MIR	124.913	0.216349	1.24e-21	7.47e-19	Positive	NA
mTEC	ZNF121	MIR3	131.719	0.200033	1.16e-18	4.64e-16	Positive	NA
mTEC	ZNF121	MIRb	133.154	0.207683	5.03e-20	2.38e-17	Positive	NA
Endothelial	ZNF121	MIRb	133.154	0.213333	5.28e-13	1.8e-10	Positive	NA
gd T	ZNF195	L1M6	132.317	0.206308	4.32e-05	0.000592554	Positive	NA
gd T	ZNF195	L1MC1	74.7836	0.205413	4.67e-05	0.00063529	Positive	NA
gd T	ZNF195	LTR4	72.4142	0.238529	2.08e-06	3.98e-05	Positive	NA
B_pro/pre	ZNF254	LTR1B1	69.7004	0.327065	6.69e-05	0.00664293	Positive	NA
B_pro/pre	ZNF254	MER84	64.3462	0.340079	3.24e-05	0.00373101	Positive	NA
Mono/Macro	ZNF267	ERV3-16A3_LTR	126.998	0.330301	2.88e-06	0.000256225	Positive	NA
Mono/Macro	ZNF267	L1M3d	124.85	0.283547	6.74e-05	0.00388967	Positive	NA
Mono/Macro	ZNF267	L1PA3	16.059	0.258612	0.00029251	0.0126246	Positive	0
Mono/Macro	ZNF267	L1PA6	32.4337	0.285519	5.96e-05	0.00351341	Positive	0
Mono/Macro	ZNF267	LTR103_Mam	132.234	0.297187	2.84e-05	0.00183637	Positive	NA
Mono/Macro	ZNF267	LTR16A1	117.899	0.231885	0.00121071	0.0393201	Positive	NA
Mono/Macro	ZNF267	LTR16C	125.304	0.288741	4.87e-05	0.00292694	Positive	NA
Mono/Macro	ZNF267	LTR1A2	57.3258	0.326848	3.71e-06	0.000323902	Positive	0
Mono/Macro	ZNF267	LTR1B1	69.7004	0.226947	0.00154796	0.0469553	Positive	NA
Mono/Macro	ZNF267	MER41C	58.9347	0.22877	0.00141453	0.0441612	Positive	NA
Mono/Macro	ZNF267	MER84	64.3462	0.256735	0.00032484	0.013881	Positive	NA
Mono/Macro	ZNF267	MIR3	131.719	0.242657	0.000695824	0.0259631	Positive	NA
Mono/Macro	ZNF267	MLT2B2	84.2407	0.229135	0.00138914	0.0436192	Positive	NA
Mono/Macro	ZNF267	THE1B-int	48.322	0.243324	0.00067179	0.0253234	Positive	NA
B_pro/pre	ZNF274	LTR26B	67.191	0.383046	2.34e-06	0.00036361	Positive	NA
B_pro/pre	ZNF274	MER51C	61.239	0.37363	4.3e-06	0.000634397	Positive	NA
B_pro/pre	ZNF274	MLT1I-int	138.978	0.315834	0.000121787	0.011036	Positive	NA
gd T	ZNF302	CR1-16_AMi	118.979	0.235999	2.68e-06	4.95e-05	Positive	NA
gd T	ZNF302	HERV9NC-int	36.4412	0.277003	3.02e-08	8.2e-07	Positive	NA
gd T	ZNF302	HERVH-int	56.4142	0.210091	3.1e-05	0.000439564	Positive	NA
gd T	ZNF302	HERVL40-int	123.296	0.210721	2.93e-05	0.000422593	Positive	NA
gd T	ZNF302	L1M2a	102.588	0.240961	1.62e-06	3.22e-05	Positive	0
gd T	ZNF302	L1MC4a	107.616	0.204036	5.27e-05	0.00070483	Positive	0
gd T	ZNF302	L1MD3	95.5523	0.264616	1.27e-07	3.18e-06	Positive	NA
Endothelial	ZNF302	L1MD3	95.5523	0.21043	1.1e-12	3.36e-10	Positive	NA
gd T	ZNF302	L1ME4b	118.559	0.217212	1.63e-05	0.000253245	Positive	0
gd T	ZNF302	L1P4	68.8132	0.200351	7.22e-05	0.000940286	Positive	0
gd T	ZNF302	L1P4a	88.1761	0.210264	3.05e-05	0.000433839	Positive	NA
gd T	ZNF302	L1PA2	10.8815	0.209149	3.37e-05	0.000472602	Positive	0
Endothelial	ZNF302	L1PA3	16.059	0.200643	1.21e-11	2.58e-09	Positive	0
gd T	ZNF302	LTR19-int	54.4683	0.231062	4.37e-06	7.85e-05	Positive	NA
gd T	ZNF302	LTR1A1	64.2091	0.207184	4e-05	0.00055366	Positive	0
gd T	ZNF302	LTR70	68.3276	0.234935	2.98e-06	5.45e-05	Positive	NA
gd T	ZNF302	MER34A1	90.8126	0.235024	2.95e-06	5.41e-05	Positive	NA
gd T	ZNF302	MER4A1_	53.1916	0.232561	3.77e-06	6.83e-05	Positive	0
gd T	ZNF302	MER51-int	63.2791	0.210574	2.97e-05	0.000426366	Positive	NA
gd T	ZNF302	MER90a	108.289	0.237058	2.41e-06	4.49e-05	Positive	NA
gd T	ZNF302	MLT1G3	116.77	0.20126	6.68e-05	0.000878823	Positive	0
NK	ZNF331	AluJb	74.0772	-0.280895	5.22e-31	5.48e-27	Negative	0
Mono/Macro	ZNF331	AluJb	74.0772	-0.260371	0.000264942	0.0115727	Negative	0
Treg	ZNF331	AluJb	74.0772	0.241277	1.27e-11	1.39e-08	Positive	0
NK	ZNF331	AluJo	74.3033	-0.259132	1.76e-26	9.08e-23	Negative	0.0208067
Treg	ZNF331	AluJo	74.3033	0.229236	1.33e-10	1.15e-07	Positive	0.0208067
Mono/Macro	ZNF331	AluJo	74.3033	-0.230847	0.00127546	0.0408986	Negative	0.0208067
NK	ZNF331	AluJr	76.1277	-0.285836	4.28e-32	5.03e-28	Negative	1.07e-06
Treg	ZNF331	AluJr	76.1277	0.226955	2.04e-10	1.7e-07	Positive	1.07e-06
Treg	ZNF331	AluJr4	78.2876	0.219275	8.37e-10	6.18e-07	Positive	0
NK	ZNF331	AluJr4	78.2876	-0.250297	9.24e-25	3.67e-21	Negative	0
NK	ZNF331	AluSc	44.641	-0.269053	1.71e-28	1.23e-24	Negative	0
Treg	ZNF331	AluSc	44.641	0.243067	8.9e-12	9.87e-09	Positive	0
NK	ZNF331	AluSc5	42.7187	-0.207765	2.16e-17	4.54e-14	Negative	NA
Treg	ZNF331	AluSc5	42.7187	0.232783	6.75e-11	6.49e-08	Positive	NA
Treg	ZNF331	AluSc8	44.9004	0.275022	8.89e-15	1.73e-11	Positive	0
NK	ZNF331	AluSc8	44.9004	-0.252743	3.13e-25	1.34e-21	Negative	0
Treg	ZNF331	AluSg	47.4948	0.24936	2.46e-12	3.06e-09	Positive	0
NK	ZNF331	AluSg	47.4948	-0.302908	5.08e-36	1.25e-31	Negative	0
Treg	ZNF331	AluSg4	47.2738	0.236489	3.29e-11	3.37e-08	Positive	0
NK	ZNF331	AluSg4	47.2738	-0.253059	2.72e-25	1.18e-21	Negative	0
Treg	ZNF331	AluSg7	41.787	0.247885	3.33e-12	4.04e-09	Positive	0
NK	ZNF331	AluSg7	41.787	-0.261971	4.76e-27	2.64e-23	Negative	0
Mono/Macro	ZNF331	AluSp	43.9166	-0.234952	0.00103672	0.0349221	Negative	0
NK	ZNF331	AluSp	43.9166	-0.287272	2.05e-32	2.89e-28	Negative	0
Treg	ZNF331	AluSp	43.9166	0.252496	1.28e-12	1.66e-09	Positive	0
Treg	ZNF331	AluSq	48.0285	0.234666	4.69e-11	4.73e-08	Positive	0
NK	ZNF331	AluSq	48.0285	-0.27708	3.48e-30	3.3e-26	Negative	0
Mono/Macro	ZNF331	AluSq2	48.7649	-0.226483	0.00158371	0.0478892	Negative	0
Treg	ZNF331	AluSq2	48.7649	0.249064	2.61e-12	3.22e-09	Positive	0
NK	ZNF331	AluSq2	48.7649	-0.299673	2.95e-35	6.68e-31	Negative	0
Treg	ZNF331	AluSx	52.8956	0.232069	7.74e-11	7.35e-08	Positive	2.01e-05
NK	ZNF331	AluSx	52.8956	-0.276153	5.49e-30	4.9e-26	Negative	2.01e-05
NK	ZNF331	AluSx1	51.2327	-0.271227	6.03e-29	4.43e-25	Negative	8.41e-07
Treg	ZNF331	AluSx1	51.2327	0.261897	1.7e-13	2.75e-10	Positive	8.41e-07
NK	ZNF331	AluSx3	51.4459	-0.268475	2.25e-28	1.57e-24	Negative	0
Treg	ZNF331	AluSx3	51.4459	0.239986	1.65e-11	1.78e-08	Positive	0
Treg	ZNF331	AluSx4	47.0711	0.224219	3.39e-10	2.73e-07	Positive	0
NK	ZNF331	AluSx4	47.0711	-0.254725	1.29e-25	5.94e-22	Negative	0
Treg	ZNF331	AluSz	55.4724	0.263529	1.19e-13	2.02e-10	Positive	2.26e-07
NK	ZNF331	AluSz	55.4724	-0.289729	5.75e-33	1.06e-28	Negative	2.26e-07
Treg	ZNF331	AluSz6	59.9588	0.244787	6.28e-12	7.29e-09	Positive	0.00339768
NK	ZNF331	AluSz6	59.9588	-0.280637	5.94e-31	6.02e-27	Negative	0.00339768
Treg	ZNF331	AluY	31.6825	0.2631	1.31e-13	2.19e-10	Positive	0
NK	ZNF331	AluY	31.6825	-0.274748	1.09e-29	9.19e-26	Negative	0
Treg	ZNF331	AluYa5	6.77491	0.278298	4.15e-15	8.3e-12	Positive	0
Treg	ZNF331	AluYb8	11.1883	0.225464	2.69e-10	2.21e-07	Positive	0
NK	ZNF331	AluYc	32.5372	-0.205334	5.15e-17	1.06e-13	Negative	0.309178
Treg	ZNF331	AluYc	32.5372	0.221829	5.26e-10	4.1e-07	Positive	0.309178
Treg	ZNF331	AluYf1	31.6853	0.23722	2.85e-11	2.95e-08	Positive	0
Treg	ZNF331	AluYg6	31.0589	0.214642	1.91e-09	1.26e-06	Positive	0
Treg	ZNF331	AluYj4	45.4485	0.213869	2.19e-09	1.43e-06	Positive	0
Treg	ZNF331	AluYm1	31.7677	0.254627	8.15e-13	1.15e-09	Positive	0
NK	ZNF331	AluYm1	31.7677	-0.215586	1.23e-18	2.97e-15	Negative	0
Treg	ZNF331	FLAM_A	84.7259	0.202634	1.5e-08	7.94e-06	Positive	NA
Treg	ZNF331	FLAM_C	74.2065	0.224876	3e-10	2.44e-07	Positive	0.223707
Treg	ZNF331	FRAM	84.0774	0.208647	5.43e-09	3.17e-06	Positive	0
Treg	ZNF331	HAL1	125.034	0.206761	7.5e-09	4.23e-06	Positive	0
NK	ZNF331	HAL1	125.034	-0.223599	5.82e-20	1.73e-16	Negative	0
DC	ZNF331	Harlequin-int	40.549	0.398797	3.09e-90	1.57e-85	Positive	NA
DC	ZNF331	L1HS	8.85418	0.260419	1.17e-37	2.38e-33	Positive	0
Treg	ZNF331	L1HS	8.85418	0.261488	1.86e-13	2.85e-10	Positive	0
CD4 SP	ZNF331	L1M1	77.7513	0.207623	0	0	Positive	0
DC	ZNF331	L1M1	77.7513	0.363345	4.17e-74	1.59e-69	Positive	0
DC	ZNF331	L1M3d	124.85	0.385475	6.12e-84	2.66e-79	Positive	NA
Treg	ZNF331	L1M4	98.166	0.220011	7.33e-10	5.5e-07	Positive	0
Treg	ZNF331	L1M5	125.324	0.239272	1.9e-11	2.03e-08	Positive	0
NK	ZNF331	L1M5	125.324	-0.215563	1.24e-18	2.97e-15	Negative	0
DC	ZNF331	L1M6B	130.209	0.212981	1.85e-25	1.44e-21	Positive	NA
Treg	ZNF331	L1M8	119.121	0.201224	1.89e-08	9.82e-06	Positive	0
Treg	ZNF331	L1MA2	56.0415	0.211334	3.42e-09	2.08e-06	Positive	0
Treg	ZNF331	L1MA3	60.3342	0.216908	1.28e-09	8.76e-07	Positive	0
Treg	ZNF331	L1MA4A	73.5283	0.202233	1.6e-08	8.45e-06	Positive	0
Treg	ZNF331	L1MA5	72.917	0.226605	2.18e-10	1.8e-07	Positive	0
Treg	ZNF331	L1MA9	83.3887	0.215459	1.66e-09	1.11e-06	Positive	0
NK	ZNF331	L1MB3	78.8028	-0.225196	3.12e-20	9.47e-17	Negative	NA
Treg	ZNF331	L1MB3	78.8028	0.228875	1.42e-10	1.22e-07	Positive	NA
Treg	ZNF331	L1MB5	87.3712	0.217013	1.26e-09	8.66e-07	Positive	0
NK	ZNF331	L1MB7	85.8397	-0.231802	2.26e-21	7.46e-18	Negative	0
Treg	ZNF331	L1MB7	85.8397	0.207884	6.19e-09	3.56e-06	Positive	0
Treg	ZNF331	L1MB8	86.387	0.203097	1.39e-08	7.41e-06	Positive	0
NK	ZNF331	L1MB8	86.387	-0.214425	1.9e-18	4.4e-15	Negative	0
Treg	ZNF331	L1MC1	74.7836	0.203976	1.2e-08	6.46e-06	Positive	0
Treg	ZNF331	L1MC3	92.544	0.216992	1.26e-09	8.67e-07	Positive	0
Treg	ZNF331	L1MC4	112.196	0.211965	3.06e-09	1.91e-06	Positive	0
NK	ZNF331	L1MC5	106.058	-0.222413	9.21e-20	2.58e-16	Negative	0
NK	ZNF331	L1MC5a	114.044	-0.200481	2.82e-16	5.31e-13	Negative	0
DC	ZNF331	L1MCa	96.2839	0.224986	2.71e-28	2.58e-24	Positive	0
Treg	ZNF331	L1MD1	87.6221	0.21188	3.11e-09	1.92e-06	Positive	NA
Treg	ZNF331	L1MD2	98.6221	0.237428	2.73e-11	2.85e-08	Positive	NA
NK	ZNF331	L1MD2	98.6221	-0.207608	2.29e-17	4.77e-14	Negative	NA
NK	ZNF331	L1ME1	108.131	-0.210548	7.9e-18	1.72e-14	Negative	0.00205045
Treg	ZNF331	L1ME2	111.434	0.230492	1.05e-10	9.38e-08	Positive	NA
Treg	ZNF331	L1ME3A	112.949	0.222196	4.92e-10	3.87e-07	Positive	0
Treg	ZNF331	L1ME3B	119.132	0.209255	4.89e-09	2.86e-06	Positive	NA
Treg	ZNF331	L1ME3E	122.281	0.212185	2.95e-09	1.85e-06	Positive	NA
Treg	ZNF331	L1ME4a	121.444	0.202813	1.46e-08	7.73e-06	Positive	NA
Treg	ZNF331	L1ME4b	118.559	0.209709	4.53e-09	2.68e-06	Positive	0
Treg	ZNF331	L1MEd	129.082	0.248747	2.79e-12	3.43e-09	Positive	0
Treg	ZNF331	L1MEg	122.683	0.24409	7.24e-12	8.26e-09	Positive	0
DC	ZNF331	L1MEg1	128.816	0.212355	2.57e-25	1.91e-21	Positive	NA
DC	ZNF331	L1P3	46.9838	0.205867	7.35e-24	3.86e-20	Positive	0
Treg	ZNF331	L1PA10	46.9064	0.21899	8.81e-10	6.49e-07	Positive	0
Treg	ZNF331	L1PA11	48.8229	0.211029	3.6e-09	2.19e-06	Positive	0
DC	ZNF331	L1PA12	60.2653	0.203011	3.11e-23	1.6e-19	Positive	0
Treg	ZNF331	L1PA13	53.5063	0.20544	9.37e-09	5.19e-06	Positive	0
Treg	ZNF331	L1PA15	65.5369	0.222302	4.83e-10	3.82e-07	Positive	0
Treg	ZNF331	L1PA4	19.8347	0.255172	7.26e-13	1.03e-09	Positive	0
Treg	ZNF331	L1PA5	25.1912	0.251136	1.7e-12	2.16e-09	Positive	0
Treg	ZNF331	L1PA6	32.4337	0.22872	1.46e-10	1.25e-07	Positive	0
Treg	ZNF331	L1PA7	35.9421	0.27203	1.77e-14	3.28e-11	Positive	0
Treg	ZNF331	L1PB1	49.1044	0.240609	1.46e-11	1.58e-08	Positive	0.00965511
DC	ZNF331	L1PB4	79.3564	0.244487	2.93e-33	4.96e-29	Positive	NA
NK	ZNF331	L2	144.256	-0.21549	1.28e-18	3.03e-15	Negative	NA
Treg	ZNF331	L2	144.256	0.228517	1.52e-10	1.29e-07	Positive	NA
NK	ZNF331	L2a	128.877	-0.272996	2.56e-29	2.04e-25	Negative	4e-07
Treg	ZNF331	L2a	128.877	0.203622	1.27e-08	6.84e-06	Positive	4e-07
NK	ZNF331	L2b	140.391	-0.265809	7.95e-28	4.97e-24	Negative	0.00216655
NK	ZNF331	L2c	140.977	-0.260393	9.86e-27	5.28e-23	Negative	8.2e-05
NK	ZNF331	L3	141.644	-0.220984	1.6e-19	4.27e-16	Negative	NA
DC	ZNF331	LOR1-int	73.8203	0.235862	5.25e-31	6.39e-27	Positive	NA
DC	ZNF331	LTR13	35.5762	0.228341	4.08e-29	4.14e-25	Positive	0
DC	ZNF331	LTR14A	32.1263	0.265626	3.66e-39	8.68e-35	Positive	0
DC	ZNF331	LTR22B	62.4916	0.250717	6.09e-35	1.16e-30	Positive	NA
NK	ZNF331	LTR26C	74.5387	0.226936	1.57e-20	4.88e-17	Positive	0
B cell	ZNF331	LTR26C	74.5387	0.208506	3.88e-15	8.05e-12	Positive	0
DC	ZNF331	LTR26C	74.5387	0.454998	3.48e-120	5.3e-115	Positive	0
Mono/Macro	ZNF331	LTR26C	74.5387	0.367971	1.51e-07	2.06e-05	Positive	0
DC	ZNF331	LTR2B	36.7687	0.24055	3.21e-32	4.89e-28	Positive	NA
Treg	ZNF331	LTR5_Hs	32.5359	0.228202	1.61e-10	1.36e-07	Positive	0
DC	ZNF331	LTR75	106.225	0.208704	1.72e-24	1.07e-20	Positive	NA
DC	ZNF331	LTR8	67.7554	0.249609	1.22e-34	2.19e-30	Positive	0
CD4 SP	ZNF331	MER21A	80.8104	0.227729	0	0	Positive	0
DC	ZNF331	MER21A	80.8104	0.235678	5.85e-31	6.84e-27	Positive	0
DC	ZNF331	MER4CL34	78.732	0.239904	4.74e-32	6.55e-28	Positive	0
Mono/Macro	ZNF331	MER57C1	85.1739	0.252014	0.000421429	0.0172869	Positive	0
DC	ZNF331	MER65D	98.2623	0.23259	3.56e-30	4.01e-26	Positive	NA
B cell	ZNF331	MER77B	103.517	0.28414	2.91e-27	2.36e-23	Positive	0
CD4 SP	ZNF331	MER77B	103.517	0.222705	0	0	Positive	0
DC	ZNF331	MER77B	103.517	0.449044	9.76e-117	9.89e-112	Positive	0
NK	ZNF331	MER77B	103.517	0.296563	1.57e-34	3.08e-30	Positive	0
Mono/Macro	ZNF331	MER83C	77.1824	0.236469	0.000959409	0.0331388	Positive	NA
NK	ZNF331	MIR	124.913	-0.288013	1.4e-32	2.28e-28	Negative	NA
NK	ZNF331	MIR3	131.719	-0.22073	1.76e-19	4.67e-16	Negative	NA
NK	ZNF331	MIRb	133.154	-0.256245	6.53e-26	3.1e-22	Negative	NA
NK	ZNF331	MIRc	130.519	-0.267096	4.33e-28	2.89e-24	Negative	NA
gd T	ZNF33A	MER34A	96.2873	0.222611	9.84e-06	0.000159997	Positive	0
gd T	ZNF33A	MER4CL34	78.732	0.28187	1.68e-08	5.31e-07	Positive	0
gd T	ZNF33A	MER89-int	126.866	0.238604	2.06e-06	3.95e-05	Positive	NA
B_pro/pre	ZNF350	LTR19B	51.0419	0.290026	0.000442089	0.0292992	Positive	NA
B_pro/pre	ZNF350	MSTC-int	111.524	0.385149	2.04e-06	0.00031842	Positive	NA
VSMC	ZNF43	MER57E3	85.2026	0.213215	1.89e-09	1.65e-06	Positive	NA
B_pro/pre	ZNF43	MER83B-int	84.771	0.436708	4.96e-08	1.39e-05	Positive	NA
B_pro/pre	ZNF43	MLT2C1	94.708	0.348595	1.98e-05	0.00247555	Positive	NA
B_pro/pre	ZNF430	AluSg	47.4948	-0.285792	0.000540114	0.0348528	Negative	0
B_pro/pre	ZNF430	AluSx	52.8956	-0.277612	0.000788357	0.0476329	Negative	0
Mono/Macro	ZNF430	AluYi6_4d	36.7825	0.228303	0.00144772	0.044883	Positive	NA
Mono/Macro	ZNF430	HERV3-int	98.1176	0.269199	0.000159549	0.00765172	Positive	NA
Mono/Macro	ZNF430	L1M3a	129.405	0.251083	0.000443353	0.0180475	Positive	NA
Mono/Macro	ZNF430	L1M6	132.317	0.251818	0.000425948	0.0174511	Positive	NA
Mono/Macro	ZNF430	L1MA1	51.4267	0.260424	0.000264154	0.0115433	Positive	NA
Mono/Macro	ZNF430	L1PA15	65.5369	0.253195	0.000395037	0.0163934	Positive	0
Mono/Macro	ZNF430	L1PB4	79.3564	0.262078	0.000240531	0.0106186	Positive	NA
Mono/Macro	ZNF430	L4_A_Mam	135.189	0.232324	0.0011843	0.0385734	Positive	NA
B_pro/pre	ZNF430	LTR106_Mam	112.669	0.305614	0.000205834	0.0164204	Positive	NA
Mono/Macro	ZNF430	LTR16A2	120.091	0.227725	0.00148965	0.0460058	Positive	0
Mono/Macro	ZNF430	LTR16D1	131.421	0.307351	1.45e-05	0.0010539	Positive	NA
Mono/Macro	ZNF430	LTR16E1	128.611	0.302432	2.01e-05	0.00137669	Positive	NA
Mono/Macro	ZNF430	LTR22B	62.4916	0.25476	0.000362436	0.0152497	Positive	NA
Mono/Macro	ZNF430	LTR35	71.2626	0.29514	3.24e-05	0.00203169	Positive	NA
Mono/Macro	ZNF430	LTR45B	76.834	0.231556	0.00123094	0.0398149	Positive	NA
Mono/Macro	ZNF430	LTR5B	48.7367	0.228109	0.00146162	0.0452849	Positive	0
Mono/Macro	ZNF430	MamGypLTR2b	124.648	0.242937	0.000685649	0.0256212	Positive	NA
Mono/Macro	ZNF430	MER11D	25.7929	0.227343	0.00151805	0.0463843	Positive	0
Mono/Macro	ZNF430	MER21A	80.8104	0.342635	1.15e-06	0.000124363	Positive	0
Mono/Macro	ZNF430	MER41C	58.9347	0.294136	3.46e-05	0.00216062	Positive	NA
B_pro/pre	ZNF430	MER57B1	58.9358	0.337034	3.85e-05	0.00433711	Positive	0
Mono/Macro	ZNF430	MER65C	86.2613	0.251062	0.00044386	0.0180645	Positive	0
Mono/Macro	ZNF430	MLT1J2-int	131.036	0.301705	2.11e-05	0.00144261	Positive	NA
Mono/Macro	ZNF430	MSTD-int	107.312	0.258673	0.000291507	0.012584	Positive	NA
B_pro/pre	ZNF430	PABL_A	42.034	0.279064	0.00073778	0.0448383	Positive	0
B_pro/pre	ZNF431	L1ME3G	122.931	0.303729	0.000226286	0.0174455	Positive	NA
B_pro/pre	ZNF431	LTR50	109.652	0.279327	0.000728956	0.0443619	Positive	0.975214
B_pro/pre	ZNF431	MLT1C	97.8746	0.283301	0.000606768	0.0381906	Positive	NA
mTEC	ZNF433	AluJb	74.0772	0.22965	3.05e-24	2.71e-21	Positive	1.46e-05
mTEC	ZNF433	AluJo	74.3033	0.226557	1.28e-23	1.03e-20	Positive	0.0229844
mTEC	ZNF433	AluJr	76.1277	0.231406	1.34e-24	1.25e-21	Positive	9.98e-05
mTEC	ZNF433	AluJr4	78.2876	0.226365	1.39e-23	1.11e-20	Positive	0
mTEC	ZNF433	AluSc	44.641	0.225465	2.1e-23	1.64e-20	Positive	0
mTEC	ZNF433	AluSc5	42.7187	0.220146	2.32e-22	1.56e-19	Positive	NA
mTEC	ZNF433	AluSc8	44.9004	0.232755	7.09e-25	6.75e-22	Positive	0.0172852
mTEC	ZNF433	AluSg	47.4948	0.228897	4.33e-24	3.74e-21	Positive	0
mTEC	ZNF433	AluSg4	47.2738	0.220252	2.21e-22	1.49e-19	Positive	0.2909
mTEC	ZNF433	AluSg7	41.787	0.236407	1.24e-25	1.32e-22	Positive	0
mTEC	ZNF433	AluSp	43.9166	0.228368	5.53e-24	4.73e-21	Positive	0.00105664
mTEC	ZNF433	AluSq	48.0285	0.216411	1.2e-21	7.3e-19	Positive	0
mTEC	ZNF433	AluSq10	44.57	0.226155	1.53e-23	1.21e-20	Positive	NA
mTEC	ZNF433	AluSq2	48.7649	0.239376	2.95e-26	3.49e-23	Positive	0.00529488
mTEC	ZNF433	AluSq4	44.0339	0.206369	8.69e-20	4e-17	Positive	NA
mTEC	ZNF433	AluSx	52.8956	0.236158	1.4e-25	1.48e-22	Positive	4.41e-08
mTEC	ZNF433	AluSx1	51.2327	0.235636	1.8e-25	1.88e-22	Positive	0
mTEC	ZNF433	AluSx3	51.4459	0.2276	7.89e-24	6.53e-21	Positive	0.00155779
mTEC	ZNF433	AluSx4	47.0711	0.237875	6.12e-26	6.92e-23	Positive	0.0760818
mTEC	ZNF433	AluSz	55.4724	0.235213	2.2e-25	2.26e-22	Positive	6.19e-07
mTEC	ZNF433	AluSz6	59.9588	0.223054	6.29e-23	4.62e-20	Positive	0
mTEC	ZNF433	AluY	31.6825	0.229342	3.52e-24	3.1e-21	Positive	5.06e-08
mTEC	ZNF433	AluYa5	6.77491	0.208361	3.78e-20	1.83e-17	Positive	0.341765
mTEC	ZNF433	AluYc	32.5372	0.207726	4.93e-20	2.34e-17	Positive	0.234287
mTEC	ZNF433	AluYf1	31.6853	0.21525	2e-21	1.16e-18	Positive	0
mTEC	ZNF433	AluYk2	31.1687	0.209377	2.47e-20	1.23e-17	Positive	0
mTEC	ZNF433	AluYk3	30.0545	0.208189	4.07e-20	1.96e-17	Positive	0
mTEC	ZNF433	AluYk4	27.0219	0.220545	1.94e-22	1.33e-19	Positive	NA
mTEC	ZNF433	AluYm1	31.7677	0.223637	4.83e-23	3.62e-20	Positive	0
mTEC	ZNF433	FLAM_C	74.2065	0.219014	3.83e-22	2.5e-19	Positive	0.0332513
mTEC	ZNF433	HAL1	125.034	0.217355	7.96e-22	4.97e-19	Positive	0.00858522
mTEC	ZNF433	L1M2	90.312	0.210342	1.64e-20	8.33e-18	Positive	0
mTEC	ZNF433	L1M3	86.3375	0.200035	1.16e-18	4.64e-16	Positive	0.143323
mTEC	ZNF433	L1M4	98.166	0.202338	4.56e-19	1.91e-16	Positive	0.00861284
mTEC	ZNF433	L1M4a1	115.816	0.210104	1.81e-20	9.18e-18	Positive	0
mTEC	ZNF433	L1M5	125.324	0.209122	2.75e-20	1.36e-17	Positive	0
mTEC	ZNF433	L1MA4	76.4687	0.211724	9.11e-21	4.83e-18	Positive	0
mTEC	ZNF433	L1MB1	82.4303	0.203238	3.16e-19	1.36e-16	Positive	NA
mTEC	ZNF433	L1MB2	82.5759	0.209206	2.65e-20	1.31e-17	Positive	NA
mTEC	ZNF433	L1MB3	78.8028	0.208958	2.94e-20	1.45e-17	Positive	NA
mTEC	ZNF433	L1MB4	83.1707	0.209172	2.69e-20	1.33e-17	Positive	0.0814255
mTEC	ZNF433	L1MB5	87.3712	0.213016	5.24e-21	2.88e-18	Positive	0
mTEC	ZNF433	L1MB7	85.8397	0.22283	6.96e-23	5.05e-20	Positive	0.143207
mTEC	ZNF433	L1MB8	86.387	0.22246	8.22e-23	5.93e-20	Positive	0.59381
mTEC	ZNF433	L1MC1	74.7836	0.204922	1.58e-19	7.05e-17	Positive	0.015512
mTEC	ZNF433	L1MC2	81.8345	0.229186	3.78e-24	3.32e-21	Positive	NA
mTEC	ZNF433	L1MC3	92.544	0.235364	2.05e-25	2.12e-22	Positive	0
mTEC	ZNF433	L1MC4	112.196	0.206451	8.4e-20	3.87e-17	Positive	0.00672141
mTEC	ZNF433	L1MC5	106.058	0.213406	4.43e-21	2.46e-18	Positive	0.0430477
mTEC	ZNF433	L1MC5a	114.044	0.202582	4.12e-19	1.74e-16	Positive	0.107648
mTEC	ZNF433	L1MCa	96.2839	0.216013	1.43e-21	8.53e-19	Positive	0.0792372
mTEC	ZNF433	L1MD	108.39	0.230208	2.35e-24	2.14e-21	Positive	0
mTEC	ZNF433	L1MD2	98.6221	0.202886	3.64e-19	1.56e-16	Positive	NA
mTEC	ZNF433	L1MD3	95.5523	0.230324	2.23e-24	2.04e-21	Positive	NA
mTEC	ZNF433	L1ME1	108.131	0.212791	5.77e-21	3.14e-18	Positive	0.0382079
mTEC	ZNF433	L1ME2z	102.357	0.223267	5.71e-23	4.25e-20	Positive	NA
mTEC	ZNF433	L1ME3A	112.949	0.226377	1.39e-23	1.1e-20	Positive	0
mTEC	ZNF433	L1ME3B	119.132	0.208917	2.99e-20	1.47e-17	Positive	NA
mTEC	ZNF433	L1ME3Cz	119.085	0.213059	5.14e-21	2.84e-18	Positive	NA
mTEC	ZNF433	L1ME3G	122.931	0.20811	4.2e-20	2.01e-17	Positive	NA
mTEC	ZNF433	L1ME4a	121.444	0.213941	3.52e-21	1.98e-18	Positive	NA
mTEC	ZNF433	L1ME4b	118.559	0.227206	9.46e-24	7.75e-21	Positive	0.0109998
mTEC	ZNF433	L1MEc	112.594	0.206099	9.72e-20	4.42e-17	Positive	0
mTEC	ZNF433	L1MEf	118.108	0.225469	2.1e-23	1.64e-20	Positive	0
mTEC	ZNF433	L1MEg	122.683	0.201774	5.73e-19	2.37e-16	Positive	0
mTEC	ZNF433	L1PA10	46.9064	0.202739	3.87e-19	1.65e-16	Positive	0
mTEC	ZNF433	L1PA16	65.3723	0.200159	1.1e-18	4.43e-16	Positive	0.0049054
mTEC	ZNF433	L1PA4	19.8347	0.206178	9.41e-20	4.29e-17	Positive	0.000580291
mTEC	ZNF433	L1PA5	25.1912	0.201936	5.36e-19	2.23e-16	Positive	0
mTEC	ZNF433	L1PA6	32.4337	0.202142	4.93e-19	2.06e-16	Positive	0.00949934
mTEC	ZNF433	L1PA7	35.9421	0.206337	8.8e-20	4.04e-17	Positive	0
mTEC	ZNF433	L1PA8	39.415	0.214299	3.01e-21	1.71e-18	Positive	0
mTEC	ZNF433	L1PB1	49.1044	0.217511	7.43e-22	4.66e-19	Positive	0.0184259
mTEC	ZNF433	L1PREC2	57.7129	0.200218	1.07e-18	4.34e-16	Positive	100.387
mTEC	ZNF433	L2	144.256	0.220493	1.98e-22	1.36e-19	Positive	NA
mTEC	ZNF433	L2a	128.877	0.229562	3.18e-24	2.81e-21	Positive	0.0107876
mTEC	ZNF433	L2b	140.391	0.217994	6.01e-22	3.83e-19	Positive	0.00884461
mTEC	ZNF433	L2c	140.977	0.227756	7.34e-24	6.13e-21	Positive	0.000275982
mTEC	ZNF433	L3	141.644	0.214282	3.04e-21	1.72e-18	Positive	NA
mTEC	ZNF433	MIR	124.913	0.227688	7.58e-24	6.31e-21	Positive	NA
mTEC	ZNF433	MIR3	131.719	0.208527	3.53e-20	1.72e-17	Positive	NA
mTEC	ZNF433	MIRb	133.154	0.221113	1.5e-22	1.05e-19	Positive	NA
mTEC	ZNF433	MIRc	130.519	0.217884	6.31e-22	3.99e-19	Positive	NA
mTEC	ZNF44	AluJb	74.0772	0.268395	8.01e-33	8.47e-29	Positive	0
mTEC	ZNF44	AluJo	74.3033	0.256429	5.17e-30	1.55e-26	Positive	3.91e-08
cTEC	ZNF44	AluJr	76.1277	0.215721	1.36e-60	1.4e-55	Positive	4.05e-10
mTEC	ZNF44	AluJr	76.1277	0.269063	5.53e-33	6.31e-29	Positive	4.05e-10
mTEC	ZNF44	AluJr4	78.2876	0.259948	7.98e-31	3.65e-27	Positive	0.0309502
mTEC	ZNF44	AluSc	44.641	0.259391	1.08e-30	4.81e-27	Positive	8.03e-05
mTEC	ZNF44	AluSc5	42.7187	0.237314	8.02e-26	8.87e-23	Positive	NA
mTEC	ZNF44	AluSc8	44.9004	0.253169	2.84e-29	6.65e-26	Positive	9.93e-05
mTEC	ZNF44	AluSg	47.4948	0.252856	3.34e-29	7.7e-26	Positive	1.86e-06
mTEC	ZNF44	AluSg4	47.2738	0.271676	1.28e-33	2.31e-29	Positive	0.0052214
mTEC	ZNF44	AluSg7	41.787	0.254909	1.15e-29	3.08e-26	Positive	0
mTEC	ZNF44	AluSp	43.9166	0.264389	7.25e-32	5.12e-28	Positive	4.34e-09
mTEC	ZNF44	AluSq	48.0285	0.263152	1.42e-31	8.88e-28	Positive	0.00300529
mTEC	ZNF44	AluSq10	44.57	0.2494	1.98e-28	3.63e-25	Positive	NA
mTEC	ZNF44	AluSq2	48.7649	0.272415	8.46e-34	1.62e-29	Positive	1.25e-09
mTEC	ZNF44	AluSq4	44.0339	0.250565	1.09e-28	2.11e-25	Positive	NA
mTEC	ZNF44	AluSx	52.8956	0.26581	3.33e-32	2.84e-28	Positive	3.47e-09
mTEC	ZNF44	AluSx1	51.2327	0.275088	1.86e-34	6.32e-30	Positive	1.24e-09
mTEC	ZNF44	AluSx3	51.4459	0.272666	7.34e-34	1.5e-29	Positive	2.09e-07
mTEC	ZNF44	AluSx4	47.0711	0.263934	9.29e-32	6.12e-28	Positive	0.0038846
mTEC	ZNF44	AluSz	55.4724	0.267078	1.66e-32	1.59e-28	Positive	0
mTEC	ZNF44	AluSz6	59.9588	0.262	2.65e-31	1.48e-27	Positive	3.7e-08
cTEC	ZNF44	AluSz6	59.9588	0.200973	1.14e-52	2.08e-48	Positive	3.7e-08
mTEC	ZNF44	AluY	31.6825	0.273677	4.14e-34	9.76e-30	Positive	0
mTEC	ZNF44	AluYa5	6.77491	0.237751	6.49e-26	7.31e-23	Positive	0
mTEC	ZNF44	AluYb8	11.1883	0.253913	1.93e-29	4.69e-26	Positive	0
mTEC	ZNF44	AluYc	32.5372	0.237151	8.68e-26	9.53e-23	Positive	0
mTEC	ZNF44	AluYc3	29.0671	0.211228	1.13e-20	5.9e-18	Positive	0.708532
mTEC	ZNF44	AluYe5	23.649	0.209239	2.61e-20	1.3e-17	Positive	NA
mTEC	ZNF44	AluYg6	31.0589	0.221448	1.3e-22	9.12e-20	Positive	0
mTEC	ZNF44	AluYh3	35.1674	0.227471	8.37e-24	6.9e-21	Positive	0
mTEC	ZNF44	AluYj4	45.4485	0.22816	6.09e-24	5.16e-21	Positive	0
mTEC	ZNF44	AluYk2	31.1687	0.220958	1.61e-22	1.13e-19	Positive	0.0308797
mTEC	ZNF44	AluYk4	27.0219	0.212267	7.22e-21	3.87e-18	Positive	NA
mTEC	ZNF44	AluYm1	31.7677	0.251421	7.02e-29	1.43e-25	Positive	0
mTEC	ZNF44	FAM	85.0846	0.227538	8.12e-24	6.7e-21	Positive	NA
mTEC	ZNF44	FLAM_A	84.7259	0.245756	1.25e-27	1.87e-24	Positive	NA
mTEC	ZNF44	FLAM_C	74.2065	0.248914	2.54e-28	4.57e-25	Positive	0.000562633
mTEC	ZNF44	FRAM	84.0774	0.236343	1.28e-25	1.36e-22	Positive	0.162813
mTEC	ZNF44	HAL1	125.034	0.243334	4.2e-27	5.69e-24	Positive	0.162761
mTEC	ZNF44	HAL1ME	129.153	0.206031	1e-19	4.54e-17	Positive	NA
mTEC	ZNF44	L1M2	90.312	0.23234	8.63e-25	8.14e-22	Positive	0.00847347
mTEC	ZNF44	L1M3	86.3375	0.207969	4.46e-20	2.13e-17	Positive	0
mTEC	ZNF44	L1M4	98.166	0.251388	7.14e-29	1.45e-25	Positive	0.0112882
mTEC	ZNF44	L1M4a1	115.816	0.206848	7.12e-20	3.32e-17	Positive	0
mTEC	ZNF44	L1M5	125.324	0.254865	1.17e-29	3.13e-26	Positive	0.000131057
cTEC	ZNF44	L1M5	125.324	0.2277	1.75e-67	5.42e-62	Positive	0.000131057
mTEC	ZNF44	L1M6	132.317	0.203999	2.31e-19	1.01e-16	Positive	NA
mTEC	ZNF44	L1MA1	51.4267	0.201335	6.84e-19	2.81e-16	Positive	NA
mTEC	ZNF44	L1MA2	56.0415	0.215184	2.05e-21	1.2e-18	Positive	0
mTEC	ZNF44	L1MA3	60.3342	0.226111	1.57e-23	1.23e-20	Positive	7.64e-05
mTEC	ZNF44	L1MA4	76.4687	0.220866	1.68e-22	1.17e-19	Positive	0
mTEC	ZNF44	L1MA4A	73.5283	0.232	1.01e-24	9.49e-22	Positive	0.00224678
mTEC	ZNF44	L1MA5	72.917	0.204594	1.81e-19	8.02e-17	Positive	0
mTEC	ZNF44	L1MA5A	63.9142	0.226889	1.09e-23	8.87e-21	Positive	NA
mTEC	ZNF44	L1MA6	77.5591	0.21667	1.07e-21	6.6e-19	Positive	0
mTEC	ZNF44	L1MA7	77.068	0.206587	7.94e-20	3.67e-17	Positive	NA
mTEC	ZNF44	L1MA8	74.0797	0.214891	2.33e-21	1.35e-18	Positive	0.0054025
mTEC	ZNF44	L1MA9	83.3887	0.229003	4.12e-24	3.59e-21	Positive	0.000343171
mTEC	ZNF44	L1MB1	82.4303	0.22453	3.22e-23	2.47e-20	Positive	NA
mTEC	ZNF44	L1MB2	82.5759	0.226931	1.07e-23	8.75e-21	Positive	NA
mTEC	ZNF44	L1MB3	78.8028	0.275551	1.42e-34	5.46e-30	Positive	NA
mTEC	ZNF44	L1MB4	83.1707	0.247839	4.38e-28	7.45e-25	Positive	0.025478
mTEC	ZNF44	L1MB5	87.3712	0.243287	4.3e-27	5.78e-24	Positive	0.0627096
mTEC	ZNF44	L1MB7	85.8397	0.252451	4.12e-29	9.13e-26	Positive	0.000121649
cTEC	ZNF44	L1MB7	85.8397	0.204456	1.74e-54	3.59e-50	Positive	0.000121649
mTEC	ZNF44	L1MB8	86.387	0.259951	7.97e-31	3.65e-27	Positive	0.000618856
mTEC	ZNF44	L1MC	105.833	0.205584	1.2e-19	5.44e-17	Positive	0.0730662
mTEC	ZNF44	L1MC1	74.7836	0.250888	9.24e-29	1.84e-25	Positive	0.00334234
mTEC	ZNF44	L1MC2	81.8345	0.228996	4.13e-24	3.59e-21	Positive	NA
mTEC	ZNF44	L1MC3	92.544	0.252838	3.38e-29	7.72e-26	Positive	0.00104816
mTEC	ZNF44	L1MC4	112.196	0.269216	5.08e-33	6.22e-29	Positive	0
mTEC	ZNF44	L1MC4a	107.616	0.242959	5.06e-27	6.74e-24	Positive	0.0627353
mTEC	ZNF44	L1MC5	106.058	0.251945	5.36e-29	1.16e-25	Positive	0.000971115
mTEC	ZNF44	L1MC5a	114.044	0.24871	2.81e-28	4.98e-25	Positive	0.000260098
mTEC	ZNF44	L1MCa	96.2839	0.241026	1.31e-26	1.66e-23	Positive	0
mTEC	ZNF44	L1MD	108.39	0.234383	3.28e-25	3.22e-22	Positive	0.139741
mTEC	ZNF44	L1MD1	87.6221	0.2095	2.34e-20	1.18e-17	Positive	NA
mTEC	ZNF44	L1MD2	98.6221	0.232605	7.62e-25	7.22e-22	Positive	NA
mTEC	ZNF44	L1MD3	95.5523	0.250509	1.12e-28	2.13e-25	Positive	NA
mTEC	ZNF44	L1MDa	101.371	0.213633	4.02e-21	2.24e-18	Positive	0
mTEC	ZNF44	L1ME1	108.131	0.256506	4.96e-30	1.53e-26	Positive	1.08e-06
cTEC	ZNF44	L1ME2	111.434	0.201768	4.42e-53	8.56e-49	Positive	NA
mTEC	ZNF44	L1ME2	111.434	0.237437	7.56e-26	8.39e-23	Positive	NA
mTEC	ZNF44	L1ME2z	102.357	0.240038	2.13e-26	2.58e-23	Positive	NA
mTEC	ZNF44	L1ME3	110.89	0.220117	2.35e-22	1.57e-19	Positive	0.00577524
mTEC	ZNF44	L1ME3A	112.949	0.23912	3.34e-26	3.89e-23	Positive	0.00156702
mTEC	ZNF44	L1ME3B	119.132	0.234679	2.84e-25	2.82e-22	Positive	NA
mTEC	ZNF44	L1ME3Cz	119.085	0.240834	1.44e-26	1.81e-23	Positive	NA
mTEC	ZNF44	L1ME3D	121.595	0.201236	7.12e-19	2.92e-16	Positive	NA
mTEC	ZNF44	L1ME3G	122.931	0.253922	1.92e-29	4.69e-26	Positive	NA
cTEC	ZNF44	L1ME4a	121.444	0.206397	1.63e-55	3.61e-51	Positive	NA
mTEC	ZNF44	L1ME4a	121.444	0.259965	7.91e-31	3.65e-27	Positive	NA
mTEC	ZNF44	L1ME4b	118.559	0.248235	3.58e-28	6.27e-25	Positive	3.21e-05
mTEC	ZNF44	L1ME4c	124.085	0.215328	1.93e-21	1.13e-18	Positive	0.0148171
mTEC	ZNF44	L1MEc	112.594	0.256622	4.67e-30	1.47e-26	Positive	0.00358698
mTEC	ZNF44	L1MEd	129.082	0.248063	3.91e-28	6.75e-25	Positive	0.157616
mTEC	ZNF44	L1MEf	118.108	0.231006	1.62e-24	1.5e-21	Positive	0
mTEC	ZNF44	L1MEg	122.683	0.238601	4.3e-26	4.93e-23	Positive	0.0429018
cTEC	ZNF44	L1MEg	122.683	0.207554	3.94e-56	1.22e-51	Positive	0.0429018
mTEC	ZNF44	L1P3	46.9838	0.204046	2.27e-19	9.9e-17	Positive	0.0264636
mTEC	ZNF44	L1PA10	46.9064	0.23695	9.56e-26	1.04e-22	Positive	0.00419016
mTEC	ZNF44	L1PA13	53.5063	0.242357	6.82e-27	8.97e-24	Positive	0.00158915
mTEC	ZNF44	L1PA15	65.5369	0.211877	8.53e-21	4.54e-18	Positive	0
mTEC	ZNF44	L1PA16	65.3723	0.23509	2.34e-25	2.36e-22	Positive	0.010474
mTEC	ZNF44	L1PA2	10.8815	0.202571	4.14e-19	1.74e-16	Positive	0.00323377
mTEC	ZNF44	L1PA3	16.059	0.222431	8.33e-23	5.99e-20	Positive	1.55e-06
mTEC	ZNF44	L1PA4	19.8347	0.241256	1.17e-26	1.5e-23	Positive	0
mTEC	ZNF44	L1PA5	25.1912	0.247728	4.63e-28	7.84e-25	Positive	9.8e-08
mTEC	ZNF44	L1PA6	32.4337	0.207004	6.67e-20	3.12e-17	Positive	0.00019641
mTEC	ZNF44	L1PA7	35.9421	0.251479	6.81e-29	1.4e-25	Positive	2.36e-09
cTEC	ZNF44	L1PA7	35.9421	0.210419	1.13e-57	6.93e-53	Positive	2.36e-09
mTEC	ZNF44	L1PA8	39.415	0.246121	1.04e-27	1.61e-24	Positive	0
mTEC	ZNF44	L1PB1	49.1044	0.248055	3.92e-28	6.75e-25	Positive	9.33e-05
mTEC	ZNF44	L1PB3	67.6083	0.201911	5.42e-19	2.25e-16	Positive	NA
mTEC	ZNF44	L1PB4	79.3564	0.235564	1.86e-25	1.93e-22	Positive	NA
mTEC	ZNF44	L1PREC2	57.7129	0.236417	1.24e-25	1.32e-22	Positive	0
cTEC	ZNF44	L2	144.256	0.210467	1.06e-57	6.93e-53	Positive	NA
mTEC	ZNF44	L2	144.256	0.258235	1.99e-30	7.43e-27	Positive	NA
cTEC	ZNF44	L2a	128.877	0.216811	3.33e-61	5.15e-56	Positive	2.56e-08
mTEC	ZNF44	L2a	128.877	0.274315	2.88e-34	7.36e-30	Positive	2.56e-08
mTEC	ZNF44	L2b	140.391	0.259201	1.19e-30	5.13e-27	Positive	4.3e-05
cTEC	ZNF44	L2b	140.391	0.206896	8.86e-56	2.49e-51	Positive	4.3e-05
mTEC	ZNF44	L2c	140.977	0.263915	9.39e-32	6.12e-28	Positive	1.13e-09
cTEC	ZNF44	L2c	140.977	0.206796	1e-55	2.58e-51	Positive	1.13e-09
mTEC	ZNF44	L3	141.644	0.257364	3.15e-30	1.07e-26	Positive	NA
mTEC	ZNF44	MamSINE1	147.632	0.204045	2.27e-19	9.9e-17	Positive	NA
mTEC	ZNF44	MER68	93.0485	0.205306	1.35e-19	6.05e-17	Positive	0
cTEC	ZNF44	MIR	124.913	0.208101	2.01e-56	6.91e-52	Positive	NA
mTEC	ZNF44	MIR	124.913	0.274545	2.53e-34	7.04e-30	Positive	NA
mTEC	ZNF44	MIR1_Amn	127.729	0.208179	4.08e-20	1.96e-17	Positive	NA
mTEC	ZNF44	MIR3	131.719	0.261249	3.97e-31	2.1e-27	Positive	NA
mTEC	ZNF44	MIRb	133.154	0.273026	5.99e-34	1.31e-29	Positive	NA
cTEC	ZNF44	MIRb	133.154	0.206409	1.61e-55	3.61e-51	Positive	NA
mTEC	ZNF44	MIRc	130.519	0.262345	2.2e-31	1.27e-27	Positive	NA
mTEC	ZNF44	MLT1D	97.7897	0.201887	5.47e-19	2.27e-16	Positive	0
mTEC	ZNF44	MLT1J	125.854	0.211999	8.1e-21	4.32e-18	Positive	0.00927651
mTEC	ZNF44	MLT1K	127.697	0.206353	8.74e-20	4.02e-17	Positive	0.0507606
mTEC	ZNF44	MSTA	67.5629	0.227765	7.31e-24	6.12e-21	Positive	0.0122931
mTEC	ZNF44	MSTB	75.697	0.200896	8.17e-19	3.33e-16	Positive	0
mTEC	ZNF44	THE1B	57.9657	0.206271	9.05e-20	4.14e-17	Positive	0.860179
gd T	ZNF480	MLT1J1-int	130.917	0.212535	2.49e-05	0.000369917	Positive	NA
DP	ZNF490	AluYa5	6.77491	-0.210576	2.58e-287	1.87e-283	Negative	NA
B_pro/pre	ZNF493	HERV17-int	34.4191	0.313171	0.000139884	0.0121583	Positive	NA
B_pro/pre	ZNF493	LTR16B1	123.219	0.311712	0.000150842	0.0128874	Positive	NA
B_pro/pre	ZNF506	LTR1F	63.5775	0.316411	0.00011816	0.0107304	Positive	0
B_pro/pre	ZNF506	LTR33A	125.443	0.2786	0.000753595	0.0456635	Positive	0.0755775
B_pro/pre	ZNF506	LTR45C	75.4649	0.322114	8.74e-05	0.00822561	Positive	NA
B_pro/pre	ZNF506	MER87B	66.7441	0.296897	0.000317295	0.0229645	Positive	NA
VSMC	ZNF641	AluJb	74.0772	0.204921	8.03e-09	5.65e-06	Positive	0
VSMC	ZNF641	AluJr4	78.2876	0.241918	7.99e-12	1.4e-08	Positive	0
VSMC	ZNF641	AluSp	43.9166	0.229127	1e-10	1.27e-07	Positive	0
VSMC	ZNF641	AluSq2	48.7649	0.22961	9.12e-11	1.2e-07	Positive	0
VSMC	ZNF641	AluSx1	51.2327	0.208196	4.57e-09	3.49e-06	Positive	1.13e-06
VSMC	ZNF641	HAL1	125.034	0.224787	2.28e-10	2.67e-07	Positive	0
VSMC	ZNF641	L1M5	125.324	0.227228	1.44e-10	1.76e-07	Positive	0
VSMC	ZNF641	L1MA2	56.0415	0.203318	1.05e-08	7.23e-06	Positive	0
VSMC	ZNF641	L1MA3	60.3342	0.202662	1.18e-08	7.95e-06	Positive	0
VSMC	ZNF641	L1MB2	82.5759	0.201768	1.37e-08	9.05e-06	Positive	NA
VSMC	ZNF641	L1MB3	78.8028	0.202047	1.31e-08	8.68e-06	Positive	NA
VSMC	ZNF641	L1MB5	87.3712	0.214208	1.59e-09	1.43e-06	Positive	0
VSMC	ZNF641	L1MB8	86.387	0.22369	2.8e-10	3.2e-07	Positive	0
VSMC	ZNF641	L1MC1	74.7836	0.208096	4.65e-09	3.54e-06	Positive	0
VSMC	ZNF641	L1MC5	106.058	0.225202	2.11e-10	2.5e-07	Positive	0
VSMC	ZNF641	L1MDa	101.371	0.204988	7.93e-09	5.62e-06	Positive	0
VSMC	ZNF641	L1ME1	108.131	0.203605	1e-08	6.92e-06	Positive	0
VSMC	ZNF641	L1ME2z	102.357	0.219026	6.64e-10	7.04e-07	Positive	NA
VSMC	ZNF641	L1ME3G	122.931	0.21799	8.02e-10	8.07e-07	Positive	NA
VSMC	ZNF641	L1ME4b	118.559	0.207224	5.41e-09	4e-06	Positive	0
VSMC	ZNF641	L1MEd	129.082	0.215084	1.36e-09	1.25e-06	Positive	0
VSMC	ZNF641	L1PA4	19.8347	0.218097	7.86e-10	7.94e-07	Positive	0
VSMC	ZNF641	L2a	128.877	0.212198	2.27e-09	1.92e-06	Positive	0
VSMC	ZNF641	L2b	140.391	0.229718	8.93e-11	1.18e-07	Positive	0
VSMC	ZNF641	L2c	140.977	0.209266	3.79e-09	3.01e-06	Positive	0
VSMC	ZNF641	L3	141.644	0.221484	4.22e-10	4.64e-07	Positive	NA
VSMC	ZNF641	MIR3	131.719	0.204908	8.04e-09	5.65e-06	Positive	NA
VSMC	ZNF641	MIRc	130.519	0.200068	1.82e-08	1.12e-05	Positive	NA
VSMC	ZNF641	MLT1B	85.5264	0.218973	6.7e-10	7.04e-07	Positive	0
VSMC	ZNF641	MLT2B4	86.2165	0.216169	1.12e-09	1.06e-06	Positive	0
Mono/Macro	ZNF655	CR1-L3A_Croc	140.537	0.262149	0.000239556	0.0105986	Positive	NA
B_pro/pre	ZNF655	ERVL-E-int	137.479	0.284022	0.000586725	0.0371186	Positive	NA
Mono/Macro	ZNF655	L1MA10	90.8839	0.252648	0.000407068	0.0168341	Positive	NA
Mono/Macro	ZNF655	L1PA13	53.5063	0.230976	0.00126723	0.0406606	Positive	NA
Mono/Macro	ZNF655	L2-3_Crp	134.409	0.243475	0.000666473	0.0251878	Positive	NA
Mono/Macro	ZNF655	LTR56	82.4706	0.2898	4.56e-05	0.00275494	Positive	NA
B_pro/pre	ZNF655	LTR83	123.903	0.341919	2.92e-05	0.00343788	Positive	NA
B_pro/pre	ZNF655	MER21C	100.39	0.276962	0.000811988	0.0483398	Positive	NA
Mono/Macro	ZNF655	MER51-int	63.2791	0.25181	0.000426149	0.0174558	Positive	NA
Mono/Macro	ZNF655	MER70-int	103.745	0.24455	0.00062966	0.0241431	Positive	NA
Mono/Macro	ZNF655	MER74C	95.753	0.226415	0.00158896	0.0480336	Positive	NA
Mono/Macro	ZNF655	MER92B	101.853	0.239101	0.00083772	0.0300997	Positive	NA
B_pro/pre	ZNF655	MLT1G	117.456	0.3345	4.44e-05	0.00478734	Positive	NA
DP	ZNF66	AluJb	74.0772	-0.22326	1.97626258336499e-323	6.16440765659665e-319	Negative	NA
DP	ZNF66	AluJo	74.3033	-0.216606	2.77e-304	2.88e-300	Negative	NA
DP	ZNF66	AluJr	76.1277	-0.217792	1.11e-307	1.28e-303	Negative	NA
DP	ZNF66	AluJr4	78.2876	-0.206113	4.3e-275	2.4e-271	Negative	NA
DP	ZNF66	AluSc	44.641	-0.227121	0	0	Negative	NA
DP	ZNF66	AluSc5	42.7187	-0.220557	1.09753566657539e-315	1.80181852731344e-311	Negative	NA
DP	ZNF66	AluSc8	44.9004	-0.2206	8.21187023781008e-316	1.42303499351011e-311	Negative	NA
DP	ZNF66	AluSg	47.4948	-0.22319	1.97626258336499e-323	6.16440765659665e-319	Negative	NA
DP	ZNF66	AluSg4	47.2738	-0.221673	6.01040739478793e-319	1.44213715030542e-314	Negative	NA
DP	ZNF66	AluSg7	41.787	-0.214552	1.92e-298	1.81e-294	Negative	NA
[truncated: 579 more rows]

## Sheet: Supplementary file 1d
Supplementary file 1d. Interactions between TE and transcription factors.
[truncated: 50,636 more rows]

[truncated: 6 more sheets: Supplementary file 1e, Supplementary file 1f, Supplementary file 1g, Supplementary file 1h, Supplementary file 1i, Supplementary file 1j]
